# Supplementary material for: Investigation and validation of stereocilia development in homogenic cochlea progenitor cell organoid using bulk and single-cell RNA sequencing analysis
Source: Research Square preprint supplement (doi:10.21203/rs.3.rs-4480113/v1), 2024-06-21
Supplement: Supplementary file 1 [file 984aa48b8a188fdf685d629f.xlsx]

## Sheet: Supple #1
Supplemenraty Table 1. Differentially expressed genes in MACS vs MI
Gene_id	MI_1	MI_2	MI_3	MACs_1	MACs_2	MACs_3	log2FoldChange	pvalue	padj	Status
Matn1	0.11	0.24	0.83	1945.02	684.05	1863.85	11.907	1.20864e-21	3.54632e-19	UP
Acan	0.04	0.13	0.25	576.39	311.38	665.34	11.3566	2.0201e-20	5.14992e-18	UP
Snorc	0	0	0	549.08	229.04	393.47	10.9375	6.37764e-19	1.35861e-16	UP
Fosb	0.39	1.3	0.8	1441.36	1263.29	694.47	10.6828	1.22233e-22	3.96008e-20	UP
Cytl1	0.04	0.23	0.12	197.27	308.27	182.27	10.2559	3.66631e-16	5.13647e-14	UP
Hapln1	0.01	0.03	0.26	224.1	145.7	275.89	10.1023	1.89253e-16	2.88537e-14	UP
Mfap4	0.12	0.26	0.22	148.89	210.99	257.71	10.0804	6.0645e-16	8.34593e-14	UP
Fmod	0.09	0.45	0.55	247.51	277.68	431.9	9.73581	3.08175e-15	3.74408e-13	UP
Cdh5	0.05	0.1	0.34	173.12	97.02	226.35	9.71284	7.36074e-15	8.35525e-13	UP
Col10a1	0.06	0.05	0.1	103.71	223.77	127.27	9.67899	7.22219e-14	6.13729e-12	UP
Klf2	0.14	0.42	1.11	438.91	259.68	213.13	9.63793	5.85015e-15	6.8921e-13	UP
Ccl3	0.12	0.25	1.1	478.86	164.48	182.75	9.45959	9.78391e-14	8.13096e-12	UP
Ttr	0.03	0	0.5	9.13	321.91	22.38	9.44151	0.000260883	0.00267788	UP
Pecam1	0.06	0.2	0.06	141.36	84.13	160.36	9.35181	4.20798e-14	3.87209e-12	UP
Aspn	0.14	0.09	0.2	156.28	119.35	102.66	9.34465	3.27015e-14	3.04516e-12	UP
Comp	0.06	0.36	1.22	259.04	212.8	255.55	9.3291	1.06317e-14	1.14815e-12	UP
C1qb	0.04	0.37	1.91	659.89	213.42	504.73	9.32584	4.66457e-17	7.9713e-15	UP
Clec3a	0	0	0.08	149.23	70.04	146.5	9.2631	1.21906e-13	9.92547e-12	UP
Hbb-bs	0.58	0.17	0	136.31	192.05	345.41	9.23165	4.01338e-13	3.02971e-11	UP
Cldn5	0.03	0.09	0.33	130.19	73.33	140.89	9.18659	1.41309e-13	1.1386e-11	UP
Eln	0.57	0.37	1.14	424.97	332.78	335.73	9.02907	8.48037e-18	1.60827e-15	UP
C1qc	0.1	0.18	1.68	578.61	181.39	335.18	8.99218	7.81507e-16	1.02128e-13	UP
C1qa	0.08	0.43	1.72	567.59	166.81	348.27	8.97461	1.2581e-15	1.61692e-13	UP
Ctss	0	0	0.8	374.07	67.46	134.33	8.90523	2.35879e-11	1.33874e-09	UP
Mrc1	0.09	0.18	0.85	260.6	121.52	164.44	8.88497	5.94334e-13	4.38033e-11	UP
Gm56663	0	0.13	0.23	179.64	27.87	79.75	8.86813	1.02118e-10	5.17278e-09	UP
Csf1r	0.03	0.05	0.91	264.18	109.62	167.9	8.86507	9.15257e-13	6.49916e-11	UP
Omd	0.28	0.13	0.39	87.69	89.65	89.76	8.86251	8.03551e-13	5.7852e-11	UP
Tyrobp	0.09	0.2	1.65	570.09	163.02	255.43	8.84101	7.03404e-15	8.10269e-13	UP
Lyve1	0.03	0.07	0.3	100.65	56.46	110.54	8.82588	1.83905e-12	1.24344e-10	UP
Tie1	0.01	0.04	0.07	117.14	43.15	108.91	8.81122	6.20266e-12	3.8583e-10	UP
F13a1	0	0.14	0.66	253.47	83.88	185.64	8.80214	2.96567e-12	1.92967e-10	UP
Ccl4	0.07	0	0.2	180.15	46.61	32.66	8.73571	3.85771e-10	1.68989e-08	UP
Matn3	0.07	0.08	0.03	105.96	46.42	88.84	8.66096	7.41897e-12	4.4892e-10	UP
Pld4	0.13	0.08	0.32	124.74	34.88	58.81	8.49848	1.14989e-10	5.71307e-09	UP
Susd5	0.4	0.13	0.12	69.65	56.1	84.06	8.49338	1.03606e-11	6.10296e-10	UP
Fcrl2	0	0.09	0.22	97.38	40.97	75.21	8.4816	2.48197e-11	1.39845e-09	UP
Il1b	0	0	0.16	152.39	20.72	46.74	8.47116	2.33445e-09	8.79009e-08	UP
Gm25835	0	0	0	120.37	32.85	54.28	8.41604	2.17257e-10	1.00553e-08	UP
C1qtnf3	0.05	0	0.84	124.38	68.76	186.91	8.36561	4.22247e-11	2.29593e-09	UP
Cd93	0.01	0.02	0.06	68.42	38.37	80.6	8.30689	7.24482e-11	3.76803e-09	UP
Fcgr3	0.18	0.49	1.34	149.97	59.67	144.48	8.24926	6.22802e-11	3.27202e-09	UP
Robo4	0.02	0.01	0.04	67.3	31.5	77.15	8.21194	1.93307e-10	9.02736e-09	UP
Fam180a	0	0	0.02	74.43	44.69	47.68	8.15177	1.16825e-10	5.78582e-09	UP
Gdf10	0.08	0.03	1.31	108.04	68.56	134.16	8.08527	8.13211e-11	4.1875e-09	UP
Stab1	0.04	0.12	0.95	122.78	62.69	111.08	8.0091	1.13837e-10	5.67398e-09	UP
Pf4	0	0.37	10.33	1581.55	303.59	604.6	7.98381	5.58834e-06	9.81969e-05	UP
Ms4a6d	0	0.03	0.5	76.81	21.01	54.8	7.98373	2.37016e-09	8.90297e-08	UP
Ctla2a	0	0	0.34	64.01	22.92	62.42	7.95896	1.58184e-09	6.2119e-08	UP
Erg	0	0.11	0.1	45.13	37.02	56.15	7.88879	6.18317e-10	2.63437e-08	UP
Fcer1g	0.68	0.38	2.31	305.65	176.58	265.97	7.88145	4.71908e-19	1.03361e-16	UP
Ms4a6c	0.02	0.09	0.33	77.52	19.87	42.69	7.86132	5.97482e-09	2.05563e-07	UP
Ifi207	0	0.02	0.36	68.03	31.19	39.26	7.8599	1.34644e-09	5.38266e-08	UP
Spi1	0.02	0	0.13	78.05	23.78	38.4	7.85877	4.08518e-09	1.45042e-07	UP
Ms4a7	0	0	0.5	77.87	26.5	34.57	7.85212	3.97182e-09	1.41836e-07	UP
Gpihbp1	0	0	0	44.95	32.79	55.69	7.84007	9.51839e-10	3.92627e-08	UP
Plek	0.02	0	0.61	184.24	48.97	33.92	7.8135	1.51604e-08	4.88115e-07	UP
Hbb-bt	0.08	0	0	35.67	34.3	55.07	7.75105	2.22748e-09	8.42813e-08	UP
Atf3	0.38	1.46	6.11	725.07	501.1	266.59	7.71129	8.36526e-26	3.94207e-23	UP
Ms4a4a	0	0	0.73	145.22	25.34	67.7	7.63611	1.88027e-08	5.93106e-07	UP
Adgrf5	0.01	0.03	0.03	36.24	27.04	51.87	7.61906	5.51037e-09	1.90004e-07	UP
Gm12671	0	0	0	44.55	25.45	45.36	7.6066	4.48321e-09	1.58092e-07	UP
Smpd3	0.1	0.11	0.29	34.36	48.26	26.64	7.5919	1.29248e-08	4.22255e-07	UP
Kdr	0.06	0.19	0.97	82.91	43.82	94.61	7.59013	1.89895e-09	7.32769e-08	UP
Panx3	0	0.03	0.05	28.19	50.2	27.54	7.56469	2.29662e-08	7.17164e-07	UP
Vwf	0.28	0.21	0.19	35.29	21.6	52.33	7.53267	1.39402e-08	4.54473e-07	UP
Cx3cr1	0.01	0.04	0.07	52.71	29.46	23.69	7.49066	1.74821e-08	5.54826e-07	UP
Plac9	0	0.16	1.61	169.01	104.07	99.55	7.47484	7.38812e-12	4.48799e-10	UP
Zim1	0.13	0.05	0.86	71.38	47.94	84.33	7.47357	2.46623e-09	9.19719e-08	UP
Sele	0	0	0.14	71.98	16.97	17.89	7.45311	2.30161e-07	5.75439e-06	UP
Laptm5	0.23	1.09	1.76	299.4	87.27	178.29	7.44651	1.01935e-14	1.10852e-12	UP
Aif1	0.05	0	0.29	58.1	15.54	31.17	7.43969	5.62909e-08	1.61212e-06	UP
Ccl9	0	0.01	0.3	64.56	16.15	23.52	7.43125	1.18014e-07	3.13717e-06	UP
Fcgr2b	0.08	0.12	1.23	105.84	30.29	61.57	7.39376	1.62482e-08	5.18842e-07	UP
Fam110d	0.46	0.32	0.3	45.32	16.13	37.71	7.36902	4.55798e-08	1.33235e-06	UP
Coch	0.44	0.7	11.44	767.06	389.82	814.42	7.33478	3.74149e-29	2.42433e-26	UP
Tmem204	0.08	0.11	0.28	34.75	20.41	40.4	7.33173	2.92967e-08	8.9332e-07	UP
Cyth4	0.01	0.1	0.25	54.01	16.79	25.47	7.31599	9.68519e-08	2.61938e-06	UP
Gm54819	6.39	39.28	0	2797.72	1802.1	3167.88	7.28983	1.43548e-06	2.96456e-05	UP
Ms4a6b	0	0.03	0.33	45.97	14.91	32.46	7.27423	8.85704e-08	2.4335e-06	UP
Hba-a1	0.99	0.91	1.94	111.21	172.84	350.74	7.26757	3.54249e-16	5.00812e-14	UP
Tnf	0.03	0.2	0.83	100.3	30.75	45.48	7.22677	3.99139e-08	1.1778e-06	UP
Clec4a2	0	0	0.26	45.88	17.55	22.63	7.186	1.23817e-07	3.27462e-06	UP
Ogn	2.94	0.4	7.99	453.42	574.91	577.17	7.17153	1.80062e-36	1.75009e-33	UP
Dll4	0.05	0.47	0.12	55.45	12.02	20.11	7.15472	6.67881e-07	1.50525e-05	UP
Kcne1	0.24	0.18	0.03	7.74	40.99	29.01	7.15439	2.13342e-06	4.18371e-05	UP
Ly86	0	0.04	0.16	37.05	16.81	29.63	7.14452	9.24764e-08	2.50978e-06	UP
Clec4a1	0.15	0.22	0.41	41.31	16.95	26.16	7.13912	1.1768e-07	3.13364e-06	UP
Fabp4	0	0.05	0.84	81.53	40.55	38.1	7.12594	3.32093e-08	9.93148e-07	UP
Hba-a2	1.22	3.75	1.61	191.56	271.63	536.07	7.10545	1.8249e-22	5.67581e-20	UP
Inpp5d	0	0.04	0.08	42.84	11.43	29.3	7.09955	4.24363e-07	1.00599e-05	UP
Tspan18	0.47	0.75	0.88	80.32	76.24	121.69	7.06064	1.41543e-10	6.79364e-09	UP
C5ar1	0	0.02	0.43	55.09	13.8	12.45	7.05498	1.97534e-06	3.9082e-05	UP
Msr1	0	0.03	0.13	43.42	12.12	25.44	7.04907	4.59772e-07	1.08168e-05	UP
Apold1	0.48	1.36	0.8	173.02	42.76	71.3	7.04187	2.09098e-09	7.96981e-08	UP
Ibsp	0	0.02	1.11	98.57	39.73	11.76	7.01789	1.20707e-06	2.56087e-05	UP
Csf2rb	0.01	0.01	0.11	48.24	8.55	21.78	7.01217	1.51628e-06	3.09445e-05	UP
Gimap6	0.14	0.47	1.81	103.94	57.83	109.46	7.00754	2.22886e-10	1.02851e-08	UP
Atp1a2	0.61	0.44	1.66	138.69	99.08	164.17	6.99473	9.03924e-15	9.96945e-13	UP
Col3a1	0.96	2.21	20.91	1248.11	719.51	1018.49	6.97567	1.01915e-25	4.66139e-23	UP
Car3	1.28	0.35	21.76	567.73	1305.73	673.08	6.96549	9.95819e-06	0.000162845	UP
Lrrc25	0	0.02	0.21	47.62	9.48	18.06	6.93497	2.61684e-06	5.01163e-05	UP
Zbtb16	0.07	0.08	0.01	33.58	9.13	30.38	6.91801	1.22079e-06	2.58293e-05	UP
Slco2b1	0	0.01	0.02	25.59	15.53	29.28	6.91565	3.03084e-07	7.41078e-06	UP
Ctla2b	0	0.06	0.05	38.04	11.33	23.02	6.89918	9.45284e-07	2.04395e-05	UP
2700069I18Rik	0.36	0.22	0.34	21.05	24.58	21.47	6.87228	4.17251e-07	9.95194e-06	UP
Nckap1l	0.02	0.04	0.13	36.8	14.46	19.03	6.87087	7.50834e-07	1.66759e-05	UP
Slfn5	0.07	0.16	0.13	32.03	12.47	24.59	6.85092	7.40433e-07	1.64728e-05	UP
Vtn	0.11	0.09	0.1	32.84	9.55	25.88	6.84146	1.22578e-06	2.58996e-05	UP
Hhip	0.02	0.01	0.23	29.3	18.71	18.54	6.83882	4.3267e-07	1.02412e-05	UP
Depp1	0.03	0.07	0	58.78	4.69	7.51	6.83787	4.43985e-05	0.000589113	UP
Cav1	0.16	0.7	2.28	121.79	90.47	145.73	6.83302	4.64917e-14	4.25289e-12	UP
Gm6377	0.01	0.04	0.12	46.47	12.57	9.95	6.82965	5.18702e-06	9.22151e-05	UP
Cacna1e	0	0.08	0.03	26.89	15.28	25.2	6.8278	4.7958e-07	1.12149e-05	UP
Nlrp3	0	0.04	0.06	50.02	7.87	10.86	6.80266	1.21074e-05	0.000194306	UP
Rgs1	0	0	0.02	44.9	5.4	19.15	6.79947	1.20528e-05	0.000193629	UP
Scarf1	0.14	0.19	0.37	22.48	11.9	30.37	6.75882	1.27239e-06	2.67752e-05	UP
Adgrl4	0.03	0.05	0.1	22.98	11.59	29.3	6.75719	1.18665e-06	2.52443e-05	UP
Il1a	0.17	0.41	0.29	39.83	12.68	11.51	6.75324	3.69148e-06	6.79363e-05	UP
Il6	0.02	0.16	0.1	45.55	12.04	6.82	6.73716	1.57734e-05	0.000243587	UP
Adamts20	0.18	0.35	0.36	29.11	14.66	19.15	6.73624	8.88791e-07	1.94123e-05	UP
Bcl2a1b	0	0	0	49.57	6.62	8.63	6.73146	2.56655e-05	0.000365498	UP
Mmp9	0.05	0.06	2.66	56.92	175.27	67.88	6.72094	9.65857e-10	3.97356e-08	UP
Rac2	0	0.04	0.19	30.27	13.99	18.43	6.70753	1.23465e-06	2.60515e-05	UP
ENSMUSG00000121322	0.04	0.05	0.11	16.3	17.81	25.91	6.70093	1.30783e-06	2.73376e-05	UP
Shisa3	0.01	0.01	0.1	22	14.37	24.55	6.69825	1.05373e-06	2.25711e-05	UP
Lrrc17	0.1	0.13	0.58	35.29	34.31	48.05	6.69696	1.90163e-07	4.83996e-06	UP
Cd86	0.01	0.02	0.03	35.3	12.28	15.07	6.68991	2.81446e-06	5.36368e-05	UP
Cd52	0.1	0.68	0.31	63.82	18.53	37.59	6.68674	5.40304e-07	1.24478e-05	UP
Ushbp1	0.02	0.07	0.08	19.18	11.56	29.02	6.6717	2.06989e-06	4.08488e-05	UP
Cma1	0	0.04	0.14	47.57	2.83	13.18	6.67077	6.52029e-05	0.000824366	UP
Lyl1	0.36	0.09	0.43	28.5	12.22	20.02	6.6558	1.71145e-06	3.44304e-05	UP
Lsp1	0.2	0.2	1.05	52.5	27.1	35.37	6.63014	2.78302e-07	6.85876e-06	UP
Fos	6.32	22.34	38.09	1732.73	2711.31	1872.8	6.62045	6.13147e-40	6.81075e-37	UP
Srpx	0.14	0.25	1.7	64.68	59.88	77.94	6.61762	2.10117e-09	7.98906e-08	UP
Lilrb4b	0	0	0.07	40.94	8.62	10.21	6.61612	1.56915e-05	0.000243022	UP
Fmo1	0.09	0.16	0.08	20.23	15.72	20.66	6.61351	1.38421e-06	2.87395e-05	UP
Ptprb	0.03	0.02	0.02	19.7	15.12	21.86	6.60942	1.48924e-06	3.04725e-05	UP
Ccm2l	0.03	0	0.02	18.82	12.04	26.12	6.59861	2.4764e-06	4.78986e-05	UP
Sult1a1	0.23	0.64	0.18	43.07	22.11	45.61	6.58946	4.21796e-07	1.00296e-05	UP
H2-Aa	0.22	0.17	0.99	92.01	8.46	16.12	6.56665	2.08087e-05	0.00030907	UP
H19	23.01	132.77	15.01	5707.24	5026.46	6573.74	6.55804	2.29535e-21	6.48999e-19	UP
Cd84	0	0	0.19	29.04	12.25	15.03	6.55399	3.72969e-06	6.85585e-05	UP
Abcc9	0.08	0.06	0.24	30.62	7.3	19.26	6.55237	9.18478e-06	0.000152273	UP
Fli1	0.05	0.02	0.62	39.43	25.57	41.77	6.55004	3.68199e-07	8.8773e-06	UP
Lepr	0	0.01	0.13	22.69	13.93	17.96	6.54884	2.12872e-06	4.17977e-05	UP
Krt15	0.02	0	0.14	6.96	23.56	20.59	6.54849	1.59753e-05	0.00024646	UP
Igsf6	0.24	0.28	0.12	37.65	7.76	11.01	6.54186	1.85871e-05	0.000280086	UP
Cd300c2	0	0	0.09	32.9	8.86	14.09	6.53167	8.83511e-06	0.000147104	UP
Ccl24	0.26	0	0.18	19.57	13.11	20.51	6.52411	2.55899e-06	4.91295e-05	UP
Adgre1	0.01	0.04	0.92	45.91	22.29	38.04	6.52044	5.36144e-07	1.23887e-05	UP
Hcls1	0.07	0.06	0.74	62.04	17.12	29.41	6.51754	1.62589e-06	3.28366e-05	UP
AI662270	0.24	0	0.24	27.73	11.02	15.28	6.49885	5.14946e-06	9.19395e-05	UP
Adap2	0.04	0.16	0.35	33.4	6.8	15.35	6.49534	1.49062e-05	0.000232271	UP
S100a8	0	0	2.36	136.1	29.73	27.37	6.49121	5.25759e-07	1.22375e-05	UP
Col8a2	1.02	1.28	2.38	164.91	89.07	126.81	6.48806	4.52532e-16	6.28332e-14	UP
Stfa1	0.08	0	0	23.56	15.9	11.92	6.47581	4.80417e-06	8.65697e-05	UP
Cd163	0.35	0.45	0.55	62.97	15.54	26.1	6.47232	2.54644e-06	4.89489e-05	UP
Grep1	0.27	0.47	0.29	15.13	11.58	23.61	6.44825	5.77791e-06	0.000101185	UP
Dlk1	0.02	0.22	10.07	321.47	176.08	326.79	6.43803	4.93121e-05	0.000646043	UP
Cd33	0	0.01	0.11	29.3	9.5	13.1	6.4369	9.76185e-06	0.000160439	UP
Klhl6	0	0	0.07	26.64	6.72	18.02	6.42628	1.32883e-05	0.000210648	UP
Aoc3	0.2	0.16	0.04	16.72	13.61	18.97	6.42545	4.14189e-06	7.57771e-05	UP
Grap	0.02	0.05	0.08	22.92	9.86	17.7	6.42218	6.05261e-06	0.000105284	UP
Il10ra	0.04	0.12	0.15	37.97	4.84	9.6	6.41777	6.67355e-05	0.000840327	UP
Gm49339	0	0	0.69	62.88	20.38	16.87	6.41064	4.44283e-06	8.07131e-05	UP
Cmklr1	0.04	0.1	0.14	22.98	8.7	17.79	6.38855	8.40803e-06	0.000140746	UP
Notch4	0.33	0.22	0.33	16.89	11.31	20.99	6.38247	6.66088e-06	0.00011433	UP
Esrrb	0.06	0.08	0.39	5.49	23.43	16.51	6.35459	6.0577e-05	0.000771526	UP
Il1r2	0.08	0.06	0.03	38.45	4.03	9.06	6.3541	0.000125115	0.00145199	UP
Iqcn	0.02	0.03	0	12.4	13.67	21.47	6.3493	9.72689e-06	0.000160236	UP
Fmo2	0.01	0	0.06	16.33	13.97	16.52	6.34027	6.48901e-06	0.00011175	UP
Itgam	0	0.02	0.15	27.67	6.61	13.61	6.33669	2.30771e-05	0.000336023	UP
Prnd	0.27	0.39	0.48	16.72	12.39	17.66	6.32817	7.22005e-06	0.000123248	UP
Aoah	0	0.01	0.22	26.15	9.58	12.22	6.32744	1.45955e-05	0.000228575	UP
Rtl3	0	0	0	19.93	11.73	14.7	6.32148	7.67257e-06	0.000129691	UP
Clec4n	0	0	1.05	64.33	12.67	18.21	6.31438	1.07653e-05	0.000174569	UP
Fermt3	0.37	0.88	0.5	49.06	16.18	28.01	6.31193	2.82238e-06	5.37219e-05	UP
Icam2	0.09	0.2	0.09	12.41	11.94	21.93	6.30898	1.31942e-05	0.000209798	UP
Ptprc	0	0.01	0.13	29.7	6.66	10.61	6.30114	3.75733e-05	0.000508532	UP
Vav1	0	0.01	0.06	29.5	6.99	11.18	6.30114	3.75733e-05	0.000508532	UP
Selp	0	0.03	0.55	62.29	16.42	15.1	6.29406	1.06703e-05	0.000173209	UP
Cldn11	0.42	0.39	11.1	304.41	239.28	260.63	6.29376	0.000108662	0.00128112	UP
Hpgds	0.03	0.03	0.11	24.99	11.3	9.99	6.27338	2.02515e-05	0.000301658	UP
Ccr1	0	0.03	0.18	32.7	8.1	6.37	6.26713	9.46631e-05	0.00114141	UP
Svep1	0.06	0.05	0.62	33.42	24.74	28.95	6.26038	1.4478e-06	2.98209e-05	UP
Rasgrp3	0.03	0.03	0.26	15.53	10.21	18.79	6.25819	1.27238e-05	0.000203777	UP
Stfa2l1	0	0	0	15.62	16.46	11.52	6.25808	1.25307e-05	0.000200891	UP
Fcgr1	0.01	0	0.09	25.35	7.86	12.52	6.25718	2.33366e-05	0.000339166	UP
Sox17	0	0	0	18.77	8.64	16.97	6.24576	1.45026e-05	0.000228039	UP
Cybb	0	0.02	0.18	28.3	7.4	10.69	6.24355	4.20166e-05	0.000561341	UP
Esam	0.24	0.2	3.42	95.36	40.75	100.72	6.23175	2.46273e-10	1.12103e-08	UP
Mpeg1	0.05	0.06	0.52	60.47	9.75	20.05	6.23031	1.6909e-05	0.000258557	UP
Scin	0	0.03	0.28	15.86	11.01	16.37	6.19888	1.42534e-05	0.000224575	UP
Dab2	0.36	1.18	9.47	306.09	199.41	243.05	6.18908	7.41165e-25	3.1151e-22	UP
She	0.03	0.03	0.04	16.49	9.24	17.66	6.18776	1.92625e-05	0.000288142	UP
Arhgap25	0	0	0.04	25.8	5.75	11.6	6.17748	5.64743e-05	0.000726412	UP
Mndal	0.06	0.04	0.13	18.7	7.79	16.35	6.17458	2.34951e-05	0.000340013	UP
Gm525	0	0	0	10.95	16.19	14.29	6.17236	2.35042e-05	0.000340013	UP
Tpsb2	0	0	0	30.63	2.15	12.05	6.17083	0.000329398	0.00324207	UP
Clec7a	0	0	0.14	37.5	2.92	3.57	6.15702	0.000663638	0.00583064	UP
Ecm2	0.07	0.12	0.07	14.23	13.11	14.08	6.14757	1.84809e-05	0.000278755	UP
Fat4	0.13	0.43	0.57	25.31	25.67	28.1	6.1373	3.05038e-06	5.77789e-05	UP
Cxcl2	0	0.56	8.61	394.67	115.64	216.14	6.13638	7.72257e-16	1.01774e-13	UP
Col14a1	0.2	0.65	5.96	172.98	154.85	174.08	6.12745	1.41929e-21	4.0873e-19	UP
Sox18	0.05	0	0	18.43	7.85	14.85	6.10847	3.06155e-05	0.000425851	UP
Spock3	0.01	0.06	0.2	13.21	10.67	15.6	6.10391	2.47822e-05	0.000355197	UP
Cd180	0.16	0.13	0.06	24.59	10.18	5.65	6.10063	9.52629e-05	0.00114662	UP
Csf2rb2	0	0.02	0.1	27.22	5.05	10.18	6.09928	0.000121331	0.0014176	UP
Arhgef15	0.04	0.14	0.11	14.01	8.8	16.72	6.08953	3.03987e-05	0.000423283	UP
Upk1b	0.1	0.13	0.41	12.28	13.76	13.21	6.08865	2.89096e-05	0.00040502	UP
Folr2	0.19	0.29	0.99	32.34	17.61	28.4	6.08642	4.02323e-06	7.36928e-05	UP
Nfam1	0.02	0.15	0.24	20.91	8.68	10.03	6.07058	4.59104e-05	0.000606587	UP
Acta2	0.09	0.22	0.63	29.12	27.42	18.55	6.06245	5.49031e-06	9.68025e-05	UP
Fcna	0.11	0.22	0.57	40.3	13.53	24.11	6.06214	8.03337e-06	0.000135056	UP
Wfdc17	0	0	0.19	35.45	3.12	4.39	6.06062	0.000793212	0.0067222	UP
2610035F20Rik	0	0.02	0.41	14.74	10.23	14.42	6.05686	2.97586e-05	0.000415045	UP
Dnm3os	0.32	0.48	1.16	37.77	21.52	16.29	6.05298	8.16849e-06	0.000137032	UP
Maf	0.93	0.92	3.32	124.2	108	109.57	6.04186	6.33276e-17	1.05893e-14	UP
Milr1	0.03	0.2	0.14	24.79	6.37	9	6.03957	0.000117264	0.00137587	UP
Clec4e	0	0	0.22	31.66	3.36	6.06	6.03369	0.000546186	0.00496419	UP
Dok2	0.44	0.41	0.46	18.61	6.72	13.2	6.02711	5.51496e-05	0.000712319	UP
Gmfg	0.77	0.39	1.45	63.61	31.44	44.05	6.02526	1.00502e-07	2.70868e-06	UP
Tlr7	0	0.02	0.01	20.07	7.11	11.75	6.02419	6.05396e-05	0.000771526	UP
Tbx18	0.36	0.53	8.44	227.09	153.51	219.62	6.0205	7.79133e-23	2.7537e-20	UP
Prdm1	0.08	0.14	0.46	24.28	7.75	6.69	6.01831	0.000117152	0.00137587	UP
Tll2	0.09	0.03	0.02	13.53	14.02	9.25	6.0101	5.13653e-05	0.000667877	UP
Arsi	0.18	0.09	0.83	23.74	25.25	22.53	6.00584	5.93486e-06	0.000103468	UP
Begain	0.2	0.28	0.36	17.95	8.59	11.49	6.00525	4.79438e-05	0.000630241	UP
Garin4	0	0.02	0	12.05	12.09	13.05	6.00292	4.0384e-05	0.000542794	UP
Clec10a	0.08	0.09	0.34	20.42	8.04	9.89	5.99292	6.7516e-05	0.000848094	UP
Asb4	0.09	0.06	0.88	37.51	14.63	21.15	5.9921	9.95855e-06	0.000162845	UP
Kcnj8	0.02	0.11	0.21	24.64	3.95	9.53	5.98817	0.000219098	0.00230372	UP
Islr	1.97	0.77	11.32	277.94	251.63	373.32	5.9878	3.52023e-27	1.76591e-24	UP
Csta2	0	0	0	21.83	7.62	7.74	5.98668	9.9314e-05	0.00118711	UP
Sorcs3	0.08	0.05	0.27	10.95	12.96	11.56	5.97388	5.19816e-05	0.000674201	UP
C3ar1	0.09	0.32	0.62	44.93	14.61	13.23	5.96041	2.67457e-05	0.000378112	UP
Col1a2	6.82	15.79	106.61	3286.59	1957.01	2538.28	5.95337	3.15985e-17	5.51532e-15	UP
Ccrl2	0.75	0.85	1.45	135.45	21.78	48.51	5.94674	3.25127e-08	9.74191e-07	UP
Cd53	0.02	0.05	1.92	74.19	22.54	34.46	5.94454	9.19171e-07	1.99916e-05	UP
Cpa3	0.05	0.03	0.02	24.95	2.03	11.39	5.9339	0.000579156	0.00521509	UP
Cd37	0.42	0.22	0.1	16.27	9.3	10.82	5.93356	6.1112e-05	0.000777703	UP
Gpr183	0.04	0.06	0.04	24.88	6.86	4.57	5.93077	0.000290908	0.00292053	UP
Rspo3	0	0.04	0.75	15.22	28.22	24.22	5.93072	1.64442e-05	0.000253191	UP
Zic1	0.01	0.01	2.77	71.22	40.66	77.12	5.9161	8.52132e-10	3.54318e-08	UP
Pcsk2	0.23	0.04	0.23	8.23	13.9	11.53	5.91085	0.000102827	0.00122159	UP
Cstdc4	0	0	0.15	10.99	14.91	8.5	5.90867	0.000108301	0.00127783	UP
Gm17971	0.65	0.12	0.36	28.55	19.83	19.11	5.90159	9.85407e-06	0.000161646	UP
Dusp1	2.03	8.08	8.29	463.49	332.18	328.33	5.90151	1.12283e-41	1.34316e-38	UP
Col15a1	0.27	1.42	3.44	86.54	53.59	108.6	5.90092	3.03429e-12	1.96609e-10	UP
Was	0	0	0.08	19.89	6.19	10.06	5.90053	0.000136159	0.00156151	UP
Fap	0.02	0.09	1.48	21.31	22.46	24.07	5.89967	9.77017e-06	0.000160439	UP
Adcy4	0.3	0.44	0.87	22.47	18.5	27.26	5.88446	1.05296e-05	0.00017135	UP
Itih6	0.2	0.08	0.07	8.62	10.17	15.19	5.88022	9.51151e-05	0.00114573	UP
Mylk	0.4	0.46	1.29	25.71	16.66	23.83	5.87489	1.02767e-05	0.000167695	UP
Slco1a4	0.03	0	0	10.63	9.59	12.57	5.87403	7.68675e-05	0.000952483	UP
Ihh	0.07	0.03	0.12	9.62	15.23	8.38	5.87087	0.000135335	0.0015532	UP
Ptafr	0	0	0.04	26.82	4.85	4.39	5.86853	0.000661881	0.00582208	UP
Fbln7	0.24	0.38	2.23	43.71	31.26	46.08	5.86252	2.72922e-07	6.73685e-06	UP
Arhgap30	0.01	0	0.08	19.71	5.09	9.54	5.85181	0.000205796	0.00219051	UP
Il2rg	0	0.02	0.44	15.41	8.05	10.95	5.84796	9.391e-05	0.00113473	UP
Tagap	0.27	0.18	0.32	21.5	4.89	8.16	5.84484	0.000278391	0.00281853	UP
Scara5	0.26	0.91	1.79	61.64	51.09	66.3	5.84296	3.24801e-10	1.43494e-08	UP
Hhex	0.11	0.11	0.4	14.23	6	14.36	5.8367	0.000130263	0.00150387	UP
Ntn3	0.29	0.3	0.45	11.05	10.16	12.07	5.832	9.20455e-05	0.00111393	UP
Gm41381	0	0	0	22.04	3.03	10.01	5.82904	0.000466922	0.00434277	UP
Col12a1	1.03	2.63	3.97	167.32	154.88	148.11	5.82731	1.11323e-22	3.68337e-20	UP
A2m	0.01	0.3	1.09	20.81	18.7	23.7	5.82485	1.32433e-05	0.000210265	UP
Emcn	0.87	0.16	6.08	142.86	89.03	178.83	5.8238	1.38493e-16	2.17546e-14	UP
Igf2	16.55	52.67	28.55	2020.52	1621.29	2237.63	5.82148	7.51144e-55	1.46013e-51	UP
Sla	0.03	0	0.03	20.75	4.78	8.1	5.80553	0.000302366	0.00301803	UP
Il10	0	0	0	26.78	1.57	6.21	5.80244	0.00128786	0.00987551	UP
Fyb	0.08	0.13	1.42	33	15.22	16.48	5.79031	2.44461e-05	0.000351351	UP
Clec4a3	0	0	0.08	17.96	6.47	8.55	5.78013	0.000208969	0.0022182	UP
Sp100	0.02	0.07	0.05	15.94	4.61	11.64	5.77927	0.000210928	0.00223595	UP
Trim30a	0.1	0.21	0.23	16.64	5.38	11.41	5.77585	0.000225999	0.00236508	UP
Cd14	0.4	0.41	6.34	239.85	35.4	68.43	5.7755	4.49968e-08	1.31779e-06	UP
Gpr65	0.02	0.04	0.08	19.41	5.2	9.44	5.76877	0.000282594	0.0028518	UP
Adrb2	0.07	0.43	1.39	32.05	13.68	16.99	5.76558	2.59588e-05	0.000368999	UP
Pde3a	0.02	0.05	0.43	14.58	6.98	10.36	5.75355	0.00016225	0.00180664	UP
Bmp3	0	0.02	0.13	12.04	9.65	8.52	5.74079	0.000147694	0.00166796	UP
Gm17024	0.15	0.16	0.65	34.39	20.47	6.96	5.73874	9.18414e-05	0.00111233	UP
Lypd2	0	0	1.23	16.47	26.89	14.53	5.72819	4.27705e-05	0.000569943	UP
Itgb2	0	0.07	0.23	18.67	5.2	7.81	5.72348	0.000361488	0.00350467	UP
Cbfa2t3	0.16	0.14	0.11	10.87	6.88	12.73	5.72152	0.000178407	0.00195325	UP
P2ry6	0.21	0.4	1.03	31.88	12.32	17.07	5.71088	3.77585e-05	0.000510594	UP
Lst1	0.7	0.48	1.99	70.21	33.74	61.53	5.70417	2.61446e-09	9.68037e-08	UP
Hp	0.03	0.06	0.48	22.19	3.55	5.91	5.70353	0.000723844	0.0062432	UP
Trem2	0.07	0.16	1.55	69.47	18.02	23.52	5.70298	6.75014e-06	0.000115735	UP
Abca9	0.01	0.02	0.54	23.19	15.65	20.39	5.69531	2.32914e-05	0.000338826	UP
Angptl1	0.36	0.25	0.43	9.71	9.38	11.29	5.6938	0.000178187	0.00195278	UP
Plac8	0.12	0.27	1.15	46.48	4.82	10.82	5.67538	0.000287847	0.00289542	UP
Gm37689	0	0	0.96	43.86	3.84	14.45	5.67482	0.000290531	0.00291864	UP
Gm21742	0.44	0.83	0	48.63	0.81	12.92	5.67336	0.00109744	0.00869841	UP
Hlx	0.08	0.21	0.86	34.82	6.54	18.29	5.65878	0.00010012	0.00119491	UP
Higd1b	0	0	0	17.24	1.91	12.14	5.65757	0.00101621	0.00820512	UP
Col13a1	0.12	0.13	0.23	14.45	5.64	9.96	5.65611	0.000266465	0.00271724	UP
Ccl6	0	0	0.42	20.31	3.11	8.09	5.65539	0.000834907	0.00699928	UP
Igf1	1.1	0.73	2.83	75.56	93.37	86.58	5.64585	1.11767e-13	9.14781e-12	UP
Nt5e	0.21	0.09	1.17	22.13	15.04	20.49	5.64411	2.97313e-05	0.000415037	UP
Tlr13	0	0	0.02	19.45	4.42	7.37	5.61962	0.000717958	0.00620623	UP
Gm57387	0.12	0.13	0.46	12.74	6.71	9.38	5.61918	0.000274923	0.00278886	UP
Gm17334	0.24	0.4	0.72	32.94	12.35	12.18	5.60995	8.10269e-05	0.000996087	UP
Il21r	0	0.03	0.09	15.57	5.56	6.88	5.5993	0.00044691	0.00417662	UP
Gsg1l	0.17	0.19	0.15	10.34	8.01	10.47	5.58849	0.000283802	0.0028611	UP
Sox7	0.1	0.09	2.27	56.37	17.32	29.47	5.58637	5.6944e-06	9.9835e-05	UP
Ifi47	0.02	0.09	0.04	18.41	4.86	5.8	5.58245	0.000703553	0.00610885	UP
Themis2	0.01	0.1	0.06	16.03	4.5	8.74	5.58178	0.00060653	0.00542701	UP
Mpz	1.2	1.14	2.26	52.2	51.57	94.73	5.57925	1.06083e-10	5.33881e-09	UP
Stfa3	0	0	0	15.07	9.22	4.48	5.57805	0.000692751	0.00603528	UP
Ppbp	0	0	0.14	14.26	2.44	13.06	5.5704	0.00125014	0.00963854	UP
Ramp2	2.83	1.34	1.73	99.92	70.13	130.97	5.56346	2.97554e-15	3.64351e-13	UP
Cntn3	0.33	0.29	1.18	23.07	14.22	17.35	5.56108	4.56475e-05	0.000603626	UP
Col2a1	232.53	226.72	144.96	11946.1	7464.83	11773.2	5.56102	4.78601e-69	7.31213e-65	UP
Ndp	0.1	0.04	0.16	9.65	9.82	6.63	5.55435	0.000392915	0.0037486	UP
Tnmd	0	0	0	11.29	9.93	6.05	5.55065	0.00045168	0.0042136	UP
Bmper	0.19	0.33	2.48	43.14	22.02	32.64	5.54781	2.27816e-06	4.45071e-05	UP
Lcp1	0.47	1.6	2.83	114.45	54.66	76.64	5.54152	7.41516e-13	5.3634e-11	UP
Socs3	6.37	18.99	17.12	913.34	567.17	560.55	5.53557	2.93416e-48	4.1481e-45	UP
Cbr2	0.04	0.24	2.57	56.8	41.96	43.92	5.5305	1.09348e-08	3.66479e-07	UP
Ncf1	0.43	0.48	0.68	29.59	10.17	14.1	5.52865	9.81441e-05	0.00117493	UP
Stk32b	0.09	0.68	0.15	14.63	20.05	15.7	5.52265	6.6971e-05	0.000841929	UP
Gm57214	0.24	0.3	0.06	9.88	5.94	10.52	5.51975	0.00043627	0.00410184	UP
H2-Pb	0	0.11	0	5.71	9.76	9.96	5.51779	0.000555392	0.00503609	UP
Pcdh12	0	0.03	0.17	10.1	4.51	11.82	5.51075	0.000542474	0.00493623	UP
Nos3	0.21	0.52	0.22	18.1	12.13	21.5	5.50822	6.41219e-05	0.000812681	UP
Trpm5	0.06	0.05	0.07	7.46	8.53	10	5.50471	0.000490462	0.00452651	UP
Enpep	0.09	0.27	3.67	31.64	86.52	53.53	5.50383	9.38966e-08	2.54388e-06	UP
Fbln5	1.58	2.1	2.3	86.22	94.84	100.77	5.50204	1.58831e-15	2.00811e-13	UP
Sp110	0	0.02	0.04	12.72	4.71	8.57	5.49885	0.000570598	0.00514697	UP
Gngt2	0.21	0.14	1.24	21.62	11.31	19.4	5.49571	6.86103e-05	0.000860451	UP
Reps2	0.31	0.5	0.93	19.46	14.66	16.56	5.49208	5.80811e-05	0.00074523	UP
Card9	0.06	0.02	0.05	14.97	5.06	6.83	5.49045	0.000725472	0.00625378	UP
Gucy1a1	0.38	1.46	0.21	28.71	6.47	17.55	5.48357	0.000182268	0.0019849	UP
Fgd5	0.2	0.28	1.27	16.96	11.36	23.2	5.47792	8.27719e-05	0.00101274	UP
Zfp385c	0.19	0.07	0.22	5.77	9.98	8.77	5.46375	0.000683213	0.00597562	UP
Ifi203	0.02	0.08	0.05	11.45	5.78	8.61	5.46181	0.000539508	0.00491787	UP
Plvap	0.59	0.76	3.29	90.56	45.97	94.53	5.4544	2.26457e-12	1.50497e-10	UP
Uba7	0.13	0.2	0.37	10.71	4.6	10.01	5.45251	0.000639016	0.0056535	UP
Mmrn2	0.38	1	0.73	34.63	20.15	37.02	5.44563	2.83082e-06	5.38167e-05	UP
Irag2	0.06	0.03	0.23	12.8	4.84	7.75	5.44413	0.000723781	0.0062432	UP
Apod	19.64	22.4	18.3	1148.73	585.45	1076.09	5.44142	5.46916e-60	1.70102e-56	UP
Col26a1	2.7	7.02	1.63	219.83	137.49	198.43	5.43943	1.14166e-25	5.07254e-23	UP
Cys1	0.02	0.43	0.54	18.37	13.55	16.71	5.43299	7.5318e-05	0.00093552	UP
Ntrk3	0.29	0.31	2.37	27.86	22.96	38.35	5.43164	4.54296e-06	8.22439e-05	UP
Epsti1	0	0	0.1	14.3	4.43	8.22	5.43006	0.000971143	0.00791107	UP
Otor	9.3	7.26	216.76	2893.54	2982.17	3356.54	5.42871	3.3339e-05	0.000458132	UP
Itga10	1.2	1.6	1.74	94.91	60.51	71.35	5.42862	2.79154e-13	2.15976e-11	UP
Cntn4	0.41	0.18	0.15	9.16	7.18	9.42	5.42337	0.000589848	0.00530216	UP
Gpr34	0.46	0.32	0.18	11.77	6.95	6.01	5.41077	0.000768976	0.00654535	UP
Ppp1r16b	0.06	0.26	0.36	8.64	4.82	10.95	5.40445	0.000791837	0.00671787	UP
Myo1f	0.01	0	0.03	11.58	6.14	7.45	5.40131	0.000764018	0.00651027	UP
Rgcc	0.69	3.43	2.2	129.99	69.4	70.19	5.39866	6.08803e-14	5.29317e-12	UP
Hk3	0.01	0.01	0.03	13.3	5.14	7.49	5.38721	0.000942613	0.00773347	UP
Ptgis	0.51	0.78	0.62	57.91	32	43.14	5.38156	1.5447e-08	4.9529e-07	UP
Crybb1	0.43	0.05	0.54	25.45	3.54	19.53	5.36573	0.00040164	0.00382012	UP
Gm7497	0	0	0.47	7.44	5.9	10.75	5.36457	0.000912015	0.0075337	UP
Chad	3.62	1.46	3.69	111.45	129.58	141.6	5.36308	4.92129e-19	1.06293e-16	UP
Gm57038	0.14	0.25	0.17	7.84	6.06	10.2	5.36025	0.000834909	0.00699928	UP
Kcne4	0.02	0.07	1.01	29.85	8.51	8.55	5.35092	0.000301359	0.00301184	UP
Siglec1	0.01	0.08	0.03	9.53	4.32	10.11	5.33136	0.00118906	0.00928732	UP
Trpc3	0.21	0.22	0.16	10.18	3.76	9.59	5.33136	0.00118906	0.00928732	UP
Evi2b	0.02	0	0.01	12.74	5.4	6.09	5.32791	0.00126487	0.00972624	UP
Thbd	0.08	0.07	2.78	56.79	28.86	39.37	5.32156	1.13001e-07	3.02457e-06	UP
Cxcl12	4.09	5.9	7.67	243.09	200.4	307.98	5.32018	4.10491e-33	3.19177e-30	UP
Angpt1	0.09	0.19	1.19	14.91	14.31	15.55	5.31933	0.00012683	0.0014697	UP
Spon2	0.04	0.1	0.38	7.77	5.76	9.42	5.29989	0.00102287	0.00824385	UP
Cd48	0	0	0.04	9.88	6.07	6.95	5.29081	0.00108154	0.00860306	UP
Gria4	0.13	0.07	1.21	14.7	12.67	16.09	5.28259	0.000146534	0.00165607	UP
Selplg	0.02	0	0	10.25	5.4	7.99	5.28049	0.00118802	0.00928732	UP
Mecom	0.03	0.05	1.46	13.67	12.12	17.98	5.27977	0.000160056	0.0017881	UP
Jun	15.78	20.49	47.85	1369.96	865.31	1099.15	5.26851	1.14162e-53	1.9726e-50	UP
Zfp36	16.84	37.04	25.89	1266.26	1042.29	887.58	5.25775	5.76271e-59	1.4936e-55	UP
Gem	0.66	1.28	2.68	111.94	57.07	32.38	5.25698	1.56779e-09	6.17233e-08	UP
D030062O11Rik	0	0	0.05	7.26	6.87	7.85	5.2521	0.00123871	0.00957893	UP
Lrrc70	0.24	0.39	0.25	8.17	5.69	8.45	5.23688	0.00128277	0.00984128	UP
Foxd1	0.04	0.13	0.67	17.29	8.7	17.36	5.22401	0.000217425	0.00228922	UP
Nrros	0.68	0.52	1.39	69.24	18.99	34.24	5.21864	4.36588e-07	1.03182e-05	UP
Gm56545	0	0	0.58	20.22	9.41	13.68	5.21665	0.000234362	0.00243932	UP
Slfn2	0.67	1.92	3.46	179.52	24.49	40.68	5.20831	4.23505e-08	1.24498e-06	UP
Zic5	0.16	0.18	1.71	26.77	19.62	28.85	5.20161	1.27705e-05	0.000203988	UP
Vit	0.03	0.09	0.92	10.41	18.61	10.72	5.19623	0.000378931	0.00363526	UP
Rcsd1	0.49	0.52	2.38	48.13	20.7	45.24	5.16757	2.62149e-07	6.50189e-06	UP
Fgl2	0.1	0.53	0.41	22.36	7.44	12.62	5.16563	0.000382918	0.00366447	UP
C130074G19Rik	1.04	0.56	3.74	76.08	48.22	101.38	5.16405	3.56362e-12	2.27122e-10	UP
Fgfr2	3.82	1.93	5.62	193.22	127.43	127.98	5.15124	1.25174e-22	3.97261e-20	UP
Aplnr	0.73	0.7	0.57	38.96	18.36	56.35	5.13419	5.30186e-07	1.22875e-05	UP
Coro1a	0.83	2.05	1.63	116.32	23.22	52.32	5.12093	1.22779e-08	4.05381e-07	UP
Prr16	0.22	0.46	2.27	26.8	21.05	23.3	5.10913	1.98726e-05	0.000296298	UP
Palmd	0.08	0.15	2.58	43.4	31.78	30.68	5.10668	4.0208e-07	9.6196e-06	UP
Rsc1a1	0	0	0.53	14.94	10.47	13.95	5.09528	0.000318733	0.00315444	UP
Aqp1	0.48	1.27	17.98	193.32	213.88	203.04	5.092	3.0522e-09	1.1221e-07	UP
Piezo2	0.08	0.02	0.6	12.4	11.18	15.41	5.07229	0.000363788	0.00352258	UP
Ebf2	0.01	0.06	0.55	15.16	11.05	12.09	5.06428	0.000357386	0.0034714	UP
Arhgap45	0.17	0.71	0.75	38.77	10.96	21.9	5.06244	4.72476e-05	0.00062214	UP
Adamts12	0.82	0.83	1.66	42.07	46.18	48.29	5.04216	3.3098e-09	1.21108e-07	UP
Itga11	0.85	0.35	0.53	19.71	24.21	24.13	5.04149	2.26845e-05	0.000330925	UP
Agtr2	0.01	0	2.66	35.96	26.48	38.1	5.01844	7.36652e-07	1.64357e-05	UP
Sned1	0.38	0.59	4.46	38.91	59.45	63.07	5.00947	3.51348e-09	1.27361e-07	UP
Csrnp1	4.19	5.08	6.79	275.44	137.87	134.22	5.00911	2.93112e-22	8.76574e-20	UP
Glt8d2	0.27	0.31	0.6	10.08	11.97	14.18	5.00808	0.000508064	0.00467232	UP
Irf1	4.44	6.67	11.31	403.46	167.39	177.33	5.00049	1.05703e-22	3.57346e-20	UP
Col24a1	0.12	0.08	1.41	10.61	10.12	15.18	4.99269	0.000517132	0.0047445	UP
Lpar4	0.32	0.26	0.86	14.48	9.5	12.12	4.98423	0.000486101	0.00449961	UP
Vstm2a	0.04	0.2	1.23	14.77	9.06	12.38	4.97507	0.0005227	0.00479024	UP
Matn4	13.14	12.37	21.31	603.68	388.77	524.55	4.97128	1.55912e-58	3.46371e-55	UP
Itih2	0.13	0.09	2.43	18.1	23.29	22.07	4.96786	5.68497e-05	0.000730636	UP
Klf4	7.86	12.2	10.48	286.17	445.4	217.14	4.96432	1.07132e-23	4.06345e-21	UP
Nr4a2	3.05	3.53	2.63	111.13	147.63	58.67	4.96222	3.1466e-13	2.41048e-11	UP
Nrk	0.07	0.02	1.66	18.42	18.86	25.59	4.95288	5.84311e-05	0.000748486	UP
Sp7	0.2	0.11	0.53	15.19	12.5	7.2	4.91365	0.000869602	0.00723552	UP
Emilin1	1.28	1.29	9.87	125.74	91.01	150.44	4.91313	1.6616e-14	1.6779e-12	UP
Gli1	0.24	1.78	1.03	35.18	22.45	36.81	4.89279	8.77321e-07	1.92196e-05	UP
Amigo2	0.49	0.31	1.09	14.38	7.96	12.33	4.88975	0.000737005	0.00633563	UP
Bpifb3	0.28	0.64	1.69	11.87	43.71	30.02	4.88513	2.10186e-05	0.000311296	UP
Lrrn4cl	0.17	0.14	0.94	9.36	11.34	12.75	4.88303	0.000822717	0.0069307	UP
Jcad	0.56	1.12	2.35	39.65	31.81	51.05	4.87785	1.56562e-08	5.00967e-07	UP
Tbx3os1	0.12	0.1	1.45	6.92	14.95	9.98	4.8756	0.00122789	0.00951893	UP
Pdgfra	0.71	0.84	8.52	135.37	73.47	119.51	4.85614	4.68648e-14	4.26195e-12	UP
Gadd45b	5.04	21.12	15.6	712.63	312.34	259.73	4.8503	1.81255e-20	4.69782e-18	UP
Ccn1	8.89	20.99	100.37	1072.66	1090.13	1393.88	4.83641	2.84633e-14	2.74928e-12	UP
Pth1r	0.73	1.86	3.07	57	61.57	55.67	4.82653	2.37768e-11	1.34456e-09	UP
Slc11a1	0.02	0.11	0.59	15.95	5.85	11.05	4.82624	0.00115116	0.00905042	UP
Fbn1	0.86	1.82	3.64	67.86	61.17	75.86	4.82219	4.84677e-13	3.58915e-11	UP
Ecscr	0.58	1.4	1.69	33	28.14	57.3	4.81867	8.39223e-08	2.33466e-06	UP
Lrrc32	0.25	0.28	2.19	31.73	12.24	15.22	4.81518	0.000185384	0.0020118	UP
Flt1	0.16	0.87	2.76	41.82	22.8	51.72	4.80963	1.67696e-07	4.31762e-06	UP
Sfrp5	1.65	1.59	5.33	28.01	109.55	110.05	4.80922	3.83548e-09	1.3763e-07	UP
Dct	0.1	0.04	2.42	5.31	28.26	19.83	4.8089	0.00090813	0.00751587	UP
Slc15a3	0.05	0.12	3.08	62.19	9.47	17.96	4.808	0.00016188	0.00180588	UP
Csgalnact1	0.05	0.14	2.2	20.72	10.58	26.05	4.80434	0.000154351	0.00173433	UP
Rbp4	0	0.11	0.59	9.47	10.06	11.59	4.78855	0.00110697	0.00875609	UP
Rgs6	0.29	0.5	0.67	10.58	8.56	11.43	4.77476	0.00106938	0.00852819	UP
Runx2	0.18	0.52	2.87	39.11	35.73	36.63	4.77241	6.26954e-08	1.77591e-06	UP
Cntn6	0.11	0.01	0.79	10.27	7.75	13.16	4.77076	0.00117242	0.00919434	UP
Nr4a3	0.91	1.13	0.52	26.7	43.48	12.02	4.76104	1.84657e-05	0.000278755	UP
Plagl1	4.51	13.78	8.59	331.5	193.41	269.1	4.74058	4.27304e-32	3.02045e-29	UP
Cd68	1.88	4.24	5.54	113.89	95.9	122.45	4.73442	1.56991e-19	3.87518e-17	UP
Zic2	0.74	1.06	9.18	73.87	74.27	139.99	4.70684	5.12763e-11	2.75916e-09	UP
Foxf2	0.36	0.51	4.33	41.22	28.02	65.48	4.70268	7.67877e-08	2.14385e-06	UP
Gja4	0.11	0.81	1.15	26.25	10.92	17.77	4.69374	0.000143849	0.00163165	UP
Ly6c1	0.2	1.24	3.82	44.7	32.53	55.32	4.6909	1.47226e-08	4.75003e-07	UP
Galnt18	0.13	0.65	1.66	32	19.11	29.79	4.69063	3.5135e-06	6.50457e-05	UP
Foxp2	0.56	1.04	0.79	30.48	23.37	28.24	4.68261	1.96622e-06	3.89513e-05	UP
Nr4a1	21.65	24.43	27.26	767.34	779.99	346.42	4.65424	6.95806e-28	3.86445e-25	UP
Ccl12	0	0	9.73	116.71	61.75	63.83	4.62765	6.36137e-07	1.43997e-05	UP
Gm44732	4.58	1.21	2.15	124.12	41.19	50.47	4.60036	1.89333e-09	7.32417e-08	UP
Car14	4.59	4.7	1.05	91.93	79.84	111.6	4.59915	2.41634e-15	3.00612e-13	UP
Rhoj	1.25	1.18	6.06	79.95	49.93	70.31	4.59118	7.56758e-12	4.56137e-10	UP
Cped1	1.48	1.34	5.48	61.7	46.68	63.88	4.57859	4.34849e-11	2.35622e-09	UP
Ctsk	0.56	0.7	20.21	157.46	171.15	168.03	4.56832	1.10798e-08	3.69823e-07	UP
Ccdc3	0.11	0.3	2.62	31.07	19.37	23.38	4.5666	1.92576e-05	0.000288142	UP
Ifi204	0.04	0.09	3.25	42.85	9.83	20.95	4.5555	0.000137967	0.00157498	UP
Pcolce2	1.99	3.02	1.32	55.48	41.36	52.46	4.54194	3.20103e-10	1.42634e-08	UP
Cxcl10	0.26	1.5	7.92	137.54	44.4	56.09	4.52437	2.04341e-08	6.40666e-07	UP
Ifi211	0.06	0.19	1.55	27.15	7.25	13.63	4.50988	0.000904914	0.00749324	UP
Nell1	0.28	2.24	4.08	47.09	44.95	47.12	4.5019	2.4633e-09	9.19719e-08	UP
Htra3	0.09	0.24	3.36	21.32	22.86	24.15	4.49722	3.33487e-05	0.000458132	UP
Pou3f4	0.67	0.91	13.91	119.97	107.23	126.63	4.4943	2.31559e-10	1.06538e-08	UP
Slc8a3	0.41	1.03	1.28	14.45	17.76	12.95	4.46729	0.000378381	0.00363446	UP
Smoc2	1.27	2.77	12.88	88.1	124.91	154.98	4.46494	1.1361e-11	6.64189e-10	UP
Nrp2	0.85	0.98	10.23	98.53	79.58	85.29	4.45087	1.05298e-11	6.1792e-10	UP
Col11a2	74.61	41.25	66.94	1857.75	923.85	1530.62	4.44554	7.90486e-42	1.0244e-38	UP
Alox5ap	1.52	1.8	2.13	90.15	16.95	37.04	4.43655	4.79122e-07	1.12149e-05	UP
Scarf2	2.32	2.02	14.57	160.96	102.61	150.83	4.4335	1.70396e-13	1.35196e-11	UP
Il6ra	0.31	0.32	2.25	22.42	8.47	15.27	4.42909	0.000830374	0.00697254	UP
Bmp5	0.17	0.57	8.29	68.22	65.02	58.91	4.42774	4.58783e-09	1.6105e-07	UP
P4ha3	4.1	4	5.02	79.23	98.1	107.72	4.40882	6.13573e-16	8.36989e-14	UP
Ppp1r15a	13.19	20.59	18.47	526.93	300.07	346.31	4.4084	1.02593e-39	1.06362e-36	UP
Lcp2	0	0.03	1.54	24.11	8.72	10.88	4.39918	0.0010539	0.00842202	UP
Fmnl1	0.74	1.01	0.45	27.75	7.43	12.38	4.39797	0.000840177	0.00703586	UP
Slc1a2	0.73	1.27	0.63	23.44	20.75	21.4	4.37497	1.53413e-05	0.000238097	UP
Nfkbid	2.55	2.1	2.24	110.66	30.38	20.36	4.37197	1.01074e-06	2.17399e-05	UP
Sfrp2	3.08	3.53	4.01	75.35	78.49	81.62	4.36362	8.23633e-15	9.1488e-13	UP
Tek	2.8	1.52	1.29	47.03	28.65	55.68	4.35625	1.04763e-08	3.52635e-07	UP
Foxc2	0.19	0.31	4.62	37.19	26.95	39.26	4.35375	2.89791e-06	5.49579e-05	UP
Serping1	0.15	0.42	5.64	43.09	38.41	40.45	4.34643	1.42803e-06	2.95309e-05	UP
C430049B03Rik	0.27	0.91	1.28	14.72	10.65	16.14	4.33179	0.000533183	0.00487737	UP
Plau	1.25	1.81	6.82	148.22	37.95	25.54	4.32899	9.03682e-07	1.96823e-05	UP
Shd	1.14	1.08	1.34	20.42	18.81	23.69	4.32866	2.15518e-05	0.00031768	UP
Cd83	3.29	4.01	5.42	174.93	38.38	49.41	4.31435	5.26062e-09	1.822e-07	UP
Adgra2	1.79	2.16	15.79	144.34	96.49	158.47	4.3086	8.5799e-12	5.11211e-10	UP
Col9a3	75.58	64.84	84.46	1956.71	1078.28	1703.26	4.29986	9.40406e-69	7.31213e-65	UP
Zeb1	0.23	0.58	4.43	41.3	24.9	33.79	4.27638	5.77945e-07	1.31783e-05	UP
Tnfaip3	2.78	6.7	5.84	209.77	42.93	86.51	4.27588	2.01547e-10	9.356e-09	UP
Hfe	0.6	0.65	1.85	42.46	14.74	25.55	4.27513	5.56131e-06	9.78326e-05	UP
Srgn	1.47	2.11	26.01	333.95	86.14	136.45	4.26362	1.5483e-06	3.14521e-05	UP
Tbx15	0.17	0.67	1.3	13.74	10.04	15.52	4.26007	0.000741599	0.00636809	UP
Klf6	7.44	11.55	26.24	469.23	209.38	210.46	4.24553	8.81938e-19	1.85338e-16	UP
Lmo2	1.62	0.68	3.85	57.37	30.43	53.35	4.24397	3.49128e-09	1.26853e-07	UP
Fgfr4	2.16	1.86	3.06	52.79	35.11	51.46	4.23623	7.60776e-10	3.20235e-08	UP
Kctd12	13.95	8.25	38.51	457.2	311.88	402.19	4.23564	2.46096e-21	6.83399e-19	UP
Bgn	10.19	42.66	121.82	959.99	1025.72	1164.41	4.22451	6.24512e-12	3.86924e-10	UP
Hmgcs2	1.83	2.01	1.41	16.75	33.43	46.83	4.22374	3.29294e-06	6.16971e-05	UP
Col6a2	2.56	6.88	30.52	268.35	227.05	255.94	4.22259	8.13617e-13	5.83067e-11	UP
Ddr2	0.17	0.27	8.31	57.64	40.11	48.07	4.2132	4.96408e-06	8.90385e-05	UP
Epas1	1.81	3.21	9.24	98.19	61.92	109.46	4.21092	6.44233e-14	5.56581e-12	UP
Pdgfrb	1.83	4.9	9.75	145.78	61.66	121.52	4.20783	3.70514e-14	3.42968e-12	UP
Acp5	0.99	0.59	3.6	41.45	44.22	27.29	4.20422	1.95705e-07	4.9567e-06	UP
Alpl	1.61	1.82	4.54	57.15	64.13	47.91	4.20199	1.30169e-10	6.35779e-09	UP
Pim1	9.53	10.5	4.39	262.89	103.57	119.5	4.19712	1.20611e-14	1.27593e-12	UP
Tnfaip8l2	0.32	0.55	0.53	18.64	6.74	13.02	4.19496	0.00124009	0.00958478	UP
Col1a1	7.98	19.57	67.34	797.09	424.3	498.98	4.18241	1.45466e-13	1.16605e-11	UP
Rasip1	1.64	2.36	1.53	48.11	21.03	47.99	4.18206	9.02832e-08	2.45883e-06	UP
Col6a3	0.97	3.06	11.38	84.29	76.58	112.83	4.17936	6.36574e-12	3.91279e-10	UP
Cd74	1.84	4.36	7.93	200.89	27.01	45.51	4.16998	5.26452e-07	1.22375e-05	UP
Mme	1.59	1.91	4.21	47.99	42.67	56.04	4.14468	3.22606e-10	1.43338e-08	UP
Rrad	0.49	0.82	2.42	26.38	16.76	11.04	4.12443	0.000200623	0.0021494	UP
Myc	3.57	6.13	6.41	120.62	95.69	73.9	4.12292	6.85557e-16	9.27052e-14	UP
Evi2a	1.61	1.35	1.42	43.2	16.35	17.27	4.12235	2.39625e-05	0.000345358	UP
Rasd1	0.62	1.66	0.87	27.43	22.72	23.41	4.12163	5.32556e-06	9.43255e-05	UP
Gnb4	0.9	1.19	7.66	86.69	33.96	59.17	4.11936	3.1035e-08	9.37136e-07	UP
Lgals9	2.7	4.93	2.34	71.07	37.07	78.61	4.11876	1.38868e-10	6.72752e-09	UP
Junb	26.52	72.74	70.33	1225.8	872.06	894.28	4.08721	4.95218e-34	4.27841e-31	UP
Nkx6-1	0.45	0.62	3.77	30.68	28.29	26.53	4.08454	3.07205e-06	5.8048e-05	UP
Nbl1	5.81	13.09	36.21	414.05	238.2	293.96	4.0843	2.98154e-17	5.35267e-15	UP
Clec11a	1.36	1.89	1.56	25.87	34.01	26.14	4.07132	1.54264e-06	3.13999e-05	UP
Gm57221	0.47	2.02	0.53	8.51	29.86	10.13	4.06918	0.00107999	0.00859514	UP
Cspg4	0.75	2.49	6.76	58.87	38.53	73.92	4.06014	1.43582e-09	5.71059e-08	UP
Cd34	2.54	4.84	14.58	137.76	83.53	170.78	4.0538	2.86557e-14	2.75077e-12	UP
Calcrl	0.12	0.62	1.52	24.24	11.09	17.32	4.04653	0.000208313	0.00221427	UP
Irx1	0.41	0.79	2.6	24.79	17.6	25.38	4.04591	2.08084e-05	0.00030907	UP
Trf	1.52	12.99	24.35	300.58	132.16	221.91	4.03287	1.32714e-12	9.25489e-11	UP
Cdkn1c	34.01	25.2	23.94	418.35	502.43	499.37	4.02778	3.76772e-32	2.79009e-29	UP
Fes	0.76	1.06	1.81	32.07	14.04	23.48	4.01917	1.8874e-05	0.000283311	UP
Peg3	21	16.72	15.63	354.09	232.33	347.67	4.01717	9.82633e-36	8.98878e-33	UP
Gadd45g	7.4	19.89	12.83	359.71	171.13	149.7	3.9953	2.22836e-16	3.3003e-14	UP
1700020L24Rik	1.04	1.18	1.01	20.61	7.82	21.76	3.97985	0.000274343	0.0027848	UP
Tgfbi	4.88	6.41	67.21	450.94	269.66	463.13	3.97495	1.91099e-07	4.85586e-06	UP
Slc40a1	0.92	0.88	5.53	59.57	30.8	39.03	3.97012	8.6789e-08	2.38877e-06	UP
AU021092	0.2	3.87	0.26	15.63	12.47	38.87	3.96143	0.000910922	0.0075337	UP
Cacna1g	0.37	0.87	5.76	42.02	28.38	40.16	3.95277	1.34182e-06	2.80089e-05	UP
Naalad2	0.24	0.56	1.8	16.67	10.85	20.34	3.9466	0.000315203	0.00312385	UP
Vstm2b	0.85	0.68	1.41	13.55	16.07	18.19	3.94511	0.000200748	0.0021494	UP
Emp1	14.19	21.9	48.32	684.06	347.15	292.34	3.93441	3.83513e-18	7.54939e-16	UP
Chrdl1	2.15	2.98	2.06	38.63	34.46	38.55	3.93165	2.5308e-08	7.85559e-07	UP
Vcam1	0.22	0.69	9.95	67.89	37.39	60.69	3.92124	3.22027e-06	6.06276e-05	UP
Colec12	0.46	0.91	16.14	84.05	67.25	95.44	3.91746	1.79772e-05	0.000273278	UP
Rab3il1	3.75	4.36	6.12	90.67	55.17	77.31	3.91479	5.75558e-14	5.11491e-12	UP
Foxc1	2.84	4	9.1	80.2	63.07	107.07	3.91475	2.20636e-13	1.71556e-11	UP
Hic1	0.45	0.21	3.17	17.58	8.96	18.64	3.90719	0.0010966	0.00869617	UP
Fxyd5	1.09	5.02	23.14	174	99.09	157.05	3.90249	1.45989e-08	4.71991e-07	UP
Srpx2	0.12	0.26	3.1	15.45	12.73	17.32	3.89977	0.000852082	0.00711258	UP
Pim3	5.99	9.47	9.01	198.77	70.73	115.62	3.89773	7.29477e-15	8.34125e-13	UP
Il17d	1.74	1.09	1.11	22.37	17.77	22.72	3.89625	2.49601e-05	0.000357087	UP
Xylt1	0.71	0.78	1.93	19.72	13.54	28.3	3.88506	4.45273e-05	0.000590319	UP
Plxnd1	2.55	6.58	12.37	114.85	72.39	149.13	3.87677	2.96328e-14	2.82712e-12	UP
Gm13889	2.4	4.28	4.5	102.28	20.61	35.73	3.85931	8.6335e-07	1.89632e-05	UP
Rin3	0.8	0.92	1.75	21.77	14.12	25.06	3.85836	4.14349e-05	0.000555	UP
Mef2c	1.5	1.86	4.77	57.23	36.08	41.69	3.8423	3.49036e-09	1.26853e-07	UP
Dusp5	2.61	6.16	8.19	129.48	82.92	41.25	3.8411	7.79514e-10	3.26744e-08	UP
Eya2	2.78	0.72	2.09	33.26	21.35	37.13	3.83089	1.19141e-06	2.53109e-05	UP
Egr1	38	79.61	181.03	1026.42	1520.72	1578.54	3.82767	1.02396e-15	1.32697e-13	UP
Snai2	0.78	0.4	3.56	21.98	17.71	31.87	3.81522	4.33752e-05	0.000577013	UP
Dusp2	0.19	0.57	13.99	131.56	26.5	53.62	3.81254	0.000227695	0.00238123	UP
Tnfaip6	0.29	0.61	3.82	32.88	20.74	16.72	3.79932	5.507e-05	0.000711881	UP
Cpxm1	1.6	2.74	32	159.2	153.86	173.39	3.78504	8.42222e-07	1.86307e-05	UP
Adamts1	5.23	11.28	31.4	302.16	149.02	208.16	3.78055	1.80945e-13	1.42836e-11	UP
Bicc1	3.02	7.13	10.15	102.38	85.33	97.23	3.77893	2.88191e-16	4.18847e-14	UP
Egr2	1.6	3.98	7.31	57.18	76.36	45.78	3.77689	1.7616e-09	6.86583e-08	UP
Heph	0.45	0.45	5.4	24.95	19.07	24.07	3.77386	0.000243597	0.00252377	UP
Crispld1	2.78	1.88	6.22	56.7	41.8	56.96	3.7657	2.60833e-10	1.18257e-08	UP
Lrrn3	0.4	0.62	4.19	17.06	20.58	29.61	3.76467	8.27408e-05	0.00101274	UP
Adcy7	0.69	0.73	1.27	17.02	10.53	14.95	3.75919	0.000445743	0.00417073	UP
Maff	4.12	12.82	6.78	153.35	125.08	60.39	3.7575	1.40133e-10	6.76773e-09	UP
Eva1b	2.18	4.4	13.67	134.03	52.2	91.74	3.748	1.5313e-09	6.04398e-08	UP
Btg2	16.35	25.8	50.27	557.51	463.19	219.9	3.74455	3.18077e-15	3.83371e-13	UP
Nrp1	1.02	2.79	11.43	80.84	56.68	66.45	3.74438	1.29067e-09	5.19979e-08	UP
Apoe	67.63	58.11	308.29	2922.61	1138.22	1792.69	3.7396	3.00831e-11	1.68173e-09	UP
Tmem88	1.4	1.82	2.26	24.57	18.24	26.66	3.73743	1.05338e-05	0.00017135	UP
Pcsk5	1.52	4.94	1.89	44.97	41.11	37.78	3.71744	2.31493e-08	7.21433e-07	UP
P2ry12	0.41	0.84	1.86	20.03	9.83	11.03	3.71242	0.00108926	0.00865324	UP
Amotl2	8.74	9.73	13.95	168.72	119.73	160.11	3.69641	2.65475e-24	1.08642e-21	UP
Nfkbiz	11.17	15.94	18.64	277.48	167.58	181.06	3.69182	6.15646e-26	2.99185e-23	UP
Socs1	0.73	1.24	1.34	18.6	10.8	10.76	3.68605	0.000735474	0.00632947	UP
Bpifa1	1.03	2.49	26.83	13.65	220.55	96.58	3.68279	0.00123035	0.00953324	UP
Tm6sf1	1.36	2.34	2.67	29.79	16.96	34.24	3.68169	5.38657e-06	9.52976e-05	UP
Gpsm3	1.14	2.1	2.36	36.73	11.94	19.93	3.67909	5.60291e-05	0.000722477	UP
Gper1	1.13	0.55	1.72	31.09	10.5	14.29	3.67831	0.000288407	0.00289917	UP
Tns2	3.57	5.69	8.41	80.37	67.04	92.98	3.67803	2.21259e-14	2.17772e-12	UP
Gm56727	1.08	0.66	0.71	22.92	10.37	8.23	3.66916	0.00130051	0.00993332	UP
Fbn2	8.02	6.67	6.24	108.86	79.62	92.89	3.66459	1.41788e-16	2.20495e-14	UP
Ets1	1.81	2.08	11.41	98.98	36.24	58.63	3.63961	1.32678e-07	3.48525e-06	UP
Gm49980	3.49	2.66	3.49	30.31	45.66	38.01	3.62617	1.87118e-07	4.77029e-06	UP
S1pr3	1.47	2.77	9	80.22	34.18	51.5	3.62155	7.62711e-08	2.1371e-06	UP
Cd248	2.01	3.75	4.02	46.18	31.22	51.07	3.60523	1.20627e-08	3.99972e-07	UP
Lpl	1.04	0.95	1.73	18.87	19.12	12.37	3.60426	0.000244884	0.00253373	UP
Ildr2	0.3	0.31	4.57	19.57	16.73	23.37	3.60383	0.000747286	0.00640278	UP
Thbs3	1.91	3.84	5.6	48.75	42.56	58.57	3.60319	9.03317e-10	3.746e-08	UP
Egfl8	0.83	1.44	1.42	11.83	12.49	14.24	3.60123	0.000963555	0.00786574	UP
Ptx3	1.89	1.34	2.89	42.04	20.51	13.9	3.59926	4.21546e-05	0.000562701	UP
Cebpd	1.61	5.96	10.19	88.9	67.25	68.1	3.59411	3.50194e-12	2.2411e-10	UP
Col9a1	154.27	143.03	204.58	2530.08	1539.22	2297.14	3.58361	1.46648e-67	7.60175e-64	UP
Ltc4s	1	3.43	3.08	43.38	18.28	27.56	3.5784	4.25282e-06	7.75329e-05	UP
Jund	67.85	76.53	91.94	1533.13	769.54	699.53	3.57173	1.08854e-28	6.77113e-26	UP
Batf	0.35	0.77	2.82	24.23	13.03	11.74	3.57127	0.000624275	0.00555768	UP
Prdm5	2.1	1.31	4.41	34.59	22.18	30.39	3.56946	2.10427e-06	4.13697e-05	UP
Timp3	13.17	20.77	64.35	463.3	332.77	366.89	3.5692	1.60693e-14	1.64403e-12	UP
B3gnt9	0.68	1.28	3.54	23.06	20.62	29.22	3.56812	1.60787e-05	0.000247809	UP
Nid2	9.23	28.91	28.41	299.38	226.19	279.83	3.55805	2.20571e-22	6.72567e-20	UP
P3h3	11.69	13.96	12.55	171.47	140.67	168.77	3.55358	3.83616e-25	1.65712e-22	UP
Klf11	1.95	4.19	3.45	45.78	29.85	35.3	3.54681	7.57248e-08	2.12947e-06	UP
Prickle1	1.82	3.48	3.79	45.92	23.62	40.93	3.54258	1.43778e-07	3.74521e-06	UP
Egr3	0.38	1.66	4.79	26.74	38.64	12.53	3.54226	0.000234142	0.00243881	UP
Ifit3	2.13	1.47	1.92	32.43	7.46	24.02	3.52496	0.000296124	0.00296907	UP
Cacna2d1	0.22	0.23	4.98	23.5	15.78	17.27	3.52226	0.00120231	0.00937793	UP
Npr1	1.27	0.77	2.54	22.9	11.56	24.58	3.51507	0.000104007	0.00123467	UP
Gm56862	1.04	2.23	9.72	69.62	36.13	44.51	3.50839	6.89215e-07	1.54661e-05	UP
Mgp	81.41	196.19	511.8	2941.38	2739.42	3083.14	3.5068	2.9153e-12	1.90487e-10	UP
Rnasel	1.54	5.31	3.61	65.44	27.25	39.65	3.48759	1.02442e-07	2.75618e-06	UP
Thbs2	2.07	4.99	26.95	172.24	100.95	101.98	3.48245	4.94081e-07	1.15194e-05	UP
Cnmd	66.73	112.4	41.95	810.98	732.51	1090.93	3.47124	5.98012e-17	1.01084e-14	UP
Oc90	103.49	56.28	62.02	735.42	1077.44	734.84	3.45935	6.52256e-17	1.07907e-14	UP
AB124611	1.52	0.97	0.7	24.73	8.43	15.41	3.45303	0.00074	0.00635787	UP
Gm56769	0.29	0.74	20.37	49.7	53.94	112.03	3.45194	0.000994008	0.00805514	UP
Map3k8	0.96	1.69	3.89	45.84	15.19	19.58	3.44434	4.87815e-05	0.00064017	UP
Tgfb1i1	1.4	1.35	7.81	33.95	32.12	43.17	3.44347	6.38807e-06	0.000110134	UP
Nherf2	5.87	6.24	9.76	82.22	66.66	98.98	3.43343	6.54957e-14	5.6272e-12	UP
Wdr86	3.2	3.46	4.17	27.55	36.83	45.73	3.42751	3.27156e-07	7.94939e-06	UP
Fosl2	4.19	15	13.83	193.99	86.41	90.67	3.41197	5.72368e-11	3.05873e-09	UP
Hspa12b	0.8	0.85	2.99	18.76	15.16	21.4	3.40895	0.000135144	0.0015532	UP
Lats2	3.09	4.81	8.35	74.16	40.27	63.19	3.39524	3.23999e-10	1.43494e-08	UP
Lrrc75b	0.94	0.82	3.26	12.62	19.92	18.69	3.36526	0.000313747	0.00311364	UP
Slc7a2	0.5	1.01	3.09	17.01	11.88	13.47	3.3619	0.001251	0.0096404	UP
Pkdcc	5.33	8.52	8.23	93.86	46.09	100.56	3.36107	3.26099e-11	1.79193e-09	UP
Eng	2.54	3.64	29.81	111.97	89.98	169.38	3.36048	2.58902e-06	4.96447e-05	UP
Papss2	2.77	4.66	7	55.61	34.59	68.87	3.34505	4.19657e-09	1.48658e-07	UP
Pid1	1.18	2.2	17.13	79.58	48.06	72.04	3.34041	1.57056e-05	0.000243022	UP
Tsc22d3	11.8	10.26	18.08	189.27	89.67	150.49	3.33458	8.72502e-17	1.38452e-14	UP
Ifitm10	0.21	0.99	3.62	16.48	10.65	23.55	3.32759	0.00103315	0.00828173	UP
Antxr1	13.39	4.41	35.52	181.01	178.47	161.88	3.30628	1.09294e-08	3.66479e-07	UP
Clcf1	0.62	0.84	3.18	19.91	15.59	14.59	3.30516	0.000265432	0.00271204	UP
Mmp28	1.41	2.39	3.99	28.29	13.66	30.14	3.29402	4.50279e-05	0.00059594	UP
Cebpb	8.68	17.72	33.42	335.99	155.44	119.09	3.2939	1.4352e-10	6.84625e-09	UP
Scube2	0.95	1.54	0.94	16.5	14.48	10.74	3.29074	0.000991933	0.00804407	UP
Scube1	1.01	2.09	4.93	24.65	22.49	32.6	3.28519	1.43305e-05	0.000225561	UP
Tmem45a	0.18	0.91	4.23	14.72	13.65	19.94	3.28418	0.000926419	0.00761858	UP
Shank3	2.79	4.13	3.39	42.33	20.82	40.86	3.27943	9.40505e-07	2.03986e-05	UP
Pamr1	0.24	1.13	4.21	18.98	14.03	16.41	3.27418	0.000828724	0.00696997	UP
Col6a1	6.01	16.37	81.36	338.96	284.41	332.94	3.27234	1.47346e-06	3.02521e-05	UP
Zfp469	2.26	3.95	3.9	35.56	27.71	36.67	3.27197	3.91614e-07	9.39813e-06	UP
Ccn4	0.57	2.77	3.49	21.35	19.38	30.21	3.26724	3.36605e-05	0.0004616	UP
Fkbp7	3.63	8.38	17.24	85.24	90.25	106.25	3.26012	1.80642e-11	1.0443e-09	UP
Lama2	1.16	2.03	8.26	37.03	26.99	42.56	3.25652	5.17124e-06	9.21168e-05	UP
Ccn2	43.85	71.28	78.82	916.46	339.76	717.96	3.24917	4.03577e-20	1.01226e-17	UP
Col25a1	1.67	4.34	3.19	33.04	25.68	29.72	3.23734	1.80827e-06	3.60518e-05	UP
Cebpa	0.73	1.72	2.32	29.83	8.44	13.17	3.23468	0.00101734	0.00820574	UP
Lox	8.66	47.83	23.24	353.69	207.92	228.43	3.22401	4.78972e-10	2.06329e-08	UP
Rgs5	4.21	23.78	24.16	320.11	54.67	146.95	3.22321	3.11601e-06	5.87358e-05	UP
Rasgrp2	0.2	1.59	2.98	24.3	8.65	16.46	3.22308	0.00112908	0.00890832	UP
Selenop	42.38	32.84	115.26	830.06	410.76	570.66	3.21403	6.09271e-14	5.29317e-12	UP
Rab30	1.44	1.66	1.89	11.43	18.2	17.65	3.20425	0.000650516	0.00574181	UP
Spns2	0.83	2.13	1.62	14.85	12.92	20.23	3.20155	0.000423031	0.00398943	UP
Rab7b	0.87	2.07	3.68	46.94	9.62	11.56	3.19581	0.000959623	0.00784188	UP
Ifitm5	0.52	2.42	1.65	22.71	14.57	10.28	3.19476	0.000684189	0.00597877	UP
Wfikkn2	1.69	1.15	1.57	18.18	14.43	16.06	3.19154	0.00037439	0.00360602	UP
Abi3bp	1.04	3.57	1.31	13.43	22.69	19.59	3.18238	0.00057037	0.00514697	UP
Pitpnm2	1.59	1.41	4.68	23.96	19.12	31.44	3.16226	4.16998e-05	0.000558067	UP
Heg1	0.86	1.15	4.03	19.92	14.31	20.9	3.15063	0.000281545	0.00284675	UP
Thbs1	25.12	51.67	69	675.45	413.59	240.73	3.1436	2.23032e-12	1.48857e-10	UP
Birc3	1.41	1.42	6.58	48.26	16.97	17.42	3.14022	0.0004788	0.00444261	UP
Tmtc1	0.66	2.25	2.77	20.87	13.87	20.14	3.13383	0.000187668	0.00202951	UP
Gng11	1.97	2.97	22.93	94.09	58.63	87.99	3.12692	1.8262e-05	0.000276526	UP
Sox8	3.06	1.69	3.44	27.35	14.94	32.3	3.11745	3.64378e-05	0.000495318	UP
Psmb10	1.17	1.34	4.64	30.4	12.67	20.07	3.11236	0.000315378	0.00312385	UP
Fibin	2.1	3.92	8.18	44.59	23.9	56.02	3.09849	1.70206e-06	3.4286e-05	UP
Lyn	1.92	3.29	6.11	56.01	13.42	31.68	3.09803	6.04996e-05	0.000771526	UP
Dlc1	2.41	15.24	5.79	89.66	42.84	75.3	3.08134	1.15246e-06	2.45505e-05	UP
Nfkbia	34.21	41.96	80.3	750.93	280.35	357.99	3.07794	4.76398e-14	4.30724e-12	UP
Acvrl1	1.19	3.37	11.81	43.21	29.56	61.76	3.06973	2.67157e-05	0.00037803	UP
Cish	2.54	3.57	3.35	37.3	23.79	27.79	3.06966	3.32422e-06	6.21334e-05	UP
Slc7a5	7.3	26.6	12.66	129	72.61	218.72	3.06913	9.74666e-08	2.63143e-06	UP
Fzd9	8.12	6.2	7.81	60.74	64.1	67.05	3.06686	1.0812e-10	5.42381e-09	UP
Gm26532	4.16	5.42	7.02	56.98	61.42	18.26	3.06459	1.53751e-05	0.000238383	UP
Ifrd1	13.88	16.81	36.66	367.78	153.38	73.14	3.06386	2.97011e-07	7.27372e-06	UP
Slit2	1.17	4.94	9.34	43.19	40.82	43.15	3.06305	8.77594e-07	1.92196e-05	UP
Ier2	55.05	41.39	89.07	577.56	473.94	539.01	3.05581	1.9649e-28	1.17524e-25	UP
Pear1	1.24	2.51	20.77	92.88	42.35	71.04	3.05555	0.000142066	0.00161523	UP
Col4a1	39.22	90.3	98.98	877.47	351	771.1	3.05216	6.21699e-15	7.21496e-13	UP
Loxl4	0.97	0.8	9.49	30.15	32.9	26.34	3.04431	0.00020893	0.0022182	UP
Sertad4	4.37	6.17	4.77	47.25	35.9	46.86	3.04241	2.67149e-08	8.24292e-07	UP
Sik1	4.59	17.2	6.7	108.24	72.34	70.64	3.02901	5.48724e-09	1.89627e-07	UP
Abcg2	3.65	3.55	13	69.79	34.03	73.2	3.0182	2.10966e-07	5.31723e-06	UP
Sema6d	2	4.46	8.98	43.54	31.65	49.42	3.01655	5.34764e-07	1.23752e-05	UP
Rapgef3	0.67	0.8	4.45	18.71	12.69	17.73	3.01378	0.000625009	0.00556037	UP
Bok	1.75	1.04	3.44	25.24	8.28	18.56	3.01344	0.000937664	0.00769885	UP
Serpinf1	7.63	9.3	94.42	243.5	291.53	301.15	3.00894	8.18476e-05	0.00100538	UP
Vwa1	1.28	2.2	3.62	23.15	11.39	25.45	3.00722	0.000348485	0.00340194	UP
Sh2d3c	1.77	2.13	2.33	21.77	7.97	21.77	3.00446	0.000764845	0.00651375	UP
Adamts10	11.64	8.65	16.4	116.78	75.29	121.35	3.00352	2.67869e-14	2.60352e-12	UP
Plekhh1	15.67	17.58	11.19	2.12	1.9	1.72	-3.00349	0.000695017	0.00605163	DN
Espn	18.66	51.19	12.53	2.96	4.01	3.69	-3.00427	0.000318873	0.00315444	DN
Rasef	12.71	24.35	16.92	2.37	3.24	1.7	-3.00582	0.000265713	0.00271274	DN
Fam83f	15.08	15.67	15.18	1.67	1.93	1.61	-3.01669	0.000391955	0.00374174	DN
Cgn	29.77	37.51	33.56	3.1	5.68	3.51	-3.02659	9.44376e-07	2.04395e-05	DN
Ttc9	20.24	32.19	51.84	3.74	4.02	5.31	-3.02697	2.44202e-06	4.74106e-05	DN
Gm35162	21.71	34.54	22.63	0.48	5.01	4.92	-3.03131	0.000342734	0.00336057	DN
Minar2	44.89	51.88	89.09	5.5	9.86	6.73	-3.03389	2.90773e-09	1.07152e-07	DN
Shc4	25.37	17.4	38.47	3.45	3.53	3.39	-3.03876	1.87021e-05	0.000281545	DN
Chmp4c	8.67	12.88	18.1	1.59	2.5	1.36	-3.04013	0.00121645	0.00946323	DN
Dact2	20.86	28.53	37.78	3.49	3.84	3.62	-3.04162	2.88748e-06	5.48268e-05	DN
Mt3	104.17	139.93	125.34	10.77	18.96	15.88	-3.05389	1.37332e-14	1.43333e-12	DN
Tmem184a	30.28	26.85	32.48	2.05	5.66	3.08	-3.05939	6.89742e-06	0.00011813	DN
Ufsp1	17.95	38.86	12.59	2.62	2.14	4.45	-3.06893	0.000234505	0.00243932	DN
Otogl	21.06	22.09	32.56	1.32	6	2.08	-3.07624	9.80968e-05	0.00117493	DN
Gprin3	17.35	17.75	12.94	1.74	1.59	1.82	-3.09176	0.000339919	0.00333928	DN
Mboat1	19.04	20.53	34.52	3.31	3.46	2.62	-3.10154	1.19377e-05	0.000192178	DN
Dsg2	23.18	17.63	26.22	1.1	4.32	3.04	-3.1083	6.04749e-05	0.000771526	DN
Me1	96.71	233.11	121.62	17.55	18.22	18.76	-3.10955	2.00106e-11	1.14828e-09	DN
Cyb561	44.87	49.72	72.09	7	6.57	6	-3.1117	1.98104e-10	9.22369e-09	DN
Wfdc12	15.72	31.4	29.06	1.5	4.2	2.85	-3.11445	2.16908e-05	0.000319123	DN
Slc44a3	64.99	67.5	62.63	3.19	12.93	6.88	-3.11994	9.14419e-08	2.48604e-06	DN
Cabcoco1	29.04	32.36	21.92	1.7	4.67	2.67	-3.12126	1.46458e-05	0.000229132	DN
Crb3	46.96	54.97	44.53	2.12	11.06	4.39	-3.12981	3.62446e-06	6.68612e-05	DN
Kcna2	17.04	14.53	18	2.13	1.97	2.21	-3.13273	0.00018355	0.00199608	DN
ENSMUSG00000121482	13.59	21.08	15.49	1.6	2.42	1.52	-3.13645	0.000238933	0.00247875	DN
Dapk2	21.44	27.56	17.35	3.63	1.96	2.08	-3.15038	5.11897e-05	0.000666151	DN
Aldoc	256.28	287.46	158.33	15.76	37.85	27.95	-3.15486	1.66672e-10	7.87818e-09	DN
Klhl8	33.56	39.45	45.69	5.87	3.96	4.48	-3.15763	1.87386e-08	5.92285e-07	DN
Sgsm1	15.76	19.64	14.68	2.28	1.62	2.36	-3.17027	0.000179486	0.00196149	DN
Myo5b	15.3	23.44	14.35	0.91	3.09	1.57	-3.17643	0.000324855	0.00320343	DN
Wfdc2	395.68	389.49	747	22.18	87.34	54.57	-3.17903	1.98902e-09	7.61852e-08	DN
Prr36	46.02	30.73	15.57	2.03	5.13	4.01	-3.18369	6.47319e-05	0.000819077	DN
Kcnh2	11.4	16.41	16.74	0.93	1.88	1.72	-3.18503	0.000499726	0.00460381	DN
Ly6h	91.1	67.78	75.32	8.75	10.1	7.69	-3.19802	5.64011e-12	3.52246e-10	DN
Chchd10	171.43	118.65	142.65	10.72	21.03	16.51	-3.20378	1.87168e-13	1.47003e-11	DN
Gata3	127.58	144.98	64.39	9.67	15.15	13.62	-3.20685	1.82332e-09	7.08863e-08	DN
Klc3	31.19	31.24	48.2	2.25	6.08	3.81	-3.2222	4.85843e-07	1.13444e-05	DN
Wipf3	81.2	77.07	59.88	6.76	6.09	11.75	-3.22623	1.13008e-10	5.65078e-09	DN
Kif1a	67.81	91.99	72.66	7.09	9.93	9.26	-3.23011	2.34809e-12	1.55384e-10	DN
Amer2	20.36	24.16	8.87	1.35	3.14	2.05	-3.23073	0.000647851	0.00572753	DN
Scg5	59.07	98.14	57.21	8.35	8.99	6.88	-3.23344	4.28786e-10	1.87305e-08	DN
Cystm1	143.9	217.31	169.15	13.57	26.72	16.23	-3.25434	1.61989e-14	1.64646e-12	DN
Prom2	20.18	12.87	56.11	1.19	5.11	2.74	-3.25777	0.000215552	0.00227412	DN
Slc41a2	47.7	56.22	59.9	5.92	4.85	6.99	-3.25914	4.56039e-11	2.46245e-09	DN
Slc6a17	71.35	80.22	46.84	6.61	7.53	6.69	-3.26465	1.14636e-09	4.64244e-08	DN
Pfkp	44.57	174.75	45.8	14.18	6.07	9.91	-3.27059	2.21684e-06	4.33636e-05	DN
Kcne3	26.5	21.96	24.07	3.06	1.29	3.78	-3.2711	1.2794e-05	0.000204062	DN
Arhgef16	24.84	30.71	27.8	1.94	4.48	2.76	-3.28197	2.33361e-06	4.54761e-05	DN
Ccdc92	17.76	17.21	10.94	1.31	1.77	1.61	-3.29304	0.000471048	0.00437591	DN
Cdk18	24.53	38.37	21.43	1.68	3.77	2.65	-3.29494	9.55987e-06	0.000157755	DN
Atg3	247.33	311.2	145.32	27.18	22.09	28.33	-3.30478	2.0702e-14	2.0637e-12	DN
Hey2	57.79	83.58	42.21	9	5.81	5.11	-3.30888	7.48961e-09	2.5598e-07	DN
Ildr1	38.24	38.27	39.44	2.48	6.37	3.5	-3.31292	1.44131e-07	3.74812e-06	DN
Slc8a2	30.6	36.09	26.7	3.1	3.35	3.52	-3.32047	6.76556e-07	1.52039e-05	DN
Brip1	14.66	13.31	10.46	1.37	1.69	1.32	-3.33011	0.00114037	0.00897467	DN
Chst5	30.12	10.44	29.26	1.43	4.06	2.29	-3.33552	0.000223724	0.00234601	DN
Efhd1	221.19	220.62	234.63	15	36.1	17.4	-3.33758	5.21831e-14	4.69075e-12	DN
Hspb2	39.8	75.21	37.26	6.35	5.15	4.7	-3.33856	4.6437e-08	1.35486e-06	DN
Gm10863	56.26	18.85	44.54	1.55	6.71	3.1	-3.3613	1.49383e-05	0.000232538	DN
Skp1	2027.21	2161.57	3097.73	276.25	239.71	214.6	-3.3654	3.49701e-61	1.35955e-57	DN
Efna3	21.24	53.04	23.01	3.84	2.64	3.34	-3.36647	8.22679e-06	0.000137861	DN
Sel1l3	26.32	28.1	38.06	1.09	5.15	2.58	-3.37842	2.42702e-06	4.71782e-05	DN
Ankrd6	65.46	42.86	62.11	4.72	5.79	5.88	-3.39606	3.08501e-10	1.38656e-08	DN
Slc35a5	63.67	87.07	68.34	9.08	5.91	7.34	-3.40203	6.48632e-13	4.73562e-11	DN
Acss3	28.4	58.67	56.06	4.17	3.53	5.79	-3.40264	1.40263e-08	4.56323e-07	DN
Gpld1	26.76	34.29	64.94	2.61	4.63	3.6	-3.4045	1.34503e-07	3.52725e-06	DN
Lypd6b	17.02	21.42	12.24	1.23	2.15	1.55	-3.40757	0.000243778	0.00252396	DN
Atp1b1	208.42	603.58	443.38	38.76	42.5	40.04	-3.41274	2.08501e-16	3.11769e-14	DN
F2rl1	18.13	29.54	14.12	0.92	3.79	1.19	-3.41841	0.000229732	0.00239609	DN
Gm7336	119.08	272.43	189.3	13.62	19.43	22.59	-3.42169	5.91913e-15	6.92093e-13	DN
Cox7a1	48.07	138.03	47.46	6.32	7.24	10.05	-3.4242	1.22005e-07	3.2328e-06	DN
Rab15	99.93	140.49	136.65	10.86	14.1	11.18	-3.44327	3.28365e-19	7.50941e-17	DN
Irf6	82.84	93.47	90.44	5.7	13.12	5.9	-3.45662	1.04637e-12	7.39641e-11	DN
Mfsd2a	69.72	42.38	43.6	4.05	5.99	5.43	-3.47039	1.44766e-08	4.6901e-07	DN
Sox10	312.99	289.68	244.24	19.44	32.73	28.45	-3.47055	3.02089e-19	7.01161e-17	DN
Hmga2	11.99	17.57	71.04	3.76	2.4	3.13	-3.47553	7.996e-05	0.000986089	DN
Plekhb1	745.97	227.74	662.36	25.49	76.88	46.19	-3.47663	3.58346e-09	1.29596e-07	DN
Kdf1	39.92	38.92	27.65	1.27	5.06	3.75	-3.48672	1.3872e-06	2.8763e-05	DN
Inka2	21.52	24.44	29.31	2.8	2.3	1.92	-3.49215	2.68073e-06	5.12137e-05	DN
Cdkl2	11.77	12.51	18.91	0.83	1.93	1.23	-3.49792	0.000350015	0.00341162	DN
Dmtn	35	29.52	32.28	2.23	4.11	3.41	-3.49902	3.23214e-07	7.87821e-06	DN
Grhl1	12.58	20.64	21.37	2.15	1.65	1.31	-3.51484	7.18281e-05	0.000896468	DN
Scrn1	144.1	151.37	152.12	13.23	15.26	13.43	-3.51716	5.63108e-23	2.03649e-20	DN
Aldh1a7	34.74	134.66	34.52	8.17	5.41	5.73	-3.53653	1.34558e-06	2.80497e-05	DN
Tmem59l	16.29	25.93	12.49	1.59	1.1	1.57	-3.54229	0.000157144	0.00176063	DN
Cybrd1	126.81	192.33	52.79	9.04	11.19	13.63	-3.56348	4.76898e-09	1.66283e-07	DN
Urah	9.78	19	42.88	0.87	1.94	2.68	-3.57251	0.00010271	0.00122113	DN
Kcnj10	27.19	11.41	17.87	0.96	1.52	1.66	-3.57344	0.000167104	0.00185088	DN
Rasgrp1	15.65	13.05	17.16	0.75	1.66	1.47	-3.58335	0.000224805	0.00235576	DN
Pkp2	19.22	31.45	18.75	1.23	3.27	1.51	-3.58484	2.25683e-05	0.000329849	DN
Reep6	29.49	38.78	22.62	1.71	3.16	2.99	-3.59285	1.3079e-06	2.73376e-05	DN
Rnase1	76.36	62.23	130.43	0.75	16.41	4.26	-3.60047	5.13858e-06	9.18507e-05	DN
Inpp5j	12.5	12.36	10.52	0.81	1	0.96	-3.62803	0.000986183	0.00800424	DN
Dkk2	126.75	161.88	124.45	11.31	12.75	10.95	-3.63586	2.07679e-19	4.96864e-17	DN
Slitrk6	13.69	27.55	18.62	0.91	3.36	1.27	-3.65088	6.93134e-05	0.000867869	DN
Slc16a3	86.09	262.84	5.03	14.61	5.22	12.12	-3.65183	0.000369913	0.00356856	DN
Rtn4rl2	62.67	80.59	15.47	6.25	3.77	4.22	-3.65502	4.83779e-06	8.69739e-05	DN
Fstl3	9.3	48.06	16.16	1.95	1.76	1.88	-3.67658	0.000191469	0.00206343	DN
Akr1b8	30.99	64.26	148.31	8.45	5.1	6.03	-3.67824	1.12238e-08	3.73749e-07	DN
Padi2	189.71	157.7	198.04	7.44	23.88	11.5	-3.68325	1.57053e-13	1.25248e-11	DN
Nfe2l3	32.46	50.05	28.33	2.33	3.58	3.19	-3.68443	2.68424e-07	6.64691e-06	DN
Fam107a	341.96	130.01	303.88	11.2	31.73	18.19	-3.68948	7.53008e-11	3.90334e-09	DN
Sfrp1	420.23	459.2	393.74	28.37	43.45	30.17	-3.7129	1.47033e-27	7.62171e-25	DN
Tecta	324.58	469.56	257.87	4.7	58.33	14.7	-3.71592	1.24784e-06	2.62942e-05	DN
S100a1	1462.44	494.94	1238.47	45.05	120.41	81.46	-3.721	6.27975e-12	3.87525e-10	DN
Bspry	59.25	58.22	76.16	3.16	6.77	5.38	-3.73198	2.56662e-12	1.68412e-10	DN
Rab25	62.87	101.93	69.74	2.06	9.8	5.51	-3.7373	7.61926e-10	3.20235e-08	DN
Lin7a	13.59	22.97	12.94	2.31	0.89	1.2	-3.74237	0.000156077	0.00174993	DN
Sh3gl2	27.01	33.89	29.48	2.11	2.73	2.49	-3.75346	3.40553e-07	8.24913e-06	DN
Gm9860	30.8	21.31	26.61	1.07	4.26	1.4	-3.76833	8.01866e-06	0.000135056	DN
Tbc1d30	18.57	17.04	15.3	1.64	0.93	1.07	-3.77493	8.96951e-05	0.00108973	DN
Dmrta1	14.92	13.95	9.88	0.71	0.72	0.64	-3.80046	0.00057148	0.00515194	DN
Cblc	11.07	13.65	14.93	0.59	1.41	1.22	-3.80172	0.000405479	0.00384255	DN
Hspa2	175.65	158.05	161.39	11.07	13.1	13.22	-3.82062	5.55814e-24	2.21627e-21	DN
Fbxo2	751.37	570.08	1273.58	50.2	87.77	42.22	-3.83618	4.28656e-19	9.6609e-17	DN
Tmprss2	20.47	29.41	35.17	1.23	3.45	2.37	-3.84114	1.21731e-06	2.57908e-05	DN
Capsl	13.49	10.21	19.64	0.3	1.85	0.74	-3.85584	0.000573397	0.00516622	DN
Ccdc68	18.76	14.69	22.32	0.8	1.99	1.26	-3.86349	4.25711e-05	0.000567773	DN
Sall2	182.78	166.52	129.39	9.18	11.4	14.83	-3.86939	1.01942e-18	2.11374e-16	DN
Nmnat2	16.9	6.34	18.92	1.18	0.97	0.92	-3.87261	0.000720885	0.00622805	DN
Tmem102	17.46	21.29	17.92	0.92	1.56	0.9	-3.87266	3.96377e-05	0.000533223	DN
Mapt	10.96	16.71	15.09	1.04	0.96	1.13	-3.90862	0.000264562	0.00270672	DN
Ap1m2	78.13	93.55	93.24	2.71	10.22	4.63	-3.91778	9.1986e-14	7.77432e-12	DN
Spire2	44.93	38.52	46.67	1.69	4.84	1.55	-3.91815	3.48532e-09	1.26853e-07	DN
Galm	93.86	102.2	105.85	6.65	6.75	6.54	-3.91907	2.15744e-19	5.08338e-17	DN
Syngr3	13.24	18.89	10.69	0.67	1.23	1.34	-3.93173	0.000322564	0.00318488	DN
Sox2	58.59	59.53	38.68	3.29	5.07	3.24	-3.93185	1.21076e-09	4.89052e-08	DN
Lad1	24.93	29.29	34.18	1.65	2.46	1.64	-3.93812	2.26928e-07	5.68269e-06	DN
Faah	40.95	48.8	42.16	1.7	4.02	2.87	-3.94217	1.39853e-09	5.57656e-08	DN
Tmprss6	18.92	19.07	39.03	1.03	3.04	1.35	-3.95363	7.42391e-06	0.000126312	DN
Cryab	1200.94	1855.44	811.12	41.92	135.07	77.12	-3.95439	4.30021e-13	3.21502e-11	DN
Rec8	89.79	66.23	116.31	4.49	7.76	6.11	-3.96051	1.10272e-14	1.18265e-12	DN
Npy	92.29	115.17	351.62	9.58	11.96	12.69	-3.97365	6.26534e-13	4.59586e-11	DN
Muc15	59.61	61.88	64.78	0.94	8.4	2.67	-3.98665	9.88861e-10	4.05746e-08	DN
Il33	224.58	333.49	158.34	14.25	14.33	20.26	-3.99906	1.74779e-18	3.52985e-16	DN
Sprr1a	9.12	95.5	34.15	0.3	6.58	0.76	-4.04778	0.000649999	0.00574181	DN
Rims2	16.5	15.75	14.83	1.35	0.8	1	-4.05308	0.000121504	0.00141855	DN
Nrxn3	18.99	41.02	19.11	1.42	2.05	1.57	-4.05665	7.71032e-06	0.000130188	DN
Ppp1r36dn	16.96	26.9	19.84	0.98	2.06	0.8	-4.06267	1.45471e-05	0.000228046	DN
Inhba	25.54	40.21	30.35	2.39	2.97	1.19	-4.06461	2.32603e-07	5.80611e-06	DN
Plch1	19.06	14.39	13.7	0.66	1.22	0.66	-4.065	0.000145879	0.00165226	DN
Cfi	12.21	15.32	23.42	0.41	1.69	0.93	-4.07056	0.000173273	0.00190699	DN
Tjp3	51.86	51.02	40.46	1.52	4.48	2.71	-4.07132	9.44992e-10	3.9084e-08	DN
St6galnac2	94.18	54	93.63	3.25	6.13	5.93	-4.0735	8.24279e-13	5.87998e-11	DN
Gldc	19.79	15.12	12.28	1.47	1.37	1.25	-4.07588	0.000172737	0.00190243	DN
Cdcp1	15.71	27.55	21.75	0.95	2.48	1.49	-4.10022	1.16029e-05	0.000187175	DN
Stra6	153.53	27.86	97.71	4.48	6.22	6.79	-4.13444	2.57589e-08	7.97962e-07	DN
Gal3st4	67.11	27.76	58.2	2.06	3.54	3.25	-4.15536	8.71941e-09	2.9606e-07	DN
Dpysl5	25.16	26.08	16.07	0.72	2.32	1.4	-4.15587	1.32506e-05	0.000210265	DN
Dyrk3	14.51	19.37	16.95	1.09	1.21	0.92	-4.16282	6.4397e-05	0.000815503	DN
Lgr5	37.88	79.64	56.49	2.52	4.59	2.27	-4.17041	3.36072e-10	1.48052e-08	DN
Tectb	276.42	490.89	423.94	4.37	50.22	7.69	-4.176	1.59512e-07	4.11371e-06	DN
Kcnc3	52.99	61.48	37.69	2.97	3.49	3.04	-4.17631	4.75042e-10	2.05777e-08	DN
Tspan8	62.65	76.62	156.26	3.31	9	4.26	-4.19166	2.5549e-12	1.68353e-10	DN
Isl1	70.72	104.54	71.44	2.54	7.77	2.89	-4.19228	1.64546e-12	1.12725e-10	DN
Gal3st3	75.68	60.71	56.25	2.06	4.39	4.62	-4.22057	7.98982e-12	4.79728e-10	DN
Cep41	165.96	86.92	106.37	3.75	8.95	6.85	-4.2462	5.95303e-14	5.25998e-12	DN
Plcd4	31.35	12.44	29.5	1.07	2.15	1.35	-4.2512	1.45271e-05	0.000228046	DN
Lpar3	27.92	15.55	29.12	1.37	1.68	0.67	-4.25134	5.45972e-06	9.63724e-05	DN
Grb7	52.2	37.64	37.4	1.48	3.56	2.18	-4.25392	1.65469e-08	5.27296e-07	DN
Otog	367	367.84	417.49	7.72	39.8	11.03	-4.25765	1.28825e-12	9.02415e-11	DN
Samd12	8.61	14.65	12.85	0.32	0.67	0.81	-4.25768	0.000812095	0.00684759	DN
Tmem221	22.87	10.25	43.72	0.88	1.77	1.3	-4.27509	2.55354e-05	0.000363979	DN
Lcn2	24.39	54.38	515.94	7.8	11.4	8.97	-4.28684	3.36922e-06	6.28989e-05	DN
Smim22	29.91	38.75	113.3	1.46	5.45	2.98	-4.28873	5.70828e-08	1.63179e-06	DN
Bpifb5	21.47	19.99	59.19	1.11	2.24	1.77	-4.32056	1.38125e-06	2.87163e-05	DN
Galnt3	53.12	39.63	62.22	2.06	3.75	1.66	-4.33089	9.61377e-11	4.91789e-09	DN
Slc22a3	10.85	16.73	10.12	0.53	1.47	0.35	-4.33214	0.00074208	0.0063687	DN
Ccdc160	15.18	14.21	8.51	0.44	0.87	0.92	-4.336	0.000762149	0.00650147	DN
Pgm2l1	92.58	80.75	71.89	4.52	3.8	4.12	-4.3401	4.26247e-15	5.05997e-13	DN
Tmem30b	234.01	300.44	219.8	10.2	15.68	12.65	-4.34147	1.38245e-27	7.41324e-25	DN
Cldn6	464.77	490.01	239.07	6.34	36.41	17.73	-4.34189	1.63716e-11	9.49982e-10	DN
Prss16	11.68	17.66	7.72	0.99	0.11	0.91	-4.37348	0.000860063	0.00716765	DN
Igsf9	84.47	92	58.49	3.24	4.96	3.51	-4.37492	4.15373e-13	3.12051e-11	DN
Pls1	62.43	81.27	58	1.59	5.56	2.13	-4.38686	1.03579e-11	6.10296e-10	DN
Plet1	94.61	147.11	63.97	2.66	9.39	3.04	-4.40663	2.79095e-11	1.56686e-09	DN
Clic6	55.04	103.67	136.88	2.6	7.05	3.97	-4.41008	3.14418e-14	2.96631e-12	DN
Mgarp	12.25	65.49	1.62	1.35	1.18	2.03	-4.42596	0.000912854	0.00753492	DN
Aqp5	13.53	10.96	71.41	0.15	2.69	0.54	-4.47779	0.000117834	0.00137881	DN
Arg2	67.47	59.75	64.33	3.9	3.11	1.6	-4.49337	3.08468e-13	2.37474e-11	DN
Kcnh6	13.58	20.02	9	0.34	0.99	0.52	-4.5114	0.00045898	0.00427657	DN
Lipg	10.55	25.18	7.13	1.15	1.12	0.41	-4.52525	0.000793129	0.0067222	DN
Cyp2s1	33.99	42.27	9.39	0.75	2.31	1.2	-4.52552	2.11245e-05	0.000312269	DN
Kera	9.83	56.06	21.02	1.67	0.79	1.08	-4.52605	2.35036e-05	0.000340013	DN
Aplp1	136.41	349.02	147.64	9.1	9.26	11.04	-4.52995	3.16913e-17	5.51532e-15	DN
Marveld3	47.92	41.75	42.9	1.43	3.76	0.85	-4.5304	3.11673e-09	1.14312e-07	DN
Scd3	15.81	17.71	10.17	0.01	0.9	0.6	-4.5471	0.000339896	0.00333928	DN
Sox21	38.05	23.61	28.73	0.47	2.52	0.85	-4.56362	1.47652e-06	3.02521e-05	DN
Gm266	199.2	46.58	108.2	3.68	5.61	6.41	-4.57131	7.13773e-11	3.72479e-09	DN
Ush1c	238.66	175.65	172.46	3.83	14.38	6.87	-4.60614	4.2619e-18	8.2846e-16	DN
Prr15l	42.27	45.19	56.32	0.44	3.59	2.32	-4.60816	1.07026e-09	4.3684e-08	DN
Tmem108	62.47	43.68	31.49	1.33	2.31	3.06	-4.62485	1.24574e-08	4.08703e-07	DN
Tmod1	468.85	315.14	479.99	7.06	30.72	12.72	-4.62745	3.19194e-17	5.51532e-15	DN
Prrt3	19.48	13.44	15.2	0.5	0.86	0.87	-4.63171	0.000186816	0.00202311	DN
Mal2	49.4	66.95	50.53	1.18	3.83	2.08	-4.63647	5.31503e-11	2.85014e-09	DN
Misp	39.51	65.3	47.28	1.38	2.93	2.12	-4.72479	2.95437e-10	1.33556e-08	DN
Sema4f	80.47	38.04	60.04	2.13	2.13	2.55	-4.76575	1.24892e-10	6.16569e-09	DN
Jph4	33.43	75.36	20.69	1.33	1.79	1.99	-4.782	2.83647e-07	6.9574e-06	DN
Lmod1	60.79	44.97	50.26	1.65	2.54	1.25	-4.78258	1.33967e-10	6.51037e-09	DN
ENSMUSG00000121382	14.8	49.2	17.62	0.78	0.89	1.03	-4.85596	1.06341e-05	0.000172802	DN
A330048O09Rik	7.57	6.19	16.59	0.27	1.04	0.25	-4.87305	0.00121112	0.00942652	DN
Wfdc3	34.16	18.58	67.25	0.96	2.22	1.13	-4.91972	1.97858e-07	5.00308e-06	DN
Slc26a4	36.72	12.12	75.84	0.33	2.91	0.81	-4.92256	4.6841e-06	8.46893e-05	DN
Cdkn2b	19.58	29.54	105.3	1.99	2.31	0.89	-4.92444	1.69495e-07	4.35672e-06	DN
Ngfr	73.73	74.83	152.69	3.21	3.21	3.61	-4.94927	2.5698e-16	3.7701e-14	DN
Lrrc8e	8.37	10.03	14.72	0.34	0.63	0.36	-4.98052	0.000592156	0.00531982	DN
Ache	20.7	113.18	11.53	2.49	0.59	2.22	-4.9927	5.8499e-06	0.000102101	DN
Cpa6	36.61	26.37	30.41	1	1.22	0.69	-5.04629	3.47863e-07	8.41309e-06	DN
Bcl2l14	40.68	47.55	37	0.56	1.88	1.28	-5.05691	4.60931e-09	1.6144e-07	DN
Pnpla3	13.32	5.44	17.43	0.29	0.52	0.27	-5.07565	0.000731417	0.00629804	DN
Sgpp2	22.25	27.63	13.76	0.45	0.82	0.92	-5.09064	3.37029e-05	0.000461775	DN
Zmat4	37.01	39.18	21.86	0.77	0.98	0.84	-5.13903	4.11953e-07	9.84069e-06	DN
Crlf1	26.43	88.32	135.66	2.46	2.85	2.29	-5.14581	1.83894e-10	8.63969e-09	DN
Pex5l	72.84	65.05	63.54	2.55	1.25	2.29	-5.17316	3.95328e-13	2.9989e-11	DN
Fut2	71.16	49.51	92.78	2.45	2.19	2.1	-5.21741	3.49533e-13	2.66451e-11	DN
Sncg	24.92	179.18	164.54	3.06	2.9	3.55	-5.21908	7.7499e-11	4.00394e-09	DN
Nptx2	43.6	90.19	53.77	1.13	3.44	0.65	-5.29068	9.29442e-11	4.77021e-09	DN
Gm13782	64.11	24.95	22.78	0	3.34	0	-5.29414	5.18862e-06	9.22151e-05	DN
Or2y7	46.04	142.22	32.97	1.23	1.72	2.63	-5.29486	4.96662e-09	1.72787e-07	DN
Kcnc4	10.7	14.26	15.6	0.63	0.35	0.26	-5.30955	0.0001464	0.00165576	DN
Ptpn5	12.26	14.11	15.96	0.2	0.41	0.58	-5.34834	0.000121795	0.00142088	DN
Fgf3	8.35	7.79	5.29	0.02	0.28	0.18	-5.35077	0.00123295	0.00954858	DN
2310030G06Rik	84.36	94.88	95.34	0.82	3.69	2.15	-5.35245	1.47333e-16	2.2685e-14	DN
Slc9a4	5.29	6.82	10.01	0.04	0.34	0.28	-5.35475	0.00102366	0.00824385	DN
Foxg1	88.04	99.91	47.03	0.63	3.61	1.03	-5.37447	2.30518e-11	1.31311e-09	DN
3110039M20Rik	6.25	10.88	5.61	0	0.39	0.13	-5.46197	0.000824696	0.00694361	DN
Gm24924	5.8	7.63	10.35	0	0	0	-5.49096	0.000539	0.00491612	DN
Gm26244	5.8	7.63	10.35	0	0	0	-5.49096	0.000539	0.00491612	DN
2610528J11Rik	23.39	39.92	24.2	0.36	2.08	0.5	-5.49394	4.53007e-06	8.21062e-05	DN
Gpx2	105.39	212.47	623.24	2.07	10.52	6.1	-5.53184	3.14733e-14	2.96631e-12	DN
Gjb3	3.92	13.23	7.71	0.1	0.11	0.18	-5.55696	0.000750359	0.00642203	DN
A2ml1	7.09	7.59	9.53	0.03	0.19	0.08	-5.55714	0.000387666	0.00370534	DN
Acox2	7.8	3.41	14.57	0.06	0.26	0.15	-5.58044	0.000953996	0.00781078	DN
Gm39529	38.39	325.93	5.57	1.71	3.06	3.05	-5.62642	2.07271e-06	4.08526e-05	DN
Gm5424	6.74	13.12	6.33	0.15	0.2	0.37	-5.64608	0.00044544	0.00417073	DN
Sstr1	13.99	4.12	7.79	0.18	0.41	0.3	-5.6672	0.000658959	0.00580793	DN
Rorb	9.29	10.63	7.18	0.19	0.12	0.1	-5.70299	0.000259802	0.00266855	DN
Ces1d	22.78	25.89	119.79	0.35	1.7	0.99	-5.74495	3.13036e-07	7.64212e-06	DN
Gm37459	12.46	12.05	4.09	0.14	0.18	0.15	-5.79233	0.00040975	0.00387828	DN
Igfbpl1	8.44	12.52	8.08	0.12	0.48	0.22	-5.79536	0.000175473	0.00192847	DN
Rsph1	9.87	12.15	6.76	0.2	0.32	0.43	-5.81123	0.000174738	0.00192175	DN
Dlx1	70.13	44.02	42.61	0.75	0.93	1.31	-5.81982	2.73566e-09	1.0105e-07	DN
Jakmip2	9.09	10.23	10.84	0.14	0.32	0.32	-5.82937	0.00010808	0.0012762	DN
Prr15	114.8	125.31	141.31	2.74	2.5	1.97	-5.8403	4.13827e-21	1.12902e-18	DN
4930512H18Rik	11.41	15.95	2.22	0.07	0.05	0	-5.85296	0.000847698	0.00708715	DN
St8sia5	11.56	9.87	8.2	0.36	0.24	0.33	-5.86227	0.000128107	0.00148229	DN
Gm12602	6.8	7.56	16.51	0.18	0.21	0.14	-5.87807	0.000131166	0.00151317	DN
Ckmt1	51.63	55.83	61.26	0.86	1.12	0.95	-5.88991	1.65765e-10	7.85918e-09	DN
Gm49890	56.06	55.91	60.03	0.56	1.42	0.76	-5.92002	1.42768e-10	6.83136e-09	DN
Ikzf3	15.88	6.51	9.32	0.19	0.38	0.41	-5.96647	0.000128686	0.00148788	DN
Gm27151	7.92	13.52	12.35	0.39	0.3	0.4	-6.00417	5.54698e-05	0.00071586	DN
Prkcq	26.34	27.88	9.83	0.41	0.88	0.48	-6.01831	2.40261e-05	0.000345954	DN
Gm47865	10.73	11.16	13.39	0.33	0.16	0.27	-6.05269	3.54435e-05	0.000483069	DN
Cst6	6.7	8.4	23.42	0.16	0.32	0.12	-6.10449	7.59216e-05	0.000941512	DN
Aldh1a3	1357.67	962.28	917.72	6.83	27.87	12.47	-6.13767	1.94768e-30	1.31688e-27	DN
Gm44170	45.53	20.88	0	0	1.24	0.05	-6.16077	0.00129807	0.00992091	DN
Spock1	344.72	549.68	230.3	1.14	10.58	4.33	-6.16576	1.68414e-19	4.09219e-17	DN
Gm20275	20.44	7.46	10.27	0.31	0.27	0.32	-6.18429	6.83417e-05	0.000857774	DN
Kcnj6	15.95	18.43	2.89	0	0.1	0.08	-6.20941	0.00018534	0.0020118	DN
Tmem54	10.72	15.32	13.16	0.16	0.24	0.2	-6.21213	1.68535e-05	0.000258302	DN
Car9	60.37	429.16	5.2	1.52	2.87	1.94	-6.22905	6.34396e-05	0.00080469	DN
Dpp6	65.34	46.79	34.64	0.47	0.67	1.06	-6.30685	5.21498e-08	1.51302e-06	DN
Padi4	4.39	7.81	34.3	0.19	0.32	0.04	-6.33238	0.000124663	0.0014489	DN
Cckbr	19.06	15.79	5.75	0.02	0.14	0.08	-6.34727	3.95711e-05	0.000532788	DN
Dnajc6	15.23	12.93	14.99	0.39	0.46	0.25	-6.35865	7.51232e-06	0.000127677	DN
Gm44893	17.8	18.69	6.02	0	0.21	0	-6.41151	3.07609e-05	0.000427109	DN
Hpdl	36.26	15.16	43.07	0.71	0.49	0.42	-6.50821	1.60391e-06	3.24349e-05	DN
Dlx2	133.59	87.46	46.94	0.96	1.42	1.44	-6.6214	6.87008e-11	3.59719e-09	DN
Gpx6	33.61	112.55	46.31	0.44	1.06	0.71	-6.65948	2.76355e-08	8.51009e-07	DN
Wnt7a	40.5	16.84	48.47	0.46	1.25	0.34	-6.66765	7.14596e-07	1.59665e-05	DN
Plekhd1	21.59	20.19	15.28	0.47	0.38	0.41	-6.78753	1.05373e-06	2.25711e-05	DN
Lce6a	23.57	26.13	8	0	0	0	-6.8436	4.15241e-06	7.58803e-05	DN
Apoa4	240.55	42.91	158.93	0.23	3.04	0.97	-6.84943	9.60466e-12	5.70084e-10	DN
Gm56451	38.47	11.54	10.4	0	0	0	-6.91778	6.57503e-06	0.000112982	DN
Otol1	615.12	698.13	1064.7	2.35	10.6	3.63	-7.13694	1.86782e-48	2.90464e-45	DN
Tspo2	19.6	42.34	9.79	0	0.35	0.22	-7.13733	1.37106e-06	2.85427e-05	DN
Fgf10	131.52	200.46	85.51	0.3	1.94	0.72	-7.2116	9.46134e-14	7.95315e-12	DN
Sprr2b	9.34	39.63	34.89	0	0	0	-7.27646	3.87555e-07	9.3151e-06	DN
Gabrg3	30.97	33.76	18.19	0.04	0.13	0.06	-7.33833	7.61258e-08	2.13688e-06	DN
Shox2	29.52	40.96	13.29	0.1	0.17	0.1	-7.36721	2.13957e-07	5.37383e-06	DN
P2rx2	235.74	332.62	219.89	1.01	2.9	1.47	-7.38171	1.01385e-23	3.94159e-21	DN
Tmprss3	162.38	139.71	173.53	0.71	1.12	0.9	-7.38842	7.89676e-17	1.27919e-14	DN
Sult4a1	32.5	34.84	43.44	0.48	0.22	0.44	-7.69786	1.88478e-09	7.30927e-08	DN
Gipc2	29.29	37.53	44.44	0.1	0.4	0.26	-7.70587	1.94011e-09	7.468e-08	DN
Sprr2a2	9.02	56.53	86.61	0	0.06	0.14	-8.09783	3.05581e-08	9.26334e-07	DN
Cdkn2a	15.25	20.67	128.58	0	0	0.06	-8.16088	5.59933e-08	1.60952e-06	DN
Cyp1a1	13.02	16.24	156.38	0	0.04	0.02	-8.3064	1.27515e-07	3.361e-06	DN
Ivl	79.49	93.64	22.43	0.08	0.09	0.15	-8.60001	7.42482e-10	3.14614e-08	DN
Fetub	25.01	57.13	183.94	0.15	0.08	0.05	-8.87162	2.46538e-10	1.12103e-08	DN
Wfdc18	54.96	83.8	354.54	0.14	0.32	0	-9.75992	1.40235e-12	9.73572e-11	DN

## Sheet: Supple #2
Supplemenraty Table 2. Summary of biological processes involving in transcriptional differences in MACS
GO Term	GO description	Log P-value	Log q-value	Genes	Hit gene number
GO:0007507	heart development	-31.1141	-26.9366	APC,BMPR1A,BMPR2,CDH11,COL2A1,COL3A1,COL5A1,COL11A1,ATF2,EDNRA,ELN,EYA1,GJA1,HIF1A,HNRNPU,INHBA,LOX,MMP2,PDGFRA,PDGFRB,PKD2,RB1,ROCK1,SFRP2,SNAI2,SOX11,TGFB2,TGFBR1,TWIST1,NRP1,ADAMTS1,MATR3,EMILIN1,HEY2,NIPBL,PDCD4,SETD2,ADAMTS9,BMI1,FBN2,KRIT1,COL8A1,ITGAV,THY1,SIRT1,MME,PPP3CA,SULF1,IGF1,DDX5,LRP6,JAK2,CUL3,UPF2,PRRX1,TBX15,FREM1,COL1A1,COL1A2,NTRK2,ADAM10,FUT8,EIF2S2,THOC2,COL6A1,COL12A1,HDAC…	74/-
GO:0048705	skeletal system morphogenesis	-21.3864	-18.2881	BMI1,BMPR2,COL1A1,COL2A1,COL3A1,COL11A1,ATF2,EYA1,FBN2,MATN1,MMP2,PDGFRA,SOX11,STC1,TGFBR1,TWIST1,CHSY1,NIPBL,SETD2,BPNT2,IFT80,FREM1	22/227
GO:0043062	extracellular structure organization	-27.8896	-24.3661	ADAM10,COL1A1,COL1A2,COL2A1,COL3A1,COL5A1,COL5A2,COL8A1,COL11A1,COL12A1,ELN,FMOD,GPM6B,LOX,MATN1,MFAP4,MMP2,MMP3,DDR2,PDGFRA,SFRP2,TGFB2,TGFBR1,ADAMTS1,POSTN,EMILIN1,SULF1,ADAMTS9	28/274
GO:1901699	cellular response to nitrogen compound	-23.4908	-20.2164	APC,ATRX,COL1A1,COL1A2,COL3A1,COL5A2,COL6A1,ATF2,CRK,DHX9,EDNRA,GJA1,HDAC2,IGF1,INHBA,JAK2,MMP2,MMP3,NPM1,NTRK2,DDR2,PDGFRA,PKD2,RAP1A,RB1,RPS6KB1,STC1,TAF1,CUL3,PHIP,PDGFD,CPEB2,BMT2	33/632
GO:0007167	enzyme-linked receptor protein signaling pathway	-22.5646	-19.3871	APC,BMPR1A,BMPR2,COL1A1,COL1A2,COL3A1,ATF2,CRK,DDX5,FMOD,FUT8,IGF1,INHBA,JAK2,LOX,MMP2,NCK1,NTRK2,DDR2,PDGFRA,PDGFRB,PTN,SFRP2,TGFB2,TGFBR1,NRP1,SULF1,SIRT1,PDCD4,PHIP,ERBIN,PDGFD	32/622
GO:0008380	RNA splicing	-21.2296	-18.166	DDX5,DHX9,FMR1,HNRNPH1,HNRNPU,MBNL1,MFAP1,PNN,TIA1,TAF15,PRPF4B,PPIG,ZRANB2,QKI,CIR1,RBM39,DDX46,THOC1,PTBP3,MBNL2,RBM6,MPHOSPH10,HNRNPR,SYNCRIP,IVNS1ABP,SRSF10,PSIP1,SF3B1,MTREX,ZNF638,HTATSF1,TRA2A,CRNKL1,LARP7,LUC7L2,LUC7L3,PRPF39,PRPF38B,RNPC3,PRPF40A,THOC2,CWC22,PTBP2,RBM25,PAXBP1,SREK1,CWF19L2,PPP4R2,HNRNPA3,ZNF326	50/411
GO:0034248	regulation of amide metabolic process	-20.4948	-17.4934	DDX3X,DHX9,EIF5,FMR1,HNRNPU,IGF1,IREB2,MTIF2,NCK1,NPM1,NTRK2,DNAJC3,ABCE1,ROCK1,RPS6KB1,SH3BGRL,SSB,TPR,CSDE1,EIF5B,SYNCRIP,TNRC6A,IMPACT,EIF2A,SARNP,CPEB2,DHX36,YTHDF3	28/508
GO:0003170	heart valve development	-18.0423	-15.3833	APC,BMPR1A,BMPR2,CDH11,ELN,RB1,ROCK1,SNAI2,TGFB2,TWIST1,MATR3,EMILIN1,HEY2,ADAMTS9	14/73
GO:0030278	regulation of ossification	-17.7728	-15.1394	ATP2B1,BMPR1A,BMPR2,FBN2,GJA1,GPM6B,HIF1A,MATN1,DDR2,PTN,SOX11,TWIST1,CHSY1,NIPBL,SETD2,TENT5A	16/122
GO:0007423	sensory organ development	-16.8365	-14.2718	ADAM10,BMPR2,COL2A1,COL5A1,COL5A2,COL8A1,COL11A1,EDNRA,EYA4,EYA1,FBN2,GJA1,HDAC2,HIF1A,INHBA,NTRK2,PDGFRA,PDGFRB,SOX11,TGFB2,TGFBR1,THY1,TWIST1,NRP1,HEY2,NIPBL	26/579
GO:0006325	chromatin organization	-16.3947	-13.8507	ATRX,BMI1,ATF2,EYA4,EYA1,NR3C1,HDAC2,HMGB1,HNRNPU,JAK2,NPM1,PRKAA1,RB1,ARID4A,RNF2,SNAI2,SMARCA1,TAF1,TOP1,KDM6A,DEK,SMARCA5,OGT,PHF14,TLK1,USP15,USP16,NFAT5,PSIP1,CBX3,MTF2,KDM4C,SMC5,PSME4,TASOR,SIRT1,RYBP,SF3B1,SUZ12,KAT6B,NIPBL,ZZZ3,EPC2,DNAJC2,SETD2,KMT5B,RLIM,ARID4B,MPHOSPH8,MBTD1,PBRM1,LRIF1,MIER1,NFKBIZ,HMGN5,SMC6,NAA50,TDRD3,CHD6,SLF1,JMJD1C,ZNF445	62/791
GO:2001237	negative regulation of extrinsic apoptotic signaling pathway	-14.4688	-12.1528	COL2A1,DDX3X,EYA4,EYA1,IGF1,ITGAV,RPS6KB1,SFRP2,SNAI2,TGFBR1,NRP1,SGK3,PHIP	13/100
GO:0080135	regulation of cellular response to stress	-14.467	-12.1528	XIAP,BRAF,CRK,DDX5,DHX9,EYA4,EYA1,FUT8,HMGB1,NCK1,NPM1,PRRX1,PTN,CXCL12,SFRP2,SNAI2,SPP1,STK3,TGFB2,THY1,TOP2B,TWIST1,UBE2V2,USP1,DEK,PJA2,USP15,THOC1,ACTR2,INPP5F,PUM2,UFL1,SIRT1,EPC2,CHORDC1,DNAJC2,PDCD4,SETD2,USP25,PNPLA8,KMT5B,MBTD1,PBRM1,SUPT20H,PPP4R3B,TAOK1,MARCHF7,SLF1,NCOA7,PPP4R2,SPRED1,UBXN2A,SVIP	53/661
GO:1901652	response to peptide	-13.667	-11.4086	APC,COL1A1,COL3A1,CRK,EDNRA,GJA1,HDAC2,IGF1,INHBA,JAK2,LRP6,MMP2,MMP3,DDR2,RB1,ROCK1,RPS6KB1,SIRT1,PHIP,ERBIN,CPEB2	21/465
GO:0040007	growth	-13.4188	-11.1809	ATRX,BMPR1A,COL3A1,ATF2,EDNRA,GJA1,IGF1,MATN1,DDR2,PPP3CA,PTN,SFRP2,STC1,TGFB2,NRP1,POSTN,HEY2,NIPBL,IMPACT,IFT80	20/422
GO:0006413	translational initiation	-13.4068	-11.1738	DDX3X,EIF1AX,EIF2S3,EIF5,MTIF2,ABCE1,EIF3A,EIF3J,EIF2S2,EIF5B,EIF2A	11/68
GO:0045787	positive regulation of cell cycle	-13.0318	-10.8456	ATRX,DDX3X,HNRNPU,IGF1,LRP6,NPM1,DDR2,PDGFRB,RB1,RDX,RPS6KB1,TGFB2,TPR,CUL4B,CUL3,ADAMTS1,THOC1,PHIP	18/335
GO:0043484	regulation of RNA splicing	-12.8404	-10.6923	CLK1,DDX5,FMR1,HNRNPH1,HNRNPH2,HNRNPU,MBNL1,NCL,NPM1,TIA1,QKI,RBM39,PTBP3,MBNL2,SRSF10,ZNF638,TRA2A,LARP7,SUPT20H,CLK4,CWC22,PTBP2,RBM25,UPF3B,ZNF326,RBM12B	26/184
GO:0007369	gastrulation	-12.7772	-10.6371	BMPR1A,BMPR2,COL6A1,COL8A1,COL11A1,COL12A1,EYA1,INHBA,ITGAV,MMP2,SFRP2,CUL3,TASOR,SETD2	14/169
GO:0045596	negative regulation of cell differentiation	-12.528	-10.4112	BMPR1A,BMPR2,COL5A1,COL5A2,HMGB1,HNRNPU,IGF1,INHBA,ITGAV,PPP3CA,PTN,RB1,SFRP2,SNAI2,SOX11,TGFB2,TGFBR1,THY1,TWIST1,NRP1,SIRT1,HEY2,SUZ12,PDCD4	24/734

## Sheet: Supple #3
Supplemenraty Table 3. Summary of biological processes involving up-regulation in the SHH agonist and Wnt inhibited group (G3)
GO Term	GO description	Log P-value	Log q-value	Genes	Hit gene number
GO:0060322	head development	-19.0479	-17.3505	AGTR2,ALDH1A3,APOD,AQP1,ATP1A2,BMP5,CMA1,COL1A1,COL2A1,COL3A1,COL4A1,CSF1R,CX3CR1,DCT,DLX1,DLX2,EGR2,FCGR2B,FGF10,FGFR2,FOXG1,FOXC1,GDF10,GLI1,IHH,INHBA,ISL1,ITGAM,KCNA2,KCNE1,KRAS,NPY,NR4A2,PDGFRA,POU3F4,S100A1,CXCL12,SELENOP,SLC1A2,SOX2,SSTR1,ZEB1,CLDN5,TYROBP,WNT7A,ZIC1,ZIC2,BTG2,NRP2,NRP1,SLIT2,DLC1,SOX21,GNB4,STRA6,CSRNP1,P2RY12,TMEM108,FAT4,SEMA6D,CRISPLD1,MGARP,MFSD2A,SHANK3,PRICKLE1,CNTN4…	68/777
GO:0034330	cell junction organization	-11.6013	-10.3198	APOE,C1QA,C1QB,C1QC,C5AR1,CDH5,COL4A1,CSF1R,CX3CR1,DSG2,F2RL1,GABRG3,GJA4,ITGAM,KCNJ8,MAPT,CLDN11,PECAM1,PKP2,SLC8A2,SLC8A3,SNAI2,SNCG,CLDN5,WNT7A,FZD9,NRP1,CLDN6,RAMP2,DLC1,PLXND1,TJP3,CNTN6,GRHL1,TREM2,HEG1,TMEM108,SVEP1,SLITRK6,SHANK3,ESAM,CHRDL1,PRICKLE1,CNTN4	44/533
GO:0000902	cell morphogenesis	-11.7717	-10.4784	CDH5,CSF1R,EFNA3,EGR2,FGFR2,FOXG1,FOXD1,FOSL2,GATA3,NCKAP1L,IHH,ISL1,LAMA2,MATN1,MEF2C,NBL1,NDP,NGFR,NTN3,NR4A2,PLS1,PRKCQ,PSMB10,CXCL12,SH3GL2,SPI1,WNT7A,LST1,NRP2,NRP1,SLIT2,NRXN3,KLF2,SEMA4F,LPAR3,LATS2,CNTN6,ROBO4,RAB25,HEG1,IGSF9,TNMD,SOX17,TMEM108,SEMA6D,SLITRK6,MFSD2A,SHANK3,PRICKLE1,CNTN4,DACT2	51/680
GO:0044057	regulation of system process	-12.4295	-11.0896	ADRB2,AGTR2,APOE,AQP1,ATP1A2,ATP1B1,CACNA2D1,CAV1,DAB2,DSG2,EGR2,EPAS1,FGF10,GPER1,GUCY1A1,NR4A1,IGF1,INHBA,KCNE1,KCNH2,KCNJ8,NOS3,NPR1,PKP2,PTAFR,SLC8A3,TNF,TRPC3,WNT7A,NR4A3,CACNA1G,KCNE3,ABCC9,KCNH6	34/560
GO:0140352	export from cell	-10.8917	-9.66017	AQP1,ATP1A2,ATP1B1,CCR1,COMP,ENG,FGF10,FOXD1,GATA3,NR4A1,IL6,INHBA,KCNA2,KCNE1,KCNH2,KCNJ8,LYN,PCSK5,PLEK,SLC8A2,SNCG,WNT7A,NR4A3,LIN7A,ABCG2,SCRN1,KCNE3,AP1M2,RASGRP1,CORO1A,KCNE4,SLC40A1,SMPD3,RAB25,SCIN,TSPAN18,PRICKLE1,MILR1,ILDR2,WIPF3	40/474
GO:0043583	ear development	-9.90674	-8.74633	ALDH1A3,BMP5,CEBPA,CEBPD,COL2A1,ESRRB,FGF10,FGFR2,FOXG1,GATA3,MAF,PLS1,POU3F4,SOX2,ZEB1,TECTA,ZIC1,LGR5,LIN7A,TBX18,USH1C,HEY2,CYTL1,STRA6,SLITRK6,OTOL1,BMPER,OC90	28/221
GO:0030029	actin filament-based process	-10.6998	-9.48284	AIF1,AQP1,FMNL1,CACNA2D1,ELN,DMTN,FGF10,HCLS1,NCKAP1L,KCNE1,KCNH2,KCNJ8,KRAS,LCP1,MYO1F,MYO5B,PDGFRA,PDGFRB,PKP2,PLEK,PLS1,RAC2,SELE,TF,TMOD1,TNF,TYROBP,WAS,CACNA1G,ARHGAP25,KCNE3,ABCC9,USH1C,DLC1,CORO1A,FAM107A,KCNE4,LMOD1,AMOTL2,RHOJ,ESPN,ANTXR1,SPIRE2,SCIN,FGD5,WIPF3	46/612
GO:0008285	negative regulation of cell population proliferation	-36.8007	-34.286	ACVRL1,AIF1,APOD,APOE,BMP5,CAV1,CD86,CD33,CDH5,CDKN1C,CDKN2A,CEBPA,CEBPB,CSF1R,DAB2,DUSP1,ETS1,FAP,FCGR2B,FGF10,FGFR2,FLT1,LRRC32,GATA3,GPLD1,GPER1,IHH,IL1A,IL1B,IL6,IL10,INHBA,INPP5D,IRF1,LGALS9,LYN,MEF2C,MYC,NELL1,NGFR,NOS3,NPR1,OGN,SERPINF1,PTH1R,RBP4,CCL2,SFRP1,SFRP2,SFRP5,SNAI2,SOX2,TGFB1I1,THBS1,TNF,TNFAIP3,TYROBP,ZBTB16,KLF4,ADAMTS1,DLC1,P3H3,LILRB4,CNMD,TNS2,TREM2,DLL4,TNMD,MMRN2,SCIN,CCL…	71/-
GO:0120035	regulation of plasma membrane bounded cell projection organization	-8.70643	-7.63921	APOE,KIF1A,BMP5,CAV1,DAB2,DMTN,F2RL1,FCGR2B,FES,GATA3,IFRD1,LYN,MAPT,MT3,NTRK3,DDR2,SERPINF1,PLS1,RAC2,CXCL12,SFRP1,SFRP2,SHOX2,SPOCK1,WAS,WNT7A,SCARF1,NRP1,KLF4,SLIT2,USH1C,SEMA4F,PLXND1,TBC1D30,LPAR3,PPP1R16B,INPP5J,TREM2,P2RY12,SEMA6D,MGARP,MFSD2A,SHANK3,MBOAT1	44/656
GO:0008544	epidermis development	-8.34485	-7.30976	CST6,CSTA,CCN2,DCT,EMP1,FGF10,FGFR2,FOSL2,GLI1,IL1A,INHBA,IVL,KRT15,NGFR,PLS1,SPRR1A,WAS,LGR5,KLF4,USH1C,SOX21,LATS2,GRHL1,SOX18,NFKBIZ,SVEP1,SLITRK6,KDF1,LCE6A	29/334
GO:0098773	skin epidermis development	-3.95218	-3.27958	FGF10,FGFR2,INHBA,NGFR,LGR5,KLF4,SOX21,GRHL1,SOX18,NFKBIZ,KDF1	11/114
GO:0030198	extracellular matrix organization	-40.871	-38.0552	CAV1,CMA1,COL1A1,COL1A2,COL2A1,COL3A1,COL4A1,COL8A2,COL9A1,COL9A3,COL10A1,COL11A2,COL12A1,COL13A1,COL15A1,COMP,CTSK,CTSS,ECM2,ELN,ENG,FOXF2,FOXC1,FOXC2,FMOD,IBSP,CCN1,IHH,LCP1,LOX,MATN1,MATN3,MFAP4,MMP9,DDR2,PDGFRA,PTX3,SFRP2,TGFBI,TLL2,TNF,TPSAB1,COL14A1,VTN,MATN4,ADAMTS1,RAMP2,FBLN5,EMILIN1,NID2,ABI3BP,SMPD3,CSGALNACT1,SMOC2,VWA1,MMP28,ADAMTS20,ADAMTS12,ADAMTS10,LOXL4,PRICKLE1,COL24A1,AIF1,HCLS…	77/-
GO:0040017	positive regulation of locomotion	-50.1207	-46.5401	ACTA2,AIF1,ANGPT1,AQP1,C3AR1,C5AR1,CAV1,CD74,CDH5,CCR1,COL1A1,CSF1R,CX3CR1,DAB2,ETS1,FGF10,FOXC2,FLT1,GATA3,GPLD1,GPER1,NCKAP1L,IGF1,CCN1,IL1A,IL1B,IL6,IL6R,CXCL10,KDR,LGALS9,LYN,MMP9,MYLK,NOS3,DDR2,P2RY6,PDGFRA,PDGFRB,PECAM1,PLAU,PTAFR,PTPRC,RAC2,CCL4,CCL24,CXCL12,SELE,SELP,SNAI2,SP1,TEK,TF,THBS1,TLR4,TNF,TNFAIP6,VTN,WNT7A,NR4A3,NRP2,NRP1,CCN4,SLIT2,ADAMTS1,CORO1A,ADGRA2,SRPX2,TREM2,RHOJ,JCAD,GP…	77/620
GO:0001501	skeletal system development	-37.9828	-35.3963	ACP5,ACAN,ALPL,BGN,BMP3,BMP5,RUNX2,CDKN1C,CHAD,CMKLR1,COL1A1,COL1A2,COL2A1,COL3A1,COL10A1,COL11A2,COL13A1,COMP,HAPLN1,CCN2,DLX1,DLX2,ENG,FBN1,FBN2,FGFR2,FOXC1,FOXC2,FOSL2,GATA3,GDF10,GPLD1,IGF1,CCN1,IHH,LEPR,MATN1,MATN3,MEF2C,MGP,MMP9,DDR2,OGN,PCSK5,PDGFRA,PTH1R,PTPRC,RBP4,SFRP1,SFRP2,SHOX2,SNAI2,TBX15,ZEB1,TEK,TGFBI,THBS3,WNT7A,ZBTB16,CCN4,PAPSS2,CLEC3A,LRRC17,CNMD,CYTL1,SMPD3,CSGALNACT1,OTOR,XY…	77/500
GO:0006954	inflammatory response	-49.9425	-46.464	A2M,AGTR2,AIF1,ALOX5AP,C1QA,C3AR1,C5AR1,CD14,CD68,CEBPB,CCR1,CSF1R,CX3CR1,CYBB,S1PR3,FCGR1A,FCGR2A,FCGR2B,FOS,FOSL2,GATA3,GPER1,CXCL3,NR4A1,HP,IFI16,IL1A,IL1B,IL6,IL6R,IL10,CXCL10,ITGAM,ITGB2,KCNJ8,LGALS9,CD180,LYN,MAPT,NDP,PF4,PPBP,PTAFR,PTX3,S100A8,CCL2,CCL4,CCL15,CCL24,SELE,SELP,SLC11A1,THBS1,TLR4,TNF,TNFAIP3,TNFAIP6,TYROBP,VCAM1,AOC3,CD163,LY86,TLR7,IL17D,TREM2,NFKBIZ,CLEC7A,SCUBE1,NFKBID,NLR…	74/562
GO:0050865	regulation of cell activation	-46.455	-43.3567	ACTA2,AIF1,APOE,PRDM1,CAV1,CD86,CD33,CD74,CEBPA,CEBPB,GPR183,EGR3,FCER1G,FCGR2B,FGF10,LRRC32,GATA3,GPER1,NCKAP1L,HFE,HLA-DQA1,HLX,IGF1,IGF2,IHH,IL1A,IL1B,IL2RG,IL6,IL10,INHBA,INPP5D,IRF1,JUNB,LGALS9,LYN,MEF2C,NOS3,DDR2,PDGFRA,PLEK,PTPRC,RAC2,CCL2,SELP,SFRP1,SPI1,THBD,THBS1,TLR4,TNF,TNFAIP3,TYROBP,VAV1,VCAM1,ZBTB16,LAPTM5,NR4A3,SOCS1,CD83,BATF,FGL2,LILRB4,EMILIN1,CORO1A,CLCF1,TREM2,NFKBIZ,CLEC7A,N…	74/628
GO:0030097	hemopoiesis	-48.1825	-44.9081	ANGPT1,RUNX2,CD34,CD74,CDKN1C,CEBPA,CEBPB,CEBPD,CSF1R,CTSK,GPR183,EGR1,EPAS1,MECOM,EVI2B,FCER1G,FCGR2B,FGFR2,FLI1,FOS,FOSL2,GATA3,HCLS1,NCKAP1L,HHEX,HLX,IFI16,IL2RG,IL6,IL6R,IL10,INHBA,IRF1,JUNB,KDR,LEPR,LYN,MAF,MEF2C,MMP9,NDP,NOTCH4,PDGFRA,PLEK,PTPRC,RAC2,SFRP1,SFRP2,SLC8A3,SNAI2,SPI1,TEK,TF,TLR4,TNF,TYROBP,VAV1,VCAM1,ZFP36,ZBTB16,FZD9,SOCS1,CCN4,SOCS3,CD83,KLF4,KLF2,BATF,CLCF1,CLEC4E,TREM2,DLL4…	78/680
GO:0001568	blood vessel development	-57.9537	-53.9734	ACTA2,ACVRL1,APLNR,ANGPT1,APOD,APOE,AQP1,PRDM1,CAV1,CD34,CDH5,COL1A1,COL1A2,COL3A1,COL4A1,COL8A2,COMP,CSPG4,CCN2,EGR1,EGR2,EGR3,ENG,ENPEP,EPAS1,FAP,FGF10,FGFR2,FOXC1,FOXC2,FLT1,GPLD1,NR4A1,CCN1,IHH,JUNB,KCNJ8,KDR,LEPR,LOX,MEF2C,MYLK,NDP,NGFR,NOS3,NOTCH4,PDGFRA,PDGFRB,PECAM1,PTPRB,CCL2,SFRP2,TEK,TGFBI,THBS1,TIE1,WNT7A,NRP2,NRP1,SOCS3,SLIT2,ABCC9,CALCRL,RAMP2,RAPGEF3,PLXND1,ADGRA2,SRPX2,SOX18,ROBO4…	79/526
GO:1901342	regulation of vasculature development	-37.9892	-35.3963	ACVRL1,APLNR,AQP1,C3AR1,C5AR1,CD34,CDH5,CMA1,CX3CR1,CYBB,ENG,ETS1,FOXC1,FOXC2,FLT1,HHEX,IL1A,IL1B,IL6,IL10,CXCL10,KDR,NOS3,NPR1,SERPINF1,PF4,PTGIS,CCL24,CXCL12,SFRP1,SFRP2,SP1,SP100,TEK,THBS1,TIE1,CLDN5,TNF,TNFAIP3,NRP1,KLF4,ADAMTS1,RAMP2,KLF2,RAPGEF3,CNMD,EMILIN1,PLXND1,ADGRA2,RHOJ,JCAD,TNMD,BMPER	53/361
GO:0032103	positive regulation of response to external stimulus	-42.5093	-39.536	AIF1,ALOX5AP,C3AR1,C5AR1,CAV1,CD14,CD74,CEBPA,CEBPB,CCR1,CSF1R,CTSS,CX3CR1,ETS1,FABP4,FCGR1A,FCN2,FGF10,NCKAP1L,IFI16,IL1B,IL6,IL6R,CXCL10,KCNJ8,KDR,LGALS9,LPL,CD180,LYN,NFKBIA,PDGFRA,PDGFRB,PLAU,RAC2,S100A8,CCL4,CCL24,CXCL12,SPI1,THBD,THBS1,TLR4,TNF,TNFAIP3,TYROBP,VAV1,VTN,SCARF1,NRP1,CCN4,SLIT2,LY86,EMILIN1,CLEC4E,TLR7,TREM2,GPSM3,CARD9,NFKBIZ,CLEC7A,P2RY12,MMRN2,COLEC12,TRIM5,CLEC6A,NLRP3	67/557

## Sheet: Supple #4
Supplemenraty Table 4. Differentially expressed genes in Control (G0) vs. the SHH agonist and Wnt inhibited group (G3)
Gene_id	G1_1	G1_2	G1_3	G3_1	G3_2	G3_3	G3 vs G1 log2FoldChange	G3 vs G1 pvalue	G3 vs G1_PI padj	Status
Postn	0.14	0.13	0.07	425.44	441.64	410.84	10.7245	3.01477e-19	1.27303e-17	UP
Cdh11	0.43	0.76	0.36	149.43	150.21	150.74	8.25643	1.48653e-11	3.17609e-10	UP
Otogl	0.39	0.4	0.24	69.15	71.3	68.99	8.11194	2.17898e-10	3.99341e-09	UP
Rian	0.06	0.16	0.23	64.04	69.1	62.45	8.01225	4.68897e-10	8.1626e-09	UP
Scg2	0.12	0.19	0.02	61.42	67.57	63	7.98954	5.47999e-10	9.42151e-09	UP
Aspn	0	0	0	56.5	60.09	56.98	7.8392	1.5766e-09	2.56922e-08	UP
Col3a1	2.45	2.19	2.49	513.8	518.18	512.98	7.55546	1.32626e-34	1.19259e-32	UP
Dlk1	0.07	0.12	0.25	40.91	41.64	42.83	7.38153	3.79761e-08	5.15378e-07	UP
Fbn1	0.11	0.11	0.1	33.44	33.38	30.03	6.99012	5.26194e-07	5.77427e-06	UP
Mfap4	0.67	0.41	0.46	61.48	63.77	59.11	6.96662	5.80165e-08	7.5773e-07	UP
Mme	0.79	0.44	0.49	57.57	58.31	58.38	6.88566	9.18559e-08	1.15272e-06	UP
Cd248	0.3	0.16	0.4	30.87	29.13	28.79	6.88054	1.04071e-06	1.06467e-05	UP
Kctd12	0.22	0.6	0.36	52.28	52.09	52.67	6.73721	2.18199e-07	2.55362e-06	UP
Meg3	0.08	0	0.05	27.7	23.48	29.41	6.72571	2.90967e-06	2.68994e-05	UP
Col26a1	0.16	0.06	0.36	25.61	25.66	26.93	6.70803	2.99366e-06	2.75476e-05	UP
Col15a1	0.41	0.14	0.47	24.78	25.55	28.25	6.70761	3.03527e-06	2.78545e-05	UP
Pla2g4a	0.33	0.37	0.34	24.14	24.25	24.79	6.59406	5.94857e-06	5.12413e-05	UP
Colec12	0.18	0	0.08	23.08	24.41	23.69	6.55408	7.5458e-06	6.40291e-05	UP
Igsf10	0.03	0.08	0.04	23.29	23.22	22.54	6.51304	9.5861e-06	7.93488e-05	UP
Col12a1	0.41	0.35	0.37	22.42	22.36	22.84	6.4703	1.22808e-05	9.99332e-05	UP
Pdgfra	0.36	0.28	0.38	20.44	20.79	19.99	6.33537	2.648e-05	0.000199984	UP
Ccdc148	0.56	0.46	0.41	40.14	39.05	39.03	6.32547	2.19738e-06	2.09178e-05	UP
Lrrc17	0	0	0	20.29	19.96	20.44	6.3114	3.00979e-05	0.000224191	UP
Cfh	0.11	0.27	0.04	19.68	20.11	18.78	6.2875	3.45559e-05	0.000252434	UP
Fbn2	0	0.03	0	18.82	18.21	19.14	6.21173	5.18724e-05	0.000362817	UP
Slc39a10	0.5	0.42	0.43	19.26	18.3	17.63	6.18611	5.96444e-05	0.000410289	UP
Col1a1	3.07	3.26	3.67	339.78	313.31	332.58	6.1706	4.06882e-34	3.58142e-32	UP
Otor	2.5	0.66	0.59	124.14	119.86	129.51	6.09393	2.81023e-14	8.14968e-13	UP
Podn	0.11	0.16	0.1	17.32	17.9	16.32	6.07749	0.000106194	0.000679978	UP
Tmem119	0.21	0.44	0.23	17.54	15.68	15.53	6.04889	0.000123279	0.000777776	UP
Ddx3y	0.29	0.38	0.47	16	17.08	16.81	6.04811	0.000121654	0.000769124	UP
Ddr2	0.2	0.15	0.13	16.35	16.76	16.38	6.01938	0.000141034	0.000870078	UP
Amy1	0.21	0.4	0.27	17.11	14.89	17.1	6.01891	0.000142714	0.000877413	UP
Dkk2	0.4	0.38	0.43	15.82	16.15	16.54	6.0188	0.000140875	0.000869956	UP
Col1a2	5.15	4.89	4.9	428.47	409.97	424.84	5.94266	1.2443e-45	1.63711e-43	UP
Lama4	0.26	0.26	0.32	15.27	15.58	15.11	5.92824	0.000221187	0.00128229	UP
S1pr3	0.49	0.37	0.3	15.27	15.8	14.52	5.92824	0.000221187	0.00128229	UP
Rbm12b2	0.46	0.37	0.43	16	14.18	16.36	5.92774	0.000223981	0.00129548	UP
Eln	0.57	0.72	0.12	56.55	52.37	55.6	5.91225	2.44454e-07	2.83698e-06	UP
Ptn	6.13	8.17	9.43	613.69	627.92	634.35	5.89658	4.94906e-67	1.14553e-64	UP
Col6a2	2.09	2.42	1.75	165.07	162.54	158.58	5.89	5.87843e-19	2.44915e-17	UP
Mfap2	1.44	0.81	0.62	80.29	79.05	78.4	5.85088	4.0952e-10	7.20929e-09	UP
Srpx	0.05	0.3	0.18	15.41	13.26	14.57	5.83042	0.000356357	0.00195184	UP
Tbx15	0.13	0.16	0.21	14.27	14.26	14.43	5.79683	0.000409801	0.00219739	UP
Ankrd12	0.39	0.48	0.32	13.9	13.86	14.01	5.79683	0.000409801	0.00219739	UP
Gm15344	0	0	0	11.69	14.62	15.28	5.7959	0.000427078	0.00227517	UP
Crispld1	0.05	0.02	0.05	14.58	12.8	13.09	5.76269	0.000489284	0.00256525	UP
Thbs4	0	0	0	12.96	13.84	12.99	5.72663	0.000566933	0.00291609	UP
Tagln	2.17	1.29	1.21	96	94.89	95.82	5.71242	3.38225e-12	7.84318e-11	UP
Sgk3	0.14	0.23	0.32	12.65	13.28	13.21	5.68991	0.000663745	0.00333984	UP
Pid1	0.23	0.26	0.25	10.59	15.09	12.7	5.68964	0.000702165	0.00350634	UP
Abi3bp	0.18	0.35	0.24	12.51	14.12	10.6	5.65372	0.00080974	0.0039504	UP
Cacna1g	0.12	0.1	0.13	12.88	12.32	13.01	5.65224	0.000785673	0.00384801	UP
Nrp1	0.19	0.21	0.41	12.35	12.61	12.52	5.6521	0.000785626	0.00384801	UP
Krit1	0.46	0.48	0.85	24.73	24.3	24.9	5.65207	6.51318e-05	0.000444368	UP
Frem1	0.04	0.05	0.02	11.85	12.94	11.77	5.61417	0.000927612	0.0044502	UP
Clmp	0.03	0.25	0.34	11.07	13.03	12.89	5.61326	0.000941519	0.00450883	UP
Rerg	0.17	0.03	0.35	11.67	11.97	11.95	5.57443	0.00109115	0.00513295	UP
Bclaf3	0.29	0.4	0.32	12.41	11.65	11.75	5.57443	0.00109115	0.00513295	UP
Jrkl	0.42	0.35	0.25	12.11	12.03	11.96	5.57443	0.00109115	0.00513295	UP
Slf1	0.15	0.18	0.24	11.24	13.11	11.57	5.57429	0.00110717	0.00519768	UP
Ace2	0.16	0.06	0.16	11.65	11.64	11.45	5.53438	0.00129833	0.00595298	UP
Pcdh18	0.17	0.25	0.46	11.92	11.68	11.33	5.53438	0.00129833	0.00595298	UP
Smc5	0.42	0.3	0.26	11.27	12.22	12.21	5.53342	0.00129823	0.00595298	UP
Ccdc66	0	0.36	0.31	11.45	11.99	12.25	5.53342	0.00129823	0.00595298	UP
Fstl1	3.58	4.62	3.41	252.38	256.83	251.28	5.53131	2.09609e-30	1.57825e-28	UP
Gpm6b	0.66	0.97	1.16	62.44	62.9	62.93	5.51651	8.30343e-09	1.26412e-07	UP
Ogn	1.48	1.4	1.41	60.54	65.97	60.35	5.50919	9.3078e-09	1.39662e-07	UP
Ranbp6	0.28	0.39	0.5	11.02	12	10.73	5.4922	0.00153926	0.00688096	UP
Haus3	0.25	0.38	0.36	10.88	11.59	10.76	5.4922	0.00153926	0.00688096	UP
Bicc1	0.3	0.4	0.28	11.66	10.48	11.77	5.49152	0.00156386	0.00697845	UP
BC002059	0.22	0.24	0.31	10.98	12.33	10.34	5.44976	0.0018468	0.00798028	UP
Agtr2	0	0	0	11.16	12.28	9.68	5.44976	0.0018468	0.00798028	UP
Zfp935	0.26	0.35	0.27	10.32	12.87	10.29	5.4496	0.00189847	0.00817397	UP
Snai2	0.41	0.28	0.32	11.05	11.23	11.32	5.4489	0.00181923	0.00787894	UP
Fmod	0.36	0.35	0.41	10.13	11.67	11.06	5.44874	0.0018471	0.00798028	UP
Zfp950	2.26	0.29	0.42	20.02	45.99	51.9	5.42985	2.59409e-05	0.000196506	UP
Cwf19l2	0.48	0.37	0.28	10.83	10.67	10.38	5.40515	0.00217519	0.00913257	UP
Myo9a	0.25	0.41	0.21	10.65	11.02	9.93	5.40515	0.00217519	0.00913257	UP
Col5a2	1.02	0.9	1.05	57.45	56.59	55.25	5.3631	3.10219e-08	4.26856e-07	UP
Thoc1	0.22	0.67	0.29	18.26	21.35	20.91	5.34897	0.00025495	0.00145508	UP
Luc7l3	2.29	2.27	2.41	102.12	104.24	101.89	5.22882	5.19043e-14	1.45135e-12	UP
Gm15446	0.4	0.58	0.49	12.83	26.28	13.64	5.17211	0.000748097	0.00368855	UP
Col6a3	0.85	0.68	0.72	48.5	50.1	48.96	5.16162	1.57101e-07	1.8899e-06	UP
Col11a1	4.82	4.76	5.14	242.36	246.28	241.52	5.15185	4.28638e-31	3.32767e-29	UP
Muc15	4.59	4.54	4.45	224.93	229.73	221.96	5.14254	6.72537e-29	4.69611e-27	UP
Prrx1	1.37	1.18	1.04	48.11	47.7	48.36	5.1319	1.97467e-07	2.33064e-06	UP
Col6a1	3.69	3.69	3.05	185.03	170.19	172.36	5.12919	8.2013e-23	4.32523e-21	UP
Septin7	3.21	3.47	2.86	140.34	143.22	143.25	5.11164	5.19238e-19	2.17784e-17	UP
Acta2	1.94	1.3	0.77	61.1	61.41	61.32	5.06345	4.67767e-09	7.30827e-08	UP
Gm4724	1.15	0	0	16.27	18.96	14.28	5.05871	0.000863515	0.00418336	UP
Manea	0.42	0.69	0.49	15.78	16.31	15.61	5.02768	0.000913287	0.00439214	UP
Esf1	0.41	0.71	0.42	14.4	16.83	17.26	5.02688	0.000938262	0.00449496	UP
Pdgfrb	0.34	0.59	0.53	29.25	29.68	29.46	5.00477	4.67173e-05	0.000330645	UP
Rev3l	0.63	0.46	0.46	15.42	15.61	15.55	4.99704	0.00102966	0.00487393	UP
Tgfb1i1	0.21	0.3	0.72	17.05	13.36	17.2	4.99667	0.00107957	0.00508425	UP
Lztfl1	0.45	0.28	0.86	15.24	16.12	15.35	4.96644	0.00115703	0.00539617	UP
Mir100hg	10.59	12.08	12.41	489.15	515.67	485.29	4.95883	2.27874e-61	4.38185e-59	UP
Ttc14	1.29	0.87	1	43.78	41.15	42.05	4.9508	7.92001e-07	8.38207e-06	UP
Inhba	0.2	0.42	0.76	14.94	14.77	15.33	4.93457	0.00129711	0.00595298	UP
Bgn	18.54	19.06	18.07	779.63	793.44	760.59	4.92831	1.91354e-94	6.29404e-92	UP
Tmem47	0.73	0.94	0.72	40.9	43.43	39.64	4.91645	1.02175e-06	1.04765e-05	UP
Cpxm1	1.3	1.22	1.29	39.54	44.41	37.31	4.88157	1.40397e-06	1.39383e-05	UP
Zfp942	0.49	0.73	0.49	15.01	14.87	13.43	4.86992	0.00166622	0.00730995	UP
Matn2	0.27	0.13	0.65	14.93	13.97	14.2	4.86928	0.00165216	0.00725337	UP
Zfp280d	0.93	0.76	1.26	39.16	39.17	39.81	4.84444	1.68061e-06	1.64109e-05	UP
Gria3	0.57	0.5	0.27	14.26	14.03	13.98	4.83503	0.00185877	0.00801959	UP
5530601H04Rik	0.04	0.19	0.61	14.04	13.63	13.96	4.83503	0.00185861	0.00801959	UP
Golm2	1.7	1.38	0.99	49.46	53.44	51.32	4.80517	5.87658e-08	7.65916e-07	UP
Cep57	1.12	0.41	1.18	25.27	24.32	26.14	4.77889	0.000144595	0.000885059	UP
Col8a2	0.7	0.56	0.45	24.69	25.11	24.84	4.77409	0.000145282	0.000887962	UP
Arid4a	0.67	0.32	0.48	12.91	13.21	13.77	4.76414	0.00238474	0.00988947	UP
Igip	1.43	1.28	1.44	36.62	38.12	34.86	4.74375	3.47836e-06	3.1596e-05	UP
Ift74	0.14	0.6	0.73	22.05	26.48	25.19	4.7344	0.000179423	0.00106877	UP
Odr4	0.38	1.21	0.64	22.9	24.42	25.67	4.73411	0.000176786	0.00105826	UP
Cntn1	0.65	0.75	0.64	36.15	35.63	37.23	4.72996	3.73347e-06	3.36685e-05	UP
Arrdc3	1.42	1.27	1.33	36.09	36.41	36	4.71685	4.08802e-06	3.66018e-05	UP
Pnn	2.29	2.44	2.04	70.63	72.96	72.32	4.71683	9.12272e-11	1.77609e-09	UP
Dse	1.31	0.95	1.39	34.64	36.38	36.27	4.70331	4.48121e-06	3.97239e-05	UP
Gm10557	0.51	0.48	1.35	27.66	17.29	22.95	4.63865	0.000338829	0.00187308	UP
Matn1	0.95	0.65	0.38	22.29	22.09	24.04	4.63202	0.000281398	0.00158575	UP
Smc3	1.49	1.36	1.17	33.16	34.02	34.05	4.62005	7.80818e-06	6.61209e-05	UP
Far1	1.79	1.64	2.05	67.78	65.42	69	4.61996	3.28534e-10	5.83287e-09	UP
Sfrp2	0.68	0.59	0.18	23.06	20.46	22.92	4.58916	0.000345928	0.00190474	UP
Adam10	5.1	5.94	4.91	169.8	180.22	176.4	4.58526	7.88581e-24	4.30414e-22	UP
Rnd3	2.58	2.78	2.3	84.77	89.18	87.8	4.57977	9.96091e-13	2.47124e-11	UP
Trim23	0.94	1.24	0.28	22.23	21.11	22.17	4.56735	0.000374392	0.00203314	UP
Pnisr	4.29	3.63	3.17	119.74	118.15	114.58	4.55091	1.38538e-16	4.87772e-15	UP
Lox	2.02	2.39	1.71	62.46	66.56	62.84	4.54701	8.61609e-10	1.44748e-08	UP
Ccar1	1.12	1.22	1.06	31.65	32.19	32.01	4.54692	1.25382e-05	0.000101763	UP
Mctp1	1.48	1.99	1.43	44.35	42.23	42.33	4.54516	5.83127e-07	6.33783e-06	UP
Atrx	0.85	1.08	0.68	31.38	31.87	31.69	4.53168	1.382e-05	0.000111515	UP
Fmr1	1.05	1.37	0.8	30.1	32.14	32.91	4.53134	1.39677e-05	0.000112561	UP
Col2a1	3.67	3.73	3.4	114.73	111.51	116.82	4.51323	2.97798e-16	1.02823e-14	UP
Adgrl3	0.81	0.88	0.87	30.57	29.87	32.34	4.50082	1.68317e-05	0.000133033	UP
Rnpc3	1.39	0.61	1.08	32.66	31.32	28.3	4.48643	1.94596e-05	0.000151826	UP
Emilin1	1.29	1.19	1.05	32.06	30.98	28.87	4.48608	1.8872e-05	0.000147888	UP
Dsel	1.06	0.89	0.64	29.07	30.79	31.74	4.48503	1.87043e-05	0.000146665	UP
Prpf39	1.76	1.34	1.25	39.84	41.36	41.1	4.47861	1.00393e-06	1.03192e-05	UP
Nek1	1.41	1.63	1.59	50.19	52.61	49.08	4.47233	5.20743e-08	6.86579e-07	UP
Ktn1	1.73	1.43	1.49	41.46	41.25	39.2	4.46718	1.12278e-06	1.13817e-05	UP
Iigp1	0.63	1.83	1.6	49.1	50.96	48.09	4.43379	7.57053e-08	9.67526e-07	UP
Acbd5	1.99	1.93	1.34	48.12	51.04	48.85	4.43368	7.51473e-08	9.62362e-07	UP
Ssb	5.92	4.72	3.83	141.79	152.11	148.87	4.43107	2.60358e-20	1.18335e-18	UP
Dmd	1.25	1.01	1.29	28.89	28.83	30.07	4.42116	2.74525e-05	0.00020658	UP
Matr3	8.32	5.56	4.83	182.35	190.17	184.74	4.42079	6.65864e-25	3.7659e-23	UP
Sh3bgrl	9.27	10.43	9.02	266.69	280.37	270.62	4.41522	4.91507e-36	4.79948e-34	UP
Dpysl3	1.06	1.26	1.1	30.52	27.8	27.64	4.40532	3.10704e-05	0.000230202	UP
Impact	1.02	0.77	0.66	30.6	27.24	28.75	4.40501	3.12338e-05	0.000231275	UP
Dnm1l	1.85	2.8	2.27	68.58	67.76	66.3	4.40395	3.13036e-10	5.5826e-09	UP
Enpp2	0.75	0.68	0.42	20.19	18.81	19.27	4.40314	0.000755949	0.00372579	UP
Islr	2.23	1.14	1.93	48.48	48.59	45.9	4.38686	1.20866e-07	1.47963e-06	UP
Rock1	0.61	0.47	0.51	18.29	19.1	19.85	4.38342	0.000830883	0.00404172	UP
Thbs2	0.32	0.55	0.79	19.59	18.75	17.74	4.37812	0.000843503	0.00409435	UP
Zfp638	0.57	0.51	0.5	18.84	19.09	19.03	4.37782	0.000835651	0.00406096	UP
Golim4	1.27	0.7	1.05	28.17	28.48	28.55	4.37111	3.71197e-05	0.000269901	UP
Ppil4	1.13	1.34	1.41	27.31	27.94	29.99	4.37073	3.75564e-05	0.000271968	UP
Itm2a	3.19	2.76	2.82	86.43	81.81	85.65	4.36555	1.67741e-12	4.05531e-11	UP
Gja1	0.58	0.86	0.9	27.29	28.56	27.81	4.3542	4.13422e-05	0.000296249	UP
Psip1	2.83	1.99	2.99	72.46	72.65	78	4.34838	4.08359e-11	8.29931e-10	UP
Srp54a	3.25	4.07	3.5	99.09	99.25	106.53	4.3392	1.35466e-14	4.08983e-13	UP
Lrif1	1.03	0.87	1.36	32.08	25.62	24.57	4.33813	5.06371e-05	0.000354971	UP
Dhx36	1.36	1.27	1.1	27.51	27.38	26.92	4.31965	5.0553e-05	0.00035458	UP
Pcm1	0.79	0.83	0.79	27.8	27.05	26.87	4.31965	5.0553e-05	0.00035458	UP
Rbm39	7.66	8.07	8.12	215.42	222.99	216.11	4.31515	2.36179e-29	1.69655e-27	UP
Sp3	1.91	2.15	1.37	45.7	46.77	42.84	4.31212	2.54698e-07	2.9504e-06	UP
Edem3	1.07	1.4	1.17	27.28	27.94	26.38	4.30213	5.63905e-05	0.000390269	UP
Senp6	2.29	2	1.69	53.58	53.05	54.8	4.30163	1.52768e-08	2.22083e-07	UP
Ppp4r3b	0.9	1.35	1.13	26.19	28.17	25.56	4.28405	6.26314e-05	0.000428713	UP
Trim33	1.34	0.87	1.17	25.98	26.83	27.12	4.28372	6.20333e-05	0.000424852	UP
Zfp131	1.06	1	1.22	26.04	26.76	26.92	4.28372	6.20333e-05	0.000424852	UP
Peg3	0.7	0.61	0.7	27.46	26.35	25.55	4.26588	6.89746e-05	0.000465756	UP
Smc6	0.68	0.43	0.63	16.79	17.27	17.55	4.25139	0.0014013	0.00636208	UP
Arhgap12	1.37	1.45	1.31	25.44	27.33	26.36	4.24728	7.68718e-05	0.000514083	UP
Stk3	1.11	0.83	1.15	25.67	24.85	27.3	4.247	7.67399e-05	0.000513702	UP
Igf1	1.38	1.48	1.34	25.76	23.63	28.23	4.24665	7.83662e-05	0.000521843	UP
Dmtf1	1.89	1.69	1.19	42.31	43.7	44.12	4.24631	4.51657e-07	5.00023e-06	UP
Xrcc4	0.5	1.39	0.82	16.8	18.89	15.86	4.24562	0.00144538	0.00651724	UP
Cops2	3.28	4.47	3.28	87.6	88.45	82.76	4.24126	1.34332e-12	3.30516e-11	UP
Xpo1	2.08	2.27	1.62	50.18	52.88	52.31	4.23795	3.15404e-08	4.32737e-07	UP
Zmym5	0.86	1.14	0.94	26.03	27.16	24.32	4.22934	8.66476e-05	0.000569705	UP
Bclaf1	2.57	2.38	2.34	58.56	60.93	58.67	4.22413	3.26822e-09	5.17081e-08	UP
Zfp62	0.56	0.73	0.56	23.69	26.8	24.66	4.2099	9.59536e-05	0.000625523	UP
Ppig	0.78	1.12	1.2	24.87	24.87	26.32	4.20961	9.43257e-05	0.000616942	UP
Erbin	3.08	3.74	3.03	81.57	84.82	82.53	4.18984	3.08219e-12	7.17399e-11	UP
Mphosph10	0.61	0.64	0.48	17.37	16.64	16.24	4.18901	0.00176531	0.00767466	UP
Zfp788	0.47	0.85	0.53	16.33	17.83	16.43	4.18861	0.00178027	0.00772894	UP
Hsp90b1	42.28	41.83	42.11	1024.1	1085.53	1032.15	4.18717	1.25817e-124	5.6164e-122	UP
Psmc6	3.3	4.22	4.32	90.18	88.25	95.22	4.17936	3.28338e-13	8.56762e-12	UP
Ube2v2	3.59	1.14	2	62.33	51.37	60.3	4.17695	1.80548e-08	2.59388e-07	UP
Thy1	3.71	1.7	0.63	56.93	52.79	62.69	4.17416	1.69938e-08	2.44989e-07	UP
Or2y7	2.31	0.51	2	41.39	45.49	36.59	4.17024	1.0409e-06	1.06467e-05	UP
Ddx50	2.3	3.29	3.1	64.58	67	64.23	4.16117	6.51589e-10	1.10505e-08	UP
Srek1	1.7	1.55	1.36	40.06	39.63	42.33	4.15451	1.03522e-06	1.06059e-05	UP
Ranbp2	1.08	0.96	0.95	23.81	25.64	23.32	4.15223	0.000132542	0.000825844	UP
Zfp617	1.1	1.34	1.25	24.45	26.26	22.96	4.15223	0.000132542	0.000825844	UP
Rbbp8	0.62	0.7	0.73	23.99	23.46	25.79	4.15112	0.000131775	0.000822296	UP
Smarca5	1.35	1.77	1.61	40.08	40.13	41.11	4.14268	1.14643e-06	1.16121e-05	UP
Hey2	2.5	2.11	2.33	48.51	48.36	47.64	4.14193	8.83295e-08	1.11518e-06	UP
Ipo7	2.52	1.59	2.42	57.25	54.97	56.83	4.14104	9.1263e-09	1.37932e-07	UP
Gpbp1	3.37	2.4	3	61.98	67.32	63.78	4.14051	8.69529e-10	1.45548e-08	UP
Dek	3.14	3.63	3.14	79.98	81.34	80.05	4.13695	7.68874e-12	1.68304e-10	UP
Pggt1b	0.61	0.45	0.89	15.5	15.62	16.11	4.1365	0.00216349	0.00910179	UP
Tia1	2.23	1.88	2.03	48.02	48.89	46.82	4.13205	9.89525e-08	1.22943e-06	UP
Strn3	2.21	1.98	2.23	47.9	48.18	48.08	4.13186	9.76089e-08	1.21758e-06	UP
Top2b	1.47	1.25	1.13	23.2	23.98	24.79	4.13141	0.000145428	0.000888417	UP
Arhgef38	0.41	1	0.78	14.59	17.19	16.06	4.12926	0.00221252	0.00927372	UP
Rasa1	1.63	1.08	0.98	31.88	33.01	29.75	4.11849	1.60921e-05	0.000127775	UP
Trnt1	1.28	2.3	1.48	31.06	33.77	28.96	4.09976	1.89403e-05	0.000148237	UP
Ncoa7	3.95	2.4	2.75	68.93	71.46	70.06	4.09285	2.08448e-10	3.83749e-09	UP
Oc90	0.87	0.66	0.66	22.27	24.13	23.5	4.09086	0.000181413	0.00107821	UP
Zcchc7	1.5	1.65	1.13	37.88	39.08	39.37	4.08195	1.94981e-06	1.87467e-05	UP
Arhgap5	1.79	2.66	2.32	53.6	56.57	51.28	4.07851	2.1537e-08	3.0486e-07	UP
Tmem263	1.4	1.36	0.85	24.47	21.96	23.11	4.07053	0.000202257	0.00118519	UP
Pros1	1.88	1.67	1.96	46.49	46.24	46.46	4.07046	1.84454e-07	2.19153e-06	UP
Gabpa	1.17	1.27	1.47	21.8	23.82	23.38	4.07038	0.000202119	0.00118519	UP
Tpp2	0.9	1.37	1.18	21.63	24.11	23.24	4.07038	0.000202119	0.00118519	UP
Osgin2	0.88	1.24	0.96	21.23	23.96	23.79	4.06992	0.000205176	0.00119893	UP
Zfp932	0.84	1.76	2.09	38.71	38.79	37.11	4.06978	2.20887e-06	2.09993e-05	UP
Ints6l	1.45	1.55	1.3	30.91	31.15	30.5	4.06829	2.22973e-05	0.000171399	UP
Zmym6	1.24	1.66	1	29.87	30.37	31.23	4.05207	2.47351e-05	0.000188515	UP
Kpna3	1.11	0.9	0.78	22.89	24.26	21.15	4.05008	0.000229013	0.00132031	UP
Eif2s3y	1.19	1.07	0.78	21.02	22.62	23.84	4.04874	0.000227662	0.00131434	UP
Abce1	2.46	2.52	2.35	49.49	55.38	54.04	4.04157	3.22727e-08	4.41814e-07	UP
Eya4	5.13	4.57	4.19	103.7	103.4	107.9	4.03814	6.18538e-15	1.92796e-13	UP
Pnrc2	10.72	10.1	11.56	173.29	356.71	208.8	4.03357	1.03178e-19	4.47787e-18	UP
Scfd1	1.24	3.2	2.62	48.06	56.57	51.82	4.03248	6.33929e-08	8.22791e-07	UP
Ppp1r12a	1.28	1.15	1.16	21.94	21.73	22.59	4.02773	0.00025047	0.00143409	UP
Capn7	0.88	1.7	1.88	35.06	39.5	35.27	4.0056	4.0031e-06	3.5893e-05	UP
Rpf2	1.02	1.34	1.46	20.3	22.22	23.66	4.00535	0.000288007	0.00161861	UP
Nebl	5.3	5.45	4.36	99.52	104.37	102.78	4.0012	1.4569e-14	4.37735e-13	UP
Rsrc2	4.56	4.03	2.54	83.63	92.89	85.49	3.99558	1.81594e-12	4.35651e-11	UP
Yme1l1	1.89	2.74	1.87	50.32	52.49	50.98	3.99547	5.177e-08	6.84669e-07	UP
Cxcl12	1.38	1.76	1.92	36.53	38.36	34.4	3.9927	4.35113e-06	3.87356e-05	UP
Dnttip2	1.37	1.74	1.11	27.31	29.03	30.91	3.98662	3.93004e-05	0.000282959	UP
Zfp397	0.97	0.81	0.87	21.84	22.18	20.71	3.9846	0.000313931	0.00175484	UP
Orc4	1.21	1.25	1.35	21.23	22.53	20.6	3.98452	0.000316445	0.00176574	UP
Psd3	1.42	0.96	0.57	20.84	21.96	21.77	3.98411	0.000313312	0.00175216	UP
Ift81	1.7	1.51	2.14	41.62	44.28	43.77	3.98411	4.39886e-07	4.87423e-06	UP
Zranb2	4.72	3.03	2.79	78.23	79.53	79.31	3.97717	1.89732e-11	4.01261e-10	UP
Fut8	1.81	1.71	1.16	36.88	36.08	34.24	3.96597	5.3072e-06	4.6194e-05	UP
Tmem184c	1.68	2.29	1.46	35.42	35.86	35.7	3.96538	5.16862e-06	4.5145e-05	UP
Phf20l1	0.8	0.91	0.82	21.51	20.95	21.49	3.96212	0.000351145	0.00192667	UP
Rgs2	0.79	0.64	0.97	20.91	21.98	21.43	3.96204	0.000351037	0.00192667	UP
Xist	1.9	1.6	1.5	42.56	42.24	42.83	3.96187	5.44574e-07	5.96028e-06	UP
Myef2	0.91	1.25	1.16	22.45	19.99	21.75	3.9617	0.000353694	0.00193811	UP
Marchf7	2.78	3.16	2.44	56.3	57.89	55.93	3.95577	1.00852e-08	1.49887e-07	UP
Lims1	3.06	3.49	3.21	66.01	63.6	60.72	3.95483	1.17778e-09	1.94724e-08	UP
Lin7c	3.91	2.87	3.17	68.6	73.15	70.41	3.95346	1.61877e-10	3.01985e-09	UP
Stag2	1.62	2.45	2.16	41.79	41.85	42.91	3.95046	6.06152e-07	6.56524e-06	UP
Acss3	5.16	5.38	5.92	111.35	118.3	108.51	3.94834	9.61173e-16	3.18666e-14	UP
Pcmtd1	1.58	1.65	1.51	43.38	41.42	42.04	3.93925	6.83621e-07	7.35967e-06	UP
Ift80	0.72	1.12	1.14	19.91	20.6	22	3.9387	0.000394469	0.00212246	UP
2610008E11Rik	0.51	0.52	0.78	20.45	21.24	22.31	3.9387	0.000394469	0.00212246	UP
Tspan12	5.82	5.27	5.39	113.78	112.06	109.24	3.9355	1.1595e-15	3.81384e-14	UP
Gm6361	3.74	0	0	36.53	27.4	18.81	3.93458	0.00132811	0.00607613	UP
Fbxo11	2.83	3.37	3.01	63.38	62.76	61.76	3.93166	1.52009e-09	2.48687e-08	UP
Fnbp1l	2.6	2.93	3.17	61.26	63.62	63.38	3.93146	1.52706e-09	2.495e-08	UP
Hsp90aa1	13.19	11.65	10.83	242.77	254.78	252	3.9276	1.20254e-32	9.88856e-31	UP
Usp33	1.48	2.05	2.22	33.37	35.61	35.08	3.92415	7.31976e-06	6.23651e-05	UP
Fyttd1	2.88	2.12	2.33	50.19	48.39	47.44	3.92052	1.21729e-07	1.48583e-06	UP
Gm44777	0.89	1.86	1.49	27.92	27.26	27.66	3.91931	5.97511e-05	0.000410797	UP
Galnt7	1.4	1	1.01	20.77	21.17	19.99	3.91644	0.000440775	0.00233938	UP
Pkn2	1.23	1.22	1.21	20.1	19.79	21.57	3.91549	0.000443045	0.00234844	UP
Npm1	21.37	25.01	20.64	463.8	439.02	471.49	3.90404	4.13874e-56	7.28593e-54	UP
Mtf2	2.78	2.94	2.13	54.01	54.9	55.02	3.90376	1.90787e-08	2.73156e-07	UP
Pdgfd	0.84	1.64	1.36	27.19	29.04	26.31	3.9023	6.82458e-05	0.000461832	UP
Dcun1d1	1.09	2.22	1.34	29.07	26.33	27.31	3.9021	6.81329e-05	0.000461318	UP
Acsl3	10.36	10.74	11.3	217.2	218.25	219.91	3.90198	7.00978e-29	4.84062e-27	UP
Zfp386	2.19	1.6	1.14	34.71	32.49	35.49	3.8962	9.17847e-06	7.6533e-05	UP
Ints8	0.88	0.86	1.36	20.59	20.25	19.63	3.89287	0.000493939	0.00258316	UP
Fam76b	0.75	1.27	0.74	20.05	21.37	19.96	3.89278	0.000493799	0.00258316	UP
Tasor	0.9	0.74	0.81	20.33	19.98	20.87	3.89234	0.00049306	0.00258072	UP
Adgra2	0.88	0.99	0.8	19.39	21	21.37	3.89226	0.000497422	0.00259702	UP
Gulp1	0.93	1.32	1.44	18.96	20.84	20.57	3.89226	0.000497422	0.00259702	UP
Paxbp1	1.04	1.53	1.07	27.49	28.31	26.48	3.8845	7.54491e-05	0.000505996	UP
Eya1	6.48	5.29	6.42	115.97	113.37	113.98	3.88215	5.62163e-16	1.89393e-14	UP
Top1	2.96	3.63	2.69	67.41	67.29	68.19	3.88203	4.82855e-10	8.39389e-09	UP
Zfp68	2.67	1.72	0.94	40.11	42.39	38.75	3.88118	1.83803e-06	1.7809e-05	UP
Hnrnph1	15.62	14.09	13.93	289.07	286.37	310.64	3.87835	7.85713e-38	8.18386e-36	UP
Rab8b	1.1	1.15	1.33	20.89	20.63	18.48	3.8698	0.000569229	0.00292669	UP
Cnot6	3.09	2.2	2.15	45.99	48.06	45.9	3.8697	2.07868e-07	2.44186e-06	UP
Sltm	2.17	2.09	2.62	46.25	48.22	46.15	3.86961	2.08175e-07	2.44318e-06	UP
Pals1	1.36	1.13	1.04	20.63	20.45	19.45	3.86935	0.000558016	0.00287259	UP
Suco	1.71	2.38	2.59	45.79	46.3	47.78	3.86922	2.05637e-07	2.41913e-06	UP
Ireb2	2.2	2.02	2.49	39.54	40.95	38.89	3.86904	1.33414e-06	1.32872e-05	UP
Snx13	1.16	1.19	0.98	19.73	19.99	20.08	3.86881	0.000552125	0.00284695	UP
Ufl1	1.17	1.19	0.96	19.38	20.78	19.9	3.86873	0.000556907	0.00286806	UP
Mob1b	1.34	1.63	1.54	32.45	33.85	33.61	3.86746	1.13172e-05	9.28172e-05	UP
Ccdc47	3.8	3.87	3.39	70.17	71.22	78.33	3.8611	1.04966e-10	2.01532e-09	UP
Eif2s2	4.41	4.11	4.69	83.15	85.9	88.76	3.85768	2.18604e-12	5.18469e-11	UP
Hmgcs1	2.65	3.48	3.01	59.77	58.01	59.79	3.85261	4.53777e-09	7.10746e-08	UP
Zfp644	0.66	0.98	1.52	25.94	28.21	25.29	3.85231	9.36102e-05	0.000612583	UP
2010315B03Rik	0.74	1.65	1.48	26.06	28.48	24.92	3.84849	9.57063e-05	0.000624339	UP
Cwc22	1.36	1.17	0.92	20.05	19.57	18.61	3.8449	0.000622296	0.00315405	UP
Arap2	1.02	1.15	1.08	20.15	20.34	19.45	3.8449	0.000622296	0.00315405	UP
Naa15	1.21	0.82	0.64	18.76	19.63	19.91	3.84436	0.000621253	0.00315139	UP
Idi1	2.35	1.8	1.44	31.41	34.73	31.62	3.83877	1.45796e-05	0.000117039	UP
Mmp3	3.39	2.29	1.74	44.24	44.74	48.19	3.83783	2.9176e-07	3.32425e-06	UP
Upf3b	1.51	0.72	0.72	25.87	26.74	25.08	3.83401	0.00010351	0.00066552	UP
Zfp146	1.89	3.64	2.13	53.32	53.19	49.74	3.82989	7.2981e-08	9.3654e-07	UP
Zfp943	0.97	1.81	0.74	25.74	26.3	26.4	3.82967	0.000104731	0.000671299	UP
Bhlhb9	2.79	2.93	2.98	54.68	62.84	56.51	3.82828	7.2971e-09	1.11499e-07	UP
Trpm7	1.7	1.53	1.11	31.82	33.56	31.05	3.82423	1.6101e-05	0.000127775	UP
Larp4	0.93	1.33	1.45	18.51	20.52	17.67	3.82049	0.00071197	0.00353693	UP
Mbtd1	0.71	1.32	1	19.67	19.14	19.25	3.82012	0.000698682	0.00349093	UP
Casd1	0.79	0.85	0.99	19.19	19.75	18.68	3.82003	0.000698501	0.00349093	UP
Fam135a	0.92	1.26	1.05	18.95	20	19.31	3.82003	0.000698501	0.00349093	UP
Thoc2	0.9	0.88	0.77	19.04	19.79	18.85	3.82003	0.000698501	0.00349093	UP
Bmt2	1.42	1.03	0.84	18.38	20.83	18.7	3.81994	0.000710841	0.00353413	UP
Rnf170	1.36	0.88	1.22	18.76	19.14	19.66	3.81956	0.000697547	0.00349093	UP
Mib1	1.2	1.23	1.13	18.89	19.14	19.59	3.81956	0.000697547	0.00349093	UP
Jmjd1c	0.79	0.9	0.87	19.33	19.35	19.82	3.81956	0.000697547	0.00349093	UP
Yes1	1.02	0.83	0.74	18.2	20.06	19.6	3.81948	0.000703905	0.00351208	UP
Zbtb33	1.26	1.34	1.38	17.8	20.36	20.17	3.81948	0.000703905	0.00351208	UP
Zmym2	2.23	1.23	1.77	33.47	32.53	30.03	3.81265	1.77319e-05	0.000139566	UP
Emc2	5.45	3.33	4.93	80.09	86.62	81.54	3.80819	8.9306e-12	1.95146e-10	UP
Purb	2.49	2.35	2.49	36.81	39.3	39.42	3.80719	2.32356e-06	2.19684e-05	UP
Spag9	2.98	2.25	2.35	43.12	45.76	44.54	3.80629	4.06003e-07	4.53092e-06	UP
Dnajb4	3.37	2.02	2.02	42.64	44.54	45.52	3.80609	4.03618e-07	4.51236e-06	UP
Spp1	31.77	36.06	29.94	601.99	646.33	627.14	3.80413	2.22494e-73	5.67542e-71	UP
Nktr	3.31	2.92	2.77	57.19	56.85	57.65	3.80311	8.74083e-09	1.32266e-07	UP
Papss2	3.64	2.6	2.68	61.95	64.71	64.09	3.80286	1.56884e-09	2.55991e-08	UP
Ogt	9.83	10.02	9.57	186.9	194.18	192.49	3.8023	2.53623e-25	1.46085e-23	UP
Gpcpd1	1.57	1.22	0.75	24.59	26.92	24.38	3.79667	0.000131652	0.000821935	UP
Esco1	0.91	0.99	1.06	20.3	19.85	17.28	3.79584	0.000807045	0.00394034	UP
Gm10754	0.84	1.22	0.84	18.87	20.56	17.12	3.79575	0.00081346	0.00396391	UP
Ralgapa1	1.4	1.33	1.15	18.8	19.14	19.37	3.79481	0.000782453	0.00383525	UP
Cul4b	1.18	1.28	0.93	18.7	18.71	18.77	3.79481	0.000782453	0.00383525	UP
Smc4	1.11	0.72	0.69	19.19	18.51	18.98	3.79481	0.000782453	0.00383525	UP
Bmpr2	1.05	1.29	1.01	18.64	19.28	19.06	3.79481	0.000782453	0.00383525	UP
Nbn	1.24	1.25	1.21	17.74	19.55	19	3.79472	0.000789428	0.00386337	UP
Morc3	1.19	1.16	0.93	17.31	20.91	19.3	3.79463	0.000811018	0.0039551	UP
Rbm25	2.6	2.93	2.65	55.17	57.25	59.44	3.79443	9.95277e-09	1.48271e-07	UP
Smarca1	1.66	1.68	1.35	30.59	32.77	31.27	3.79396	1.99629e-05	0.000155324	UP
Chuk	1.27	2.12	2.07	31.03	32.69	30.69	3.79383	1.99853e-05	0.000155324	UP
Luc7l2	5.93	6.75	6.19	118.84	115.4	124.64	3.7858	2.00328e-16	6.95528e-15	UP
Dhx9	6.41	5.24	4.24	94.03	95.96	92.42	3.77978	3.60572e-13	9.3502e-12	UP
Taf1d	2.26	3.37	1.37	36.55	37.25	38.82	3.77901	4.52319e-06	4.00675e-05	UP
Adamts1	1.47	1.45	1.68	24.72	24.92	24.95	3.77694	0.00014436	0.00088492	UP
Rap2c	0.66	0.66	0.94	18.68	17.97	18.9	3.76914	0.000882435	0.00426345	UP
Cdc27	0.87	0.94	0.79	18.27	18.52	19.42	3.76905	0.000882221	0.00426345	UP
B230219D22Rik	3.14	3.63	3.35	62.4	60.66	61.84	3.7552	3.16978e-09	5.03419e-08	UP
Nop58	1.96	2.13	2.55	40.68	42.6	45.01	3.75098	7.17028e-07	7.67922e-06	UP
Syncrip	3.09	3.21	3.97	62.47	60.82	60.93	3.74909	3.40322e-09	5.37761e-08	UP
Gxylt2	1.08	0.95	1.05	19.4	19.05	17.15	3.74399	0.00100472	0.0047731	UP
Exoc5	1.07	1.15	0.85	18.9	17.85	18.25	3.7435	0.000993955	0.00472554	UP
Hs6st2	0.93	1.1	1.28	19.45	18.32	18.21	3.7435	0.000993955	0.00472554	UP
Vps54	2.26	2.39	2.17	36.74	37.06	35.76	3.74346	4.0951e-06	3.6639e-05	UP
Mospd1	0.73	0.73	1.02	17.8	17.69	19.09	3.74292	0.000992502	0.00472402	UP
Tmem161b	1.21	0.61	0.59	16.03	18.87	20.01	3.74225	0.00102944	0.00487393	UP
Magt1	3.06	3.11	3.23	55.05	55.71	52.79	3.73479	2.22428e-08	3.13784e-07	UP
Zdhhc20	1.22	1.5	1.18	25.45	24.08	23.95	3.73417	0.000186629	0.00110658	UP
Clk1	5.14	3.86	4.59	83.16	78.98	93.39	3.73378	5.25667e-12	1.18384e-10	UP
Klhl7	2.42	2.47	2.43	37.21	37.55	34.4	3.73071	4.79703e-06	4.21943e-05	UP
Xiap	1.56	2.22	1.96	37.53	35.63	35.43	3.73051	4.69229e-06	4.13021e-05	UP
Fcho2	1.91	2.03	1.99	36.95	35.27	36.86	3.72997	4.60613e-06	4.06295e-05	UP
Tmx3	2.85	2.37	2.06	41	44.04	41.89	3.72905	8.97284e-07	9.29176e-06	UP
Atp2b1	3.43	2.98	2.25	48.93	48.7	46.54	3.72641	1.61241e-07	1.93597e-06	UP
Dynlt3	7.89	8.08	7.36	137.33	138.61	139.43	3.71999	1.16261e-18	4.73338e-17	UP
Lix1l	1.49	1.43	2.18	24.23	24.64	22.71	3.71845	0.000206535	0.00120461	UP
Usp16	1.9	1.43	1	23.36	25.07	23.74	3.71817	0.000205792	0.00120084	UP
Usp9x	2.33	2.36	2.09	35.63	36.86	34.67	3.71705	5.18562e-06	4.52619e-05	UP
Hmgn5	0.65	0.68	1.13	19.19	17.39	17.84	3.7169	0.00112601	0.00526129	UP
Upf2	0.68	0.51	0.82	17.77	17.78	18.23	3.7168	0.00111527	0.00522286	UP
Taf1	0.91	0.78	1.02	17.09	18.55	18.46	3.71671	0.00112551	0.00526092	UP
Zfp445	2.69	2.83	2.28	47.51	49.54	46.09	3.71653	1.85438e-07	2.19904e-06	UP
Hspa13	1.18	1.64	0.93	23.95	23.76	23.7	3.71408	0.000208733	0.00121686	UP
Zc3h7a	2.76	2.5	2.77	44.67	48.84	48.95	3.70778	1.97352e-07	2.33064e-06	UP
Srp54c	1.55	4.13	2.75	55.37	53.06	53.29	3.70608	4.69781e-08	6.2965e-07	UP
Prpf40a	2.35	2.26	1.73	35.24	35.15	36.57	3.70301	5.76988e-06	4.99084e-05	UP
Mospd2	2.37	1.01	1.72	28.22	31.28	30.01	3.70268	3.88591e-05	0.000280104	UP
Plod2	4.42	5.74	5.88	90.7	95.72	96.99	3.69556	4.55039e-13	1.16794e-11	UP
Bet1	1.88	2.19	3.35	39.92	42.35	41.5	3.69426	1.24645e-06	1.25456e-05	UP
Evi5	0.83	0.72	0.94	17.72	18.78	16.07	3.69071	0.00128759	0.00591893	UP
Ube3a	1.32	1.35	1.12	17.79	18.44	17.39	3.6902	0.00126182	0.00581545	UP
Epc2	1.24	0.91	1.18	18.11	18.48	16.75	3.6902	0.00126182	0.00581545	UP
Svip	1.47	1.26	0.9	17.36	18.28	18.2	3.6896	0.00126012	0.0058119	UP
Slc25a36	3.58	3.77	3.7	69.72	72.2	69.19	3.68317	2.74838e-10	4.957e-09	UP
Bmpr1a	3.89	3.66	3.51	68.56	72.02	70.5	3.68302	2.7133e-10	4.9079e-09	UP
Eif1a	4.63	4.88	5.41	82.1	90.5	88.59	3.66758	2.75858e-12	6.48112e-11	UP
C1galt1	1.19	1.46	1.04	17.14	18.67	16.49	3.66301	0.00145031	0.00653478	UP
Usp15	1.08	0.95	1.03	18.01	17.48	16.57	3.66259	0.00142232	0.00643416	UP
Gorab	0.97	1.48	0.9	17.8	16.87	16.83	3.66259	0.00142232	0.00643416	UP
Ythdf3	3.26	2.87	2.85	52.52	51.86	50.88	3.66256	5.4221e-08	7.13377e-07	UP
Rb1	1.07	1.21	1.35	16.37	18.69	16.84	3.66239	0.0014485	0.00652896	UP
Fndc3a	3.73	3.65	3.8	68.9	69.92	69.37	3.66239	3.7484e-10	6.61741e-09	UP
Rps6kb1	1.01	1	1.06	17.35	17.19	18.15	3.66198	0.00142048	0.00643284	UP
Kpna4	1.9	2.29	2.16	32.91	35.01	35.53	3.66193	8.23047e-06	6.92279e-05	UP
Stag1	0.82	0.84	0.89	16.31	18.11	18.2	3.66188	0.00143425	0.00646939	UP
Atad1	4.35	3.62	4.71	74.67	75.48	74.15	3.65429	9.33079e-11	1.81096e-09	UP
Mbnl2	5.42	6.77	6.36	101.08	105.68	101.78	3.64747	4.72594e-14	1.3304e-12	UP
Srsf10	4.55	4.79	4.7	86.39	83.9	86.65	3.64547	3.81719e-12	8.80278e-11	UP
Ppid	2.96	2.58	3.11	50.57	50.08	53.05	3.64343	6.74664e-08	8.7024e-07	UP
Rap1a	3.9	2.8	2.41	48.3	49.68	55.73	3.64288	1.08042e-07	1.33837e-06	UP
Sec62	4.83	5.25	5.88	90.48	89.66	93.21	3.63975	9.40385e-13	2.34608e-11	UP
Gprasp1	5.31	5.51	5.56	97.68	98.77	93.03	3.63932	2.35661e-13	6.29386e-12	UP
Kif5b	6.05	5.84	5.16	94.41	99.51	95.52	3.63901	2.19414e-13	5.87249e-12	UP
Man1a2	0.98	1.06	1.27	17.62	17.37	16.42	3.63496	0.00161646	0.00714179	UP
Sacm1l	4.17	2.6	2.71	55.66	56.45	58.37	3.63471	1.63647e-08	2.36193e-07	UP
Braf	1.01	1.03	1.01	17.29	17.02	16.73	3.63434	0.00159908	0.00708503	UP
Gtf2a1	0.95	1.03	1.34	17.2	17.13	17.37	3.63434	0.00159908	0.00708503	UP
Nipbl	0.73	0.79	0.66	16.73	17	16.99	3.63434	0.00159908	0.00708503	UP
Cebpz	1.11	1.33	0.86	17.49	16.88	17.34	3.63434	0.00159908	0.00708503	UP
Nr3c1	1.14	1.42	0.95	16.65	16.71	16.72	3.63434	0.00159908	0.00708503	UP
Phip	0.82	0.94	0.7	16.93	17.26	17.03	3.63434	0.00159908	0.00708503	UP
Pten	1.61	2.08	1.72	34.04	33.97	33.72	3.63434	1.02345e-05	8.44362e-05	UP
Odf2l	0.82	1.1	0.88	16.32	18.42	17.18	3.63424	0.00161418	0.00713425	UP
Kdm6a	0.97	1.11	1.17	16.23	17.41	18.4	3.63371	0.00161252	0.00713197	UP
Sf3b1	6.62	6.27	5.86	105.98	107.5	107.37	3.62568	1.11507e-14	3.39934e-13	UP
Trpm3	12.99	11.84	12.82	213.09	210.64	216.67	3.62328	1.51186e-27	9.64122e-26	UP
Igfbp4	12.14	14.94	7.9	201.93	193.65	194.37	3.62046	3.4658e-23	1.84336e-21	UP
Mef2a	1.71	1.89	1.62	35.65	31.76	32.81	3.62042	1.20128e-05	9.78161e-05	UP
Rabgap1l	1.74	1.4	1.92	28.6	28.31	27.18	3.61991	6.90535e-05	0.000466036	UP
Suz12	2.03	1.37	1.51	26.95	28.62	27.79	3.61946	6.87593e-05	0.000464552	UP
Col9a1	10.95	11.1	11.18	188.09	184.18	182.58	3.61894	4.9199e-24	2.70898e-22	UP
Uba3	3.55	2.78	2.76	57.3	54.98	56.24	3.6179	2.07816e-08	2.94834e-07	UP
Rasef	0.53	1.76	2.23	27.74	27.55	28.08	3.61605	7.00111e-05	0.000472245	UP
Ppp4r2	2.57	3.2	3.48	48.33	52.3	51.01	3.61515	9.74253e-08	1.2165e-06	UP
Kras	1.29	1.64	1.41	22.68	20.64	22.77	3.60991	0.000379519	0.00205351	UP
Hccs	1.45	0.55	0.95	17.55	16.9	15.18	3.60679	0.00185079	0.00799344	UP
Tmtc3	0.51	0.78	0.59	16.51	16.69	16.11	3.60616	0.00181277	0.0078564	UP
Sirt1	0.54	1.28	0.68	15.51	17.96	15.86	3.60606	0.00182939	0.00791743	UP
Erap1	0.86	0.91	1.13	16.9	16.17	16.96	3.60562	0.00181099	0.0078514	UP
Creb1	1.34	1.41	1.26	16.06	17	17.44	3.60552	0.00181065	0.0078514	UP
Zc3h15	5.07	3.47	5.01	69.62	72.91	72.91	3.60296	3.15628e-10	5.6197e-09	UP
Tdrd3	1.71	1.26	2.31	27.56	28.25	26.9	3.60249	7.70539e-05	0.00051475	UP
Tbc1d23	2.11	1.46	1.86	26.57	27.69	27.64	3.60211	7.67737e-05	0.000513702	UP
Mrc2	1.86	1.7	1.2	27.53	27.26	27.73	3.59882	7.88041e-05	0.000523922	UP
Zc2hc1a	1.94	1.3	1.33	21.15	24.24	20.58	3.59311	0.000425065	0.00226659	UP
Arid4b	1.67	0.73	0.81	23.48	20.92	22.09	3.59285	0.000417005	0.00222932	UP
Cul2	1.54	1.19	1.05	21.27	22.39	22.87	3.59229	0.000415869	0.00222515	UP
Atp11b	2.07	2.44	1.67	33.41	33.74	32.2	3.59154	1.47234e-05	0.000117891	UP
Pum2	3.71	3.34	3.11	54.47	54.43	57.23	3.59152	2.92351e-08	4.04214e-07	UP
Zhx1	1.7	1.57	1.63	31.54	34.03	33.17	3.59121	1.46518e-05	0.000117393	UP
Dipk2a	2.57	2.65	2.48	44.77	45	42.33	3.59103	7.24396e-07	7.72545e-06	UP
Bmi1	1.96	2.68	2.64	43.63	46.2	41.92	3.5909	7.31004e-07	7.78928e-06	UP
Tent5a	1.23	1.54	1.15	22.36	22.33	21.67	3.58842	0.000422353	0.00225501	UP
Cir1	1.23	2.04	1.4	22.92	19.66	23.3	3.58807	0.000434042	0.00230757	UP
Tax1bp1	8.02	8.71	6.89	128.07	135.14	130.69	3.5832	2.46103e-17	9.12772e-16	UP
Capn6	4.4	5.25	3.95	71.02	70.89	71.16	3.58024	3.39563e-10	6.01162e-09	UP
Crnkl1	1.46	1.3	1.47	17.28	16.35	16.37	3.57687	0.00204754	0.00869597	UP
Tgfbr1	0.75	0.54	0.69	16.61	15.75	16.17	3.57687	0.00204754	0.00869597	UP
Zfc3h1	0.79	0.75	0.78	16.18	15.81	16.73	3.57622	0.00204527	0.00869223	UP
Ikbip	2.63	1.91	1.69	36.51	37.52	39.08	3.573	3.92089e-06	3.52063e-05	UP
Dbt	1.59	1.29	1.05	22.03	21.01	21.6	3.57064	0.000466381	0.00245962	UP
Phf14	1.5	1.4	1.52	26.97	27.84	25.59	3.56743	9.81807e-05	0.000636824	UP
Fbxl3	3.1	3.15	3.03	49.27	49.27	47.8	3.5669	1.69393e-07	2.02801e-06	UP
Sparcl1	16.15	14.54	13.19	236.44	237.54	238.62	3.56502	8.63333e-30	6.34753e-28	UP
Clk4	3.35	3.96	3	52.77	58.32	51.18	3.56407	4.91332e-08	6.54011e-07	UP
U2surp	1.78	1.74	1.1	26.37	27.65	26.91	3.56364	0.000100348	0.000648528	UP
Acadsb	2.56	2.76	2.72	46.54	48.59	48.94	3.55668	1.89733e-07	2.24784e-06	UP
Rnf6	3.34	1.75	2.28	38.29	37.85	36	3.54811	5.03053e-06	4.40555e-05	UP
Usp1	1.68	1	1.29	21.33	21.47	22.34	3.54809	0.000525082	0.00272437	UP
Rab11fip2	0.66	0.6	0.83	16.57	16.5	15.24	3.54753	0.00233188	0.009696	UP
Taok1	0.86	1.11	1.23	15.75	16.08	16.27	3.54687	0.00230666	0.00961032	UP
Zfp148	1.08	1.08	0.94	15.99	15.8	16.1	3.54687	0.00230666	0.00961032	UP
Hook1	0.7	0.61	0.61	16.43	16.24	15.93	3.54687	0.00230666	0.00961032	UP
Zfp612	0.8	0.99	0.86	15.92	16.38	15.88	3.54687	0.00230666	0.00961032	UP
Trp53inp1	2.04	2.13	1.73	31.42	32.33	33.09	3.54654	2.07685e-05	0.000160634	UP
Kera	0.65	1.35	1.22	15.16	15.58	16.83	3.54621	0.00232707	0.00968242	UP
Appl1	1.37	1.25	1.45	15.4	16.01	17.29	3.54621	0.00232707	0.00968242	UP
Galnt3	3.55	2.7	3.16	50.79	55.04	52.92	3.53838	5.97155e-08	7.77484e-07	UP
Birc2	2.24	1.28	1.66	27.75	25.05	26.24	3.53128	0.000125802	0.00079015	UP
Map2	1.69	1.61	1.39	25.74	26.97	26.07	3.52771	0.000126495	0.000794102	UP
Ctsk	1.81	0.69	0.88	20.61	21.31	20.92	3.52569	0.000590914	0.00302079	UP
Rmi1	1.77	1.24	1.41	20.43	22.24	20.6	3.52561	0.000596381	0.00304251	UP
Gls	6.04	5.25	5.06	81.75	87.11	83.08	3.52461	1.09196e-11	2.35318e-10	UP
Zfp260	3.25	2.7	2.48	43.18	42.88	39.51	3.52392	1.45075e-06	1.43684e-05	UP
Csnk1g3	1.22	1.67	1.29	20.74	21.11	21.47	3.52123	0.000604231	0.00307879	UP
Mtif2	1.36	1.86	1.25	20.19	21.59	20.57	3.52115	0.00060982	0.00310221	UP
Nae1	2.74	2.99	2.8	48.36	46.37	47.06	3.51653	3.03375e-07	3.4503e-06	UP
Serinc1	9.65	8.3	7.61	138.38	137.8	131.38	3.51615	1.20103e-17	4.59072e-16	UP
Marcks	5.47	7.12	6.03	92.65	94.09	94.76	3.51534	9.03412e-13	2.25835e-11	UP
Ddx3x	13.96	14.7	14.14	223.35	225.54	223.92	3.51478	3.06477e-28	2.0268e-26	UP
Bcap29	2.16	2.43	2.6	37.79	35.76	35.32	3.5089	7.22391e-06	6.16325e-05	UP
Ppp1cb	6.04	6.13	5.48	86.87	89.45	88.03	3.50344	3.84477e-12	8.83379e-11	UP
Selenot	8.47	7.95	8.84	123.97	133.12	129.66	3.49929	5.51388e-17	2.00927e-15	UP
Col5a1	2.61	2.78	2.73	47.32	46.01	46.11	3.49597	3.81408e-07	4.28321e-06	UP
Smim15	2.53	2	1.57	33.41	39.65	34.8	3.49542	8.87375e-06	7.42389e-05	UP
Syap1	7.08	5.8	6.28	95.38	99.65	98.41	3.49395	2.74889e-13	7.20301e-12	UP
Pja2	4.85	4.63	4.06	72.04	71.56	70.91	3.48739	3.76131e-10	6.63084e-09	UP
Serpinf1	13.08	9.61	10.49	166.65	173.39	165.6	3.48619	2.78219e-21	1.3531e-19	UP
Prpf4b	1.61	1.62	1.5	30.32	31.82	30.44	3.48562	3.36944e-05	0.000246717	UP
Stxbp3	3.42	2.91	3.05	46.58	45.47	46.17	3.4855	4.30584e-07	4.78388e-06	UP
Ggnbp2	2.9	3.36	3.31	45.42	47.24	45.7	3.48543	4.2949e-07	4.77597e-06	UP
Mkln1	1.38	1.61	1.44	20.37	20.71	19.92	3.47476	0.000771612	0.00379401	UP
Aftph	3.3	3.05	3.84	49.61	52	50.01	3.47352	1.32275e-07	1.60828e-06	UP
Frk	2.55	1.45	1.57	30.08	31.18	29.68	3.47293	5.26002e-05	0.00036729	UP
Zzz3	2.15	1.71	1.87	30.83	31.22	29.18	3.47013	3.81011e-05	0.000275275	UP
Cbx3	12.34	10.16	9.4	155.69	158.33	152.79	3.46034	9.43057e-20	4.15045e-18	UP
A830082K12Rik	3.36	1.99	3.33	41.53	38.09	40.32	3.45535	2.81796e-06	2.61677e-05	UP
Chordc1	1.1	1.7	1.58	27.38	25.19	23.37	3.45332	0.000212378	0.00123639	UP
Gopc	1.85	1.92	1.16	24.18	26.33	24.98	3.45256	0.000204806	0.00119732	UP
Sucla2	6.11	5.68	5.91	93.05	88.28	87.48	3.44333	3.44442e-12	7.97255e-11	UP
Phkb	1.73	2.15	2.05	26.98	31.6	30.12	3.43738	5.03579e-05	0.000353808	UP
Zfp326	1.69	1.76	2.3	30.67	27.29	31.31	3.43731	4.98776e-05	0.00035142	UP
Rpe	4.12	3.75	2.51	56.28	53.63	52.83	3.43591	5.5041e-08	7.22984e-07	UP
Hdac2	8.17	7.54	6.87	110.48	111.84	117.89	3.43201	5.57197e-15	1.7411e-13	UP
Cul3	5.13	5.22	5.97	76.21	81.03	78.86	3.42977	6.69882e-11	1.33538e-09	UP
Atp13a3	2.48	2.87	2.59	39.68	39.34	39.16	3.4288	3.57667e-06	3.24418e-05	UP
Mbnl1	2.33	2.89	2.96	37.97	40.78	38.71	3.42871	3.63648e-06	3.29126e-05	UP
Zscan26	3.83	3.48	3.65	53.59	54.36	54.18	3.42839	5.69828e-08	7.45789e-07	UP
Armcx1	3.14	2.11	2.15	33.55	35.69	33.42	3.42726	1.46031e-05	0.000117153	UP
Jak2	1.09	1.53	1.4	19.76	20.21	19.47	3.42682	0.000984235	0.00469003	UP
Qki	2.63	2.39	2.4	34.62	33.24	35.04	3.42679	1.43542e-05	0.000115514	UP
Gmps	1.47	1.9	1.42	19.47	19.85	20.19	3.42629	0.000982339	0.00468278	UP
Plaa	1.31	2.98	2.26	29.18	28.79	30.19	3.41786	7.92576e-05	0.000526376	UP
Tmem106b	3.29	3.45	3.83	48.27	49.55	47.68	3.41543	2.66331e-07	3.06808e-06	UP
Kif2a	0.69	1.78	2.02	24.53	23.56	23.99	3.41363	0.000259462	0.00147678	UP
Arfgef1	2.76	2.32	1.82	33.62	34.18	33.75	3.41286	1.59943e-05	0.00012709	UP
Tank	1.53	1.96	2.17	29.12	28.78	29.17	3.40484	6.04144e-05	0.000415129	UP
Picalm	8.25	8.46	8.44	116.22	116.43	116.03	3.40484	2.64079e-15	8.5511e-14	UP
Cetn3	7.01	5.1	5.18	82.35	80.63	83.26	3.40259	3.78673e-11	7.73371e-10	UP
Slk	1.07	1.8	1.35	18.99	20.19	18.86	3.40193	0.00111096	0.00520849	UP
Tgfb2	23.06	23.55	24.36	342.23	337.13	348.02	3.40108	3.93413e-41	4.47025e-39	UP
Lrp6	3.81	3.25	3.4	48	48.36	47.7	3.39551	3.30615e-07	3.73616e-06	UP
Cd2ap	3.94	5.51	4.77	71.47	73.45	71.75	3.39353	6.12693e-10	1.04476e-08	UP
Eeig2	1.48	1.62	1.54	23.22	24.27	24.57	3.39311	0.0002934	0.00164596	UP
Il13ra1	3.28	3.02	3.16	43.35	44.76	40.94	3.38858	1.29148e-06	1.29448e-05	UP
Tent2	1.64	1.99	1.61	28.66	29.17	27.8	3.38839	6.85448e-05	0.000463354	UP
Nfat5	4.29	3.95	4.09	57.9	56.38	58.34	3.38808	2.36769e-08	3.32141e-07	UP
Nampt	4.54	4.44	3.3	54.62	59.38	57.99	3.38805	3.33753e-08	4.56262e-07	UP
Gmfb	3.78	4.22	4.05	55.51	57.59	58.15	3.38802	2.35959e-08	3.31377e-07	UP
Dld	6.01	4.62	5.05	74.67	74.61	78.59	3.38613	1.44724e-10	2.71199e-09	UP
Eif5	8.37	8.11	8.23	113.57	115	113.79	3.38398	4.72399e-15	1.48355e-13	UP
Larp7	2.23	1.34	1.39	17.59	19.53	19.08	3.38128	0.0012359	0.00572553	UP
Slc25a46	2.01	1	1.65	22.35	26.01	23.33	3.37728	0.000334385	0.0018559	UP
Gm14326	0.51	2.47	1.49	14.58	20.75	20.9	3.3753	0.00141031	0.00639835	UP
Syne2	3.87	3.32	3.83	51.75	52.89	51.33	3.37414	1.16921e-07	1.43274e-06	UP
Nr1d2	2.48	3.98	3.69	47.42	50.2	45.32	3.37372	6.73569e-07	7.25771e-06	UP
Trip4	1.1	2.45	2.21	22.49	25.11	24.03	3.37312	0.000335985	0.00186312	UP
Trappc2	2.14	2.39	1.07	21.28	24.1	25.57	3.37243	0.000347209	0.00191095	UP
F2r	2.45	1.99	2.22	27.52	26.83	29.54	3.37074	7.81807e-05	0.000521441	UP
Rbm6	3.31	2.56	2.77	40.74	43.92	42.23	3.36564	1.59199e-06	1.56433e-05	UP
Pkd2	3.26	2.71	3.11	39.85	45.02	41.87	3.36559	1.65119e-06	1.61488e-05	UP
Eif3a	6.46	6.86	6.66	91.89	95.72	93.14	3.35905	1.64458e-12	3.98365e-11	UP
Ntrk2	16.59	16.81	16.83	237.97	240.73	236.62	3.3583	3.62941e-29	2.56294e-27	UP
Fxr1	5.18	7.54	5.4	82.08	83.35	87.65	3.35725	5.04243e-11	1.0149e-09	UP
Ptpn12	1.96	1.04	1.53	22.82	23.64	23.48	3.35679	0.000363423	0.00198533	UP
Cdkl2	1.55	0.98	0.73	18.62	19.29	18.2	3.35619	0.00139028	0.00631665	UP
Inpp5f	1.94	1.51	1.39	22.19	25.62	22.12	3.35345	0.00039087	0.00210672	UP
Dpyd	0.99	1.58	1.09	18.36	19.87	17.56	3.35138	0.00143387	0.00646939	UP
Supt20	6.03	5.72	6.08	86.82	83.56	80.09	3.34893	2.54395e-11	5.29948e-10	UP
Cald1	4.77	6.04	6.15	78.56	78.33	80.46	3.34763	8.50645e-11	1.66649e-09	UP
Ppic	3.87	4.7	4.47	59.25	61.79	59.77	3.3453	1.38775e-08	2.03586e-07	UP
A530020G20Rik	7.19	6.84	6.24	93.59	90.36	93.54	3.34346	2.28759e-12	5.40502e-11	UP
Tmem117	5.76	5.29	5.51	75.18	80.71	79.94	3.34255	9.6071e-11	1.85881e-09	UP
Cul1	4.47	5.64	5.76	76.25	73.91	71.59	3.34069	5.09862e-10	8.82047e-09	UP
Map4k5	2.08	2.44	2.66	31.96	32.74	32.45	3.34033	2.91821e-05	0.000217889	UP
Bpnt2	2.45	3.23	3.12	36.46	36.8	37.88	3.34015	8.16576e-06	6.87762e-05	UP
Tpr	1.98	1.68	1.84	26.68	28.46	27.85	3.33679	9.81414e-05	0.000636824	UP
Cert1	1.69	1.96	1.76	27.46	27.62	27.87	3.33679	9.81414e-05	0.000636824	UP
Antxr1	2.03	2.42	2.11	27.4	28.05	27.9	3.33679	9.81414e-05	0.000636824	UP
Mindy2	2.03	2.34	2.23	26.72	28.49	27.58	3.33679	9.81414e-05	0.000636824	UP
Secisbp2l	4.02	4.1	4.2	56.23	52.96	56.69	3.33668	4.88544e-08	6.50993e-07	UP
Pbrm1	1.9	1.73	1.33	23.24	23.17	22.78	3.33228	0.000418768	0.00223779	UP
Arhgap29	1.54	1.85	1.35	21.74	23.91	22.54	3.3322	0.000422714	0.00225598	UP
Mob4	3.28	3.8	2.75	44.8	47.03	46.07	3.33215	7.04999e-07	7.57677e-06	UP
Peli1	1.09	1.87	1.66	22.46	22.85	23.71	3.33166	0.000422159	0.00225494	UP
Nek7	2.94	2.59	2.8	39.38	44.35	41.26	3.3311	2.35914e-06	2.22207e-05	UP
Pnpla8	3.02	2.54	2.65	40.28	41.48	42.88	3.33071	2.24696e-06	2.13248e-05	UP
Eps8	1.51	1.15	1.12	18.22	18.81	17.69	3.32999	0.00157158	0.00699791	UP
Rad17	1.84	1.13	1.15	18.4	17.66	19.35	3.3295	0.00156937	0.00699791	UP
Rbm26	1.13	0.96	1.55	17.58	17.81	19.29	3.32931	0.00157073	0.00699791	UP
Mllt3	2.46	1.2	0.88	15.92	18.57	19.72	3.32885	0.00163205	0.00718273	UP
Pik3r3	3.71	3.95	3.56	54.28	56.28	54.78	3.32818	5.38562e-08	7.09324e-07	UP
Zfp24	2.1	2.89	2.8	35.13	38.88	36.32	3.32746	9.56226e-06	7.92039e-05	UP
Iftap	0.56	3.37	3.81	35.07	35.96	38.86	3.32652	1.96445e-05	0.00015315	UP
Rimoc1	2.66	1.74	1.78	32.67	33.09	30.02	3.32603	3.3987e-05	0.000248423	UP
Nkapd1	1.36	1.86	1.44	18.97	17.75	18.15	3.32533	0.00160606	0.00710841	UP
Snx16	0.6	1.7	1.24	18.38	19.34	18.04	3.32524	0.00160564	0.00710841	UP
Ube2q2	2.88	3.14	3.55	47.37	46.6	43.38	3.32413	8.10461e-07	8.53408e-06	UP
Prpf38b	4.02	4.6	4.29	58.63	58.4	61.43	3.3209	1.93688e-08	2.76991e-07	UP
Tomm70a	2.16	2.43	2.33	27.47	27.26	27.68	3.31921	0.00011072	0.000706787	UP
Tmem87b	2.42	2.95	2.69	36.96	36.16	35.71	3.31431	1.03793e-05	8.55182e-05	UP
Krcc1	4.95	6.48	5.75	71.86	76.52	81.78	3.31004	2.0028e-10	3.70858e-09	UP
Gm20300	1.9	3.02	1.96	29.98	32.31	32.76	3.30707	3.86907e-05	0.000279051	UP
Sec63	3.8	3.9	3.32	48.08	50.25	50.81	3.30575	2.76268e-07	3.17086e-06	UP
Tbc1d15	1.99	1.27	1.15	18.06	18.49	17.71	3.3034	0.00177206	0.00769865	UP
Wapl	1.72	2.01	1.58	27.27	28.22	25.98	3.30207	0.000126586	0.000794276	UP
Chsy1	3.47	2.97	3.5	43.51	44.12	47.36	3.30191	9.6945e-07	9.98118e-06	UP
Kdm4c	2.26	2.12	2.12	26.47	26.55	28.27	3.30135	0.000125705	0.000790007	UP
Cnot7	5.9	5.09	4.67	70.4	74.31	71.4	3.29552	7.6061e-10	1.28298e-08	UP
Sec23a	2.84	1.77	2.37	31.68	30.23	32.4	3.2949	4.20391e-05	0.000300943	UP
Rab5a	6.3	6.65	5.46	80.03	82.18	79.77	3.29478	8.96415e-11	1.74794e-09	UP
Lgalsl	5.08	4.69	3.5	59.83	61.43	67	3.29296	9.25101e-09	1.38976e-07	UP
Ddx46	2.17	2.72	1.97	30.61	31.84	30.82	3.29234	4.31105e-05	0.000307908	UP
Smim10l1	3.3	4.78	4.07	54.77	49.56	55.97	3.29077	1.32818e-07	1.61259e-06	UP
Arl5a	6.3	6	5.76	79.47	82.18	80.14	3.28983	6.99321e-11	1.39185e-09	UP
Cacybp	4.86	3.87	4.06	58.95	54.41	60.56	3.28945	3.21953e-08	4.41238e-07	UP
Fam204a	1.91	2.19	2	28.2	25.2	27.18	3.28379	0.000144447	0.00088492	UP
Camta1	1.98	1.57	1.56	25.94	25.86	27.95	3.28333	0.000142349	0.000876462	UP
Hnrnpr	5.91	5.68	6.18	77.19	79.09	83.92	3.28331	8.14827e-11	1.59883e-09	UP
Ptcd3	1.15	2.76	2.09	26.32	26.62	26.94	3.28027	0.000204239	0.00119456	UP
Trappc8	1.73	1.24	1.16	17.94	17.97	16.56	3.27682	0.00201506	0.00858718	UP
Apc	1.04	1.4	1.69	17.42	18	17.56	3.27602	0.00201369	0.00858428	UP
Mia3	4.84	4.1	4.27	57.91	57.72	55.82	3.27343	3.78801e-08	5.14634e-07	UP
Rhobtb3	4.62	3.87	3.94	57.23	57.63	57.33	3.27325	3.71138e-08	5.05322e-07	UP
Eif3j1	0.94	1.88	1.4	17.09	18.07	18.17	3.27138	0.00205503	0.00871886	UP
Mfap1a	2.15	2.01	2.18	24.98	27.83	26.04	3.2657	0.000163241	0.000983301	UP
Gm14305	3.98	1.88	1.36	30.12	33.09	29.28	3.2647	0.000105547	0.000676185	UP
Dnajc3	8.54	8.65	8.34	113.07	116.67	112.5	3.26417	1.37642e-14	4.1455e-13	UP
Atf2	1.79	1.85	2.61	29.13	32.61	29.72	3.26403	5.52782e-05	0.000383419	UP
Ppp4r3a	1.62	1.73	2.6	29.34	29.58	33.32	3.26315	5.46442e-05	0.000379426	UP
Anapc4	2.23	3.2	2.5	29.93	31.13	31.22	3.26109	5.46721e-05	0.000379426	UP
Dram2	1.94	2.72	2.35	31.12	28.77	31.73	3.26084	5.55817e-05	0.000385311	UP
Tlk1	4.16	3.59	2.9	45.55	49.37	48.73	3.25653	5.03031e-07	5.52981e-06	UP
Eif2a	3.66	3.05	3.85	46.37	50.19	47.1	3.24854	5.55752e-07	6.06138e-06	UP
Hif1a	8.11	6.24	6.71	90.89	93.11	89.21	3.24846	6.66107e-12	1.47618e-10	UP
Cep70	1	1.45	1.97	17.07	17.17	18.09	3.24841	0.00228002	0.00952152	UP
Mphosph8	1.84	1	0.93	16.29	16.69	19.02	3.248	0.00232053	0.00966166	UP
Rps6ka3	2.09	2.06	1.69	26.18	26.17	26.04	3.24729	0.00018029	0.00107256	UP
Med13	1.69	1.61	1.58	26.07	26.4	25.95	3.24729	0.00018029	0.00107256	UP
Eif5b	2.07	1.85	1.91	25.32	27.09	26.39	3.24723	0.000181992	0.00108114	UP
Gnai3	8.88	8.79	7.91	111.42	116.38	111.18	3.24716	2.18929e-14	6.43857e-13	UP
Etfrf1	3.21	4.88	3.2	48.14	49.15	46.47	3.24516	8.00421e-07	8.44972e-06	UP
Orc2	0.97	1.74	1.43	16.35	16.6	19.04	3.2431	0.00236981	0.00983734	UP
Wsb1	6.01	6.52	6.53	83.53	87.39	88.05	3.24116	2.02468e-11	4.2532e-10	UP
Naa50	3.8	4.39	3.69	50.56	49.05	55.09	3.23741	1.85115e-07	2.1973e-06	UP
Vps35	6.98	6.46	7.09	85.37	89.89	82.99	3.23711	2.45335e-11	5.11927e-10	UP
Rnf2	2.92	2.72	2.82	37.68	38.07	40.26	3.23457	5.81365e-06	5.02182e-05	UP
Hnrnpa3	30.6	31.86	34.29	414.87	394.29	440.77	3.23416	2.74484e-46	3.68901e-44	UP
Exosc9	2.63	1.64	2.16	27.98	32.83	29.2	3.23253	7.21334e-05	0.000485773	UP
Sntb1	8.19	7.72	6.98	97.98	96.64	100.88	3.23225	8.31332e-13	2.08651e-11	UP
Mfap1b	3.18	2.54	4.18	44.31	41.01	43.06	3.22552	2.24488e-06	2.13212e-05	UP
Dars	6.86	6.29	5.91	78.83	83.26	81.17	3.22406	8.71416e-11	1.70451e-09	UP
Slc30a4	1.35	1.99	1.6	21.34	21.84	20.9	3.22366	0.000775957	0.00381238	UP
Gnpda2	2.54	1.76	2.48	29.14	28.18	32.06	3.21548	7.85316e-05	0.000522666	UP
Nemf	1.86	1.65	1.61	25.18	26.05	25.16	3.20991	0.00023145	0.00133252	UP
Wdr43	1.87	2.3	1.82	24.44	25.25	26.85	3.20914	0.000234582	0.00134807	UP
Actr2	7.29	6.25	7.08	82.73	86.09	84.32	3.20859	3.82636e-11	7.8019e-10	UP
Rab27b	1.7	3.24	1.44	25.34	25.19	25.82	3.20622	0.000328562	0.00182682	UP
Pds5a	1.54	1.33	1.53	20.54	21.02	20.67	3.2048	0.00085356	0.00413674	UP
Brinp1	1.67	1.37	1.54	20.36	20.28	22.71	3.20388	0.000875104	0.00423458	UP
Echdc1	0.9	2.06	1.63	19.5	20.58	21.89	3.20031	0.0008811	0.0042603	UP
Tcea1	6.2	9.68	8.15	97.18	105.33	100.43	3.19846	2.31379e-12	5.44633e-11	UP
Slmap	3.81	4.65	4.28	55.54	52.83	54.47	3.19421	1.15385e-07	1.4167e-06	UP
Ddx5	59.52	59.71	58.93	738.47	759.71	744.35	3.19357	6.9597e-81	1.9331e-78	UP
Ppp3ca	4.09	2.72	2.63	39.45	42.02	44.23	3.1908	3.27726e-06	2.99434e-05	UP
Crbn	1.97	2.42	1.81	25.09	24.72	25.19	3.19071	0.000260722	0.00148193	UP
Setbp1	2.29	2.14	1.81	24.67	25.14	24.67	3.19071	0.000260722	0.00148193	UP
Col8a1	2.06	1.97	2.27	24.73	25.33	24.52	3.19071	0.000260722	0.00148193	UP
Golga4	2.37	3.19	3.03	32.46	34.42	33.9	3.18958	3.06124e-05	0.000227212	UP
Copb1	6.99	9.76	6.86	95.51	102.75	100.35	3.18403	2.24022e-12	5.30312e-11	UP
Hnrnpu	8.21	9.97	9.37	110.02	111.92	114.48	3.18331	4.59724e-14	1.30002e-12	UP
Ckap5	1.52	1.53	1.41	20.67	21.26	20.2	3.1782	0.00099314	0.00472526	UP
Tcf12	4.69	4.23	3.98	54.46	54.67	51.52	3.17816	1.40257e-07	1.69543e-06	UP
Rybp	3.25	3.57	2.82	41.95	41.01	41.15	3.17788	3.70093e-06	3.33992e-05	UP
Stc1	1.36	1.6	2.03	20.43	20.76	20.61	3.17752	0.00099182	0.00472257	UP
Srp54b	2.52	2.02	2.04	28.68	32.04	25.17	3.16794	0.000125046	0.000786983	UP
Mier1	3.48	2.26	2.27	27.63	28.67	28.54	3.16662	0.000109584	0.000700248	UP
Hnrnpdl	11.07	9.33	10.37	117.88	127.14	122.84	3.16413	3.36816e-15	1.08502e-13	UP
C1galt1c1	3.51	4.84	5.56	59.76	60.38	64.03	3.16303	2.39759e-08	3.35959e-07	UP
Hmgb1	19.85	25.77	29.45	292.91	280.1	347.28	3.16179	9.76331e-30	7.13635e-28	UP
Galnt1	5.15	5.92	4.93	67.12	63.65	65.08	3.1608	7.37013e-09	1.12478e-07	UP
Fkbp3	8.11	11.79	7.79	110.95	108.06	123.63	3.15863	1.70339e-13	4.60837e-12	UP
Tmem29	1.95	1.48	2.19	21.33	19.59	20.37	3.15849	0.00109813	0.00516233	UP
Crot	2.72	2.7	2.77	33.7	37	38.63	3.15759	1.25088e-05	0.00010159	UP
Zfr	5.06	4.55	4.33	53.73	58.17	59.49	3.15649	6.56298e-08	8.47424e-07	UP
Map4k3	15.36	13.98	13.64	175.84	176.62	170.71	3.15437	6.58115e-21	3.11582e-19	UP
Htatsf1	4.22	4.13	3.08	43.46	45.98	45.42	3.1528	1.64761e-06	1.61265e-05	UP
Chd6	2.21	2	2.22	23.23	25.29	24.7	3.15138	0.000337566	0.00186857	UP
Tspan8	71.65	73.15	70.47	854.83	887.73	868.33	3.14889	3.19336e-91	1.02343e-88	UP
Nck1	2.45	2.98	3.46	27.77	32.83	36.29	3.14461	5.02204e-05	0.00035304	UP
Ugp2	9.03	8.29	7.32	96.87	97.59	95.46	3.14198	2.96948e-12	6.93747e-11	UP
Oga	5.48	7.23	5.94	68.79	74.81	73.11	3.13713	1.71759e-09	2.78085e-08	UP
Tnrc6a	2.31	2.28	2.1	23.66	23.72	23.88	3.13181	0.000377835	0.00204617	UP
Sox11	4.01	3.93	4.09	47.17	46.82	49.75	3.1314	6.53727e-07	7.05607e-06	UP
Cpeb2	2.19	1.78	1.73	23.12	23.86	24.9	3.13137	0.000380477	0.0020578	UP
Prrc2c	3.39	3.91	3.85	43.99	44.54	43.35	3.13135	2.09056e-06	2.00076e-05	UP
Relch	1.38	1.97	2.06	18.59	21.72	19.01	3.13074	0.00130746	0.00598988	UP
Katnbl1	1.9	2.8	1.66	28.11	28.44	27.89	3.12989	0.000143806	0.000882392	UP
Lgr4	4.58	4.5	4.91	56.34	54.96	55.9	3.12412	9.58652e-08	1.19942e-06	UP
Fndc3b	3.9	3.82	3.87	48.43	49.29	45.79	3.12208	7.54015e-07	8.02079e-06	UP
Vps4b	3.57	3.09	2.85	39.35	39.61	40.38	3.12035	6.43375e-06	5.52684e-05	UP
Vbp1	5.75	5.08	5.63	73.6	63.19	64.64	3.11889	6.79514e-09	1.03957e-07	UP
Zfp266	2.71	2.28	2.15	27.95	27.11	28.14	3.11546	0.000158068	0.000959074	UP
Pdcd4	5.17	5.73	5.47	60.93	62.9	65.5	3.1154	1.49054e-08	2.17136e-07	UP
Sarnp	7.61	6.38	6.7	76.93	88.05	83.65	3.11532	1.31343e-10	2.48671e-09	UP
Itgav	4.53	3.51	2.94	45.62	48.91	46.74	3.11171	1.10539e-06	1.12236e-05	UP
Phf6	1.69	1.98	1.32	19.52	20.95	18.44	3.10707	0.00147353	0.00662269	UP
Nfkbiz	5.39	4.46	5.25	55.35	55.09	54.78	3.10679	1.21417e-07	1.48347e-06	UP
Eps15	2.6	2.62	2.56	35.39	36.37	35.34	3.10491	1.94417e-05	0.000151781	UP
Tnfrsf11b	9.18	11.89	9.12	117.41	123.23	112.74	3.10236	5.02283e-14	1.40763e-12	UP
Gm56517	5.16	9.18	7.21	76.77	81.67	87.81	3.09999	4.34174e-10	7.61113e-09	UP
Dennd10	3	1.98	1.98	26.74	29.79	25.19	3.09882	0.000190965	0.00112641	UP
Tm9sf3	17.12	21.41	17.46	209.55	215.84	218.54	3.09736	2.8416e-24	1.58559e-22	UP
Ednra	2.39	1.98	2.4	22.03	23.9	24.23	3.09082	0.000490009	0.00256789	UP
Tmem30a	9.91	9.89	10.86	116.2	124.54	119.79	3.08867	1.006e-14	3.07433e-13	UP
Zfp317	1.79	2.15	1.41	17.9	19.56	19.93	3.0812	0.00164487	0.00722857	UP
Csde1	12.6	14.19	12.24	148.81	153.62	148.97	3.08116	7.26051e-18	2.80957e-16	UP
Eml4	1.37	2.46	1.98	19.37	18.92	19.85	3.08112	0.00162968	0.00717797	UP
Phf3	1.13	1.77	1.57	19.05	19.46	19.64	3.08112	0.00162968	0.00717797	UP
Spred1	3.85	4.07	3.91	45.8	45.95	46.68	3.08068	1.17206e-06	1.18524e-05	UP
Strbp	4.33	4.56	3.06	46.63	45.43	46.66	3.07899	1.62613e-06	1.59663e-05	UP
Adamts9	3.92	3.35	4.02	40.61	44.06	41.58	3.07736	3.66909e-06	3.31358e-05	UP
Acbd3	3.14	3.17	3.44	33.79	34.75	34.76	3.07724	2.46981e-05	0.000188348	UP
Cask	4.34	3.81	3.4	40.6	44.07	42.47	3.07552	3.81824e-06	3.43834e-05	UP
Nckap1	9.78	8.95	8.27	104.52	107.25	98.98	3.07318	9.67905e-13	2.40993e-11	UP
Psme4	1.52	1.98	1.95	23.47	23.21	22.73	3.07041	0.000548668	0.00283146	UP
Rab18	12.56	8.13	7.64	120.68	102.94	109.06	3.06996	1.38015e-12	3.38245e-11	UP
Ptbp2	1.56	3.18	2.69	32.87	28.18	30.92	3.06951	8.50498e-05	0.000562157	UP
Rnf146	4.29	4.39	3.17	45.21	44.92	35.65	3.06548	5.7042e-06	4.93745e-05	UP
Ccng1	8.28	7.46	7.47	82.96	85.37	83.89	3.065	9.16705e-11	1.78194e-09	UP
Crk	5.94	5.62	5.81	68.77	72.11	65.13	3.0639	4.88372e-09	7.58484e-08	UP
Ubxn2a	2.55	2.5	2.35	26.43	26.58	26.79	3.0623	0.000228037	0.00131529	UP
Pi4k2b	1.53	1.48	1.7	19.14	17.61	20	3.06005	0.00181645	0.00786961	UP
Ap3m1	4.83	3.04	2.16	37.62	30.43	45.73	3.05679	3.37644e-05	0.000247085	UP
Taf15	4.03	4.45	5.25	49.08	45.94	53.08	3.05568	6.93759e-07	7.46239e-06	UP
Hibch	1.79	2.34	1.11	19.1	17.34	20.75	3.05558	0.0019115	0.00821588	UP
Zc3h11a	9.49	8.99	8.59	99.23	106.28	102.22	3.05402	1.04041e-12	2.56998e-11	UP
Slc12a2	2.84	2.7	2.48	29.66	30.74	30.29	3.05391	9.04131e-05	0.000592903	UP
Kmt5b	3.49	3.12	2.06	28.71	29.63	31.59	3.05326	9.14182e-05	0.000598866	UP
Twist1	2.56	1.14	2.44	21.6	20.53	25.48	3.052	0.000845598	0.00410292	UP
Tra2a	7.82	8.99	7.95	88.12	97.05	99.46	3.05163	9.27221e-12	2.01554e-10	UP
Rdx	6.51	6.84	6.19	75.25	77.75	74.18	3.05131	8.91775e-10	1.48816e-08	UP
Tnfaip8	2.26	2.32	2.29	22.95	21.51	23.44	3.04924	0.000623326	0.00315423	UP
Fam13b	1.5	2.29	1.55	21.8	23.24	22.71	3.04916	0.000623037	0.00315405	UP
Prkaa1	2.08	1.62	1.82	22.21	22.66	22.56	3.04916	0.000623037	0.00315405	UP
Ptbp3	2.71	2.9	2.77	32.61	34.06	34.98	3.04903	3.16027e-05	0.00023304	UP
Tmem252	19.55	19.9	20.24	223.88	226.84	227.74	3.04713	5.86819e-26	3.5094e-24	UP
Akap8	6.29	4.7	5.7	64.5	64.5	64.25	3.04516	1.5541e-08	2.25344e-07	UP
Lmo7	2.9	2.34	2.42	26.42	26.91	26.48	3.0444	0.000258381	0.00147197	UP
Rbms1	2.78	3.55	3.43	36.54	35.36	40.84	3.04287	1.47559e-05	0.000118075	UP
Fam8a1	2.36	2.59	1.9	27.41	25.67	25.63	3.04145	0.000266085	0.0015083	UP
Ncl	6.57	6.45	5.89	69.73	71.6	72.42	3.04066	2.52867e-09	4.03651e-08	UP
Mmp2	19.87	18.7	17.53	210.24	218.09	213.7	3.04036	1.93358e-24	1.08376e-22	UP
Abhd17b	3.38	4.77	3.86	44.19	48.19	42.81	3.03722	2.79614e-06	2.59844e-05	UP
Aff4	4.7	4.44	4.16	48.28	49.83	47.94	3.03689	8.16969e-07	8.58092e-06	UP
Rlim	1.97	1.49	1.93	18.61	19.37	18.44	3.03535	0.00205086	0.00870708	UP
Veph1	3.62	4.82	3.78	49.11	48.03	48.59	3.0351	8.42763e-07	8.81481e-06	UP
Ift88	1.79	1.58	1.24	18.56	18.33	18.96	3.03085	0.00209273	0.00884878	UP
Brix1	1.94	1.8	2.01	22.6	22.02	21.65	3.02815	0.000707519	0.00352042	UP
Dnajc2	2.51	1.56	1.39	20.71	23.83	21.67	3.02814	0.000966433	0.00461576	UP
Usp25	2.25	2.42	2.17	21.9	23.06	21.69	3.02808	0.000707201	0.00352023	UP
Setd2	1.85	1.72	1.76	21.75	23.37	21.59	3.02808	0.000707201	0.00352023	UP
Slc25a24	1.85	1.9	2.05	21.5	22.39	22.82	3.02768	0.000705517	0.00351605	UP
Sulf1	20.61	19	19.19	221.22	218.08	219.39	3.02642	5.8875e-25	3.3449e-23	UP
Acbd7	5.64	2.25	2.14	40.68	42.31	27.69	3.02533	9.63115e-05	0.000626652	UP
Hnrnph2	6.17	9.16	8.81	87.58	91.23	87.89	3.02167	7.88878e-11	1.55034e-09	UP
Mtrex	2.42	2.54	3.01	29.33	29.86	29.9	3.02151	0.000115149	0.000733563	UP
Atp2c1	11.43	8.03	9.34	101.31	104.12	104.55	3.01649	1.50524e-12	3.66745e-11	UP
Acsl4	4.25	4.58	3.83	47.9	48.06	48.5	3.01524	1.06796e-06	1.09056e-05	UP
Vcan	1.56	1.22	2.26	20.32	17.98	16.8	3.00984	0.00237595	0.00985958	UP
Ccdc50	3.63	2.08	2.25	30.73	29.66	27.21	3.009	0.000169691	0.00101969	UP
Arl14ep	3.01	2.24	2.21	25.7	26.55	23.94	3.00793	0.000338608	0.00187308	UP
Pdcl	3.87	3.26	2.67	36.69	36.61	36.14	3.00719	1.91317e-05	0.000149548	UP
Daam1	2.52	2.1	2.15	25.19	25.98	25.62	3.00716	0.000329632	0.00183195	UP
Ddx52	2.12	1.54	2.12	22.27	22.09	21.79	3.00627	0.000798283	0.00390213	UP
Kat6b	2.03	1.65	1.76	21.7	22.26	21.61	3.00627	0.000798283	0.00390213	UP
Slc35a3	2.05	2.06	2.27	21.49	21.83	22.7	3.00579	0.000804354	0.00392902	UP
Ebf1	3.52	3.76	3.41	38.08	41.52	40.53	3.00542	7.94104e-06	6.71549e-05	UP
Ivns1abp	6.64	7.39	6.39	70.4	73.03	77.09	3.00541	2.03353e-09	3.27118e-08	UP
Tbc1d19	1.36	2.73	2.73	23.88	25.69	26.78	3.00345	0.000478378	0.00251652	UP
Mdm4	4.98	4.41	4.3	46.6	48.38	47.15	2.99677	1.30119e-06	1.30213e-05	UP
Ccdc25	3.9	3.59	2.92	38.75	42.65	38.34	2.99409	9.32946e-06	7.76875e-05	UP
Aebp2	3.9	3.82	3.34	40.41	41.06	39.14	2.99391	8.7702e-06	7.35203e-05	UP
Tlk2	3.73	3.49	1.92	33.07	33.01	31.84	2.99192	6.72609e-05	0.000456156	UP
Epm2aip1	2.57	2.92	2.82	33.4	32.11	33.23	2.99155	5.13553e-05	0.000359401	UP
Orc3	2.74	3	3.19	31.76	33.39	32.74	2.9915	5.13114e-05	0.000359295	UP
Fmnl2	3.16	2.72	2.37	29.71	28.41	28.67	2.98901	0.000148089	0.000903794	UP
Asph	4.56	5.52	4.82	57.01	58.53	58.48	2.98886	9.64846e-08	1.20596e-06	UP
Scyl2	2.26	3.25	2.65	27.73	29.9	28.79	2.98879	0.000148069	0.000903794	UP
Cfap36	4.67	3.58	3.51	47.59	47.43	45.67	2.98675	1.48576e-06	1.46687e-05	UP
Lum	127.59	138.41	124.52	1416.99	1423.38	1397.71	2.98455	4.19458e-127	2.01646e-124	UP
Pdzd8	2.27	1.77	2.2	20.88	22.82	21.05	2.98446	0.000918381	0.00441155	UP
Taf13	1.62	1.68	1.81	20.65	22.01	21.88	2.98406	0.000907154	0.00436769	UP
Srsf1	11.34	11.63	11.28	121.09	115.89	130.9	2.98187	1.81392e-14	5.39813e-13	UP
Steep1	2.67	3.26	3.54	32.08	38.13	37.68	2.97978	2.69714e-05	0.000203204	UP
Igf2	25.94	22.09	24.8	265.81	251.93	269.96	2.97955	9.40388e-29	6.38799e-27	UP
Myh10	3.12	2.77	3.29	31.44	32.97	32.9	2.97657	5.84557e-05	0.000402999	UP
Lrrn1	2.98	1.96	2.88	29.08	29.63	27.21	2.9754	0.000165583	0.000996446	UP
Dnaja1	12.12	10.85	10.71	118.97	123.77	122.62	2.97518	1.49539e-14	4.4715e-13	UP
Mfsd14b	4.48	5.42	3.99	46.75	46.88	45.93	2.97472	1.73465e-06	1.68858e-05	UP
Ublcp1	4.49	5.26	3.66	45.41	47.57	46.67	2.97445	1.75149e-06	1.70232e-05	UP
Capza2	8.95	8.3	7.31	84.2	88.1	86.44	2.9731	1.19554e-10	2.27791e-09	UP
Ibtk	3.09	2.28	2.2	24.8	25.62	24.12	2.96972	0.000426339	0.00227241	UP
Cse1l	3.18	4.12	4.1	37.98	42.32	38.33	2.9696	1.16442e-05	9.51251e-05	UP
Etnk1	9.48	10.48	9.89	102.25	106.95	101.81	2.96947	1.54755e-12	3.7632e-11	UP
Cpsf6	4.12	5.06	4.81	47.64	50.66	51.14	2.96751	7.72633e-07	8.19791e-06	UP
Arglu1	2.93	2.75	3.54	34.39	35.57	37.04	2.96663	2.77447e-05	0.000208653	UP
Tjp1	4.37	4.3	4.77	46.11	47.84	44.96	2.9661	1.91548e-06	1.84592e-05	UP
Golgb1	3.55	3.69	4.34	41.62	45.03	41.3	2.96219	4.63948e-06	4.08948e-05	UP
Hectd1	3.38	3.13	3.26	32.49	31.7	31.57	2.96187	6.5432e-05	0.000446173	UP
Gramd1c	3.43	3.2	2.84	32.92	30.21	32.89	2.96165	6.72349e-05	0.000456156	UP
Epyc	391.88	387.69	375.98	4077.46	4173.41	4065.8	2.96012	1.75208e-307	2.7374e-304	UP
Robo1	4.04	3.77	4.01	42.15	42.83	42.21	2.95061	4.99232e-06	4.37888e-05	UP
Ythdc1	4.6	3.62	4.13	46.07	44.58	46.23	2.94496	2.35551e-06	2.22032e-05	UP
Fbxo32	5.89	5.62	5.08	59.1	59.98	60.14	2.94272	7.61987e-08	9.72837e-07	UP
Uso1	6.16	5.71	5.66	60.88	66.12	62.35	2.93924	3.34011e-08	4.56262e-07	UP
Lrrc58	2.41	2.9	2.56	27.45	28.74	27.73	2.93814	0.000213596	0.00124289	UP
Tnks2	5.34	5.92	5.58	58.78	59.73	59.42	2.93469	8.65653e-08	1.09623e-06	UP
Ttc3	5.34	4.59	4.85	52.24	52.14	52.94	2.93444	4.36455e-07	4.8405e-06	UP
Cdk8	2.76	2.97	3.06	33.43	31.4	29.65	2.93196	8.61398e-05	0.000567261	UP
Gigyf2	3.47	3.09	3.15	30.9	32.42	31.01	2.93158	8.3951e-05	0.000555775	UP
Fbln2	7.07	6.62	7.91	77.23	75.11	77.47	2.92685	1.36056e-09	2.24053e-08	UP
Ccnt2	3.99	3.2	3.38	34.6	35.71	33.44	2.92655	4.04969e-05	0.00029107	UP
Rap1b	10.84	11.49	9.79	109.1	109.65	113.57	2.92572	3.33916e-13	8.69504e-12	UP
Rnf138	2.67	3.05	2.51	30.57	34.16	28.13	2.91692	0.0001046	0.000671228	UP
Shoc2	2.6	2.61	3.03	30.54	33.41	28.95	2.91664	9.91539e-05	0.000642137	UP
Parg	2.27	2.48	1.61	20.21	20.97	21.08	2.91587	0.00132318	0.00605622	UP
Acap2	2.1	1.63	1.5	21.19	18.97	21.64	2.91553	0.00134917	0.00615898	UP
Gm49486	3.22	4.65	4.55	44.49	45.11	45.14	2.91117	4.57715e-06	4.04309e-05	UP
Nalcn	2.67	2.09	2.2	23.98	23.88	23.92	2.91049	0.000609473	0.00310171	UP
Fam133b	2.7	2.01	2.24	22.92	24.87	24.5	2.91042	0.000615385	0.0031249	UP
Snap23	3.31	3.57	3.45	36.44	33.43	34.07	2.91012	4.70882e-05	0.000333082	UP
Pde5a	3.35	3.6	3.3	33.69	33.83	34.53	2.90977	4.58695e-05	0.000325382	UP
Tmem87a	3.96	5.17	4.84	47.42	49.05	47.66	2.90881	1.56161e-06	1.53811e-05	UP
Glce	2.84	2.63	2.34	27.01	26.77	28.19	2.9033	0.000270164	0.00152865	UP
Lats1	2.52	2.62	2.46	26.5	27.83	27.86	2.90324	0.000272783	0.00154137	UP
Mzt1	6.61	7.18	6.95	69.14	73.92	71.85	2.9026	4.77591e-09	7.44315e-08	UP
Dock7	4.91	4.63	4.93	50.5	51.88	51.2	2.8973	7.11383e-07	7.63226e-06	UP
Fundc1	6.72	6.98	5.5	64.72	69.02	70.21	2.89665	1.29833e-08	1.90916e-07	UP
Mtdh	3.61	3.44	3.51	35.31	37.61	38.51	2.89558	2.2497e-05	0.000172827	UP
Ctso	2.04	2.29	1.9	21.43	19.75	20.4	2.89281	0.00150381	0.00673938	UP
Ash1l	1.89	1.52	1.99	20.53	20.44	20.44	2.89281	0.00150381	0.00673938	UP
Iqgap2	2.03	1.74	2.45	19.98	20.98	20.48	2.89273	0.00150324	0.00673938	UP
Rock2	2.43	1.98	2.18	19.72	20.18	20.73	2.89229	0.00150024	0.00673061	UP
Sbno1	2.45	1.99	2.29	20.48	20.32	20.9	2.89229	0.00150024	0.00673061	UP
Dhx15	8.19	9.66	8.26	87.43	89.67	87.14	2.88971	1.50001e-10	2.80249e-09	UP
Tmx1	4.94	5.48	4.92	49.1	51.56	51.42	2.88775	8.09235e-07	8.52835e-06	UP
Kifap3	3.55	2.66	2.46	30.64	30.21	30.31	2.88493	0.000155381	0.000945064	UP
Macf1	2.77	2.68	2.77	30.44	31.46	30.41	2.88478	0.000121247	0.000766937	UP
Ugcg	3.02	3.04	2.58	30.03	29.05	32.26	2.8842	0.000122704	0.000775368	UP
Smarca2	7.51	10.96	9.17	94.31	103.98	85.25	2.88357	1.09451e-10	2.0982e-09	UP
Pls3	7.87	8.48	7.36	76.1	77.79	77.65	2.88084	1.45137e-09	2.38066e-08	UP
Kidins220	5.6	5.53	6.47	58.96	62.23	59.75	2.87676	8.19412e-08	1.04084e-06	UP
Mxra8	6.51	6.15	6.32	61.98	63.31	65.61	2.87637	3.84389e-08	5.20669e-07	UP
Wac	6.48	6.74	6.35	64.12	63.11	63.77	2.87551	4.02525e-08	5.43321e-07	UP
Pcnp	10.92	12.17	12.13	118.21	116.78	115.95	2.87273	1.32886e-13	3.61862e-12	UP
Herc4	2.65	1.1	1.91	20.03	20.06	20.22	2.87256	0.00216505	0.00910531	UP
Hnrnpa2b1	77.19	75.5	72.9	731.43	743.47	788.97	2.87013	2.88766e-73	7.21856e-71	UP
Tlr3	2.73	2.68	3.21	29.98	31.71	28.17	2.86935	0.0001432	0.000879864	UP
Armcx3	6.25	5.82	5.63	61.35	61.21	58.25	2.86908	9.48503e-08	1.1891e-06	UP
Usp47	3.94	3.63	3.56	39.42	40.13	40.65	2.8685	1.15858e-05	9.47719e-05	UP
Vav3	3.33	2.62	2.27	26.46	27.71	25.85	2.86808	0.000350076	0.00192334	UP
Wasl	3.72	5.15	5.13	44.64	46.23	48.97	2.86769	2.55076e-06	2.38995e-05	UP
Cnep1r1	4.84	6.32	4.5	47.51	50.97	51.18	2.86704	1.35827e-06	1.35059e-05	UP
Dipk1a	8.89	9.92	8.33	93.24	91.19	84.87	2.8631	1.35291e-10	2.55053e-09	UP
Eif4a2	54.99	56.29	52.09	529.16	548.24	538.43	2.85515	1.19769e-53	2.05067e-51	UP
Eif3e	35.96	36.53	36.65	354.46	368.31	365.5	2.85273	1.05051e-37	1.08515e-35	UP
Otud6b	3.18	2.15	2.76	27.44	26.34	25.63	2.85259	0.000381018	0.00205984	UP
Epha4	1.88	1.8	2.18	20.01	20.36	19.09	2.84484	0.00193743	0.0082903	UP
Stam	2.44	2.2	2.48	19.53	19.6	18.62	2.84484	0.00193743	0.0082903	UP
Nab1	2.47	1.63	2.11	19.14	20.5	20.35	2.84431	0.00193314	0.00827762	UP
Lypd6	1.99	1.99	2.29	18.68	20.21	19.77	2.84431	0.00193314	0.00827762	UP
Ift57	3.49	4.13	3.8	35.82	38.12	34.45	2.84206	3.8488e-05	0.00027791	UP
Emp1	15.79	17.43	14.25	157.14	150.33	153.59	2.84024	7.00311e-17	2.52982e-15	UP
4921524J17Rik	2.73	3.97	3.46	34.34	31.11	32.83	2.83811	8.59465e-05	0.000566585	UP
Nap1l1	14.08	17.93	11.57	142.73	147.16	141.12	2.83726	4.08126e-15	1.29471e-13	UP
Kif3a	2.75	2.87	2.87	29.38	30.24	28.76	2.83642	0.000175212	0.00104934	UP
Dhx40	3.12	2.48	2.78	25.61	27.3	25.24	2.83441	0.000434504	0.00230806	UP
Kiz	1.86	2.34	2.89	23.46	23.56	20.78	2.8286	0.00102992	0.00487393	UP
Bzw1	19.97	19.49	18.93	186.33	189.38	189.24	2.82847	1.4233e-20	6.58884e-19	UP
Tnks	2.54	2.27	2.37	22.79	23.1	22.45	2.82833	0.00100545	0.00477473	UP
Klhl9	6.12	6.39	6.34	58.49	59.49	57.99	2.82815	1.63884e-07	1.96394e-06	UP
Tgfbi	3.77	5.54	4.6	48.34	48.39	49.98	2.82795	2.14136e-06	2.04624e-05	UP
Apod	18.85	15.82	14.78	155.84	161.52	168.06	2.82773	1.38598e-17	5.20222e-16	UP
Rai14	3.49	3.83	3.19	32.23	33.14	31.96	2.8234	9.52228e-05	0.000621834	UP
Canx	28.77	32.04	29.21	284.06	295.11	292.29	2.82088	5.49068e-30	4.06083e-28	UP
Olfml3	1.72	1.58	1.87	19.45	18.47	20.52	2.81906	0.00223487	0.00934548	UP
Ubr3	1.69	1.57	1.62	19.32	17.78	21.05	2.81906	0.00223487	0.00934548	UP
Fam114a1	5.5	3.73	4.38	44.68	45.14	45.02	2.81744	5.33971e-06	4.64124e-05	UP
Adam17	3.59	3.19	3.28	32.03	31.25	33	2.81037	0.000104063	0.000668731	UP
Ift25	2.24	0.64	3.82	26.32	17.51	23.35	2.81011	0.00208411	0.00881829	UP
Tceal9	42.1	42.26	40.08	379.62	403.49	405.64	2.80775	6.57225e-40	7.14317e-38	UP
Arl6	2.98	1.68	2.27	23.99	22.02	20.51	2.80734	0.00116376	0.00542348	UP
Fam172a	2.91	2.9	2.56	28.85	28.57	28.41	2.80339	0.000224406	0.00129734	UP
Cggbp1	5.36	6.15	4.82	48.16	53.53	50.81	2.80316	1.24763e-06	1.25456e-05	UP
Nfib	5.5	6.13	6.32	57.54	53.98	59.86	2.80277	2.48753e-07	2.88419e-06	UP
Topors	2.76	3.26	2.68	26.25	30.09	30.28	2.8026	0.000234156	0.00134623	UP
Vma21	4.3	3.81	3.22	36.16	34.07	35.2	2.80105	5.30709e-05	0.000370163	UP
Tardbp	13.62	18.71	15.58	152.73	156.39	159.21	2.80094	1.55363e-16	5.43946e-15	UP
Cltc	12.77	13	12.69	123.08	126.1	123.16	2.80064	4.72514e-14	1.3304e-12	UP
Cab39	7	5.94	6.21	58.83	61.03	61.25	2.79903	1.23748e-07	1.50606e-06	UP
Pan3	3.15	2.5	2.74	25.22	25.22	25.51	2.79635	0.000549047	0.00283225	UP
Msl2	3.55	3.25	3.17	32.83	31.8	30	2.79608	0.000120583	0.000763506	UP
Oip5os1	5.69	5.07	5.62	52.54	53.17	55.46	2.79092	6.09833e-07	6.5994e-06	UP
Ola1	5.55	4.56	4.36	46.78	46.34	48.64	2.78942	3.29161e-06	3.00306e-05	UP
Tmed5	2.1	1.05	4.05	22.58	22.33	20.82	2.78881	0.00203884	0.00867376	UP
Rnf13	7.54	9.06	9.09	79.99	83.98	82.44	2.78854	8.99253e-10	1.49864e-08	UP
Snx2	11.86	13.01	11.91	114.74	117.57	116.63	2.78812	3.13681e-13	8.2023e-12	UP
Cog5	2.18	2.77	1.99	21.84	22.52	21.15	2.78214	0.00133164	0.00608784	UP
Hnrnpm	13.05	13.36	14.29	125.4	123.14	128.18	2.77947	4.25306e-14	1.21368e-12	UP
Nr2f2	5.44	4.39	3.67	43.33	36.99	41.58	2.77755	1.5622e-05	0.000124448	UP
Ypel2	4.51	3.68	4.34	40.2	36.99	44.97	2.77677	1.61337e-05	0.000127954	UP
Eprs	6.12	5.1	4.76	49.1	50.69	49.67	2.77611	1.5749e-06	1.54998e-05	UP
Ankrd6	4.69	5.58	5.41	50.37	50.27	49.91	2.77469	1.6384e-06	1.60489e-05	UP
Smc1a	4.21	4.8	5.01	43.56	44.81	41.65	2.77267	7.53937e-06	6.40181e-05	UP
Gm14325	0.48	10.96	5.06	47.71	50.77	51.79	2.77093	0.0016837	0.00736853	UP
Ccnh	2.83	2.53	3.24	30.34	28.56	25.05	2.77028	0.000310235	0.00173651	UP
Itgb1	29.79	32.52	28.1	276	283.45	290.65	2.76936	1.6281e-28	1.09998e-26	UP
Kdm3a	2.99	2.91	3.36	27.32	28.45	28.75	2.76884	0.000286902	0.00161313	UP
Ssr3	23.54	22.18	21.77	209.41	217.59	207.4	2.7681	3.63474e-22	1.83929e-20	UP
Rbm7	4.95	5.98	4.38	46.05	48.32	45.9	2.7678	4.38849e-06	3.90126e-05	UP
Fbxo3	5.85	4.96	4.8	48.2	50.06	50.95	2.7662	1.77614e-06	1.7236e-05	UP
Cfap418	3.81	3.09	3.36	29.42	35.22	29.17	2.76533	0.000167941	0.00100967	UP
Rsl1d1	8.97	6.48	9.39	73.32	74.32	76.29	2.76449	9.21664e-09	1.38794e-07	UP
Atf1	3.42	3.85	2.89	30.24	32.88	30.01	2.76277	0.000158957	0.000963063	UP
Amd1	34.71	33.83	32.7	313.12	320.67	312.26	2.76018	5.11359e-32	4.0971e-30	UP
Msantd2	2.46	2.54	2.15	22.8	19.64	21.57	2.75966	0.0015247	0.00682567	UP
Cbfb	8.14	8.71	8.75	81.5	76.92	81.91	2.75881	1.65525e-09	2.69037e-08	UP
Fzd1	5.43	4.54	4.93	46.85	43.73	47.73	2.75858	3.87535e-06	3.48224e-05	UP
G3bp2	8.26	10.83	10.73	95.2	92.9	89.8	2.75832	1.93172e-10	3.58227e-09	UP
Tceal8	15.9	17.24	16.39	151.16	151	152.14	2.7583	1.68014e-16	5.86595e-15	UP
Celf2	3.02	5.1	3.25	35.64	32.42	34.34	2.75707	9.97246e-05	0.000645164	UP
Maml2	2.91	2.57	2.31	24.94	24.08	25.39	2.7553	0.000722192	0.00358059	UP
Tra2b	14.02	12.35	10.84	112.76	106.13	122.29	2.75058	1.78707e-12	4.31209e-11	UP
Srsf11	11.22	8.98	11.35	92.57	97.25	95.37	2.74841	6.60938e-11	1.32177e-09	UP
Pdia3	82.73	90.14	82.55	785.15	790.1	775.1	2.74488	5.53337e-71	1.33003e-68	UP
Limch1	4.35	3.88	4.18	35.57	36.95	36.78	2.74311	3.86855e-05	0.000279051	UP
Sema6d	2.67	2.18	2.42	22.13	20.92	20.81	2.7408	0.00165109	0.00725123	UP
Tdp2	1.69	3.05	2.41	23.8	20.93	19.42	2.73846	0.00180572	0.00783396	UP
Utrn	6.11	4.82	5.27	47.85	48.93	48.62	2.73707	2.50909e-06	2.35444e-05	UP
Pcmtd2	6.01	4.88	4.66	46.36	49.27	50.98	2.73664	2.61323e-06	2.44399e-05	UP
Lrrfip1	9.23	9.14	9.44	80.69	82.67	82.39	2.73443	1.15388e-09	1.91278e-08	UP
Hipk3	3.06	2.99	3.27	26.79	27.35	28.28	2.73422	0.000365078	0.00199159	UP
Rspo2	3.16	2.8	3.11	27.36	27.46	27.53	2.73422	0.000365078	0.00199159	UP
Enah	12.67	12.53	12.17	113.78	112.83	118.93	2.73303	6.96773e-13	1.75939e-11	UP
Tmod3	9.38	10.61	9.81	88.98	91.9	91.96	2.73175	2.01004e-10	3.71649e-09	UP
Cpeb4	5.13	4.48	4.32	38.56	40.19	38.54	2.72971	2.29731e-05	0.000176291	UP
Son	16.39	18.38	17.9	152.21	156.68	161.3	2.72227	1.05068e-16	3.74144e-15	UP
Pls1	4.69	5.26	4.66	45.05	46.59	43.18	2.71714	6.37963e-06	5.48411e-05	UP
Supt16	3.54	3.63	3.96	35.92	36.08	36.29	2.71675	4.92107e-05	0.000346917	UP
Aqp1	3.16	4.07	3.03	30.27	29.15	31.39	2.71492	0.000222616	0.00128938	UP
Rbbp9	6.21	4.63	5.96	49.54	53.08	49.32	2.70846	1.86672e-06	1.80449e-05	UP
Ccpg1	12.91	9.6	9.59	98.18	99.42	96.85	2.70295	6.62863e-11	1.3235e-09	UP
Golga5	3.13	2.76	3.58	28.9	30.23	30.17	2.70121	0.000242743	0.00139304	UP
Ggps1	3.91	3.27	3.27	29.05	28.57	31.14	2.701	0.000243883	0.00139894	UP
Xpr1	2.2	2.32	3.08	20.61	21.62	19.21	2.69542	0.00216955	0.0091187	UP
Parp8	2.42	2.03	2.69	19.55	21.33	21.04	2.69448	0.00211569	0.00892942	UP
Prrg3	6.69	6.47	5.3	54.48	52.14	53.03	2.68986	1.33315e-06	1.32872e-05	UP
Itch	3.1	4.19	4.01	32.27	33.54	31.14	2.6869	0.000141846	0.000874225	UP
Cyrib	3.77	3.38	3.37	28.39	30.33	29.73	2.68486	0.000276057	0.00155846	UP
Cfdp1	6.46	12.93	13.16	92.62	88.92	99.91	2.68359	4.82556e-09	7.51116e-08	UP
Xrn2	3.78	4.19	4.57	37.44	39.38	38.16	2.67978	3.72753e-05	0.000270717	UP
Sptbn1	18.27	17.41	17.08	151.02	152.28	153.21	2.67936	3.45071e-16	1.18817e-14	UP
Plekha1	3.87	2.46	1.93	22.74	21.52	24.54	2.67755	0.00142007	0.00643284	UP
Nucb2	12.53	8.88	9.57	91.73	94	94.34	2.67732	2.72307e-10	4.91844e-09	UP
Txndc16	6.06	7.13	7.21	57.89	58.56	58.33	2.67573	3.78248e-07	4.25155e-06	UP
Eef1akmt2	1.99	3	2.83	22.07	21.74	26.02	2.67397	0.0012329	0.00571802	UP
Trip12	5.13	5.43	5.24	42.74	44.59	42.84	2.67346	9.90926e-06	8.19153e-05	UP
Zfp869	3.87	3.51	3.38	32.67	33.43	30.08	2.67229	0.000161576	0.000975622	UP
Dcun1d4	2.84	2.21	2.13	20.37	20.74	19.74	2.67148	0.00239721	0.00993129	UP
Cep15	4.6	4.68	3.68	40.62	41.46	39.97	2.66984	2.13836e-05	0.000165086	UP
Eif4g2	38.68	37.92	34.22	317.39	326.6	322.27	2.66805	4.25051e-31	3.32044e-29	UP
Nedd4	53.73	52.77	53.09	464.64	476.17	449.19	2.66609	2.67385e-43	3.27651e-41	UP
Fermt2	11.81	11.03	10.88	97.37	100.86	96.78	2.66427	5.66639e-11	1.13865e-09	UP
Gm9860	3.09	2.81	3.06	25.77	26.91	24.71	2.66263	0.000604807	0.00307922	UP
Mfap3l	1.98	2.54	3.62	25.89	26.23	25.83	2.66218	0.000738253	0.00364432	UP
Epha7	13.23	14.33	13.25	115.15	115.44	114.88	2.65494	1.63547e-12	3.96928e-11	UP
Ecpas	3.39	2.51	2.43	22.47	25.2	21.88	2.65474	0.00137469	0.0062549	UP
Fam91a1	4.74	5.56	5	45.58	47.99	44	2.65474	7.12952e-06	6.10355e-05	UP
Ergic2	3.22	2.54	2.38	21.92	22.33	24.96	2.65359	0.00136458	0.00622249	UP
Hnrnpll	6.25	4.41	4.71	42.42	43.14	43.77	2.65252	1.44666e-05	0.000116207	UP
Snhg5	3.92	2.8	2.75	29.18	26.35	31.06	2.65128	0.000368254	0.00200558	UP
Pik3r1	4.9	4.72	4.51	43.43	42.84	43.49	2.65115	1.23673e-05	0.000100507	UP
Gm38604	6.86	6.56	6.85	61.06	60.36	58.87	2.64653	2.83939e-07	3.24698e-06	UP
Ptpn2	4.82	5.01	3.87	41.68	38.68	39.1	2.64613	2.79252e-05	0.000209884	UP
Srgap1	3.37	2.84	3.2	25.54	26.2	24.97	2.64393	0.000678801	0.00341147	UP
Cyp2j6	5.97	6.13	5.82	51.34	52.37	50.73	2.64372	1.96309e-06	1.88599e-05	UP
Agr3	5.73	2.45	4.43	39.38	29.61	33.3	2.63922	0.000257718	0.00146886	UP
Sdr16c5	14.27	13.57	13.31	115.71	114.45	118.83	2.63595	1.43642e-12	3.5066e-11	UP
Kmt2e	4.38	4.39	3.92	32.82	33.67	34.52	2.63397	0.000101957	0.000657224	UP
Ncoa2	3.45	2.84	2.41	22.28	23.54	21.85	2.63358	0.00152848	0.00684012	UP
Cct8	15.9	12.22	12.96	113.79	120.93	113.48	2.63344	3.35474e-12	7.79384e-11	UP
Vps41	5.23	5.27	4.63	40.89	45.45	40.59	2.62883	1.66313e-05	0.000131649	UP
Cdr2	4.16	3.22	3.55	30.83	31.11	30.53	2.62796	0.000216114	0.00125521	UP
Akap13	2.53	2.55	3.06	24.59	26.25	25.33	2.62491	0.000766554	0.00377211	UP
Ccnl1	9.79	8.38	7.47	69.74	69.57	70.69	2.62435	4.78437e-08	6.39571e-07	UP
Ppfibp1	13.91	11.89	13.35	110.73	108.83	108.58	2.62406	7.05497e-12	1.55795e-10	UP
Mtmr6	4.53	4.06	2.55	34.31	32.39	34.6	2.61981	0.000141562	0.000872908	UP
Adam9	3.26	2.62	3.74	28.04	28.47	28.26	2.61794	0.000444615	0.00235476	UP
Mex3c	3.83	3.58	3.21	31.26	30.68	30.03	2.61048	0.000252952	0.00144433	UP
Ubr5	3.76	3.68	3.23	31.18	30.17	31.08	2.6102	0.000251929	0.00144099	UP
Nid1	6.76	6.85	7.78	61	61.76	60.3	2.60357	3.00245e-07	3.41781e-06	UP
Snx5	10.18	14.14	10.95	94.56	98.9	97.1	2.60067	3.09382e-10	5.54006e-09	UP
Rab1a	16.43	15.57	17.24	124.28	139.43	144.2	2.60045	6.67006e-14	1.85677e-12	UP
Gm15387	22.07	22.14	26.15	208.42	251.91	118.73	2.59934	1.38532e-10	2.6004e-09	UP
Mia2	5.77	5.85	5.6	48.96	51.42	48.96	2.59615	3.57974e-06	3.24461e-05	UP
Tut7	3.7	3.63	2.96	30.05	30.51	29.7	2.59458	0.000284733	0.00160238	UP
Zfand5	11.58	11.19	11.45	89.96	97.08	94.41	2.59393	2.90923e-10	5.2245e-09	UP
P2ry1	2.55	1.89	3.13	21.84	23.13	21.45	2.59357	0.00190433	0.00819338	UP
Lrp12	3.41	2.49	3.19	21.2	22.6	22.13	2.59309	0.00189915	0.00817407	UP
Gnl2	3.53	5.5	5.18	40.53	43.03	39.85	2.59273	2.89962e-05	0.00021676	UP
Hspd1	17.42	17.9	15.88	138.66	138.29	144.2	2.59134	1.69979e-14	5.07057e-13	UP
Oxr1	6.7	5.68	7.67	57.12	56.87	58.67	2.59003	7.17604e-07	7.67922e-06	UP
Rbms3	4.52	4.14	4.31	35.84	35.1	36.3	2.58842	8.52813e-05	0.000562605	UP
Rida	25.16	21.7	18.72	179.35	180.69	181.95	2.58452	1.36844e-17	5.15186e-16	UP
Mapk6	3.7	5.19	4.81	39.32	37.53	37.95	2.58445	4.90656e-05	0.000346089	UP
Clcn3	4.01	4.51	4.63	38.08	37.67	38.87	2.58418	4.87414e-05	0.000344191	UP
Nfyb	3.09	3.47	4.18	25.55	27.63	27.64	2.58288	0.000572565	0.00294022	UP
Ccdc90b	4.85	6.15	5.39	45.09	39.92	45.63	2.5788	1.6838e-05	0.000133033	UP
Glt8d1	5.65	5.56	6.44	46.68	48.68	50.77	2.57613	4.5446e-06	4.01718e-05	UP
Btbd3	3.52	4.65	3.46	32.77	32.16	32.74	2.5745	0.000205563	0.00120006	UP
Paip1	11.4	10.85	11.78	86.64	96.87	92.86	2.57315	5.15299e-10	8.88376e-09	UP
Vps26a	6.96	7.4	6.56	56.75	59.59	54.27	2.57281	8.91421e-07	9.2387e-06	UP
Azin1	4.89	5.79	5.49	43.7	42.39	44.44	2.56806	1.75104e-05	0.000137996	UP
Rnf139	3	3.05	2.57	23.94	24.63	23.62	2.56681	0.00110872	0.0052019	UP
Arhgef9	4.06	3.42	3.65	30.63	29.78	28.16	2.56513	0.000360945	0.00197265	UP
Ss18	9.42	9.84	11.09	78.31	81.92	83.43	2.56442	5.92351e-09	9.11797e-08	UP
Snrpb2	3.14	3.52	3.05	27.15	26.31	27.81	2.56282	0.000661923	0.00333219	UP
Esyt2	3.78	3.59	3.33	30.55	29.2	28.54	2.5627	0.000366541	0.00199712	UP
Kat2b	4.01	3.95	3.46	28.1	31.64	29.29	2.56253	0.000376464	0.0020414	UP
Ptk2	4.14	4.43	3.68	30.85	33.85	32.17	2.56178	0.000189816	0.00112122	UP
Cibar1	3.08	4.46	2.98	24	25.82	31.44	2.56162	0.000733279	0.0036255	UP
Gm28439	78.96	81.83	38.56	474.42	525.69	622.06	2.5616	5.25514e-18	2.05262e-16	UP
Rbbp6	3.59	4.23	3.96	31.24	32.52	33.47	2.56151	0.000187181	0.00110828	UP
Fnbp4	3.96	3.23	3.58	29.84	29.47	29.16	2.5484	0.000396839	0.00213337	UP
Lypla1	5.78	6.12	6.92	52.63	52.33	46.66	2.54793	4.24216e-06	3.78194e-05	UP
Ahsa2	4.03	2.57	2.95	26.65	24.63	28.11	2.54724	0.000735315	0.00363413	UP
Thumpd3	2.76	2.7	2.58	24.29	25.05	23.37	2.54718	0.00126487	0.00582519	UP
Prxl2c	2.67	2.86	2.63	23.57	24.1	24.5	2.54681	0.00124863	0.00577595	UP
Kat6a	3.47	3.25	2.75	24.17	24.39	23.79	2.54681	0.00124863	0.00577595	UP
Myo6	3.62	3.65	4.07	30.82	32.84	31.84	2.54676	0.000211064	0.0012293	UP
Ankrd17	2.71	2.62	2.93	24.13	22.9	24.64	2.54645	0.00125795	0.00580817	UP
Gfpt1	5	6.55	6.03	46.34	49.59	48.1	2.54534	8.18938e-06	6.89286e-05	UP
Zfp521	2.19	3.54	3.27	24.65	22.73	23.84	2.54409	0.00157103	0.00699791	UP
Fn1	43.75	42.93	44.8	353.76	355.54	340.96	2.5404	3.11801e-32	2.53065e-30	UP
Zc3h14	7.84	8.96	9.02	69.63	70.87	65.93	2.53993	8.78745e-08	1.11056e-06	UP
Twsg1	21.95	20.15	21.07	166.41	169.04	166.04	2.53864	1.13871e-16	4.03193e-15	UP
Zbtb20	5.4	5.85	5.64	44.93	44.31	46.33	2.53546	1.37165e-05	0.000110823	UP
Penk	19.26	16.32	19.09	144.05	141.17	142.69	2.5343	2.22279e-14	6.52175e-13	UP
Mr1	2.79	4.2	2.73	26.73	26.97	25.21	2.52754	0.00085239	0.00413267	UP
Wdr26	5.96	5.93	5.79	48.01	46.94	47.44	2.52672	8.06184e-06	6.80385e-05	UP
Trim2	4.95	5.56	4.63	39.94	42.93	42.61	2.52278	2.83162e-05	0.000212312	UP
Cd164	37.82	40.95	35.36	293.38	305.92	294.89	2.51742	8.21794e-27	5.16161e-25	UP
Ppp3r1	7.67	10.14	8.3	65.99	69.35	68.61	2.51733	1.41191e-07	1.70507e-06	UP
Rmnd5a	3.65	3.52	3.87	31.68	30.89	31.02	2.51657	0.000267392	0.00151433	UP
Cept1	7.11	7.92	6.57	57.47	57.6	56.52	2.51294	1.11457e-06	1.13077e-05	UP
Sesn3	5.29	6.52	5.35	44.34	43.97	44.89	2.51253	2.11562e-05	0.000163532	UP
Dnajc10	8.66	7.08	7.46	57.02	63.04	58.84	2.50785	8.39809e-07	8.79445e-06	UP
Nasp	6.79	5.48	6.19	44.63	47.65	47.21	2.50744	1.17049e-05	9.54962e-05	UP
Ccser2	2.91	2.88	2.96	23.62	24.09	22.1	2.50672	0.00162485	0.00717125	UP
Cnot2	8.58	6.81	6	56.31	59.18	55.61	2.5058	1.69734e-06	1.65613e-05	UP
Cast	4.2	4.87	4.47	33.5	34.04	33.15	2.50352	0.000181004	0.00107629	UP
Chmp1b	3.62	4.75	4.04	30.61	34.88	34.83	2.50284	0.000188005	0.00111263	UP
Map3k7	3.95	3.52	3.61	29.18	32.65	31.02	2.5009	0.000311557	0.00174313	UP
Pafah1b1	7.08	9.32	9.18	64.81	63.67	64.19	2.49476	3.39532e-07	3.83015e-06	UP
1110059E24Rik	3.73	5.26	4.81	33.73	40.32	34.1	2.49411	0.000125716	0.000790007	UP
Slain2	3.77	2.78	3.22	25.71	25.98	25.45	2.49278	0.00104263	0.00492696	UP
Elf1	6.92	6.69	6.11	51.52	51.12	51.13	2.49136	4.35726e-06	3.87625e-05	UP
Col16a1	6.37	6.57	7.04	51.48	50.53	51.72	2.4911	4.32389e-06	3.85205e-05	UP
Tipin	3.63	4.08	4.94	33.42	34.21	33.04	2.49088	0.000196958	0.00115957	UP
Mdk	5.39	14.97	10.6	82.29	81.09	75.95	2.48909	1.07229e-06	1.09409e-05	UP
Eloc	8.08	12.36	8.85	74.58	70.72	77.13	2.4873	8.13993e-08	1.03501e-06	UP
Rnf20	4.41	4.04	4.41	28.75	32.86	30.11	2.48551	0.000353207	0.00193629	UP
Zfand6	11.62	12.47	14.12	91.59	100.27	98.73	2.4839	4.42561e-10	7.7473e-09	UP
Slc35a5	3.98	3.35	3.53	28.59	28.42	26.87	2.48155	0.000647768	0.0032647	UP
Chmp4c	5.25	4.71	4.4	34.64	36.65	34.52	2.4805	0.000127373	0.000798013	UP
Tmem65	5.21	4.66	4.01	35.47	36.8	34.6	2.4805	0.000127373	0.000798013	UP
Nus1	4.55	4.76	3.98	34.21	35.85	36.54	2.47996	0.000127261	0.000798013	UP
Alg10b	3.79	4.36	3.2	27.75	28.39	27.65	2.479	0.000656797	0.00330887	UP
Cav2	5.24	4.04	3.98	33.39	35.32	31.1	2.47693	0.000231265	0.00133206	UP
Trappc13	4.9	3.75	3.82	34.22	33.05	32.23	2.47671	0.000223845	0.0012953	UP
Api5	8.49	6.54	6.36	54.12	52.37	54.25	2.47637	3.39216e-06	3.09253e-05	UP
Agps	4.11	4.91	4.21	32.59	33.24	33.24	2.47446	0.00022785	0.00131482	UP
Shtn1	4.67	5.18	4.87	38.8	37.02	37.95	2.47285	7.41229e-05	0.000498098	UP
Bbip1	8.58	10.01	5.76	70	64.97	55.3	2.47241	1.46444e-06	1.4481e-05	UP
Utp6	2.26	3.64	3.59	25.72	25.17	25.36	2.47117	0.0014734	0.00662269	UP
Mtus1	5.64	5.89	5.23	41.14	44.61	43.24	2.47004	2.85198e-05	0.000213653	UP
Arih1	5.17	3.9	2.95	30.48	31.23	30.08	2.4698	0.000454547	0.00240105	UP
Dyrk2	3.74	3.79	3.9	29.52	30.84	29.77	2.46972	0.000382963	0.00206946	UP
Lrba	6.41	6.34	7.22	48.45	46.83	48.72	2.46903	9.45181e-06	7.85493e-05	UP
Dlg1	7.22	6.62	5.27	48.11	46.3	50.11	2.4676	1.19499e-05	9.73675e-05	UP
Ube2g1	4.02	5.01	4.87	34.21	36.05	35.82	2.46652	0.000142514	0.000876985	UP
Chd2	3	2.72	2.88	22.95	22.52	21.89	2.46463	0.00205169	0.00870768	UP
Dcn	135.97	141.32	127.83	1008.42	1043.62	1008.33	2.46399	2.03589e-77	5.30136e-75	UP
Larp4b	3.69	3.2	4.22	26.85	28.32	27.97	2.46375	0.000721474	0.00357845	UP
Efr3a	3.92	3.54	3.2	28.18	28.67	26.35	2.46226	0.000762057	0.00375146	UP
Sdc2	19.16	18.93	19.35	140.58	144.37	144.78	2.46198	3.63992e-14	1.04828e-12	UP
Foxj3	2.74	3.91	3.55	27.41	28.17	28.05	2.46148	0.00074247	0.00366225	UP
Nrep	100.86	104.5	108.6	781.68	798.17	782.23	2.45805	8.22643e-65	1.77279e-62	UP
Poglut2	5.38	3.35	2.47	25.58	26.18	23.4	2.45549	0.00191419	0.00821924	UP
Prps2	3.55	3.43	3.4	23.92	25.56	25.46	2.4545	0.00133272	0.00609057	UP
Spats2l	6.23	4.85	4.97	39.41	40.83	39.83	2.4542	5.43259e-05	0.000377653	UP
Gnaq	5.74	5.79	5.79	46.82	42.76	44.99	2.45377	1.89209e-05	0.000148178	UP
Twf1	32.06	34.78	33.19	251.48	252.89	246.44	2.4534	9.20212e-23	4.79239e-21	UP
Uri1	3.68	4.72	5.02	35.43	35.3	34.87	2.45307	0.000158956	0.000963063	UP
Gtf2h1	3.11	3.89	3.09	23.67	26.35	24.54	2.45199	0.0013687	0.00623673	UP
Tcf4	8.16	8.28	7.48	57.7	54.81	58.71	2.44893	1.58641e-06	1.56007e-05	UP
Hspa5	155.56	145.36	135.38	1052.98	1139.56	1051.88	2.44284	3.43806e-73	8.42595e-71	UP
Ttc33	2.88	3.22	3.24	20.74	22.54	22.72	2.44261	0.00233427	0.00970271	UP
Sub1	17.88	29.39	26.87	166.09	179.39	205.54	2.44008	4.45991e-14	1.26659e-12	UP
Fkbp14	5.26	4.91	4.13	35.02	36	33.17	2.43977	0.000184147	0.00109342	UP
Crebzf	4.17	5.32	4.88	33.51	34.52	35.24	2.43914	0.000178986	0.00106683	UP
Rbm18	5.28	3.73	3.33	31.34	30.32	28.09	2.43823	0.000589508	0.0030173	UP
Papola	9.24	9.93	7.43	65.65	62.66	64.12	2.43762	5.85581e-07	6.35897e-06	UP
Btbd7	3.54	3.29	3.36	25.24	24.63	24.27	2.43546	0.00149766	0.00672629	UP
Kcnj10	4.68	4.69	5.21	38.39	38.11	35.15	2.43485	0.000108827	0.000695769	UP
Spcs3	5.15	7.26	5.32	40.79	43.82	41.36	2.43479	4.88024e-05	0.000344427	UP
Gt(ROSA)26Sor	5.3	4.05	3.57	32.36	30.75	33.29	2.43173	0.000316361	0.00176574	UP
Arcn1	14.82	13.25	12.8	97.99	101.56	102.5	2.42793	3.13097e-10	5.5826e-09	UP
Scoc	11.52	8.69	9.16	62.86	78.13	80	2.42774	1.70467e-07	2.03802e-06	UP
Cpne3	5.37	5.8	5.72	41.77	42.94	40.05	2.42497	4.53551e-05	0.000321915	UP
Epb41l3	9.64	7.61	8.37	61.12	64.85	64.69	2.42423	5.57805e-07	6.07847e-06	UP
Myl1	4.16	10.81	7.12	51.7	57.3	52.58	2.42233	2.67618e-05	0.000201746	UP
Rabgap1	4.52	4.76	4.8	35.49	38.32	36.62	2.42112	0.000119821	0.000759454	UP
Sertad4	2.72	3.01	3.73	24.11	25.06	23.89	2.41557	0.00168905	0.00738677	UP
Cisd2	7.55	4.6	4.99	41.13	44.11	46	2.41126	4.51218e-05	0.000320442	UP
Rhot1	3.21	3.77	3.84	28.39	26.26	26	2.4088	0.00107757	0.00507674	UP
Mdm2	5.34	5.32	5.81	37.49	39.23	40.4	2.4049	8.72348e-05	0.000572962	UP
Otud4	3.94	3.92	3.69	28	29.93	29.31	2.40473	0.000621123	0.00315139	UP
Mob1a	7.54	6.24	7.04	50.88	51.33	50.47	2.40377	8.1036e-06	6.83447e-05	UP
Rtn1	13.22	10.81	9.88	80.68	83.9	80.96	2.40224	1.9429e-08	2.77534e-07	UP
Gtf2e2	5.09	6.67	4.66	38.92	40.78	42.58	2.39932	6.81034e-05	0.000461318	UP
Metap2	11.65	15.7	12.65	99.32	97.66	99.23	2.39716	1.17293e-09	1.94178e-08	UP
Srpk2	3.77	3.37	2.88	23.92	23.57	24.45	2.39568	0.00189567	0.00816471	UP
Dido1	3.49	3.51	3.36	24.02	23.87	24.09	2.39314	0.00194482	0.00831621	UP
Ptprg	3.35	3.83	3.97	26.23	27.41	26.14	2.39044	0.00119995	0.00557761	UP
Msantd4	4.59	4.39	4.2	31.29	31.52	30.37	2.38649	0.0004547	0.00240105	UP
Zranb1	5.17	3.99	3.55	31.25	29.01	33.19	2.38564	0.000462464	0.00243999	UP
Osbpl9	6.77	6.54	6.4	48.17	49.02	46.08	2.38466	1.59142e-05	0.000126615	UP
Snx7	5.29	4.77	5.14	34.08	34.36	38.93	2.38048	0.000177521	0.00106067	UP
Stim2	7.28	4.64	4.99	39.6	41.2	40.33	2.37933	7.78711e-05	0.000519654	UP
Hnrnph3	7.36	8.91	10.38	59.11	54.64	71.01	2.3759	2.14582e-06	2.04846e-05	UP
Zfp462	3.54	3.69	3.38	25.79	25.93	26.2	2.37206	0.0013448	0.00614127	UP
B930095G15Rik	3.98	4.89	4.49	31.2	31.2	29.9	2.36883	0.000523355	0.00271736	UP
Prkca	5.43	5.08	4.99	36.2	31.57	37.64	2.3672	0.000203335	0.00119039	UP
Pdlim5	7.37	6.06	6.16	45.94	43.77	44.41	2.36562	3.04713e-05	0.000226433	UP
Pdcd10	6.71	8.86	8.63	58.04	65.37	53.29	2.36245	3.28548e-06	2.99965e-05	UP
Ik	15.69	17.62	16.02	114.56	118.79	117.71	2.36159	2.81977e-11	5.8159e-10	UP
Ssbp1	7.51	9.27	5.97	55.46	50.79	55.56	2.36131	7.17271e-06	6.13632e-05	UP
Tnc	10.91	10.2	10.73	75.88	73.66	74.55	2.36114	7.55574e-08	9.66624e-07	UP
Srsf5	85.25	82.64	81.88	574.08	574.74	605.6	2.35795	5.52416e-48	7.84619e-46	UP
Neat1	107.1	117.57	114.29	780.97	769.12	828.86	2.3569	2.16486e-59	4.03859e-57	UP
Tnpo1	4.01	4.34	3.84	27.44	28.61	28.48	2.3541	0.000888395	0.00428232	UP
Zmynd11	10.11	10.81	10.78	75.03	72.23	76.32	2.34723	1.0158e-07	1.26083e-06	UP
Zbtb18	6.32	6.55	5.88	42.88	44.5	44.62	2.34213	3.92336e-05	0.00028264	UP
Hnrnpa1	61.93	63.99	64.42	436.49	437.38	445.92	2.34192	8.38606e-37	8.52173e-35	UP
Cbx5	5.47	5.97	6.39	39.88	38.84	38.9	2.34155	9.92225e-05	0.000642249	UP
Mrpl42	19.87	10.38	13.13	104.9	97.66	93.64	2.3385	2.54233e-08	3.55442e-07	UP
Rad21	11.16	12.8	13.03	83.06	86.39	87.35	2.33662	1.54295e-08	2.23987e-07	UP
Asap1	7	8.09	7.94	53.08	52.91	53.32	2.33572	6.8081e-06	5.83638e-05	UP
Atrn	3.48	3.55	3.58	24.77	26.55	24.21	2.33491	0.00175272	0.00762522	UP
Mllt10	3.4	3.98	3.52	25.71	25.12	24.52	2.33464	0.00171554	0.0074843	UP
Gm49336	3.44	4.14	3.71	25.2	25.16	25.64	2.33423	0.00170966	0.00746647	UP
Nucks1	5.14	6.43	5.75	39.02	38.35	39.77	2.32894	0.000111141	0.000709115	UP
Sms	11.73	10.13	9.67	73.79	71.78	73.72	2.32867	1.5013e-07	1.81127e-06	UP
Polr2b	4.63	4.08	4.67	31.81	32.03	32.49	2.32562	0.000442383	0.00234692	UP
Stx16	10.04	11.26	9.14	70.38	67.45	68.89	2.32554	4.00066e-07	4.47693e-06	UP
Etl4	4.83	4.53	4.37	31.61	31.61	31.55	2.32383	0.00045568	0.00240521	UP
Denr	4.75	3.62	4.13	29.45	28.89	31.35	2.32236	0.000723471	0.00358551	UP
Anp32e	10.25	11.65	11.05	74.26	74.8	77.18	2.32155	1.12343e-07	1.38342e-06	UP
Srrm2	36.79	34.08	34.99	242.86	243.72	238.48	2.3212	4.93098e-21	2.37963e-19	UP
Ptpre	3.87	4.07	3.68	27.9	28.02	26.49	2.31985	0.00113705	0.00530696	UP
Wbp4	4.15	3.58	3.68	27.84	26.59	26.74	2.31954	0.0011221	0.00524891	UP
Emb	3.64	3.96	4	27.44	28.41	26.79	2.31948	0.00112139	0.00524757	UP
Aldh6a1	5.99	5.76	5.83	40.71	40.76	40.67	2.31939	7.30925e-05	0.000491438	UP
Setd7	3.62	3.93	3.51	26.74	26.59	27.92	2.31916	0.00111767	0.0052321	UP
Spty2d1	4.86	3.24	3.24	26.53	24.34	23.61	2.31835	0.00221831	0.00929176	UP
Cxadr	12.66	13.31	13.62	91.29	89.98	92.37	2.31773	4.9377e-09	7.64763e-08	UP
Dpp8	7.42	6.53	7.97	47.77	52.22	49.6	2.31648	1.36113e-05	0.000110044	UP
Mterf3	3.28	4.83	4.02	27.55	23.2	31.35	2.31599	0.0015382	0.00688096	UP
Ostm1	3.63	3.86	3.39	26.11	24.84	23.72	2.31587	0.00194618	0.00831919	UP
H19	76.95	88.07	93.91	594.55	570.53	600.24	2.31585	1.04839e-42	1.25998e-40	UP
Rsrp1	22.05	20.88	19.18	135.9	122.77	164.5	2.31544	9.15067e-12	1.99258e-10	UP
Sorbs2	11.85	13.42	14.39	90.79	87.37	87.22	2.31139	1.05267e-08	1.56078e-07	UP
Clpx	4.62	4.63	3.85	31.74	31	32.33	2.30865	0.000513054	0.00267083	UP
Ncoa1	4.61	4.22	4.17	30.2	29.38	29.21	2.30662	0.000811651	0.00395664	UP
Epb41l2	3.79	4.31	4.3	26.84	28.4	25.58	2.30201	0.00127398	0.00586284	UP
Ebag9	3.76	2.66	4.21	25.27	24.34	24.54	2.29827	0.00211604	0.00892942	UP
Septin2	6.28	7.74	8.12	50.75	47.03	49.6	2.2959	2.06507e-05	0.000159823	UP
Loxl1	4.89	4.48	5.45	29.98	28.89	35.26	2.29417	0.000604749	0.00307922	UP
Snx6	7.95	8.27	7.66	51.26	55.37	55.49	2.29245	7.34697e-06	6.25543e-05	UP
Ndufs1	8.21	7.74	6.79	50.69	51.23	51.78	2.28954	1.19265e-05	9.72407e-05	UP
Calu	42	44.77	41.65	284.22	298.63	279.59	2.28856	1.46983e-23	7.95297e-22	UP
Adss	8.43	9.39	8.79	54.69	58.72	59.52	2.28855	3.50736e-06	3.18362e-05	UP
Azi2	5.66	4.25	4.83	33.69	34.13	32.41	2.28592	0.000430995	0.00229332	UP
Cdk19	22.04	20.55	20.63	142.42	142.92	141.77	2.28505	5.10782e-13	1.30026e-11	UP
Ep300	4.03	4.38	4.07	26.91	26.56	26.14	2.284	0.0014238	0.00643854	UP
Tmem123	8.06	10.27	8.86	59.17	60.91	59.93	2.28273	2.70472e-06	2.5191e-05	UP
Slc33a1	5.84	5.93	5.26	36.76	39.12	37.17	2.27916	0.000177698	0.00106067	UP
Trim24	6.66	5.59	4.58	40.62	37.28	40.75	2.27151	0.00013853	0.000858022	UP
Casp3	6.08	6.15	6.19	39.47	39.1	40.76	2.27137	0.00011629	0.000739696	UP
Cog3	3.69	4.84	3.73	28.07	28.55	29.06	2.27115	0.00105164	0.0049658	UP
Ncoa4	10.55	12.13	10.14	71.65	74.01	72.29	2.26986	2.75874e-07	3.16925e-06	UP
Npnt	16.33	14.35	14.2	98.8	95.94	95.08	2.26789	3.25051e-09	5.14931e-08	UP
Snhg1	6.55	7.23	7.53	50.03	43.76	51.03	2.26722	2.60507e-05	0.000197218	UP
Rcn3	24.84	21.64	20.83	149.3	152.92	146.39	2.26717	3.47645e-13	9.0337e-12	UP
Tmem260	3.82	4.07	3.77	27.37	26.55	25.36	2.2661	0.00162215	0.0071644	UP
Rprd1a	5.38	4.5	4.79	31.04	33.1	28.4	2.26502	0.000756771	0.00372837	UP
Thap12	6.65	7.35	7.13	45.64	47.67	44.44	2.26338	3.76169e-05	0.000272249	UP
Cdc37l1	8.02	7.18	6.24	46.46	45.69	46.47	2.26305	4.08177e-05	0.000293038	UP
C2cd5	4.41	4.9	4.7	30.7	31.02	30.45	2.26255	0.000730708	0.00361422	UP
Selenop	12.82	16.99	14.18	97.77	95.12	96.11	2.26088	6.3244e-09	9.69923e-08	UP
Capza1	11.98	12.94	11.48	78.99	79.02	77.68	2.25887	9.79594e-08	1.21952e-06	UP
Arfip1	9.75	11.59	12.52	72.56	77.93	78.48	2.25614	1.83205e-07	2.17876e-06	UP
Nudt4	11.44	12.35	10.78	72.86	74.53	73.56	2.2532	2.16975e-07	2.54168e-06	UP
Ptges3	19.18	19.75	18.03	124.56	120.43	126.91	2.2524	2.81813e-11	5.8159e-10	UP
Gas5	84.41	95.88	64.98	536.2	514.31	548.6	2.25079	8.64341e-29	5.9035e-27	UP
Yipf4	9.81	10.79	10.38	64.53	69.98	67.18	2.25022	7.97966e-07	8.43805e-06	UP
Asf1a	5.15	2.6	3.6	27.57	24.81	25.47	2.24994	0.00207528	0.00878989	UP
Gsk3b	4.61	3.9	4.98	30.51	29.54	29.74	2.2486	0.000796131	0.00389466	UP
Septin11	12.51	11.91	12.55	80.69	81.69	84.21	2.24749	4.47995e-08	6.02096e-07	UP
Sdcbp	32.2	33.99	30.48	206.95	210.95	206.06	2.24674	1.81319e-17	6.78536e-16	UP
Rab9	9.51	8.87	9.99	61.77	63.36	63.06	2.24394	1.75745e-06	1.70678e-05	UP
Tcerg1	4.92	4.32	3.71	27.82	28.41	28.23	2.23938	0.00128953	0.00592565	UP
Rab6a	17.54	17.52	16.46	109.8	113.06	111.62	2.23399	3.10645e-10	5.55472e-09	UP
Trim44	13.97	13.26	13.3	83.68	88.85	84	2.23086	3.15154e-08	4.32737e-07	UP
Actr3	38.87	37.38	38.25	244.89	243.92	240.34	2.22404	3.21178e-20	1.44924e-18	UP
Brd8	7.31	6.74	8.13	44.15	48.31	47.9	2.21667	4.22131e-05	0.000301843	UP
Ube2w	6.57	6.25	6.85	45.88	42.16	39.21	2.21527	0.000104666	0.000671228	UP
Slc39a8	30.99	32.22	32.2	199.32	202.64	201.9	2.21519	4.90579e-17	1.79291e-15	UP
Tab2	11.11	10.36	10.22	65.24	67.46	65.1	2.21502	1.26341e-06	1.26838e-05	UP
Med7	4.26	9.16	5.98	41.67	39.13	39.51	2.21375	0.000318188	0.00177467	UP
Slc35a1	5	5.36	4.92	31.4	31.71	31.54	2.20963	0.000677604	0.00340683	UP
Klf6	23.94	22.25	21.96	142.96	143.62	142.65	2.20781	1.3801e-12	3.38245e-11	UP
Wwtr1	5.81	6.05	6.84	38.63	41.1	39.88	2.20615	0.000149245	0.000910403	UP
Emp3	3.95	7.41	6.01	35.98	32.37	38.63	2.19774	0.000513034	0.00267083	UP
Fxyd1	9.13	6.78	10.98	65.79	50.77	52.45	2.19582	2.01853e-05	0.000156608	UP
Abi1	10.41	10.75	8.52	63.23	63.44	61.76	2.19371	2.86398e-06	2.64966e-05	UP
Fibin	55.11	49.88	51.54	324.7	328.11	327.78	2.19065	5.41129e-26	3.26742e-24	UP
Rhoq	8.17	7.78	8.1	49.31	50.56	50.29	2.19061	2.45994e-05	0.000187824	UP
Usp8	6.84	5.78	6.84	40.12	42.17	41.5	2.17975	0.000129231	0.000807786	UP
Cdv3	10.38	9.74	9.5	63.43	61.38	61.69	2.17908	3.01484e-06	2.77077e-05	UP
Gcnt1	5.79	4.83	5.07	31.92	33.16	34.33	2.17642	0.000614097	0.00312016	UP
Rnf103	6.05	5.66	3.83	33.28	32.8	32.82	2.17509	0.000719778	0.0035743	UP
Fubp3	6.87	5.4	5.66	36.17	35.97	39.38	2.17228	0.00032102	0.00178887	UP
Btbd1	11.23	10.13	11.3	63.39	67.83	65.85	2.16929	1.74965e-06	1.70186e-05	UP
Eny2	5.74	9.51	8.76	47.72	55.18	50.62	2.1677	4.34438e-05	0.000309934	UP
Eif2s1	3.79	5.21	3.86	27.35	26.25	27.39	2.16683	0.00211108	0.00892033	UP
Etf1	11.59	11	12.2	70.07	74.34	70.84	2.16625	6.12178e-07	6.61904e-06	UP
Mtss1	8.41	9.72	10.02	56.75	55.39	60.25	2.16459	9.36617e-06	7.79383e-05	UP
Ubxn4	7.55	8.59	8.46	49.32	52.77	51.34	2.15953	2.64522e-05	0.000199895	UP
Oxct1	14.1	12.14	12.42	76.13	77.73	77.59	2.15724	2.5807e-07	2.98669e-06	UP
Ppp6r3	7.34	6.69	7.69	44.68	45.77	43.02	2.15416	8.21255e-05	0.000544267	UP
Ddx21	5.34	4.28	5.08	28.5	30.17	26.67	2.15048	0.00162591	0.00717225	UP
Eif4g3	9.12	8.66	10.27	58.22	55.82	55.83	2.14927	9.73284e-06	8.05101e-05	UP
Msrb3	4.75	4.88	4.52	30.38	31.15	30.37	2.14777	0.00107696	0.00507578	UP
Ocrl	14.37	11.4	12.26	75.44	78.03	70.88	2.14615	5.64818e-07	6.14953e-06	UP
Bnip2	9.83	11.98	10.09	61.62	64.81	66.89	2.14517	2.93652e-06	2.71276e-05	UP
Usp14	7.95	6.46	6.05	40.04	41.14	40.1	2.14474	0.000201671	0.00118397	UP
Mtpn	21.56	22.21	22.78	131.13	138.6	132.06	2.13197	2.20427e-11	4.60723e-10	UP
Ids	9.24	8.56	8.38	51.99	52.97	50.6	2.13159	2.51022e-05	0.000190999	UP
Clcn4	7.09	7.93	7.21	43.96	44.89	42.52	2.13113	0.000104468	0.000670991	UP
Aida	3.74	4.77	5.21	24.57	29.13	30.23	2.13027	0.00193314	0.00827762	UP
Msi2	8.18	9.75	8.75	52.55	52.43	56.73	2.1302	1.99949e-05	0.000155324	UP
Fam3c	47.44	43.99	44.29	263.46	264.96	279.89	2.12801	5.16131e-21	2.4812e-19	UP
Fgfr1op2	12.3	10.5	13.05	66.09	74.63	68.07	2.12629	1.62767e-06	1.59688e-05	UP
Huwe1	9.9	8.86	9.37	55.32	55.92	55.7	2.12341	1.32182e-05	0.000106935	UP
Firre	33.41	32.24	36.33	198.2	198.89	201.76	2.11531	5.33016e-16	1.81037e-14	UP
Ramac	16.25	13	12.87	83.04	83.4	82.71	2.11517	1.59358e-07	1.91521e-06	UP
Dync1li2	10.83	9.71	9.77	59.43	61.69	62.45	2.1084	5.81572e-06	5.02182e-05	UP
Atl3	6.69	5.66	5.5	37.44	38.28	37.15	2.10678	0.000364751	0.00199159	UP
Timp1	7	8.81	8.32	47.91	42.88	50.06	2.09967	8.45998e-05	0.000559774	UP
Vezf1	6.91	6.92	7.35	41.1	40.92	40.74	2.09698	0.000192874	0.0011366	UP
Rala	8.14	5.93	6.23	38.57	36.76	40.86	2.09574	0.00031969	0.00178225	UP
Celf1	8.02	8.43	9.42	47.29	48.01	51.46	2.09262	5.41285e-05	0.00037649	UP
Arhgap21	5.61	6	5.66	35.54	34.95	33.63	2.0914	0.000576026	0.00295435	UP
Lgals8	7.06	6.34	5.49	34.04	35.61	35.36	2.09112	0.000640147	0.00322759	UP
Ttc8	7.13	5.27	4.58	36.44	34.15	28.63	2.09105	0.00105547	0.00498201	UP
Seh1l	7.39	7.7	6.64	42.83	41.2	43.87	2.08626	0.000162038	0.000977469	UP
Caprin1	27.81	24.02	23.69	147.13	147.03	147.37	2.08401	6.22448e-12	1.3868e-10	UP
Uba5	7.4	6.75	5.71	38.3	40.1	38.5	2.08253	0.000328341	0.0018264	UP
Tulp4	6.58	5.14	5.63	33.59	35.82	33.94	2.07899	0.0006988	0.00349093	UP
Riok3	6.02	6.02	6	34.94	35.13	34.13	2.07748	0.000639123	0.00322373	UP
Sptssa	39.95	51	44.66	260.81	274.62	248.69	2.07497	1.21595e-17	4.62954e-16	UP
Eif1ax	5.71	4.6	5.18	29.33	31.45	32.14	2.07048	0.0013721	0.00624998	UP
Adgrl2	16.13	12.65	14.11	82.8	81.65	81.83	2.06982	2.42202e-07	2.81608e-06	UP
Smurf2	5.21	5.78	5.47	31.97	29.82	29.65	2.06947	0.00141012	0.00639835	UP
Sfrp1	171.22	171.14	167.69	984.01	955.52	988.46	2.06796	2.09837e-64	4.37126e-62	UP
Dcaf13	5.77	6.37	6.82	34.4	39.23	35.84	2.06746	0.000536523	0.00277796	UP
Cbx1	7.87	8.88	8.57	49.32	48.68	50.59	2.06488	5.31035e-05	0.000370184	UP
Gtf3c6	5.29	10.42	8.94	47.01	47.43	43.18	2.05782	0.000255709	0.00145874	UP
Chst11	6.75	6.92	8.14	41.42	42.19	42.49	2.05343	0.000214967	0.00124971	UP
Cnot1	8.64	8.24	7.91	46.62	47.18	47.76	2.05293	8.18188e-05	0.000542521	UP
Paip2	26.86	34.87	30.1	175.75	175.54	171.03	2.05264	7.70925e-13	1.93879e-11	UP
Sema6a	4.78	4.68	5.04	28.72	29.74	26.02	2.05003	0.00223032	0.00933584	UP
Map3k1	6.62	6.6	7.37	39.15	39.71	40.46	2.04918	0.000300378	0.00168209	UP
Ncor1	9.26	9.15	9.61	53.12	52.28	53.38	2.04347	3.5213e-05	0.000257084	UP
Jak1	11.17	11.3	11.33	62.91	63.45	60.34	2.04185	7.70879e-06	6.53678e-05	UP
Srsf3	28.29	30.46	30.54	163.36	167.59	170.04	2.03939	4.55068e-13	1.16794e-11	UP
Pgrmc1	58.79	65.11	62.35	339.82	361.69	344.38	2.03787	3.71294e-24	2.05346e-22	UP
Trappc6b	10.65	8.21	8.83	48.19	57.6	50.68	2.03553	5.68243e-05	0.000393053	UP
Slc38a2	13.63	13.37	13.91	78.36	76.72	75.41	2.03539	7.23173e-07	7.71899e-06	UP
Fubp1	9.97	8.68	8.83	53.3	51.67	52.39	2.03447	3.93638e-05	0.000283252	UP
Thoc7	9.1	15.79	13.77	76.48	68.41	74.62	2.03354	6.20654e-06	5.33899e-05	UP
Snx25	5.19	5.04	5.6	29.28	30.64	29.2	2.02321	0.00191964	0.00823674	UP
Hnrnpk	70.75	71.02	69.58	386.11	389.6	404.02	2.02311	5.98139e-28	3.89382e-26	UP
BC005537	13.78	13.65	13.45	72.57	77.65	76.56	2.02172	9.40915e-07	9.70338e-06	UP
Clip1	5.52	5.56	5.93	33.07	34.9	32.29	2.02104	0.00101812	0.00483124	UP
Ide	6.18	5.99	5.69	34.27	33.26	32.75	2.02083	0.000997044	0.00473842	UP
Ugdh	13.51	14.36	13.83	83.13	75.11	75.4	2.01906	8.36781e-07	8.77427e-06	UP
Ap3s1	10.58	10.24	11.05	60.79	57.94	57.5	2.01517	1.50036e-05	0.000119827	UP
Slc12a6	5.92	5.79	5.04	30.77	31.64	31.34	2.01347	0.00149923	0.00673061	UP
Snx14	6.61	6.22	6.39	31.65	36.79	36.32	2.01323	0.00083413	0.00405515	UP
Chd8	5.75	4.65	5.2	29.49	29.29	29.77	2.00661	0.00211608	0.00892942	UP
Wnk1	10.55	9.52	9.4	54.93	55.07	54.87	2.00625	3.20372e-05	0.000235965	UP
Camk2d	11.61	12.46	11.98	63.99	68.23	66.45	2.00616	5.03191e-06	4.40555e-05	UP
Gstm4	43.07	39.94	33.88	13	11.8	14.55	-2.00295	3.06675e-05	0.000227485	DN
H2-K1	693.84	674.43	700.89	232.06	237.19	236.73	-2.00432	5.99943e-66	1.3634e-63	DN
Snta1	81.02	79.9	87.4	26.77	27.85	28.71	-2.01508	6.39565e-10	1.08761e-08	DN
Selenbp1	29.03	24.78	23.24	7.89	8.06	10.1	-2.02031	0.000554073	0.00285464	DN
Cdc20	33.76	26.33	29.22	10.47	8.64	10.79	-2.02098	0.000214115	0.00124533	DN
Ptges	40.03	35.22	38.08	11.76	13.07	13.27	-2.02482	2.40577e-05	0.0001838	DN
Mgll	73.11	70.91	75.95	24.27	25.15	24.66	-2.02496	4.47884e-09	7.02397e-08	DN
Tspo	172.05	162.6	185.67	54.51	50.56	69.03	-2.0277	1.33369e-16	4.70899e-15	DN
Agfg2	66.39	59.73	65.64	21.56	20.54	21.2	-2.03732	3.87433e-08	5.24082e-07	DN
Tbx1	31.95	29.32	31.88	10.01	8.42	13.23	-2.03903	0.000171747	0.00103155	DN
Urah	46.78	59.01	52.82	15.61	19.8	17.31	-2.03996	1.37253e-06	1.36369e-05	DN
Bsg	3851.21	3671.81	3902.61	1253.36	1259.61	1229.28	-2.06316	1.15567e-250	1.44448e-247	DN
Sema3b	48.06	45.38	44.89	15.24	15.4	14.75	-2.06973	2.14942e-06	2.04924e-05	DN
Slc8b1	30.17	31.55	29.54	10.63	9.17	9.71	-2.07059	0.000112141	0.000715126	DN
Cblc	41.17	42.24	40.4	10.57	15.85	12.59	-2.07439	1.22981e-05	0.000100009	DN
Gm4735	24.85	23.98	24.78	7.22	7.79	8.65	-2.07837	0.000472045	0.00248529	DN
Gm43305	134.75	121.55	159.63	40.75	48.74	45.16	-2.07879	4.4689e-14	1.26659e-12	DN
Epha2	21.61	21.59	21.1	7.67	6.58	6.3	-2.08266	0.00106109	0.00500661	DN
Uap1l1	23.34	20.61	21.15	7.46	6.72	6.92	-2.08298	0.00095974	0.0045873	DN
Pkp1	30.4	31.12	32.06	9.11	10.97	10.04	-2.0858	9.20514e-05	0.000602698	DN
Cnbd2	19.8	20.63	23.96	4.94	5.91	10	-2.08604	0.00169317	0.00740222	DN
Zbtb42	18.94	19.45	21.35	6.16	5.96	6.72	-2.08832	0.00163176	0.00718273	DN
Pdlim1	32.18	35.8	38.09	11.23	11.18	11.7	-2.09457	3.14971e-05	0.000232537	DN
Itprip	26.45	22.21	24.33	7.35	7.77	8	-2.09887	0.000514713	0.00267835	DN
Ecm1	93.64	90.75	102.02	32.31	30.99	28.34	-2.10929	1.37256e-11	2.94265e-10	DN
Tmem54	50.94	43.13	45.03	11.54	17.8	14.32	-2.11173	3.65888e-06	3.30675e-05	DN
Ctsd	3250.69	3103.18	3202.7	1016.09	1018.8	990.43	-2.11248	1.30207e-232	1.4795e-229	DN
Cox6b2	38.36	43.45	56.02	19.17	13.93	9.94	-2.12195	2.37099e-05	0.000181476	DN
Nudt16	72.47	79.5	77.23	23.87	24.84	22.97	-2.12316	1.11267e-09	1.84691e-08	DN
S100a1	3015.02	2828.96	3053.87	899.33	894.6	986.33	-2.13158	7.51161e-197	7.22212e-194	DN
P2rx2	1329.58	1302.88	1330.27	404.62	416.32	414.65	-2.13418	3.2375e-126	1.49872e-123	DN
Pgd	229.71	225.31	235.96	72.13	71.31	71.12	-2.14411	1.58471e-26	9.75728e-25	DN
Car9	138.1	129.75	135.68	41.14	41.58	41.64	-2.14538	1.97009e-16	6.85911e-15	DN
Nrtn	23.34	15.65	23	6.51	5.41	7.09	-2.15683	0.00137524	0.00625513	DN
H2-Ab1	30.55	35.49	34.68	10.61	10.43	9.87	-2.15778	3.26681e-05	0.000240188	DN
Reep6	38.28	32.1	40.8	11.26	10.9	11.94	-2.15877	1.50874e-05	0.000120343	DN
Sqor	22.05	19.8	20.4	6.47	6.24	7.16	-2.15983	0.000963779	0.00460484	DN
Epdr1	95.07	86.85	88.83	25.73	28.53	28.47	-2.16009	1.48599e-11	3.17609e-10	DN
Gstt3	150.46	148.83	156.01	43.45	46.74	49.3	-2.16436	3.61849e-18	1.43579e-16	DN
Prr5l	26.57	24.01	24.82	8.48	7.43	8.06	-2.17718	0.00025253	0.00144301	DN
Cmbl	25.96	21.85	22.24	7.56	6.77	5.78	-2.18849	0.000481662	0.00253166	DN
Fabp5	110.2	111.24	110.25	31.75	33.92	33.14	-2.19486	4.36985e-14	1.24416e-12	DN
Prdx6	356.48	379.92	357.91	107.53	101.76	110.44	-2.2277	2.61788e-39	2.79666e-37	DN
Hs3st6	33.29	33.64	38.58	9.39	9.77	11.93	-2.22771	1.6614e-05	0.000131596	DN
Por	184.61	175.88	186.48	54.63	51.17	52.87	-2.23537	1.7603e-22	9.09175e-21	DN
Tkt	478.47	444.23	488.73	134.69	133.18	142.23	-2.23585	2.17402e-52	3.52897e-50	DN
Hspb1	646.93	563.36	661.95	181.48	173.08	188.8	-2.23775	3.03878e-59	5.58554e-57	DN
Cbr2	173.27	162.22	171	51.09	45.13	49.19	-2.25592	6.09508e-21	2.89667e-19	DN
Krt18	2065.53	1944.29	2035.49	560.58	593.49	575.56	-2.25785	3.63697e-184	2.84116e-181	DN
Ifitm3	989.28	1086.14	1054.45	302.08	288.43	301.53	-2.26476	1.71171e-88	5.21822e-86	DN
Ly6e	3297.41	2934.83	3093.24	914.27	841.38	878.05	-2.27681	3.66262e-189	3.05194e-186	DN
Fuom	51.3	49.87	44.8	13.25	14.89	13.13	-2.28582	2.77715e-07	3.18455e-06	DN
Eno1	1667.67	1555.2	1618.38	437.9	453.53	457.26	-2.29639	3.56759e-161	2.12339e-158	DN
mt-Nd3	2010.56	2599.15	2601.65	720.7	916.8	353.13	-2.30703	3.10435e-08	4.26856e-07	DN
Lurap1l	32.56	29.9	36.26	7.73	10.11	8.64	-2.32668	1.62587e-05	0.000128863	DN
Pcbd1	24.1	14.23	14.04	4.75	3.65	5.25	-2.34377	0.00230447	0.00961032	DN
Ifitm10	26.51	23.05	28.27	7.75	7.25	6.24	-2.34384	0.000120417	0.000762842	DN
Trf	73.7	69.49	69.25	18.98	20.5	18.38	-2.34777	2.57334e-10	4.66823e-09	DN
Gpr146	30.73	31.13	31.08	8.95	7.7	8.33	-2.34841	2.20251e-05	0.000169515	DN
Ifi27l2a	149.11	167.88	174.4	44.88	39.64	47.46	-2.34944	6.81046e-20	3.04014e-18	DN
Cxcl16	25.44	24.8	24.61	6.07	6.64	7.37	-2.36068	0.000124286	0.000782986	DN
Ctsh	171.38	181.71	172.97	44.76	44.35	49.98	-2.37446	1.42355e-22	7.38297e-21	DN
H2-D1	400.2	372	407.53	101.85	104.37	105.49	-2.3765	1.19509e-48	1.7369e-46	DN
Gm7336	38.12	37.58	37.6	8.67	10.09	11.08	-2.38007	2.38457e-06	2.24433e-05	DN
Hspb8	148.35	136.71	142.46	36.51	38.86	35.8	-2.38339	2.47653e-19	1.05286e-17	DN
Gpx4	1826.26	1803.98	1973.59	503.64	455.26	507.49	-2.38769	3.07624e-148	1.67173e-145	DN
Gpx2	2310.28	2172.74	2249.35	590.86	592.76	568.96	-2.39393	1.00939e-209	1.05137e-206	DN
Fth1	8034.46	7546.51	8205.74	1889.16	2165.06	2105.14	-2.40235	5.4747e-265	7.60314e-262	DN
Cyba	136.64	133.36	141.37	36.15	39.2	31.46	-2.40732	4.35181e-18	1.71588e-16	DN
Ly6c1	25.62	35.38	31.8	6.22	12.76	5.03	-2.40758	0.000173903	0.001042	DN
Tmco4	27.01	29.38	30.11	7.93	6.83	7.04	-2.4201	3.32542e-05	0.000243923	DN
Cryab	1526.45	1526.21	1554.6	384.22	400.05	390.21	-2.42572	1.0911e-163	7.17769e-161	DN
Ckmt1	59.41	56.41	58.29	15.01	14.36	14.73	-2.42828	4.18513e-09	6.57159e-08	DN
Gprc5a	74.05	65.05	70.34	17.55	18.12	17.24	-2.43161	1.38561e-10	2.6004e-09	DN
Rab17	29.2	31.66	25.81	6.96	7.78	6.57	-2.43823	3.24384e-05	0.000238701	DN
Krt7	48.56	43.79	50.32	11.95	10.75	13.17	-2.44268	9.16806e-08	1.15167e-06	DN
Upk3bl	22.26	25.59	24.39	4.53	6.42	7.09	-2.45576	0.000139175	0.000861162	DN
Ephx1	865.45	864.31	863.77	210.88	211.16	212.57	-2.48325	4.11602e-105	1.51312e-102	DN
1190005I06Rik	43.73	39.94	52.31	11.13	8.67	12.66	-2.49579	2.88712e-07	3.29554e-06	DN
Sprr2a3	28.01	24.36	18.52	6.19	4.26	6.85	-2.51706	0.000199118	0.00117064	DN
Ndrg1	140.86	143.53	143.36	34.01	32	35.52	-2.52293	1.21993e-20	5.66837e-19	DN
Tgm2	221.3	210.08	219.68	53.78	48.75	51.91	-2.52331	2.62035e-30	1.94951e-28	DN
Prss22	29.23	23.68	26.94	7.05	7.26	4.57	-2.52465	4.86636e-05	0.000343836	DN
Kcnj13	16.99	18.38	20.19	5.45	4.18	3.63	-2.53355	0.00059905	0.00305364	DN
Elf3	152.65	141.57	146.96	35.58	36.83	31.16	-2.53969	7.86672e-21	3.69647e-19	DN
Atp6v1c2	122.98	110.41	115.75	25.31	28.93	26.56	-2.55989	2.64726e-17	9.7894e-16	DN
Chchd10	124.42	125.23	144.35	30.97	28.1	31.87	-2.56365	1.00795e-18	4.13062e-17	DN
Hmga1	148.29	132.83	160.67	32.38	33.62	35.66	-2.56784	7.76493e-21	3.66241e-19	DN
Cd14	29.81	26.82	26.48	7.07	5.78	5.79	-2.57974	2.29761e-05	0.000176291	DN
mt-Rnr1	1933.58	2145.42	2431.54	499.96	492.56	462.08	-2.61472	6.50631e-106	2.46432e-103	DN
Ly6a	989.5	999.71	917	223.92	215.89	200.44	-2.63683	3.30013e-97	1.14579e-94	DN
Lgals9	26.29	20.71	26.13	5.7	5.23	5.07	-2.64075	5.89855e-05	0.000406203	DN
Spns2	46.88	45.56	49.44	10.51	10.02	10.29	-2.64833	2.03927e-08	2.90306e-07	DN
Adssl1	27.44	24.56	26.46	5.81	6.01	5.02	-2.65011	2.85463e-05	0.000213653	DN
Sytl3	16.27	17.44	18.15	4.22	2.81	3.72	-2.66682	0.000636787	0.00321454	DN
Slco2a1	21.73	20.85	21.93	4.84	4.65	4.44	-2.66718	0.000120686	0.000763772	DN
Cyp2f2	145.04	142.23	139.97	28.89	31.59	30.74	-2.66802	5.78344e-22	2.91481e-20	DN
Cyp2d22	76.89	76.21	78.13	16.11	16.13	16.51	-2.6905	6.04974e-13	1.53379e-11	DN
Ftl1	9730.76	9145.18	9550.53	1931.39	2067.43	1956.77	-2.70784	0	0	DN
Gstt1	192.25	168.44	181.62	41.6	33.56	35.06	-2.73963	2.6592e-26	1.62134e-24	DN
Camp	15.63	12.55	15.22	3.99	2.39	3.17	-2.74089	0.00145608	0.00655367	DN
Rnase1	80.97	80.05	78.58	14.04	18.3	17.47	-2.74595	2.4662e-13	6.57249e-12	DN
Slc25a48	18.59	20.21	19.99	4.39	3.8	4	-2.75137	0.000178325	0.0010634	DN
Cybrd1	23.09	20.59	20.99	4.05	4.79	4.45	-2.77455	8.6054e-05	0.000566995	DN
Aqp5	734.44	690.05	736.55	148.06	147.92	135.67	-2.77503	3.50473e-97	1.18393e-94	DN
Ly6d	27.18	19.12	19.4	3.94	1.86	6.54	-2.77691	0.000342074	0.00188768	DN
Muc1	51.32	50.68	55.75	8.65	11.61	9.69	-2.80252	1.68528e-09	2.73208e-08	DN
Gsta3	58.67	64.26	55.28	11.35	10.67	11.57	-2.84319	1.2028e-10	2.28824e-09	DN
Igfbp6	24.8	27.25	26.95	4.54	5.32	4.55	-2.85072	1.1206e-05	9.20265e-05	DN
Aldh3a1	19.68	17.15	16.35	3.3	4.32	3.05	-2.85839	0.000323374	0.00180038	DN
Kcnh2	26.16	23.54	29.6	4.85	4.56	4.85	-2.86701	1.03628e-05	8.54386e-05	DN
C1qtnf1	35.6	34.69	31.36	7.29	5.39	6.8	-2.87875	8.47879e-07	8.8535e-06	DN
Akr1b1	439.99	445.3	424.73	81.28	80.7	79.39	-2.89608	1.72486e-65	3.84982e-63	DN
B3gnt7	20.01	18.46	22.36	3.79	2.89	4.08	-2.89977	0.000115525	0.000735207	DN
Tesc	13.14	20.48	16.1	3.44	2.78	3.45	-2.90164	0.000553347	0.00285207	DN
Krt4	20.8	21.4	23.55	3.35	3.93	4.72	-2.91367	5.768e-05	0.000398091	DN
Cda	127.58	130.02	139.76	28.59	21.9	21.2	-2.91898	9.25691e-21	4.33341e-19	DN
Srxn1	76.89	74.29	73.88	12.96	14.11	12.89	-2.94497	9.55467e-14	2.61894e-12	DN
Hmox1	208.81	208.83	215.47	36.63	36.89	36.79	-2.96494	2.30231e-35	2.18005e-33	DN
Lbp	40.57	41.1	44.37	7.04	7.69	7.46	-2.97077	1.89758e-08	2.71994e-07	DN
Mybpc2	77.85	78.87	78.1	13.15	14.49	13.65	-2.97269	2.09877e-14	6.20153e-13	DN
Loxl4	18	17.19	17.54	2.96	2.99	3.24	-3.01086	0.000189555	0.00112021	DN
Gmpr	39.92	37.88	40.35	7.61	6.14	6.43	-3.01298	5.18343e-08	6.84669e-07	DN
Lgals3	167.47	160.16	181.4	30.19	25.78	30.17	-3.01522	2.11701e-28	1.4226e-26	DN
Msln	149	157.53	160.26	25.7	27.65	23.74	-3.03518	2.03347e-26	1.2459e-24	DN
Mocos	18.7	16.6	18.08	3.05	3.38	3.43	-3.03755	0.000157084	0.000954493	DN
Slc5a11	12.73	11.85	10.86	1.66	1.67	1.96	-3.03834	0.00186316	0.008033	DN
Klhdc7a	29.81	30.08	31.53	5.35	4.92	5.09	-3.0698	8.88435e-07	9.2154e-06	DN
Gstt2	12.72	11.85	12.45	1.85	2.8	1.16	-3.07515	0.00202016	0.0086036	DN
Wnt5b	14.93	13.7	15.58	2.16	2.79	2.48	-3.13643	0.000483358	0.00253844	DN
Ptgds	1111.03	1038.48	1086.31	156.32	173.38	166.92	-3.15831	1.67818e-162	1.04878e-159	DN
Gstm1	879.1	822.22	888.22	135.23	129.36	126.62	-3.1797	4.02151e-135	2.09437e-132	DN
Chi3l1	116.47	109.4	112.96	15.31	16.46	17.72	-3.23964	2.39083e-21	1.1673e-19	DN
Chst5	122.39	112.8	117.94	16.35	17.54	16.9	-3.24397	2.70186e-22	1.37278e-20	DN
Tnfsf13	16.94	17.37	15.85	2.63	2.4	2.17	-3.28938	0.000177618	0.00106067	DN
Cbr3	48.29	52.56	60.47	8.33	6.28	7.93	-3.32514	6.11659e-11	1.22715e-09	DN
Gm29216	35562.9	35750.9	36411.9	3996.43	4094.83	6398.42	-3.35126	6.9127e-103	2.46862e-100	DN
Slpi	4242.54	4177.95	4233.24	567.18	542.24	573.69	-3.3639	0	0	DN
Tmem176b	5224.85	4619.24	4899.92	668.85	656.89	628.61	-3.36701	0	0	DN
Stbd1	61.26	50.48	50.47	5.97	8.2	6.65	-3.39105	3.6993e-11	7.56751e-10	DN
Ltf	29.03	28.9	27.04	3.53	3.05	3.65	-3.40405	8.59249e-07	8.9498e-06	DN
Rn18s-rs5	8872.42	8092.95	11299	1091.83	1335.9	1182.77	-3.41949	1.24823e-150	7.09163e-148	DN
Folr1	17.87	18.22	19.32	3.11	1.63	1.8	-3.42638	6.5795e-05	0.000447915	DN
Gstm2	1045.27	992.71	1012.53	131.41	130.04	126.36	-3.43182	5.32134e-171	3.69508e-168	DN
Kcnq1	64.75	66.45	67.63	8.31	8.09	8.53	-3.44652	5.34534e-14	1.49133e-12	DN
Plekhs1	16.73	14.69	15.55	2.07	2.11	2.3	-3.45248	0.000161915	0.000977197	DN
Prss36	69.33	66.33	69.27	8.6	8.15	8.36	-3.48134	2.09811e-14	6.20153e-13	DN
Tinagl1	83.08	73.81	92.02	9.6	9.49	10.99	-3.50535	9.53964e-17	3.4165e-15	DN
Igsf5	14.72	18.12	16.66	1.6	2.45	2.02	-3.51359	0.000113518	0.00072354	DN
Scnn1a	18.63	19.47	20.99	2.19	2	2.82	-3.52949	2.98752e-05	0.000222666	DN
Cldn4	1033.71	942.27	1015.8	113.01	111.9	118.95	-3.57339	4.9581e-171	3.64537e-168	DN
Cd68	17.66	13.16	13.46	2.49	1.13	1.94	-3.58975	0.000321847	0.00179268	DN
Mt1	3592.83	3465.59	3626.42	404.78	386.85	393.86	-3.62439	0	0	DN
Mab21l4	24.86	18.67	20.51	2.69	2.36	2.04	-3.66576	1.09453e-05	8.9944e-05	DN
Tmem176a	4095.23	3673.96	3893.99	419.73	408.47	402.59	-3.69643	0	0	DN
Crb2	11.16	9.97	9.78	1.1	1.25	1.11	-3.82217	0.00157091	0.00699791	DN
Mt2	4211.29	4151.1	3985.1	327.23	353.11	294.84	-4.11562	0	0	DN
Gdf15	53.3	50.51	56.84	3.69	2.64	4.84	-4.19949	1.29567e-12	3.19421e-11	DN
C2	33.55	33.49	32.4	2.34	2.38	3.18	-4.27642	1.79724e-08	2.585e-07	DN
Nqo1	133.29	120.05	123.34	7.72	9.79	8.31	-4.30673	2.78361e-27	1.76611e-25	DN
Lcn2	3951.57	3657.9	3909.29	259.47	242.47	258.2	-4.37653	0	0	DN
Rpph1	27.02	41.92	51.66	3.04	0	4.89	-4.37716	1.997e-07	2.35254e-06	DN
Dhrs3	326.67	289.38	311.55	18.56	17.7	22.11	-4.42816	1.86884e-63	3.82928e-61	DN
Osgin1	129.36	123	134.74	8.21	7.75	6.26	-4.58896	2.77961e-28	1.848e-26	DN
Sftpd	74.38	77.62	77.36	4.53	4.07	4.41	-4.5923	1.30836e-17	4.94056e-16	DN
Gpx3	689.25	724.64	815.91	40	38.68	42.91	-4.64545	1.97626e-130	9.88049e-128	DN
Cited1	97.47	96.16	101.03	4.29	5.46	6.87	-4.65385	8.42414e-22	4.19495e-20	DN
Hp	32.12	27.04	34.49	1.5	1.26	1.57	-4.66914	5.13426e-08	6.80521e-07	DN
Rn7s2	616.6	656.37	497.58	15.83	41.28	17.37	-5.03477	2.04281e-51	3.27347e-49	DN
Rn7s1	616.6	656.37	995.16	15.83	41.28	17.37	-5.38749	1.15933e-52	1.93206e-50	DN
Scrg1	7.65	9.81	7.27	0.22	0	0.2	-5.95825	0.000691904	0.00346756	DN
Lypd2	17.81	20.53	11.07	0.99	0	0.39	-5.9973	4.66101e-05	0.00033026	DN
Tff1	11.44	6.88	9.15	0.22	0.24	0.2	-6.06235	0.000436055	0.00231531	DN
Cyp1a1	10.79	8.4	9.95	0.13	0	0.17	-6.1663	0.000252605	0.00144301	DN
Gm44709	15.24	7.8	14.28	0	0	0	-6.51482	5.32493e-05	0.000370994	DN
Cldn22	13.2	16.61	13.96	0	0	0	-6.77322	9.48024e-06	7.87333e-05	DN

## Sheet: Supple #5
Supplemenraty Table S5. Exprssion fold changes of 12 key biological pathways related gene with morphogenesis
Gene_id	MACs vs MI | log2FoldChange	G0 vs MI | log2FoldChange	G3 vs MI | log2FoldChange	Beta-catenin independent WNT signaling	Hedgehog ligand biogenesis	Hedgehog off state	Hedgehog on state	Mouse HOX genes	Signaling by Activin	Signaling by BMP	Signaling by Hedgehog	Signaling by Retinoic acid	Signaling by TGF-B family members	Signaling by TGF-B Receptor Complex	Shh related genes	Total
Smurf2	0.293468	-1.72189	0.198185	1			1			1	1		1	1	1	7
Smurf1	0.555143	1.01998	0.554539	1			1			1	1		1	1	1	7
Rps27a	0.58936	0.167597	-0.182292	1	1	1	1				1		1	1		7
Ubc	1.52421	2.21627	0.950485	1	1	1	1				1		1	1		7
Ubb	0.601213	0.757715	-0.0774254	1	1	1	1				1		1	1		7
Uba52	-0.68766	-0.0309459	-1.26115	1	1	1	1				1		1	1		7
Psmb7	0.108081	0.521084	-0.299117	1	1	1	1				1					5
Psma4	0.188431	-0.266235	0.550891	1	1	1	1				1					5
Psma7	0.100255	1.435	0.460701	1	1	1	1				1					5
Psmb3	-0.174716	1.19871	-0.169227	1	1	1	1				1					5
Psmb1	-0.188064	0.634235	-0.326812	1	1	1	1				1					5
Psmb9	0.968448	1.1382	-0.358295	1	1	1	1				1					5
Psma8	2.37915	0	0	1	1	1	1				1					5
Psma5	-0.217126	0.700574	-0.0075437	1	1	1	1				1					5
Psmb4	0.427312	1.26015	0.0983928	1	1	1	1				1					5
Psmb10	3.11236	3.56605	1.71555	1	1	1	1				1					5
Psmb5	-0.284381	1.35448	-0.0251044	1	1	1	1				1					5
Psma3	0.226255	-0.810613	0.249153	1	1	1	1				1					5
Psmb6	0.10642	1.31103	-0.0337566	1	1	1	1				1					5
Psmb8	2.46573	1.92055	-0.327716	1	1	1	1				1					5
Psma2	-0.171379	0.209352	0.168744	1	1	1	1				1					5
Psma1	-0.423747	-0.638601	0.32184	1	1	1	1				1					5
Psmb2	-0.581263	0.807587	-0.240628	1	1	1	1				1					5
Psma6	0.232248	0.300835	0.277308	1	1	1	1				1					5
Dhh	-2.16691	-4.93426	-5.5411		1		1				1				1	4
Ihh	5.87087	0	0		1		1				1				1	4
Gli2	2.47897	-3.07314	-0.231188			1	1				1				1	4
Gli3	1.27349	-3.88088	-0.125113			1	1				1				1	4
Ptch1	2.15485	-0.267944	0.82787			1	1				1				1	4
Sufu	-0.0177116	0.701418	0.076705			1	1				1				1	4
Smo	1.38951	1.23808	0.620455			1	1				1				1	4
Csnk1a1	0.319472	-0.963675	0.403658			1	1				1				1	4
Kif3a	-0.689199	-3.34558	-0.656546			1	1				1				1	4
Smad4	0.515391	-0.599817	-0.0919699						1	1			1	1		4
Arrb2	0.917663	-0.741041	-1.86734	1			1				1					3
Pard6a	-0.369141	0.842921	-0.00503973	1									1	1		3
Rhoa	0.507224	1.18248	0.395386	1									1	1		3
Disp2	-3.46318	-2.79406	-2.4369		1						1				1	3
Gpc5	-0.0556834	-2.58898	-0.751857		1						1				1	3
Itch	0.582088	-1.70219	0.834175			1	1				1					3
Numb	-0.483808	-0.994049	0.0506062			1	1				1					3
Rbx1	-0.298543	0.430776	-0.248989			1	1				1					3
Evc2	0.328299	0.576581	0.251639				1				1				1	3
Evc	0.678472	0.718244	0.329232				1				1				1	3
Boc	0.49418	0.0081478	0.821064				1				1				1	3
Smad2	0.429421	-1.83919	-0.15581						1				1	1		3
Smad3	0.841068	1.19378	0.0907604						1				1	1		3
Mapk3	-0.485636	1.74963	0.212173						1				1	1		3
Mapk1	-0.180559	-0.51641	0.0116347						1				1	1		3
Acvr2b	0.89985	-0.166705	0.648674						1	1			1			3
Acvr2a	0.406199	-3.56649	0.319261						1	1			1			3
Inhba	-4.06461	-5.88206	-1.09803						1	1			1			3
Smad7	1.37069	0.262527	0.0630417							1			1	1		3
Wnt5a	-0.713922	0.290342	1.17986	1											1	2
Fzd4	-0.231698	-3.00342	-1.8401	1											1	2
Wnt4	3.8433	5.13822	3.59304	1											1	2
Lef1	1.19392	-4.93789	-2.64185	1											1	2
Vcp	0.172232	0.313569	0.403969		1						1					2
Sel1l	0.351806	-0.39959	0.487357		1						1					2
Tuba1a	-0.642083	-0.680347	-0.649319			1					1					2
Tuba4a	-1.31336	1.74927	0.0543596			1					1					2
Tuba1b	0.0332819	1.49062	0.10709			1					1					2
Tuba1c	0.0920083	1.41668	-0.18404			1					1					2
Tubb6	2.37065	0.516595	0.680301			1					1					2
Tubb2b	-2.47468	-2.91811	-3.55415			1					1					2
Tubb2a	-0.298234	0.261029	-0.0967818			1					1					2
Tubb4b	-0.628375	1.96023	0.656889			1					1					2
Tubb4a	-0.474923	-3.32431	-3.66087			1					1					2
Tubb3	-3.00286	-1.55495	-2.63511			1					1					2
Adcy3	0.860952	1.53334	-0.345493			1					1					2
Prkacb	0.649962	-1.26421	0.464349			1					1					2
Prkaca	-0.827183	0.51817	-0.403369			1					1					2
Prkar2a	0.10393	-1.69722	-0.218489			1					1					2
Cul1	0.669566	-2.45158	0.739814			1					1					2
Skp1	-3.3654	-1.1235	0.508808			1					1					2
Gsk3b	0.0708597	-2.54965	-0.450055			1					1					2
Ift57	-0.867844	-2.67213	0.0209397			1					1					2
Ift52	-0.840465	-0.0322227	0.134148			1					1					2
Ift172	0.785314	0.849183	1.37412			1					1					2
Ift88	-0.259422	-2.66185	0.221519			1					1					2
Grk2	1.16066	1.22927	0.325063				1				1					2
Arrb1	-0.101158	2.25797	0.501924				1				1					2
Inhbb	-1.26639	0.113575	-2.20752						1				1			2
Acvr1b	-0.873646	-0.25216	-0.113891						1				1			2
Bmp2	2.3069	-2.99786	-1.11827							1			1			2
Smad1	1.13591	0.912972	0.541246							1			1			2
Nog	1.99067	0.610259	-1.21737							1			1			2
Amh	1.41565	0.598827	-0.00335711							1			1			2
Wwtr1	1.41556	-1.7501	0.305758										1	1		2
Furin	0.809183	1.26465	-0.0839846										1	1		2
Cdk8	0.0791631	-2.92055	-0.137216										1	1		2
Ccnc	-0.624598	-2.98922	-0.0104558										1	1		2
E2f5	-0.0857667	-0.299731	0.559117										1	1		2
E2f4	-0.213132	-0.229993	-0.733203										1	1		2
Tfdp2	1.03751	-2.85658	-0.583573										1	1		2
Tfdp1	0.205629	-0.689746	-0.247459										1	1		2
Rbl1	-0.205505	-2.85549	-0.872014										1	1		2
Rnf111	0.186908	-1.82352	0.160118										1	1		2
Snw1	0.210015	-0.0547509	0.359104										1	1		2
Ncor2	0.325609	-0.862181	-0.632443										1	1		2
Ncor1	0.249469	-1.64555	0.249009										1	1		2
Hdac1	-1.13477	-0.624897	-0.511086										1	1		2
Trim33	-0.134909	-3.92332	0.213918										1	1		2
Tgfb1	0.661669	-0.812873	-1.34635										1	1		2
Strap	0.60023	-1.36083	0.276377										1	1		2
Cbl	0.613418	-0.964229	0.466398										1	1		2
Itgav	-0.148	-2.59079	0.368793										1	1		2
Itgb1	0.402438	-2.32142	0.301026										1	1		2
Itga8	1.45082	-2.4654	1.32199										1	1		2
Itgb5	1.97431	1.42622	0.74324										1	1		2

## Sheet: Supple #6
Supplemenraty Table S6. Statistics summary for scRNA-seq analysis
Sequencing results	Values
Number of Reads	314485946
Number of Short Reads Skipped	0
Valid Barcodes	0.969
Valid UMIs	1
Sequencing Saturation	0.313
Q30 Bases in Barcode	0.972
Q30 Bases in RNA Read	0.952
Q30 Bases in UMI	0.97
Mapping results
Reads Mapped to Genome	0.967
Reads Mapped Confidently to Genome	0.94
Reads Mapped Confidently to Intergenic Regions	0.025
Reads Mapped Confidently to Intronic Regions	0.137
Reads Mapped Confidently to Exonic Regions	0.778
Reads Mapped Confidently to Transcriptome	0.743
Reads Mapped Antisense to Gene	0.022
Statisitics summary for UMI per cells
Estimated Number of Cells	10997
Fraction Reads in Cells	0.78
Mean Reads per Cell	28597
Median UMI Counts per Cell	7009
Median Genes per Cell	2156
Total Genes Detected	22833

## Sheet: Supple #7
Supplemenraty Table 7. Differentially expressed genes in cells belonging in Cluster 11
FeatureID	FeatureName	cluster 11			cluster1			cluster2			cluster3			cluster4			cluster5			cluster6			cluster7			cluster8			cluster9			cluster10			Cluster 12			Cluster 13			Cluster 14			Cluster 15			Cluster 16
		Cluster 11 Log2 Fold Change	Cluster 11 P-Value	Status	Cluster 1 Log2 Fold Change	Cluster 1 P-Value	Status	Cluster 2 Log2 Fold Change	Cluster 2 P-Value	Status	Cluster 3 Log2 Fold Change	Cluster 3 P-Value	Status	Cluster 4 Log2 Fold Change	Cluster 4 P-Value	Status	Cluster 5 Log2 Fold Change	Cluster 5 P-Value	Status	Cluster 6 Log2 Fold Change	Cluster 6 P-Value	Status	Cluster 7 Log2 Fold Change	Cluster 7 P-Value	Status	Cluster 8 Log2 Fold Change	Cluster 8 P-Value	Status	Cluster 9 Log2 Fold Change	Cluster 9 P-Value	Status	Cluster 10 Log2 Fold Change	Cluster 10 P-Value	Status	Cluster 12 Log2 Fold Change	Cluster 12 P-Value	Status	Cluster 13 Log2 Fold Change	Cluster 13 P-Value	Status	Cluster 14 Log2 Fold Change	Cluster 14 P-Value	Status	Cluster 15 Log2 Fold Change	Cluster 15 P-Value	Status	Cluster 16 Log2 Fold Change	Cluster 16 P-Value	Status
ENSMUSG00000029275	Gfi1	7.93405	1.79885e-281	UP	1.21407	1	-	-1.65358	0.336747	-	-4.85319	6.46446e-49	DN	-1.82126	0.343687	-	-5.11132	7.44367e-28	DN	-3.82062	1.01746e-15	DN	-4.82479	5.40254e-23	DN	-6.02553	8.22156e-44	DN	-1.84305	2.68831e-05	-	-4.77276	2.1191e-21	DN	-3.12704	0.00942619	DN	0.231976	1	-	-1.21632	1	-	-4.19936	0.0100271	-	0.368889	1	-
ENSMUSG00000028441	1110017D15Rik	7.89469	8.5413e-299	UP	0.907004	1	-	-1.24912	0.517461	-	-4.93724	7.37224e-62	DN	-1.96395	0.277416	-	-4.24867	4.98369e-30	DN	-3.63957	4.06385e-18	DN	-4.2637	6.24485e-26	DN	-4.58983	5.12809e-46	DN	-3.266	1.45955e-12	DN	-3.58549	2.15531e-20	DN	-2.94678	0.00534154	DN	0.582984	1	-	-0.619691	1	-	-2.69549	0.0531358	-	-0.45234	1	-
ENSMUSG00000024497	Pou4f3	7.82187	8.5608e-299	UP	1.42263	0.692804	-	-2.27772	0.113678	-	-4.59766	1.18142e-56	DN	-2.44499	0.181364	-	-4.04854	5.3997e-28	DN	-4.2749	1.62153e-20	DN	-5.44851	3.02275e-30	DN	-4.73352	8.20051e-46	DN	-2.05351	6.70334e-07	DN	-3.62174	4.2838e-20	DN	-4.33567	0.000233984	DN	-2.39363	1	-	-1.83922	1	-	-3.23495	0.0196533	-	0.332128	1	-
ENSMUSG00000049154	Fam183b	7.81401	1.11362e-275	UP	1.30446	1	-	-0.95649	0.742399	-	-5.62575	8.60225e-56	DN	-1.15155	0.648556	-	-4.61257	8.99293e-27	DN	-5.00764	7.33933e-20	DN	-2.39607	1.49312e-11	DN	-4.28948	4.97784e-36	DN	-3.3059	8.01856e-11	DN	-4.27401	3.58319e-20	DN	-2.89313	0.0132579	-	-0.952401	1	-	-1.39848	1	-	-2.37813	0.137121	-	0.186865	1	-
ENSMUSG00000022055	Nefl	7.80482	4.38722e-239	UP	1.08652	1	-	-1.83252	0.322159	-	-4.70789	2.83966e-40	DN	-1.73599	0.412227	-	-5.02605	3.1639e-23	DN	-3.82887	1.88265e-13	DN	-3.92746	1.38324e-16	DN	-4.8051	3.15962e-32	DN	-2.1192	1.66692e-05	DN	-2.86441	3.02113e-11	DN	-3.30557	0.0139597	-	-1.36433	1	-	-2.39641	0.874446	-	-3.79213	0.0334624	-	0.776499	1	-
ENSMUSG00000033342	Plppr5	7.71746	3.52931e-270	UP	-0.506295	1	-	-3.10516	0.0473433	-	-4.4889	3.71286e-45	DN	-3.00863	0.139997	-	-4.11968	2.48903e-23	DN	-5.10334	4.87778e-19	DN	-4.68634	4.86123e-22	DN	-6.30354	1.31061e-43	DN	-1.97062	1.0602e-05	-	-3.24538	6.4355e-15	DN	-3.57509	0.00390009	DN	-0.632286	1	-	-1.07811	1	-	-2.47384	0.115955	-	-0.494313	1	-
ENSMUSG00000052730	Gm5111	7.70948	2.6999e-240	UP	0.858159	1	-	-1.03219	0.686358	-	-4.49465	5.0279e-38	DN	-1.2005	0.605328	-	-5.81792	2.05547e-24	DN	-4.62205	2.97613e-15	DN	-4.52776	4.28861e-18	DN	-4.2264	1.13716e-28	DN	-1.55629	0.000887513	-	-2.87622	3.65328e-11	DN	-3.09431	0.0197237	-	-1.15331	1	-	-1.18359	1	-	-1.99255	0.267238	-	0.987757	1	-
ENSMUSG00000024857	Cabp2	7.70217	0	UP	1.70208	0.115915	-	-2.00433	0.141997	-	-4.61493	1.00855e-70	DN	-2.23084	0.192542	-	-4.1923	1.01742e-35	DN	-3.8481	1.01392e-22	DN	-4.81785	4.32222e-35	DN	-4.93652	1.21805e-59	DN	-2.2481	5.91708e-09	DN	-4.37165	3.84073e-30	DN	-3.57675	0.000301295	DN	-0.633949	1	-	-1.66603	1	-	-4.28563	0.00095203	DN	-0.303144	1	-
ENSMUSG00000022262	Dnah5	7.68053	1.59018e-228	UP	0.0198783	1	-	-3.58596	0.0529022	-	-4.31457	2.28615e-35	DN	-1.90075	0.376297	-	-5.19081	3.05025e-22	DN	-5.16854	1.3158e-15	DN	-4.90428	1.81616e-18	DN	-4.55207	4.6517e-29	DN	-2.07396	3.44603e-05	DN	-3.25609	2.84513e-12	DN	-3.05403	0.0231702	-	-1.11308	1	-	-1.14331	1	-	-3.54089	0.0462017	-	0.0261823	1	-
ENSMUSG00000039391	Ccdc81	7.67099	1.37424e-253	UP	0.804847	1	-	-2.99914	0.0640361	-	-5.19747	2.67089e-47	DN	-2.90261	0.168057	-	-4.01297	1.77904e-21	DN	-3.99304	3.5761e-15	DN	-5.31978	1.31627e-22	DN	-4.18482	9.27647e-32	DN	-2.38584	6.68859e-07	DN	-4.03977	2.46662e-17	DN	-2.88271	0.0185706	-	-0.526266	1	-	-2.55974	0.837563	-	-2.95407	0.0654542	-	-0.388392	1	-
ENSMUSG00000073774	Kncn	7.63484	3.55289e-226	UP	0.381644	1	-	-0.339889	1	-	-3.83512	1.27162e-30	DN	-2.25649	0.294	-	-3.95284	1.64534e-17	DN	-3.60898	1.10585e-11	DN	-3.24688	1.06247e-12	DN	-4.54395	1.27499e-27	DN	-3.2354	4.00755e-08	DN	-3.02272	6.29666e-11	DN	-2.2358	0.0834077	-	0.119855	1	-	-1.9144	1	-	-2.30795	0.211319	-	0.256944	1	-
ENSMUSG00000062252	Lhfpl5	7.619	2.95427e-268	UP	1.34292	1	-	-2.55977	0.0981685	-	-4.7551	2.65832e-51	DN	-3.46512	0.0924449	-	-3.83598	1.40175e-23	DN	-3.32737	1.82749e-14	DN	-4.8799	8.39118e-25	DN	-5.5342	5.66573e-45	DN	-3.06166	3.17142e-10	DN	-4.41094	1.87184e-21	DN	-3.02969	0.00913723	DN	-1.08877	1	-	-2.12086	1	-	-2.93068	0.0553767	-	0.636398	1	-
ENSMUSG00000042861	Kcna10	7.61404	0	UP	1.1837	1	-	-1.9012	0.159477	-	-4.33278	1.27049e-68	DN	-2.9779	0.0691717	-	-3.34378	1.84198e-28	DN	-4.13034	3.10803e-25	DN	-5.39514	5.33019e-40	DN	-4.45547	3.88374e-56	DN	-2.65697	1.39798e-11	DN	-3.75019	2.36922e-26	DN	-3.3741	0.000430881	DN	-1.01725	1	-	-2.04933	0.973881	-	-4.44605	0.000511706	DN	-0.141351	1	-
ENSMUSG00000027022	Xirp2	7.60717	0	UP	-1.52037	1	-	-2.65166	0.0504324	-	-4.59709	3.91614e-66	DN	-2.55513	0.14552	-	-4.9352	7.21059e-39	DN	-5.06573	1.57856e-27	DN	-4.856	5.17603e-33	DN	-3.99444	1.80902e-45	DN	-3.04628	8.8167e-13	DN	-3.69038	1.39027e-23	DN	-2.41893	0.0148602	-	-3.18188	1	-	-4.21397	0.314341	-	-3.28599	0.0115342	-	-2.04262	1	-
ENSMUSG00000003657	Calb2	7.58542	6.9247e-272	UP	2.01651	0.0238094	-	-2.12043	0.181036	-	-5.03969	1.15829e-57	DN	-2.02389	0.301653	-	-3.78984	1.15513e-24	DN	-5.19175	1.68214e-22	DN	-4.66338	1.27563e-25	DN	-5.71168	1.45557e-49	DN	-1.34895	0.00134292	-	-4.32038	1.84814e-22	DN	-5.40209	7.91971e-05	DN	-1.45856	1	-	-1.90494	1	-	-4.88709	0.00249506	DN	-1.32002	1	-
ENSMUSG00000027581	Stmn3	7.57662	2.21872e-249	UP	1.14708	1	-	-3.77838	0.0284039	-	-4.15647	1.64004e-38	DN	-2.09363	0.291173	-	-4.15478	2.55764e-21	DN	-4.03438	8.15708e-15	DN	-4.68049	6.52611e-20	DN	-3.96008	3.61422e-29	DN	-2.16063	5.06531e-06	DN	-3.15758	2.78732e-13	DN	-3.24668	0.00979123	DN	0.282714	1	-	-1.33596	1	-	-2.14509	0.21339	-	-0.166231	1	-
ENSMUSG00000022054	Nefm	7.48921	1.97326e-274	UP	1.15376	1	-	0.193694	1	-	-4.09456	8.24921e-50	DN	-2.61915	0.17104	-	-4.90582	2.08513e-32	DN	-4.44941	7.42232e-21	DN	-4.13114	5.40721e-24	DN	-5.00878	3.81624e-47	DN	-2.53373	9.3015e-09	DN	-3.01823	6.91736e-16	DN	-5.51025	4.27415e-05	DN	-2.56745	1	-	-2.59885	0.854837	-	-2.99323	0.039478	-	0.158133	1	-
ENSMUSG00000010136	Pifo	7.42911	7.67915e-233	UP	1.50468	0.789903	-	-1.8832	0.293843	-	-4.26738	4.36448e-39	DN	-1.46323	0.491175	-	-3.89924	4.05187e-20	DN	-3.87965	2.97011e-14	DN	-4.20221	2.09133e-18	DN	-4.33682	2.83735e-31	DN	-1.30404	0.0043373	-	-3.02408	1.74185e-12	DN	-2.35313	0.0616364	-	-0.41334	1	-	-0.118969	1	-	-3.84265	0.0242163	-	-0.275578	1	-
ENSMUSG00000078161	Erich3	7.41771	2.14448e-247	UP	0.560447	1	-	-0.978104	0.717172	-	-4.36895	1.7919e-42	DN	-1.56387	0.415015	-	-3.84687	3.12827e-21	DN	-4.24484	3.1771e-16	DN	-3.42142	2.46047e-16	DN	-4.59139	6.98236e-35	DN	-2.48144	2.21498e-07	DN	-3.36939	5.4223e-15	DN	-4.45789	0.00105356	DN	0.0726895	1	-	-2.54716	0.733343	-	-0.933033	0.829028	-	0.625588	1	-
ENSMUSG00000074240	Cib3	7.40196	0	UP	1.3186	0.786641	-	-1.91462	0.16742	-	-3.82769	1.24598e-60	DN	-2.25572	0.187133	-	-3.2063	2.91101e-27	DN	-3.46185	4.45383e-21	DN	-4.7008	1.29733e-36	DN	-4.48716	6.6589e-58	DN	-2.3308	1.18216e-09	DN	-4.11987	5.80069e-30	DN	-2.9099	0.00217202	DN	-1.97017	1	-	-2.00123	1	-	-3.22677	0.00850413	DN	-0.508719	1	-
ENSMUSG00000041476	Smpx	7.37706	0	UP	1.92114	0.0143575	-	-2.34111	0.0616394	-	-4.51443	4.34702e-77	DN	-1.28106	0.472936	-	-3.91414	9.44839e-37	DN	-4.2348	7.5551e-28	DN	-3.19484	1.32519e-24	DN	-4.33069	1.21959e-58	DN	-2.26201	9.92827e-10	DN	-4.07546	3.43892e-31	DN	-3.28174	0.000355259	DN	-0.71818	1	-	-1.37102	1	-	-3.66129	0.00188218	DN	-0.316854	1	-
ENSMUSG00000062372	Otof	7.37589	9.79011e-308	UP	0.362064	1	-	-2.13052	0.121304	-	-4.13691	2.10241e-61	DN	-2.03398	0.243989	-	-4.31895	9.16395e-36	DN	-4.16512	5.8758e-24	DN	-5.15338	5.11892e-36	DN	-4.65433	5.94146e-55	DN	-2.57021	1.62394e-10	DN	-3.67847	2.84974e-24	DN	-3.30284	0.000915695	DN	-0.553071	1	-	-1.80794	1	-	-2.78784	0.0309509	-	-2.2235	1	-
ENSMUSG00000038457	Tmem255b	7.36555	4.51841e-228	UP	0.78645	1	-	-2.4308	0.158075	-	-4.89087	2.59717e-44	DN	-2.33426	0.265756	-	-3.49501	1.73773e-18	DN	-4.27551	1.30121e-15	DN	-4.92137	5.42192e-21	DN	-4.3299	7.20017e-32	DN	-2.40404	9.20579e-07	DN	-4.54604	1.3654e-18	DN	-4.48843	0.00152658	DN	-0.544257	1	-	-2.57771	0.858179	-	-3.97344	0.0197533	-	0.59501	1	-
ENSMUSG00000041986	Elmod1	7.35099	1.23134e-279	UP	0.0777827	1	-	-2.06601	0.154814	-	-5.07321	1.94143e-61	DN	-3.78062	0.0430933	-	-4.06003	3.77148e-28	DN	-4.87359	8.17761e-23	DN	-3.60205	1.75316e-21	DN	-5.33378	3.02031e-50	DN	-2.54845	3.2382e-09	DN	-3.25745	5.49174e-18	DN	-2.75908	0.00979123	DN	-0.818555	1	-	-1.43484	1	-	-3.83208	0.00659503	DN	-0.265009	1	-
ENSMUSG00000090291	Lrrc10b	7.34907	6.49372e-269	UP	1.315	1	-	-2.20827	0.138124	-	-4.32908	8.08112e-50	DN	-1.43076	0.466827	-	-3.62465	1.98393e-23	DN	-3.94084	8.14029e-18	DN	-3.84546	2.52398e-21	DN	-3.907	7.02684e-36	DN	-1.66942	5.29972e-05	-	-2.90925	9.01102e-15	DN	-2.67819	0.0139642	-	-2.06117	1	-	-3.09325	0.583624	-	-2.48609	0.0830016	-	1.08099	1	-
ENSMUSG00000062444	Ap3b2	7.32338	1.56707e-266	UP	0.494605	1	-	-2.51567	0.0881451	-	-4.24531	8.69719e-49	DN	-2.41913	0.201922	-	-3.30023	3.39006e-21	DN	-4.0962	2.13132e-18	DN	-4.41876	5.90502e-24	DN	-4.03769	7.33419e-37	DN	-2.54291	1.28075e-08	DN	-3.6614	6.63344e-19	DN	-3.4016	0.00304957	DN	-0.458798	1	-	-1.07487	1	-	-4.47351	0.00351069	DN	-0.906439	1	-
ENSMUSG00000097248	Gm2694	7.30313	1.59018e-228	UP	1.80018	0.169999	-	-1.22868	0.571455	-	-4.30878	3.0583e-39	DN	-1.13214	0.684488	-	-3.67889	4.80671e-19	DN	-3.81312	4.80125e-14	DN	-4.40029	5.73671e-19	DN	-4.5951	1.47268e-32	DN	-2.20442	4.30332e-06	DN	-2.56361	2.3758e-10	DN	-2.28673	0.0619924	-	-0.347086	1	-	-1.37917	1	-	-2.77489	0.0965101	-	0.792181	1	-
ENSMUSG00000078630	Tomt	7.2943	2.01998e-226	UP	0.0959795	1	-	-2.1639	0.1989	-	-4.48283	8.37848e-40	DN	-2.06737	0.308478	-	-3.60882	2.28006e-18	DN	-4.33164	3.85229e-15	DN	-4.33061	2.20971e-18	DN	-3.42265	1.11964e-24	DN	-2.77983	7.24704e-08	DN	-3.00388	3.55233e-12	DN	-3.22045	0.0135147	-	0.308976	1	-	-2.31138	0.819216	-	-3.7071	0.0271571	-	1.44824	1	-
ENSMUSG00000025129	Ppp1r27	7.29326	2.99061e-283	UP	1.50545	0.459222	-	-1.82657	0.221496	-	-3.87427	4.60781e-51	DN	-1.73003	0.332849	-	-3.23942	2.04707e-23	DN	-4.03061	1.02705e-20	DN	-3.28989	1.86552e-20	DN	-3.83052	4.65367e-40	DN	-2.54066	1.5788e-09	DN	-3.47171	2.25716e-20	DN	-2.61968	0.0111369	-	-0.679383	1	-	-1.71146	1	-	-3.10719	0.0209426	-	-0.541368	1	-
ENSMUSG00000024897	Apba1	7.25751	5.69896e-255	UP	0.708004	1	-	-1.17983	0.566743	-	-4.01752	3.06409e-44	DN	-0.930194	0.758636	-	-3.73045	5.83495e-23	DN	-3.02073	3.31709e-13	DN	-2.59531	2.83122e-13	DN	-3.87549	7.44043e-34	DN	-2.30172	2.13688e-07	DN	-3.29125	3.45973e-16	DN	-3.24125	0.00495092	DN	-1.88558	1	-	-1.91658	1	-	-4.31339	0.00572997	DN	0.840819	1	-
ENSMUSG00000050505	Pcdh20	7.2458	1.65587e-298	UP	-0.901412	1	-	-1.70062	0.242471	-	-4.62753	4.98367e-69	DN	-3.37444	0.045318	-	-5.17546	6.08176e-42	DN	-4.9155	6.70207e-28	DN	-4.60761	9.29787e-33	DN	-5.48525	4.88527e-63	DN	-2.28433	5.43419e-09	DN	-1.37981	5.22626e-06	-	-3.67747	0.000283202	DN	-0.734665	1	-	-2.03018	0.984838	-	-2.28599	0.0840528	-	-1.18197	1	-
ENSMUSG00000005716	Pvalb	7.23699	4.65424e-139	UP	2.49725	0.0238094	-	-2.80411	0.286599	-	-5.6841	1.16167e-33	DN	-1.38086	0.853525	-	-2.4402	3.12906e-08	DN	-3.79719	6.99297e-10	DN	-2.59953	1.00569e-07	DN	-5.26202	2.48023e-25	DN	-2.68023	3.35758e-05	DN	-4.06772	1.59594e-11	DN	-3.27403	0.0715921	-	0.255326	1	-	-2.36491	1	-	-2.75904	0.340203	-	-0.193559	1	-
ENSMUSG00000030302	Atp2b2	7.20355	1.059e-209	UP	-1.3984	1	-	-1.84962	0.326916	-	-3.94864	4.94532e-35	DN	-2.16966	0.3107	-	-5.45972	1.42372e-24	DN	-4.43405	3.65999e-15	DN	-3.75041	5.07215e-16	DN	-5.31077	1.47375e-34	DN	-1.57297	0.000903941	-	-5.12116	5.75946e-19	DN	-3.32263	0.0129344	-	-0.379823	1	-	-2.41345	0.88119	-	-1.21649	0.689543	-	-0.242097	1	-
ENSMUSG00000025380	Fscn2	7.18655	1.51694e-216	UP	1.66872	0.385289	-	-1.27879	0.571455	-	-3.88206	9.54256e-34	DN	-1.50602	0.490683	-	-2.77392	1.69971e-13	DN	-3.17964	2.65446e-11	DN	-3.33043	4.49056e-14	DN	-4.20807	1.48607e-28	DN	-2.48045	1.17804e-06	DN	-3.45016	1.39273e-13	DN	-2.48935	0.0534454	-	-1.13517	1	-	-1.16542	1	-	-1.97436	0.289483	-	0.00409983	1	-
ENSMUSG00000107167	Gm34653	7.18606	8.6097e-199	UP	-0.174263	1	-	-1.31101	0.570894	-	-3.68775	1.03186e-28	DN	-2.21896	0.316095	-	-3.32335	1.34035e-14	DN	-3.57127	2.56356e-11	DN	-6.22472	4.14529e-19	DN	-3.62042	2.44146e-22	DN	-2.51287	4.02984e-06	DN	-4.16597	3.62376e-14	DN	-1.78094	0.176443	-	-0.844848	1	-	-1.87693	0.999792	-	-3.27266	0.0673573	-	0.294418	1	-
ENSMUSG00000026644	Acbd7	7.15351	0	UP	1.36941	0.576524	-	-2.09905	0.103789	-	-4.17285	3.95098e-70	DN	-1.74999	0.289281	-	-3.48214	1.23034e-31	DN	-3.98512	6.86055e-26	DN	-3.8686	5.69203e-31	DN	-3.85068	6.98245e-51	DN	-0.579325	0.161627	-	-3.58325	1.70022e-26	DN	-3.64209	0.000107815	DN	-0.561532	1	-	-1.05181	1	-	-3.27934	0.00543525	DN	-0.07533	1	-
ENSMUSG00000026452	Syt2	7.12389	6.40373e-173	UP	-0.0668266	1	-	-3.01851	0.131376	-	-3.73804	4.20713e-25	DN	-1.91922	0.390859	-	-3.3881	5.73385e-13	DN	-5.60294	3.82701e-13	DN	-3.91723	1.38512e-12	DN	-4.79487	6.29722e-24	DN	-2.6306	1.18296e-05	DN	-3.2747	6.08185e-10	DN	-1.48017	0.326229	-	-0.545632	1	-	-0.574963	1	-	-2.97344	0.140569	-	0.593635	1	-
ENSMUSG00000066279	Chrna10	7.11873	3.58027e-206	UP	-0.444554	1	-	-1.75052	0.347177	-	-4.62534	2.6919e-39	DN	-1.3304	0.567563	-	-4.35577	9.12554e-21	DN	-4.01137	6.60722e-14	DN	-5.0742	7.83004e-20	DN	-4.94688	1.49317e-32	DN	-1.85225	0.00011849	-	-3.27359	6.74414e-13	DN	-4.2254	0.00353277	DN	-1.2826	1	-	-0.726415	1	-	-2.70876	0.124139	-	-0.143331	1	-
ENSMUSG00000020799	Tekt1	7.10595	6.17733e-238	UP	1.72231	0.179458	-	-1.60683	0.36244	-	-4.8062	6.6876e-49	DN	-3.10012	0.129194	-	-4.21173	2.1363e-24	DN	-4.19126	3.91901e-17	DN	-4.09634	2.09053e-20	DN	-4.05852	1.16926e-33	DN	-0.23759	0.799347	-	-3.33776	1.09107e-15	DN	-2.341	0.0402717	-	-1.72499	1	-	-0.430283	1	-	-2.56541	0.0870328	-	0.41549	1	-
ENSMUSG00000038132	Rbm24	7.09296	5.27817e-252	UP	0.149171	1	-	-1.99543	0.183622	-	-4.45208	1.47314e-51	DN	-2.90168	0.129691	-	-4.44826	1.69674e-28	DN	-4.84383	3.6289e-21	DN	-2.6594	2.47661e-14	DN	-5.03936	9.90353e-45	DN	-1.81359	1.30335e-05	-	-2.1189	7.29216e-10	DN	-4.05403	0.000690178	DN	-2.11216	1	-	-2.14331	0.957213	-	-3.53904	0.0145895	-	0.0280379	1	-
ENSMUSG00000035916	Ptprq	7.07948	4.89824e-243	UP	-1.81363	1	-	-1.35351	0.472912	-	-4.07071	6.20544e-46	DN	-3.43366	0.0828194	-	-4.91154	1.2559e-29	DN	-4.52581	1.53644e-19	DN	-5.43526	3.56953e-27	DN	-5.50264	7.87134e-46	DN	-1.53799	0.000225675	-	-3.3716	5.68789e-17	DN	-2.6753	0.0174814	-	-0.47139	1	-	-3.09036	0.595885	-	-1.8963	0.2477	-	0.0819502	1	-
ENSMUSG00000096257	Ccer2	7.06835	4.80326e-249	UP	1.06192	1	-	-2.38554	0.112874	-	-4.42217	1.40092e-59	DN	-3.42883	0.0708634	-	-5.13006	7.38541e-38	DN	-4.42747	4.93625e-23	DN	-4.66218	6.39863e-30	DN	-4.33331	2.85209e-46	DN	-1.76325	1.54223e-05	-	-3.69178	6.63175e-22	DN	-3.99529	0.000370919	DN	-1.79023	1	-	-0.59566	1	-	-2.9941	0.0364801	-	0.0867768	1	-
ENSMUSG00000032818	Loxhd1	7.02194	1.96461e-214	UP	-0.0902632	1	-	-1.22755	0.588408	-	-4.22933	1.43505e-40	DN	-2.94514	0.170532	-	-4.42108	3.05009e-23	DN	-4.30013	4.71504e-16	DN	-5.94867	5.66264e-24	DN	-5.50032	1.69329e-38	DN	-1.76581	9.915e-05	-	-3.07297	2.9859e-13	DN	-4.51296	0.00129759	DN	-0.568802	1	-	-1.60088	1	-	-1.40623	0.533577	-	-0.430887	1	-
ENSMUSG00000059022	Kcp	7.01578	1.81298e-239	UP	0.15157	1	-	-1.86702	0.235749	-	-4.05529	2.09446e-45	DN	-1.77048	0.336487	-	-3.38429	3.79358e-21	DN	-3.86343	4.91899e-17	DN	-1.2522	6.42792e-05	-	-3.76081	1.75811e-33	DN	-2.65263	6.95141e-09	DN	-3.29673	1.67354e-16	DN	-2.92394	0.00993828	DN	-0.397186	1	-	-2.01525	0.973842	-	-3.41097	0.0218474	-	-0.844911	1	-
ENSMUSG00000068011	Mkrn2os	6.9718	1.21581e-261	UP	1.15622	1	-	-1.75383	0.233831	-	-2.60844	2.56965e-31	DN	-1.98054	0.265628	-	-2.37925	7.20969e-16	DN	-2.94915	6.15895e-15	DN	-5.66412	2.8953e-33	DN	-3.59385	1.90522e-37	DN	-2.22695	4.37525e-08	DN	-3.46334	2.22183e-20	DN	-2.96335	0.00396224	DN	-0.606832	1	-	-1.05263	1	-	-3.45034	0.010053	-	-0.468881	1	-
ENSMUSG00000066392	Nrxn3	6.97115	6.49463e-268	UP	-2.55305	1	-	-1.67732	0.263193	-	-4.18402	2.771e-59	DN	-3.3931	0.051112	-	-4.2824	1.19686e-33	DN	-5.26523	1.03611e-27	DN	-5.58778	6.62548e-36	DN	-5.09739	3.53202e-56	DN	-1.21582	0.00144073	-	-2.8652	4.15693e-17	DN	-3.95956	0.000189734	DN	-1.43229	1	-	-0.723934	1	-	-3.12214	0.016232	-	-1.87898	1	-
ENSMUSG00000024749	Tmc1	6.89938	4.39521e-247	UP	-0.93007	1	-	-1.47552	0.383689	-	-4.04096	8.02148e-52	DN	-2.96928	0.104471	-	-4.34512	8.24626e-31	DN	-3.47099	2.29976e-17	DN	-5.97281	2.73539e-33	DN	-5.26015	1.43138e-51	DN	-1.72492	1.62413e-05	-	-3.44933	1.13093e-19	DN	-4.53707	0.000124223	DN	-1.00864	1	-	-1.62502	1	-	-1.43045	0.447961	-	-0.455	1	-
ENSMUSG00000108398	Gm30191	6.88454	5.35897e-252	UP	1.24359	1	-	-1.71335	0.260456	-	-5.37639	7.69896e-69	DN	-1.90755	0.282786	-	-3.44764	2.96295e-25	DN	-4.58852	2.77618e-23	DN	-4.27056	5.26537e-27	DN	-4.13952	1.50302e-43	DN	0.59684	0.0577742	-	-3.85349	6.97774e-23	DN	-2.83782	0.00614216	DN	-0.704215	1	-	-1.1501	1	-	-3.54768	0.00864703	DN	-0.566179	1	-
ENSMUSG00000033949	Trim36	6.86241	5.98574e-189	UP	0.403044	1	-	-2.65476	0.133115	-	-4.03274	4.11378e-34	DN	-3.55999	0.137773	-	-3.51215	8.39136e-17	DN	-3.22855	3.29964e-11	DN	-3.55111	1.3878e-14	DN	-4.25704	3.26703e-28	DN	-2.03689	3.89311e-05	DN	-4.18248	1.09794e-15	DN	-3.12469	0.0222092	-	0.404848	1	-	-0.627234	1	-	-3.61146	0.0408038	-	-0.0443836	1	-
ENSMUSG00000003354	Ccdc65	6.8372	1.66238e-189	UP	1.53736	0.742629	-	-1.27143	0.581455	-	-4.08479	2.64281e-34	DN	-2.50235	0.249769	-	-4.20008	1.83515e-19	DN	-5.18332	6.25139e-16	DN	-2.6763	6.81041e-11	DN	-4.37245	1.23006e-28	DN	-1.38208	0.00353716	-	-2.25421	3.85174e-08	DN	-4.07065	0.00528578	DN	-1.12784	1	-	-1.15809	1	-	-1.96701	0.301582	-	0.0114232	1	-
ENSMUSG00000047021	Cfap65	6.8351	4.15214e-128	UP	-2.25547	1	-	-1.37894	0.62538	-	-4.25082	1.14212e-20	DN	-2.28668	0.414882	-	-3.56388	2.68143e-10	DN	-3.96338	2.87701e-08	DN	-5.29021	1.67517e-11	DN	-3.13765	9.56285e-13	DN	-2.58121	0.000247039	DN	-2.89907	1.01479e-06	DN	-1.25962	0.521555	-	0.0896626	1	-	-0.942419	1	-	-1.33387	0.781968	-	1.22893	1	-
ENSMUSG00000036766	Dner	6.74527	1.16294e-183	UP	-0.617092	1	-	-1.9748	0.285867	-	-3.83674	4.38144e-32	DN	-2.46512	0.262989	-	-3.41808	3.79973e-16	DN	-3.55356	5.48596e-12	DN	-1.50796	3.35272e-05	-	-4.1631	2.75949e-27	DN	-2.29601	6.24303e-06	DN	-2.58645	1.4908e-09	DN	-3.03158	0.0241091	-	-0.0887739	1	-	-2.12274	0.96773	-	-3.51847	0.0503671	-	0.0486081	1	-
ENSMUSG00000072663	Spef2	6.73585	6.77109e-161	UP	-0.656784	1	-	-2.11419	0.274699	-	-4.30539	1.78188e-29	DN	-2.01766	0.372913	-	-5.30772	1.47431e-18	DN	-3.69348	1.75925e-10	DN	-4.01603	1.93935e-13	DN	-4.89367	2.69219e-25	DN	-0.74645	0.173302	-	-2.02844	4.51635e-06	DN	-0.988832	0.579148	-	-0.643884	1	-	-0.673397	1	-	-2.06912	0.324152	-	0.495382	1	-
ENSMUSG00000004035	Gstm7	6.72861	1.25522e-195	UP	0.914284	1	-	-2.89223	0.0824497	-	-4.4989	3.5312e-41	DN	-2.79569	0.184879	-	-3.9053	2.66916e-20	DN	-4.15023	3.99188e-15	DN	-2.06233	1.26681e-08	DN	-4.20387	7.53575e-31	DN	0.109584	0.949834	-	-1.95431	2.45773e-07	-	-3.36215	0.00907377	DN	-1.42085	1	-	0.729028	0.984838	-	-1.84416	0.324978	-	-0.281583	1	-
ENSMUSG00000016200	Syt14	6.68643	1.94504e-204	UP	-0.180378	1	-	-1.31709	0.503753	-	-3.4448	5.68989e-35	DN	-1.70853	0.390211	-	-3.85342	7.20771e-22	DN	-5.12901	5.49208e-19	DN	-2.4246	2.43707e-11	DN	-2.97252	1.42306e-23	DN	-1.44896	0.000887435	-	-2.5691	2.88797e-11	DN	-1.2686	0.337852	-	-1.65921	1	-	-0.36427	1	-	-2.49951	0.113464	-	-0.519938	1	-
ENSMUSG00000042678	Myo15	6.68545	3.20802e-133	UP	-0.201548	1	-	-1.66182	0.546448	-	-3.67375	1.27126e-20	DN	-0.232757	1	-	-3.84829	3.47896e-12	DN	-5.24977	7.79042e-11	DN	-3.56175	8.20907e-10	DN	-3.62139	3.19322e-16	DN	-2.27357	0.000308741	DN	-3.50972	4.91417e-09	DN	-3.13526	0.0677227	-	-0.192453	1	-	-1.22453	1	-	-1.02826	0.886337	-	0.946814	1	-
ENSMUSG00000032514	Ttc21a	6.60798	6.4479e-150	UP	-0.471752	1	-	-0.599498	1	-	-4.21387	8.43453e-29	DN	-3.10012	0.21741	-	-3.56818	5.465e-14	DN	-4.19126	1.54516e-11	DN	-3.77197	1.09447e-12	DN	-4.38413	1.50933e-23	DN	-1.67763	0.00167656	-	-2.70766	1.73472e-08	DN	-0.649477	0.883488	-	0.278654	1	-	-1.75586	1	-	-3.15158	0.118509	-	0.41549	1	-
ENSMUSG00000037716	Ccdc33	6.55818	3.54778e-149	UP	0.721728	1	-	-0.805067	0.933379	-	-3.99897	1.89041e-27	DN	-1.45058	0.549875	-	-3.99859	2.13564e-15	DN	-3.12392	4.88815e-09	DN	-4.03653	2.49028e-13	DN	-4.09916	3.75092e-22	DN	-3.01593	1.21899e-06	DN	-1.41177	0.00113531	-	-2.01705	0.160415	-	-0.664276	1	-	-1.69636	1	-	-0.759996	1	-	0.474991	1	-
ENSMUSG00000028865	Cd164l2	6.48557	2.81839e-262	UP	0.264595	1	-	-1.81523	0.168164	-	-2.51263	5.46489e-36	DN	-2.00361	0.213108	-	-2.92549	8.80659e-26	DN	-3.61753	9.6104e-24	DN	-5.13884	8.10119e-43	DN	-2.68717	4.38742e-32	DN	-0.689756	0.0749228	-	-2.17243	1.89955e-13	DN	-1.84232	0.0506348	-	-0.984065	1	-	-0.861663	1	-	-1.99345	0.121784	-	-2.0163	1	-
ENSMUSG00000026649	Cfap126	6.47188	2.55961e-190	UP	1.52482	0.592759	-	-1.14221	0.621686	-	-2.87782	1.76528e-28	DN	-0.721219	0.973741	-	-2.40083	5.45833e-13	DN	-3.26342	2.44141e-13	DN	-2.64039	1.3557e-12	DN	-2.56398	1.07057e-19	DN	-1.41816	0.00107534	-	-2.06226	1.71268e-08	DN	-2.61717	0.0269803	-	-0.676876	1	-	-0.706447	1	-	-1.77899	0.315633	-	-0.538863	1	-
ENSMUSG00000048416	Mlf1	6.45574	3.48235e-248	UP	2.0035	0.00932775	UP	-1.43654	0.362564	-	-4.15728	1.25821e-63	DN	-3.22045	0.0516206	-	-2.92131	2.49668e-23	DN	-3.67081	1.19715e-21	DN	-2.19006	1.91943e-13	DN	-3.26491	5.37852e-38	DN	-0.0531659	1	-	-3.38626	1.23766e-22	DN	-2.04472	0.0369319	-	-1.10751	1	-	-0.0632338	1	-	-1.26519	0.525391	-	-0.705954	1	-
ENSMUSG00000034472	Rasd2	6.45412	1.18792e-166	UP	1.37403	1	-	-0.649448	0.988836	-	-3.51277	7.06422e-30	DN	-1.55999	0.484002	-	-2.92361	6.83571e-14	DN	-3.4283	7.90516e-12	DN	-2.8471	1.05071e-11	DN	-3.51471	1.03794e-23	DN	-1.37582	0.00379651	-	-0.753586	0.0770935	-	-1.80276	0.164962	-	-0.187178	1	-	-1.21926	1	-	-1.02296	0.829264	-	-0.0496714	1	-
ENSMUSG00000050875	Minar2	6.44455	4.61313e-185	UP	1.74169	0.202521	-	-0.855439	0.830642	-	-4.52615	1.21035e-43	DN	-2.93837	0.161809	-	-4.22026	7.55823e-23	DN	-4.02893	1.36042e-15	DN	-3.11815	8.65295e-15	DN	-4.81136	5.43332e-36	DN	0.553623	0.129288	-	-2.33749	9.18079e-10	DN	-3.50483	0.00567097	DN	-1.56338	1	-	-0.268099	1	-	0.201992	1	-	0.577241	1	-
ENSMUSG00000056895	Hist3h2ba	6.41747	9.34703e-252	UP	1.68907	0.110733	-	-0.994309	0.644614	-	-3.73085	8.48789e-58	DN	-2.81284	0.0842741	-	-3.63007	2.33256e-31	DN	-4.2418	8.26238e-26	DN	-3.48253	1.10428e-25	DN	-4.09414	4.89502e-51	DN	0.611226	0.038317	-	-2.43401	5.67483e-15	DN	-2.677	0.00421326	DN	-0.436495	1	-	-0.559091	1	-	-0.810617	0.881899	-	-0.29871	1	-
ENSMUSG00000034467	Dynlrb2	6.29947	1.07763e-175	UP	1.70533	0.244203	-	-2.01796	0.225262	-	-4.3623	5.53124e-45	DN	-1.24005	0.614992	-	-3.82415	3.54721e-22	DN	-2.8236	1.51806e-11	DN	-4.07255	3.80413e-20	DN	-4.20659	2.07083e-34	DN	1.19353	3.25511e-05	-	-3.60217	9.04241e-17	DN	-1.80651	0.136815	-	-0.870305	1	-	-0.089536	1	-	-2.29592	0.157277	-	0.268962	1	-
ENSMUSG00000021508	Cxcl14	6.17934	1.31101e-224	UP	-0.0196711	1	-	-0.955029	0.676938	-	-4.61047	1.77782e-78	DN	-2.42245	0.141213	-	-4.36775	3.62455e-41	DN	-4.01661	3.75774e-26	DN	0.252107	0.369309	-	-3.67062	6.18143e-48	DN	-2.94993	5.62908e-14	DN	-1.20216	3.82713e-05	-	-3.49255	0.000187206	DN	0.391366	1	-	-1.84532	1	-	-3.39328	0.0041072	DN	-0.675113	1	-
ENSMUSG00000030729	Pgm2l1	6.16744	4.19797e-223	UP	-0.264852	1	-	-1.43875	0.351956	-	-2.83379	2.44255e-39	DN	-2.42453	0.149737	-	-3.28264	4.89485e-27	DN	-3.56764	7.11822e-21	DN	-2.59723	3.22735e-17	DN	-3.12276	6.45562e-36	DN	0.505093	0.105446	-	-1.60292	7.82003e-08	-	-2.25143	0.0179893	-	-0.897906	1	-	0.214853	1	-	-1.555	0.313498	-	-0.496466	1	-
ENSMUSG00000041762	Gpr155	6.15754	7.74178e-149	UP	0.0930881	1	-	-0.694618	0.949469	-	-3.78598	4.77724e-31	DN	-2.41523	0.270388	-	-4.3775	2.12741e-19	DN	-4.09229	3.14951e-13	DN	-1.79019	1.99584e-06	-	-3.01489	1.37285e-19	DN	-1.15747	0.0164764	-	-0.788387	0.0641058	-	-1.65389	0.228331	-	-1.04084	1	-	-1.07097	1	-	0.650351	0.69914	-	1.10038	1	-
ENSMUSG00000086848	Lce6a	6.15273	1.0583e-182	UP	1.88734	0.0470583	-	-1.44623	0.430092	-	-1.56125	2.54544e-13	-	-2.00474	0.282757	-	-2.13082	1.19819e-12	DN	-2.67006	2.54659e-12	DN	-4.49147	7.40983e-26	DN	-3.87025	2.11883e-37	DN	-1.3853	0.000667365	-	-2.41699	5.24154e-12	DN	-1.78988	0.107434	-	-0.115308	1	-	-1.47006	1	-	-2.27934	0.129409	-	-1.30093	1	-
ENSMUSG00000028943	Espn	6.09377	6.69788e-230	UP	1.12194	1	-	-1.2443	0.43147	-	-3.13182	7.73873e-54	DN	-2.84012	0.0570076	-	-3.82214	7.3888e-40	DN	-4.18224	5.26344e-31	DN	-2.87174	2.22134e-23	DN	-2.63306	1.82971e-33	DN	-1.25196	0.000261513	-	0.0327173	1	-	-2.71892	0.00151705	DN	-1.66706	1	-	-1.69788	1	-	-0.947476	0.734013	-	-1.04274	1	-
ENSMUSG00000026679	Enkur	6.07821	7.41754e-167	UP	1.74595	0.173932	-	-1.02263	0.687006	-	-3.1058	7.38627e-31	DN	-2.34796	0.230046	-	-2.95308	1.64144e-16	DN	-4.28924	1.1855e-16	DN	-3.33916	3.90192e-16	DN	-2.59845	6.78026e-20	DN	0.375329	0.358257	-	-2.21025	3.18788e-09	DN	-2.17473	0.0597916	-	-0.557945	1	-	1.42917	0.33552	-	-1.17157	0.646541	-	-0.42004	1	-
ENSMUSG00000063919	Srrm4	6.00914	4.09888e-130	UP	0.312519	1	-	-0.236578	1	-	-2.87662	1.40216e-21	DN	-3.32667	0.169559	-	-3.60213	1.95515e-15	DN	-6.00764	2.09965e-15	DN	-2.12454	1.79216e-07	DN	-1.96336	1.1301e-10	-	-1.9085	0.000237842	-	-2.34192	1.00695e-07	DN	-1.07327	0.549065	-	-0.950327	1	-	-0.393289	1	-	-1.78901	0.428104	-	0.18894	1	-
ENSMUSG00000034427	Myo15b	5.94834	2.92611e-121	UP	-0.420101	1	-	-0.547847	1	-	-2.81952	4.12096e-20	DN	-0.256487	1	-	-3.22026	2.41183e-13	DN	-1.91992	1.50585e-05	-	-3.94461	9.06211e-14	DN	-3.21543	1.15747e-18	DN	-0.823673	0.130592	-	-2.49661	5.81248e-08	DN	-1.83164	0.227723	-	0.106838	1	-	-1.9274	1	-	-3.32313	0.0840528	-	1.2461	1	-
ENSMUSG00000027676	Ccdc39	5.9243	1.08883e-133	UP	0.699542	1	-	0.0595941	1	-	-3.63491	1.24099e-29	DN	-2.44804	0.265176	-	-4.41044	1.92174e-19	DN	-5.12901	2.7807e-15	DN	-1.2579	0.000545127	-	-3.21283	9.32895e-21	DN	-0.84499	0.0977486	-	-1.38891	0.00044615	-	-0.0825886	1	-	-1.07361	1	-	0.907713	0.833369	-	-0.162232	1	-	0.0656592	1	-
ENSMUSG00000023236	Scg5	5.86355	5.69788e-196	UP	0.628488	1	-	-1.14659	0.541719	-	-4.02902	1.4302e-60	DN	-2.77324	0.0952337	-	-3.72914	4.39949e-31	DN	-3.86314	1.58562e-22	DN	-3.99174	8.8779e-29	DN	-5.13416	2.56581e-60	DN	0.978489	0.000218859	-	-1.16105	0.000109525	-	-2.444	0.0109706	-	0.256922	1	-	1.20568	0.373015	-	-0.66738	1	-	1.10581	1	-
ENSMUSG00000006575	Rundc3a	5.8406	4.16379e-156	UP	1.56745	0.466782	-	-1.71705	0.311105	-	-1.77986	6.95521e-15	-	-1.94379	0.30473	-	-2.29134	2.12748e-12	DN	-3.29469	1.5274e-13	DN	-2.93099	2.02176e-14	DN	-1.4967	2.16357e-09	-	-1.83568	2.88189e-05	-	-1.68139	1.65172e-06	-	-0.6893	0.762749	-	-0.570154	1	-	-1.01592	1	-	-1.18384	0.642801	-	-0.432237	1	-
ENSMUSG00000071073	Lrrc73	5.81736	1.29558e-159	UP	1.41582	0.786641	-	-1.78862	0.257246	-	-2.88837	3.4629e-31	DN	-0.950812	0.76199	-	-3.09038	3.37001e-19	DN	-3.36659	5.91883e-15	DN	-0.595536	0.0710929	-	-2.26947	2.86393e-18	DN	-0.0166709	1	-	-2.24723	2.33814e-10	DN	-2.25854	0.0427183	-	0.0971516	1	-	0.0693666	1	-	-0.863696	0.887223	-	0.234275	1	-
ENSMUSG00000040724	Kcna2	5.78192	1.31631e-145	UP	-1.08821	1	-	-1.63339	0.358785	-	-4.16149	1.13971e-42	DN	-2.54044	0.210028	-	-4.40948	8.2782e-25	DN	-4.48205	1.29057e-17	DN	-4.31679	6.43865e-21	DN	-4.08528	3.25813e-33	DN	1.72044	3.42409e-11	-	-3.15561	1.82221e-14	DN	-3.1069	0.0101747	-	-1.75144	1	-	1.56122	0.249011	-	-2.17567	0.194298	-	0.389017	1	-
ENSMUSG00000090223	Pcp4	5.76855	9.07598e-161	UP	2.27997	0.00257366	UP	-0.71511	0.949973	-	-4.68235	3.76596e-61	DN	-1.8487	0.332991	-	-3.50217	4.35738e-25	DN	-4.65568	2.13809e-23	DN	-1.94066	9.03577e-10	-	-3.01637	2.16738e-29	DN	-1.99324	1.37233e-06	-	-3.37549	2.93401e-19	DN	-3.68156	0.00090405	DN	-0.738757	1	-	-0.920918	1	-	3.56437	8.8397e-20	UP	0.664024	1	-
ENSMUSG00000039628	Hs3st6	5.74952	1.56413e-165	UP	1.39278	0.692804	-	-0.675457	0.926264	-	-3.7563	2.01836e-48	DN	-2.51516	0.161687	-	-3.25157	4.26522e-23	DN	-4.05425	2.48863e-20	DN	-2.28686	8.06265e-13	DN	-2.51959	1.38452e-23	DN	1.10846	3.31566e-05	-	-1.69904	9.80992e-08	-	-2.40136	0.0192233	-	-0.461471	1	-	-1.49355	1	-	-0.630386	1	-	-1.32439	1	-
ENSMUSG00000029765	Plxna4	5.74334	2.29654e-155	UP	-0.822682	1	-	-0.950427	0.697201	-	-4.5664	2.00206e-49	DN	-3.18501	0.100671	-	-4.29711	4.81543e-26	DN	-4.54061	5.80992e-19	DN	-2.46035	1.93202e-12	DN	-3.96143	1.30493e-34	DN	1.43211	3.67381e-08	-	-1.56166	3.69957e-06	-	-3.16536	0.00551663	DN	0.193626	1	-	2.19402	0.0232752	-	0.433961	0.889228	-	-0.670544	1	-
ENSMUSG00000042750	Bex2	5.73646	1.62248e-146	UP	1.65495	0.275526	-	-1.46615	0.426137	-	-3.71124	9.09648e-38	DN	-2.37364	0.219054	-	-2.97914	8.18635e-17	DN	-4.31496	7.83921e-17	DN	-1.74731	2.00889e-07	-	-3.49489	3.97184e-28	DN	1.03574	0.000435915	-	-1.02994	0.00383129	-	-2.9401	0.0129233	-	0.742349	1	-	-0.613002	1	-	0.540537	0.802089	-	1.14197	1	-
ENSMUSG00000017969	Ptgis	5.73488	1.64309e-153	UP	1.61415	0.279679	-	-2.00655	0.191839	-	-3.77401	9.4154e-44	DN	-1.49313	0.42721	-	-3.60399	2.57439e-23	DN	-3.26072	6.98073e-15	DN	1.03115	6.06867e-06	-	-4.19509	2.25417e-38	DN	-1.92299	4.7081e-06	-	-2.02052	4.28308e-09	DN	-2.74043	0.013258	-	0.883212	1	-	-1.56852	1	-	-2.54829	0.0844446	-	1.01878	1	-
ENSMUSG00000021262	Evl	5.63647	1.0583e-182	UP	0.882557	1	-	-1.13894	0.514286	-	-3.06392	9.96371e-48	DN	-1.96469	0.218844	-	-3.55479	1.0869e-32	DN	-4.22885	1.3167e-27	DN	-0.440395	0.151386	-	-2.11264	3.25153e-22	DN	0.437462	0.163392	-	-1.80774	3.96314e-10	-	-3.00212	0.00089226	DN	-0.591015	1	-	-0.70319	1	-	-0.475529	1	-	-0.300929	1	-
ENSMUSG00000048442	Smim5	5.56431	4.60921e-124	UP	0.750108	1	-	-0.598518	1	-	-0.891163	0.000130446	-	-1.02096	0.742204	-	-1.21025	0.000101816	-	-2.80002	1.8526e-10	DN	-3.65898	2.26293e-16	DN	-1.88398	6.27507e-12	-	-1.52561	0.000823598	-	-1.8388	1.17412e-06	-	-2.81567	0.0241091	-	0.543636	1	-	-0.904945	1	-	-1.07243	0.77384	-	0.679982	1	-
ENSMUSG00000035984	Nme5	5.56145	9.5964e-141	UP	1.55363	0.466782	-	-2.50328	0.0934999	-	-2.41649	1.65086e-23	DN	-1.9904	0.280009	-	-2.93741	3.90203e-17	DN	-4.67137	2.45821e-18	DN	-2.20858	1.87502e-10	DN	-2.78866	1.3197e-22	DN	1.23399	6.54582e-06	-	-1.39529	4.50052e-05	-	-1.74557	0.130035	-	-0.616675	1	-	0.683673	0.963125	-	-0.329583	1	-	-0.478716	1	-
ENSMUSG00000032373	Car12	5.48079	8.77248e-151	UP	-0.407534	1	-	-0.0511837	1	-	-4.5935	6.58479e-62	DN	-2.93674	0.102819	-	-4.08002	1.23051e-30	DN	-3.76262	9.14633e-20	DN	-3.79348	1.94821e-24	DN	-3.27837	4.00131e-34	DN	1.4659	6.7176e-09	-	-1.52874	1.34526e-06	-	-2.50048	0.0147009	-	-1.88395	1	-	2.29244	0.0104644	-	-2.50169	0.0708617	-	0.2564	1	-
ENSMUSG00000024033	Rsph1	5.44479	2.28458e-124	UP	1.49155	0.692804	-	-1.03521	0.690276	-	-1.31166	5.32758e-09	-	-0.785459	0.947925	-	-1.33068	9.10367e-06	-	-2.06846	5.95517e-08	DN	-3.19797	1.01106e-15	DN	-1.23163	8.22934e-07	-	-0.913674	0.0428555	-	-2.12762	7.68644e-09	DN	-2.35795	0.048094	-	0.261723	1	-	-0.18299	1	-	-3.16849	0.0422401	-	0.398587	1	-
ENSMUSG00000075334	Rprm	5.41992	1.35521e-120	UP	1.02543	1	-	-0.99458	0.730869	-	-3.73439	2.10643e-39	DN	-2.78062	0.172036	-	-3.83713	1.26998e-22	DN	-4.23515	2.03622e-17	DN	0.0797927	0.921456	-	-4.42824	1.22701e-36	DN	-1.59795	0.000265322	-	0.866034	0.00123314	-	-1.75604	0.147985	-	-0.404276	1	-	-3.02334	0.708295	-	-1.60564	0.412915	-	0.734991	1	-
ENSMUSG00000032246	Calml4	5.40336	5.76763e-170	UP	1.58854	0.122743	-	-1.08815	0.522584	-	-4.17968	1.96095e-81	DN	-1.60716	0.301653	-	-3.59281	8.6845e-38	DN	-3.88457	4.68095e-29	DN	-2.72798	2.86872e-22	DN	-4.3376	5.30388e-68	DN	1.99846	4.78489e-21	-	-1.46812	7.04717e-08	-	-2.90424	0.000543471	DN	-0.439038	1	-	0.297813	1	-	-1.55314	0.258585	-	-0.825262	1	-
ENSMUSG00000050556	Kcnb1	5.30683	5.24067e-122	UP	-0.970563	1	-	0.10777	1	-	-4.19354	3.21028e-41	DN	-1.49017	0.441072	-	-5.10364	3.30999e-26	DN	-3.68274	1.46458e-14	DN	-2.39939	3.96562e-11	DN	-3.98091	3.00337e-31	DN	0.672583	0.0445957	-	0.974677	0.000127062	-	-2.38004	0.0405291	-	0.146246	1	-	0.11861	1	-	-2.28156	0.154058	-	-0.302406	1	-
ENSMUSG00000040189	Ccdc114	5.28265	2.76574e-114	UP	-1.89214	1	-	0.464471	0.783119	-	-2.78114	2.55297e-26	DN	-3.92746	0.0734055	-	-3.19684	1.6386e-17	DN	-4.01661	1.81207e-15	DN	-1.84211	1.0596e-07	-	-2.71975	1.59947e-20	DN	0.789803	0.0148677	-	-1.32558	0.000222557	-	-0.776961	0.690253	-	-0.549748	1	-	2.15187	0.0417458	-	-1.16333	0.696478	-	-0.41185	1	-
ENSMUSG00000020577	Tspan13	5.16221	7.71495e-144	UP	-0.0710584	1	-	-0.85112	0.734005	-	-2.72477	1.12318e-40	DN	-2.87952	0.0618332	-	-3.59769	2.84221e-33	DN	-4.92149	7.68208e-32	DN	-1.81942	3.67335e-11	-	-2.9398	2.30266e-36	DN	0.826471	0.00172948	-	0.470575	0.0856533	-	-1.39763	0.151952	-	0.13582	1	-	0.159094	1	-	0.400196	0.809943	-	-2.53635	1	-
ENSMUSG00000038594	Cep85l	5.15245	3.34803e-96	UP	0.221136	1	-	-0.200429	1	-	-2.62423	3.4466e-20	DN	-1.28454	0.62607	-	-3.98536	1.61072e-17	DN	-3.64145	1.04029e-11	DN	0.164853	0.76262	-	-1.9686	3.2728e-11	-	-0.57885	0.296482	-	-0.873822	0.0348981	-	-0.670353	0.853094	-	-0.914599	1	-	0.383783	1	-	0.138462	1	-	1.2268	1	-
ENSMUSG00000063296	Tmem117	5.02715	2.52988e-106	UP	-1.3187	1	-	-0.0709776	1	-	-3.09954	1.30858e-32	DN	-4.16425	0.0445774	-	-3.18532	5.03339e-19	DN	-4.03088	6.96238e-17	DN	-2.55585	1.16241e-12	DN	-3.56138	2.92591e-30	DN	1.98448	4.21775e-16	-	-1.74779	4.94752e-07	-	-2.13993	0.0572453	-	-1.78791	1	-	3.20686	7.49098e-06	UP	-1.20756	0.625679	-	-0.648641	1	-
ENSMUSG00000049493	Pls1	5.02267	2.00114e-118	UP	0.47622	1	-	-0.545784	1	-	-1.81583	3.80077e-18	-	-1.24415	0.521006	-	-1.40385	2.17105e-07	-	-1.83274	3.95378e-08	-	-4.12135	3.66302e-25	DN	-2.63815	3.64377e-25	DN	1.39334	2.80971e-08	-	-0.893105	0.00602203	-	-2.46588	0.0152259	-	-1.33442	1	-	0.732944	0.859209	-	-1.43392	0.412681	-	-0.19515	1	-
ENSMUSG00000015968	Cacna1d	5.01008	3.00599e-94	UP	-0.495237	1	-	0.391549	0.911062	-	-4.53697	6.04642e-40	DN	-1.70438	0.421116	-	-3.98804	5.13316e-20	DN	-4.80199	2.98569e-16	DN	-0.239476	0.656733	-	-5.58555	6.18742e-36	DN	1.02294	0.00108579	-	-2.38378	2.93646e-09	DN	-2.68748	0.0339735	-	-0.331232	1	-	2.77609	0.00151477	UP	1.96344	0.00100852	-	0.808035	1	-
ENSMUSG00000028637	Ccdc30	4.98477	3.43001e-108	UP	-0.283998	1	-	-0.606479	0.974987	-	-4.08755	1.98285e-46	DN	-4.33081	0.0292221	-	-4.8073	2.89915e-29	DN	-5.42475	4.61019e-22	DN	-0.871841	0.00511854	-	-4.29053	2.26012e-38	DN	2.20663	1.68115e-21	UP	-1.99557	6.42661e-09	-	-0.975823	0.487224	-	-0.953437	1	-	2.64789	0.00125282	UP	-1.05101	0.699782	-	-0.815206	1	-
ENSMUSG00000049555	Tmie	4.96774	1.44121e-106	UP	0.359373	1	-	-0.58689	1	-	-1.42434	2.06139e-11	-	-0.584389	1	-	0.125812	0.771677	-	-1.71982	6.33134e-07	-	-4.69484	1.53365e-25	DN	-2.7566	2.03586e-24	DN	-0.185419	0.914185	-	-1.02181	0.00234191	-	-2.06421	0.0569569	-	-0.125088	1	-	-1.57313	1	-	-0.736316	1	-	0.0123412	1	-
ENSMUSG00000030276	Ttll3	4.95096	9.58177e-100	UP	-0.805611	1	-	0.719264	0.50135	-	-2.22177	4.85109e-21	DN	-0.83682	0.871285	-	-2.76083	3.51312e-16	DN	-3.3912	1.44215e-14	DN	-1.58432	1.1791e-06	-	-1.72396	8.01957e-12	-	0.342777	0.40739	-	-2.0928	5.05423e-09	DN	0.33396	0.835608	-	-0.929418	1	-	1.22537	0.450713	-	-0.43658	1	-	-0.791204	1	-
ENSMUSG00000036111	Lmo1	4.9491	1.03219e-111	UP	1.79861	0.0797054	-	-1.21189	0.522857	-	-2.37925	1.55088e-26	DN	-1.35784	0.474165	-	-3.34058	2.02911e-23	DN	-3.40635	7.21999e-17	DN	-2.11852	2.55732e-11	DN	0.556504	0.00563924	-	-1.36539	0.000552321	-	-1.28601	5.75219e-05	-	-1.68182	0.120208	-	-0.446096	1	-	-0.891742	1	-	-2.55124	0.0627423	-	-1.30904	1	-
ENSMUSG00000030761	Myo7a	4.94544	9.84047e-100	UP	-0.795638	1	-	0.340778	0.934786	-	-1.13259	3.65423e-07	-	-1.50932	0.453941	-	-1.67381	6.68093e-08	-	-2.32314	5.2105e-09	DN	-0.398707	0.291827	-	-1.88398	9.52629e-13	-	-1.1947	0.00595968	-	-0.818839	0.028484	-	-0.685512	0.766697	-	-1.46074	1	-	-0.488446	1	-	-2.30067	0.144978	-	0.679982	1	-
ENSMUSG00000034227	Foxj1	4.94069	8.56331e-96	UP	0.74453	1	-	-1.21476	0.588485	-	-1.61628	1.94656e-12	-	-2.12301	0.286863	-	-2.57674	4.05946e-14	DN	-3.20942	4.21569e-13	DN	-3.65872	5.8844e-18	DN	-1.75059	1.50518e-11	-	1.57038	4.40191e-09	-	-1.46758	3.28751e-05	-	-0.870113	0.628872	-	0.253332	1	-	1.83032	0.127668	-	-0.355118	1	-	1.3926	1	-
ENSMUSG00000051041	Olfml1	4.88969	3.33634e-98	UP	-0.668372	1	-	-1.5382	0.389331	-	-4.22828	1.18006e-43	DN	-2.4455	0.210028	-	-4.31414	1.53423e-24	DN	-5.7127	1.42881e-20	DN	0.796357	0.00122913	-	-4.58075	1.09221e-36	DN	1.68454	4.63436e-11	-	-2.79278	9.88774e-13	DN	-3.59819	0.0035719	DN	-0.0691537	1	-	1.98597	0.0692869	-	-2.08065	0.205758	-	0.483877	1	-
ENSMUSG00000018800	Abca5	4.87582	6.10962e-93	UP	-1.16899	1	-	0.133493	1	-	-2.91463	2.45175e-27	DN	-2.20472	0.266183	-	-3.25573	1.67033e-17	DN	-3.88117	1.1681e-14	DN	1.1368	1.53347e-06	-	-2.45035	1.1324e-17	DN	-0.835492	0.0721613	-	-1.02475	0.0049227	-	-1.17715	0.397688	-	0.588167	1	-	-0.860459	1	-	0.894351	0.387357	-	-0.277082	1	-
ENSMUSG00000032020	Ubash3b	4.86681	6.00322e-104	UP	-0.443017	1	-	-0.0163391	1	-	-3.24051	3.19084e-36	DN	-3.1873	0.0952337	-	-3.65622	5.0797e-23	DN	-4.54291	2.21291e-19	DN	-0.237821	0.600481	-	-1.88124	3.09335e-14	-	0.988985	0.000452326	-	0.313146	0.448515	-	-1.74688	0.111601	-	-0.224848	1	-	0.753404	0.869385	-	-0.417623	1	-	-0.67283	1	-
ENSMUSG00000045725	Prr15	4.83213	2.00373e-116	UP	1.16283	1	-	-1.15833	0.51053	-	-2.2267	3.96674e-29	DN	-2.28988	0.15712	-	-2.37554	1.32491e-18	DN	-3.64252	9.79716e-23	DN	-3.54647	3.60733e-27	DN	-2.02124	2.60802e-20	DN	2.05215	4.53824e-21	UP	-0.77967	0.0110144	-	-2.63324	0.00389433	DN	-1.17905	1	-	0.80132	0.685856	-	-1.83707	0.169117	-	-0.0397851	1	-
ENSMUSG00000037166	Ppp1r14a	4.83167	6.78819e-90	UP	1.78498	0.14998	-	-1.16225	0.610442	-	-1.51702	2.0907e-11	-	-0.530765	1	-	-1.14238	0.000117511	-	-2.37748	1.87166e-09	DN	0.537205	0.0523163	-	-1.51538	2.23849e-09	-	-2.06916	4.44665e-06	DN	-1.94639	7.44068e-08	-	-1.21381	0.376488	-	0.135191	1	-	-1.31303	1	-	-1.2882	0.610289	-	0.858319	1	-
ENSMUSG00000055254	Ntrk2	4.79066	2.40073e-103	UP	-0.434284	1	-	-0.358132	1	-	-5.18754	3.81002e-63	DN	-2.79944	0.132885	-	-3.90907	2.03114e-27	DN	-4.01573	1.07332e-19	DN	0.814563	0.000456332	-	-4.34666	3.29405e-43	DN	1.89566	1.58082e-15	-	-2.82447	2.5012e-15	DN	-3.78168	0.000733479	DN	0.750574	1	-	1.96584	0.0534357	-	-2.8509	0.0381247	-	0.716171	1	-
ENSMUSG00000001504	Irx2	4.74217	3.00309e-109	UP	0.711756	1	-	-0.340747	1	-	-1.46315	1.96068e-14	-	-1.36324	0.422331	-	-2.0537	1.24545e-14	DN	-2.96123	3.18134e-17	DN	-0.986239	0.00034933	-	-1.10199	1.59577e-07	-	-1.25471	0.000527233	-	0.152667	0.791642	-	-1.65236	0.0928463	-	-0.432573	1	-	-0.569021	1	-	0.792466	0.351722	-	0.220418	1	-
ENSMUSG00000018411	Mapt	4.64711	6.81905e-102	UP	0.6959	1	-	0.0066963	1	-	-4.13338	1.24947e-60	DN	-2.75719	0.100671	-	-3.32977	1.02141e-26	DN	-5.43816	3.19915e-29	DN	-2.46075	1.2881e-15	DN	-3.5567	7.71825e-41	DN	2.67168	4.72992e-38	UP	-1.10476	0.000244752	-	-1.31438	0.221905	-	-0.966839	1	-	2.34386	0.00504113	UP	-0.474355	1	-	-1.82911	1	-
ENSMUSG00000096472	Cdkn2d	4.64633	3.82247e-106	UP	1.11533	1	-	-1.18364	0.478807	-	-1.71525	9.32912e-20	-	-1.53718	0.339164	-	-0.903435	0.000212182	-	-1.25479	1.53719e-05	-	-0.116038	0.896024	-	-1.50952	3.88725e-13	-	0.180557	0.676755	-	-1.1712	3.82133e-05	-	-2.17108	0.0158638	-	-1.04051	1	-	-0.954842	1	-	-0.914546	0.760525	-	-0.164607	1	-
ENSMUSG00000042312	S100a13	4.64464	2.10281e-108	UP	1.69202	0.10061	-	-1.41545	0.315674	-	-1.75915	7.7321e-23	-	-0.258791	1	-	-0.76922	0.000895813	-	0.482218	0.0438849	-	-1.52351	1.64777e-09	-	-2.79415	1.11214e-39	DN	0.506051	0.0960808	-	-1.77431	3.059e-11	-	-2.90453	0.00043479	DN	-1.02527	1	-	-1.52114	1	-	-1.50068	0.294112	-	-0.78599	1	-
ENSMUSG00000027605	Acss2	4.59528	1.00869e-83	UP	0.489062	1	-	0.227587	1	-	-1.65781	1.43987e-13	-	-1.766	0.354143	-	-0.760826	0.00877205	-	-1.00971	0.00302162	-	-0.674617	0.0400957	-	-1.26814	1.90814e-07	-	-0.820651	0.0615181	-	-1.11502	0.00124032	-	-0.313968	1	-	-1.71647	1	-	0.0661427	1	-	-0.429119	1	-	0.424015	1	-
ENSMUSG00000101655	2310040G24Rik	4.59148	2.27176e-90	UP	0.884523	1	-	-1.40124	0.41184	-	-2.64519	3.02963e-29	DN	-3.31102	0.0734055	-	-2.35443	2.17328e-14	DN	-3.66164	7.15733e-17	DN	-1.87963	3.50306e-09	-	-2.82982	2.02704e-25	DN	2.43612	2.40968e-28	UP	-0.641287	0.0787181	-	-2.06487	0.0525095	-	0.0674261	1	-	0.0395534	1	-	0.574091	0.67445	-	-0.796456	1	-
ENSMUSG00000070565	Rasal2	4.52326	3.36052e-93	UP	-0.584285	1	-	-0.0579643	1	-	-1.26639	6.76019e-11	-	-1.97738	0.233289	-	-1.42626	4.52994e-08	-	-2.6424	4.77112e-14	DN	-1.25488	8.67349e-06	-	-0.939495	1.17632e-05	-	0.506003	0.110103	-	-0.980254	0.00132967	-	-0.895204	0.505017	-	-1.77507	1	-	0.372176	1	-	0.378321	0.871933	-	-0.635806	1	-
ENSMUSG00000025813	Homer2	4.48567	1.48817e-78	UP	0.446231	1	-	0.506702	0.735616	-	-1.19462	4.35734e-08	-	-2.48323	0.195235	-	-1.91669	5.20729e-10	-	-3.03626	8.03661e-13	DN	-1.22431	0.000124806	-	-1.52852	7.62762e-10	-	0.440736	0.239829	-	-0.894878	0.0114652	-	-1.82233	0.10947	-	-0.10689	1	-	-0.399521	1	-	2.22187	1.52654e-05	UP	-0.555067	1	-
ENSMUSG00000030838	Ush1c	4.46323	1.05981e-83	UP	-0.0921992	1	-	-0.905169	0.717928	-	-4.05183	2.76647e-51	DN	-1.9145	0.281053	-	-3.54059	6.35733e-25	DN	-4.81865	7.03256e-23	DN	-3.63	5.92908e-22	DN	-4.6898	3.16714e-46	DN	2.99172	3.99718e-47	UP	-2.08684	2.75114e-10	DN	-3.7065	0.000727491	DN	-0.0251578	1	-	2.78071	0.000255919	UP	-1.06813	0.683032	-	-1.21097	1	-
ENSMUSG00000028926	Cdk14	4.40487	9.21612e-87	UP	0.175575	1	-	0.3992	0.77611	-	-2.2067	3.76868e-26	DN	-0.753696	0.893484	-	-2.00622	2.63604e-13	DN	-2.00815	9.84569e-10	DN	0.971966	5.44867e-06	-	-1.87662	1.27947e-16	-	-0.781991	0.0460362	-	-0.205635	0.801191	-	-1.24915	0.251907	-	-1.12478	1	-	0.172442	1	-	-1.22328	0.525028	-	-1.5717	1	-
ENSMUSG00000019737	Syne4	4.27183	2.05299e-85	UP	0.684953	1	-	0.744873	0.354423	-	-2.3293	2.23756e-32	DN	-2.25883	0.153728	-	-2.5909	8.41884e-22	DN	-4.55144	1.39091e-29	DN	-3.19412	8.23501e-25	DN	-1.74478	1.02608e-16	-	1.07903	1.30188e-05	-	0.956596	9.50028e-06	-	-1.43122	0.138562	-	-1.26368	1	-	0.981714	0.524121	-	1.79252	0.00036737	-	-2.44767	1	-
ENSMUSG00000024713	Pcsk5	4.26635	1.76029e-73	UP	-0.990526	1	-	-0.9566	0.694481	-	-4.27226	1.4306e-57	DN	-3.53266	0.0484914	-	-4.81731	2.1909e-35	DN	-4.62506	8.6839e-24	DN	2.83907	8.37331e-57	UP	-4.59563	9.83637e-49	DN	-1.84379	2.69495e-06	-	-2.58488	2.20155e-14	DN	-3.36095	0.001319	DN	0.722959	1	-	-0.963605	1	-	-1.57872	0.347574	-	-0.602612	1	-
ENSMUSG00000047747	Rnf150	4.23916	3.24292e-74	UP	-0.242608	1	-	0.12198	1	-	-2.622	1.02375e-30	DN	-2.60946	0.144193	-	-3.2974	4.42923e-23	DN	-3.37413	1.1379e-16	DN	0.962489	1.24405e-05	-	-2.41525	4.86395e-22	DN	0.945187	0.000606491	-	0.235934	0.611311	-	-0.769027	0.628872	-	0.353551	1	-	0.833396	0.74177	-	-0.744621	0.961074	-	-1.09641	1	-
ENSMUSG00000042808	Gpx2	4.23556	1.4073e-86	UP	1.60056	0.139856	-	-1.3253	0.347896	-	-2.52725	2.40889e-43	DN	-1.86529	0.210786	-	-3.44111	1.93241e-38	DN	-4.29546	3.79641e-36	DN	-4.27719	1.04689e-44	DN	-0.730359	0.000140729	-	2.19783	8.42202e-27	UP	-0.440914	0.181009	-	-2.20027	0.00759845	DN	-0.699507	1	-	-0.08142	1	-	1.16577	0.0750274	-	-0.950809	1	-
ENSMUSG00000057098	Ebf1	4.19277	1.99256e-80	UP	-0.828148	1	-	0.1479	1	-	-4.19944	1.37602e-78	DN	-3.43521	0.0154947	-	-3.93868	9.23243e-41	DN	-4.3526	7.23292e-32	DN	0.578846	0.0105139	-	-4.54624	7.87117e-69	DN	2.29083	2.73533e-28	UP	-2.79933	7.69619e-21	DN	-3.70167	2.77742e-05	DN	-2.17539	1	-	3.27253	1.42909e-07	UP	-2.54149	0.0253966	-	-2.03656	1	-
ENSMUSG00000030086	Chchd6	4.18082	7.68449e-79	UP	1.43281	0.371458	-	-1.05111	0.568029	-	-1.26796	5.55224e-12	-	-1.71101	0.280009	-	-2.32031	1.49299e-18	DN	-3.34779	2.4615e-21	DN	-0.249809	0.509119	-	-0.996385	1.01462e-06	-	0.892911	0.000555334	-	-0.214347	0.762343	-	-1.76783	0.0576991	-	-1.26535	1	-	-0.527884	1	-	0.660831	0.480062	-	-2.44934	1	-
ENSMUSG00000056596	Trnp1	4.15525	2.098e-77	UP	1.054	1	-	-1.53098	0.264783	-	-1.15448	2.87257e-10	-	-1.98944	0.210028	-	-1.74854	3.35541e-12	-	-3.28348	7.88125e-21	DN	0.307692	0.234718	-	-1.2966	2.44976e-10	-	1.19442	7.92894e-07	-	-0.911899	0.00171533	-	-1.87468	0.0402424	-	-1.52383	1	-	-0.645177	1	-	-1.35968	0.390361	-	-1.38526	1	-
ENSMUSG00000044080	S100a1	4.11392	3.2991e-81	UP	1.19917	1	-	-1.29064	0.357653	-	-2.7876	1.17305e-51	DN	-1.66769	0.264802	-	-2.50184	2.05122e-25	DN	-2.94701	3.8919e-23	DN	-2.34411	6.67042e-20	DN	-3.39427	1.57342e-56	DN	2.86768	3.08574e-52	UP	-0.221331	0.666459	-	-2.39697	0.00269806	DN	-0.464122	1	-	0.424837	0.963629	-	0.305423	1	-	-0.666244	1	-
ENSMUSG00000038903	Ccdc68	4.11271	1.93989e-71	UP	0.886947	1	-	-0.869206	0.734933	-	0.0262195	1	-	-2.02069	0.219054	-	-0.543908	0.0399792	-	-3.34579	1.83222e-19	DN	-3.52009	2.99396e-25	DN	-0.761222	0.000355841	-	-0.432825	0.35181	-	-0.800177	0.0102403	-	-0.906061	0.478339	-	-0.298293	1	-	-1.55323	1	-	-0.824135	0.859367	-	-0.383281	1	-
ENSMUSG00000039298	Cdk5rap2	4.1	6.33328e-73	UP	0.690807	1	-	-0.329868	1	-	-1.36951	5.30954e-13	-	-2.2862	0.161809	-	-1.87581	7.91795e-13	-	-3.73908	2.83878e-22	DN	-0.505317	0.0924554	-	-0.958038	4.50321e-06	-	1.0913	1.50094e-05	-	-0.677924	0.0349044	-	-0.722886	0.645684	-	-0.273382	1	-	0.987502	0.543603	-	1.64141	0.00227554	-	0.0571084	1	-
ENSMUSG00000044252	Osbpl1a	4.09807	6.95368e-71	UP	0.543979	1	-	-0.303062	1	-	-1.37755	1.47733e-12	-	-1.31565	0.461632	-	-1.50592	8.49001e-09	-	-4.10414	9.93149e-23	DN	0.0817026	0.882053	-	-1.60192	3.71226e-13	-	1.07666	2.99013e-05	-	-0.47987	0.206673	-	-0.926793	0.475086	-	-0.166479	1	-	0.928879	0.639197	-	0.808696	0.344487	-	-0.614555	1	-
ENSMUSG00000020895	Tmem107	4.04453	3.40356e-66	UP	0.961706	1	-	-0.579414	0.985983	-	-1.32342	2.98091e-11	-	-1.18042	0.549792	-	-2.25539	4.40446e-15	DN	-3.97758	1.00007e-20	DN	-0.134153	0.857364	-	-0.418578	0.0820032	-	0.732638	0.0119646	-	-0.442158	0.283129	-	-0.854562	0.547298	-	-0.510866	1	-	-0.3695	1	-	0.371572	0.901438	-	1.21477	1	-
ENSMUSG00000031284	Pak3	3.99983	1.02193e-67	UP	0.0606992	1	-	-0.46949	1	-	-0.967793	1.93499e-07	-	-1.9337	0.224656	-	-2.08235	2.29846e-15	DN	-3.95948	1.06662e-24	DN	0.179222	0.564952	-	0.0416715	0.968448	-	-0.143268	0.97168	-	-1.00518	0.000587082	-	-0.177417	1	-	-1.3686	1	-	-0.0725314	1	-	-1.39748	0.379373	-	-0.229338	1	-
ENSMUSG00000054708	Ankrd24	3.99731	1.40747e-62	UP	0.149171	1	-	0.0694846	1	-	-1.56398	2.31329e-14	-	-1.34374	0.460067	-	-2.41999	4.18429e-16	DN	-4.31571	1.28111e-21	DN	0.197888	0.553239	-	-1.2566	2.25959e-08	-	0.775668	0.00768047	-	-0.278216	0.634364	-	-1.11573	0.349007	-	-1.43353	1	-	1.68839	0.130834	-	0.413573	0.845449	-	-1.295	1	-
ENSMUSG00000000552	Zfp385a	3.97621	9.35047e-63	UP	1.03843	1	-	-0.785138	0.819044	-	-1.03378	1.96037e-07	-	-0.776824	0.874699	-	-1.29799	1.18473e-06	-	-1.84832	2.63074e-08	-	0.600772	0.0128636	-	-0.161527	0.652724	-	-1.78124	4.93706e-06	-	-0.989034	0.0017965	-	-0.692575	0.710438	-	-0.825362	1	-	-0.855179	1	-	-3.25317	0.0144424	-	-0.271812	1	-
ENSMUSG00000047428	Dlk2	3.91908	2.4103e-60	UP	0.170542	1	-	-0.0776582	1	-	-0.961405	9.75158e-07	-	-1.66537	0.326936	-	-3.59733	9.32734e-28	DN	-4.48444	6.63453e-24	DN	-2.55209	1.05268e-15	DN	0.914847	3.05783e-07	-	-2.77996	2.9991e-11	DN	-0.0191446	1	-	0.634696	0.382793	-	-0.166479	1	-	-2.20035	0.876905	-	-3.18044	0.0129283	-	-0.0289979	1	-
ENSMUSG00000023277	Twf2	3.90807	1.92532e-63	UP	0.673204	1	-	-0.674429	0.8895	-	-0.623313	0.00115553	-	-2.32459	0.151506	-	-0.959696	0.000106688	-	-3.07643	3.35279e-18	DN	-0.187601	0.684417	-	-0.489857	0.0256204	-	-0.568236	0.161976	-	-0.321018	0.494534	-	-1.24482	0.22954	-	-1.12048	1	-	-0.689901	1	-	0.229844	1	-	0.0187839	1	-
ENSMUSG00000042249	Grk3	3.90282	1.57802e-46	UP	-1.97526	1	-	1.16324	0.184017	-	-3.33614	7.2481e-29	DN	-3.59488	0.129691	-	-3.2809	5.18374e-16	DN	-4.68744	2.43845e-15	DN	-2.10232	3.02498e-08	DN	-3.99928	3.18214e-27	DN	2.61381	6.41349e-27	UP	-0.00339969	1	-	-1.56774	0.243436	-	0.369872	1	-	3.56983	4.35e-07	UP	-0.308825	1	-	-0.0792751	1	-
ENSMUSG00000089774	Slc5a3	3.89671	7.93082e-63	UP	-0.752235	1	-	0.609705	0.504544	-	-1.29651	5.39439e-12	-	-2.52885	0.117933	-	-1.77422	6.03891e-12	-	-2.63408	4.13077e-15	DN	0.951963	5.16221e-06	-	-1.00344	1.39495e-06	-	-0.330108	0.534333	-	-0.76091	0.0140025	-	0.0290733	1	-	-0.322838	1	-	0.511503	0.971045	-	-0.344635	1	-	-1.18597	1	-
ENSMUSG00000026854	Usp20	3.87883	4.7758e-54	UP	0.0691025	1	-	0.890443	0.324711	-	-1.37915	9.85686e-11	-	-1.19667	0.578138	-	-1.35961	1.72529e-06	-	-3.58611	3.28632e-16	DN	-0.413435	0.251624	-	-1.00274	1.86413e-05	-	0.672203	0.0347721	-	-0.474124	0.277362	-	-0.215345	1	-	-1.9983	1	-	1.57786	0.206741	-	1.11061	0.149665	-	0.141969	1	-
ENSMUSG00000038150	Ormdl3	3.86784	3.46661e-66	UP	0.0171745	1	-	-0.752609	0.795258	-	-1.10582	1.46284e-10	-	-1.86706	0.216467	-	-0.994705	2.09372e-05	-	-1.75828	9.72317e-10	-	-0.0944424	0.953618	-	-1.15711	3.71908e-09	-	0.685615	0.00988691	-	-0.295976	0.52714	-	-0.405232	1	-	0.418734	1	-	0.0796018	1	-	-0.141837	1	-	-1.81607	1	-
ENSMUSG00000027223	Mapk8ip1	3.86681	4.81027e-59	UP	0.909395	1	-	-0.503544	1	-	-1.76143	9.0886e-18	-	-1.93175	0.254819	-	-2.50738	3.10039e-17	DN	-3.95753	3.07867e-20	DN	-0.770727	0.00837781	-	-2.11356	5.45376e-19	DN	1.99645	1.03435e-18	-	0.289411	0.462765	-	-1.9813	0.0508934	-	-0.780921	1	-	1.66996	0.131585	-	1.15825	0.0933217	-	-1.22817	1	-
ENSMUSG00000037493	Cib2	3.82242	1.65027e-61	UP	1.12901	1	-	-1.64886	0.205983	-	-0.0921533	0.808491	-	-1.27069	0.452633	-	-0.456634	0.0772594	-	-1.38269	1.21693e-06	-	-2.07699	2.01517e-14	DN	-0.0590189	0.954621	-	-0.330771	0.516481	-	-1.82503	6.22863e-11	-	-2.15372	0.0132715	-	-0.988396	1	-	-2.14618	0.854012	-	-1.868	0.134601	-	-1.43544	1	-
ENSMUSG00000006651	Aplp1	3.80027	1.58367e-59	UP	-0.36649	1	-	-1.00587	0.607744	-	-2.22639	9.09541e-28	DN	-3.16599	0.0496714	-	-2.59209	8.17484e-20	DN	-3.25035	1.54214e-18	DN	1.97468	3.74389e-27	-	-2.71818	1.16348e-29	DN	0.949152	0.000277538	-	-0.996862	0.000818563	-	-1.19783	0.263944	-	1.12364	1	-	0.509509	1	-	-0.68283	0.970459	-	0.349618	1	-
ENSMUSG00000064181	Rab3ip	3.79573	5.02795e-61	UP	0.70142	1	-	-1.19945	0.450276	-	-0.171956	0.487672	-	-1.5058	0.335926	-	-0.0233285	1	-	-0.840404	0.00287188	-	-1.64876	6.13347e-10	-	-0.934623	3.07968e-06	-	-0.944154	0.00689295	-	-0.423208	0.260871	-	-1.4266	0.133067	-	-0.778292	1	-	-1.64016	1	-	-1.34197	0.386797	-	-1.05552	1	-
ENSMUSG00000022240	Ctnnd2	3.76042	2.43124e-49	UP	0.487198	1	-	1.07786	0.179757	-	-0.867384	5.07497e-05	-	-1.82949	0.31138	-	-2.77399	1.4252e-16	DN	-3.36591	1.30916e-14	DN	-2.26856	3.66094e-11	DN	-0.1572	0.694846	-	-0.85414	0.0466185	-	0.562706	0.0601175	-	0.403981	0.762749	-	-0.192453	1	-	0.00254586	1	-	1.52449	0.0166959	-	-0.640487	1	-
ENSMUSG00000033502	Cdc14a	3.73311	4.55853e-56	UP	-0.573246	1	-	0.532237	0.604922	-	-0.43609	0.0327582	-	-0.409852	1	-	0.0901411	0.856399	-	-1.57027	2.47194e-07	-	-2.1832	8.51696e-14	DN	-1.27846	1.32497e-09	-	-0.0436828	1	-	-0.602103	0.0723117	-	0.107025	1	-	-1.46268	1	-	0.840319	0.665814	-	-0.0640931	1	-	0.0921049	1	-
ENSMUSG00000048482	Bdnf	3.73237	7.22001e-54	UP	-0.553398	1	-	-0.863349	0.733932	-	-0.742626	9.02959e-05	-	-1.6794	0.302522	-	-1.46958	6.1354e-09	-	-3.71286	1.20001e-22	DN	1.37388	2.39944e-12	-	-0.796789	0.000146346	-	-2.80872	1.06493e-12	DN	-0.281787	0.605335	-	-0.808585	0.559113	-	-0.135978	1	-	-3.34082	0.422806	-	-3.73574	0.00199697	DN	-1.16947	1	-
ENSMUSG00000039680	Mrps6	3.71852	1.23242e-60	UP	0.973516	1	-	-0.908259	0.647767	-	-0.50902	0.00451126	-	-1.41843	0.353091	-	-0.977488	1.23857e-05	-	-2.76936	1.30911e-19	DN	-0.173254	0.650054	-	-0.480309	0.0158783	-	0.0430551	1	-	-0.55524	0.0601976	-	-1.47598	0.0996703	-	-0.528953	1	-	-0.773145	1	-	0.189886	1	-	-0.78996	1	-
ENSMUSG00000020340	Cyfip2	3.71675	1.11045e-53	UP	0.07548	1	-	-0.339889	1	-	-3.66323	5.79537e-49	DN	-3.78289	0.0275588	-	-3.47125	7.19857e-26	DN	-4.13587	2.09615e-21	DN	-1.40424	1.1412e-06	-	-2.73763	1.50993e-27	DN	3.1024	7.32644e-55	UP	0.425738	0.17094	-	-3.02515	0.00285536	DN	-0.0823476	1	-	1.38853	0.264034	-	-0.115643	1	-	-1.26804	1	-
ENSMUSG00000012296	Tjap1	3.7113	6.66955e-55	UP	0.2596	1	-	0.595485	0.523318	-	-1.0163	6.20859e-08	-	-1.21985	0.496882	-	-1.96947	7.44841e-14	-	-2.27356	2.67421e-12	DN	-0.201508	0.64771	-	0.0976014	0.767439	-	-0.60189	0.137963	-	-0.259801	0.649395	-	-0.450908	0.975557	-	-0.363881	1	-	-0.392843	1	-	-0.634121	1	-	-0.448787	1	-
ENSMUSG00000048096	Lmod1	3.70927	1.218e-51	UP	0.322679	1	-	-0.552192	1	-	-4.56408	5.53191e-60	DN	-1.2695	0.499859	-	-5.14741	3.23186e-36	DN	-4.53831	6.66103e-23	DN	-0.495352	0.122871	-	-4.40793	5.34666e-46	DN	3.63485	4.66955e-81	UP	-2.07644	1.25626e-10	DN	-3.42668	0.00103424	DN	-1.48531	1	-	2.68265	0.000484311	UP	-0.37443	1	-	-0.346039	1	-
ENSMUSG00000042215	Bag2	3.70473	2.44601e-54	UP	0.79559	1	-	-0.541714	1	-	-1.19811	1.8985e-10	-	-1.54639	0.343878	-	-1.37959	4.6827e-08	-	-3.80995	9.18067e-23	DN	-0.00234474	1	-	-0.761652	0.000292248	-	1.04539	4.07048e-05	-	-0.0072214	1	-	-1.55698	0.113453	-	-0.0802624	1	-	0.480226	0.990533	-	0.0336272	1	-	-0.943839	1	-
ENSMUSG00000047193	Dync2h1	3.69945	2.52919e-50	UP	-0.0399168	1	-	0.471223	0.730368	-	-1.42229	4.85161e-12	-	-1.2194	0.525946	-	-2.21204	7.69586e-14	DN	-3.41137	1.43251e-16	DN	0.288018	0.339993	-	-1.03118	5.05817e-06	-	0.711376	0.0185328	-	-0.0502006	1	-	0.00129867	1	-	-0.170345	1	-	1.33817	0.323688	-	1.47962	0.0162735	-	0.552993	1	-
ENSMUSG00000041556	Fbxo2	3.67207	2.92299e-59	UP	0.919084	1	-	-0.883294	0.665433	-	-3.21587	7.88794e-65	DN	-1.9661	0.180058	-	-3.10665	5.34194e-34	DN	-3.757	5.82193e-31	DN	-2.8662	4.49947e-26	DN	-3.36819	5.74444e-54	DN	3.33743	9.32815e-77	UP	0.129754	0.86322	-	-2.70154	0.000668495	DN	-0.474836	1	-	0.626932	0.781911	-	0.623194	0.470675	-	-0.636843	1	-
ENSMUSG00000037190	Cyb561d2	3.60859	3.20184e-51	UP	-0.24505	1	-	-0.779071	0.785262	-	-0.576444	0.00273043	-	-2.32874	0.144418	-	-0.935197	0.000145578	-	-2.704	1.12872e-15	DN	-0.524279	0.0724179	-	-0.498657	0.021737	-	-0.0714312	1	-	-0.0595193	1	-	0.777053	0.214213	-	-0.122787	1	-	0.0981328	1	-	-0.177766	1	-	-0.400858	1	-
ENSMUSG00000029126	Nsg1	3.57698	5.06447e-48	UP	0.423083	1	-	-1.09989	0.570797	-	-4.50541	3.76596e-61	DN	-2.91785	0.0863748	-	-4.29342	2.39386e-32	DN	-4.42544	4.11327e-23	DN	3.75953	1.46211e-111	UP	-4.14061	8.13622e-45	DN	-3.41098	3.69882e-14	DN	-2.80483	2.05755e-16	DN	-2.48155	0.0116351	-	-0.541504	1	-	-0.987244	1	-	-2.96931	0.0203053	-	-0.403614	1	-
ENSMUSG00000019986	Ahi1	3.57467	2.03313e-45	UP	-0.200839	1	-	0.98406	0.206297	-	-2.64044	1.26692e-31	DN	-1.88791	0.282025	-	-3.07211	7.79655e-22	DN	-4.39825	4.90106e-22	DN	1.80489	4.43193e-20	-	-1.61152	2.56525e-12	-	0.208123	0.654484	-	-0.86432	0.00855105	-	-0.920221	0.503553	-	0.0719866	1	-	1.47333	0.230277	-	0.673999	0.527063	-	0.209147	1	-
ENSMUSG00000068748	Ptprz1	3.5578	1.48378e-48	UP	-0.186729	1	-	0.936807	0.205442	-	-2.12579	1.3624e-26	DN	-2.69195	0.0938631	-	-4.33129	7.18466e-38	DN	-4.78634	8.58651e-29	DN	-0.641196	0.0249379	-	0.702759	7.81562e-05	-	-0.742555	0.0535801	-	0.0460304	1	-	2.03441	9.12858e-07	UP	1.14948	1	-	-0.173727	1	-	-2.42068	0.0493543	-	-0.593389	1	-
ENSMUSG00000024034	Tmprss3	3.54309	4.18803e-44	UP	-1.24862	1	-	-0.367768	1	-	-1.4583	1.9946e-12	-	-0.132001	1	-	0.309563	0.245846	-	1.27681	1.64474e-08	-	-3.60013	2.74761e-21	DN	-2.43585	7.80608e-22	DN	1.07212	7.54814e-05	-	-2.489	6.70667e-13	DN	-0.571202	0.859534	-	-0.230557	1	-	1.76149	0.110584	-	-2.07169	0.147549	-	-0.0929989	1	-
ENSMUSG00000028399	Ptprd	3.53911	3.23103e-41	UP	-0.640712	1	-	0.887169	0.346994	-	-3.11553	4.8544e-33	DN	-4.14319	0.0442584	-	-2.94885	1.64534e-17	DN	-4.82062	2.6228e-19	DN	1.20453	7.15584e-08	-	-2.1779	1.08863e-16	DN	1.44925	3.35976e-08	-	-0.0137761	1	-	-1.23838	0.326284	-	1.0476	1	-	2.64254	0.00163056	UP	0.149845	1	-	-0.627579	1	-
ENSMUSG00000031840	Rab3a	3.52455	1.59587e-47	UP	0.502224	1	-	-1.16357	0.50319	-	-0.555659	0.00535597	-	-2.17186	0.191374	-	-0.862187	0.000733176	-	-3.48298	3.85216e-19	DN	0.431382	0.0859208	-	-1.10709	2.34733e-07	-	0.700114	0.0141826	-	-0.400297	0.3385	-	-1.36847	0.185949	-	-1.02055	1	-	0.0694494	1	-	0.419549	0.842927	-	-1.46757	1	-
ENSMUSG00000028576	Ift74	3.50038	6.97311e-47	UP	0.632189	1	-	-0.210708	1	-	-0.780197	3.1686e-05	-	-1.85336	0.248165	-	-1.44579	8.46843e-09	-	-3.52855	1.81275e-21	DN	0.457059	0.057696	-	-0.446877	0.04517	-	0.328481	0.340322	-	-0.263803	0.633066	-	-1.11181	0.311568	-	0.522983	1	-	-0.208208	1	-	0.112571	1	-	-0.0421746	1	-
ENSMUSG00000027634	Ndrg3	3.47992	3.34635e-46	UP	0.175783	1	-	-0.485049	1	-	-1.2517	6.94662e-11	-	-2.23642	0.178185	-	-1.36652	1.0243e-07	-	-2.66385	2.54354e-14	DN	0.476649	0.0513016	-	-1.21	1.43453e-08	-	1.31514	6.82033e-08	-	-0.0511144	1	-	-1.14131	0.306665	-	-0.0831051	1	-	0.955748	0.62096	-	0.247671	1	-	0.0542694	1	-
ENSMUSG00000030275	Etnk1	3.44895	1.43858e-47	UP	-1.03124	1	-	1.08569	0.0960773	-	-1.20254	4.70159e-12	-	-1.4634	0.351265	-	-1.05405	8.30937e-06	-	-2.00092	1.446e-11	DN	-0.0252349	1	-	-0.858728	1.56548e-05	-	0.436508	0.149476	-	-0.493275	0.151586	-	0.76912	0.197068	-	-0.851362	1	-	1.60862	0.109839	-	0.421836	0.763973	-	-0.606206	1	-
ENSMUSG00000028525	Pde4b	3.37199	1.18344e-42	UP	-0.337959	1	-	0.52988	0.6019	-	-3.04108	1.17581e-44	DN	-1.96484	0.219054	-	-2.81656	5.9222e-23	DN	-3.31586	9.13732e-20	DN	-0.951198	0.000521415	-	-2.77751	1.11762e-31	DN	3.02739	4.23621e-55	UP	-0.304962	0.543192	-	-1.5878	0.102788	-	-1.17701	1	-	2.96012	1.35799e-05	UP	0.554034	0.639143	-	-2.03908	1	-
ENSMUSG00000044921	Rassf9	3.31245	1.68059e-35	UP	0.0802565	1	-	0.729418	0.463868	-	-0.91683	1.1436e-05	-	-2.49221	0.177371	-	-2.90097	1.20307e-18	DN	-4.36304	8.3512e-20	DN	-1.69382	7.31992e-08	-	-0.166714	0.648857	-	0.332202	0.399289	-	0.877023	0.00043451	-	0.628399	0.443	-	-1.11771	1	-	1.11393	0.502357	-	0.0599193	1	-	-0.97937	1	-
ENSMUSG00000010461	Eya4	3.30646	4.21829e-40	UP	-0.943064	1	-	1.33636	0.0361212	-	-2.82925	1.88315e-39	DN	-3.37515	0.0354975	-	-3.56261	1.03368e-29	DN	-4.35115	3.00952e-25	DN	-2.21589	6.33407e-14	DN	-2.1348	3.31702e-21	DN	2.7256	5.1485e-42	UP	0.718907	0.00292978	-	-0.495638	0.921634	-	-1.41434	1	-	2.99693	1.01686e-05	UP	0.269593	1	-	-0.860541	1	-
ENSMUSG00000021062	Rab15	3.27244	7.88826e-40	UP	0.368348	1	-	-0.463305	1	-	-0.769078	4.43092e-05	-	-2.29613	0.157208	-	-1.65258	1.01012e-10	-	-3.43856	1.4291e-20	DN	-1.8276	8.44299e-11	-	-0.025011	1	-	1.24202	3.42768e-07	-	0.551815	0.0339216	-	-1.16508	0.281593	-	0.0802085	1	-	-0.799399	1	-	-0.418234	1	-	0.369595	1	-
ENSMUSG00000058388	Phtf1	3.24671	2.68033e-39	UP	-0.0513159	1	-	-0.416474	1	-	-0.573578	0.00293668	-	-1.60983	0.316493	-	-1.27467	3.03966e-07	-	-2.91747	4.71412e-17	DN	0.255036	0.364453	-	0.00454607	1	-	0.00515624	1	-	-0.462137	0.215462	-	0.214832	0.947077	-	-1.04571	1	-	0.177445	1	-	-0.097875	1	-	-0.321962	1	-
ENSMUSG00000033577	Myo6	3.23165	1.53998e-41	UP	-0.0672899	1	-	0.271709	0.857767	-	-0.733363	1.96433e-05	-	0.100738	1	-	0.000874001	1	-	0.789411	0.000252478	-	-1.94475	6.17323e-14	-	-1.18162	3.59056e-10	-	-0.226531	0.739724	-	-0.829385	0.00282816	-	-0.37948	1	-	-1.20923	1	-	0.654329	0.776177	-	0.964394	0.14543	-	-0.771071	1	-
ENSMUSG00000032285	Dnaja4	3.22313	1.39585e-37	UP	0.505298	1	-	0.173509	1	-	-0.311641	0.161671	-	-1.71816	0.292669	-	-0.349878	0.232955	-	-1.72166	3.02863e-08	-	-0.697809	0.0138233	-	-0.419217	0.0679415	-	0.234312	0.554711	-	-0.296155	0.572511	-	-0.646885	0.749668	-	-1.34656	1	-	0.908111	0.624603	-	-0.703861	0.976994	-	-0.207294	1	-
ENSMUSG00000020121	Srgap1	3.22224	4.87702e-38	UP	0.029202	1	-	-0.137565	1	-	-0.0990103	0.815166	-	-1.94325	0.232276	-	-0.524703	0.0462809	-	-3.07784	1.11422e-17	DN	-1.08914	6.92493e-05	-	-0.223849	0.4211	-	0.886413	0.00082191	-	-1.22397	2.80772e-05	-	0.0525734	1	-	-0.306038	1	-	0.843205	0.679206	-	-1.61458	0.269594	-	-1.75444	1	-
ENSMUSG00000029669	Tspan12	3.20442	6.34048e-38	UP	-0.521242	1	-	-0.495406	1	-	-0.56284	0.00373563	-	-1.99432	0.210028	-	-1.15661	3.36793e-06	-	-3.99408	1.19865e-23	DN	-2.41129	5.68805e-16	DN	-0.874329	2.62128e-05	-	1.63465	7.3348e-13	-	0.548978	0.0353275	-	0.12254	1	-	0.229492	1	-	0.993223	0.545058	-	0.206342	1	-	-0.80482	1	-
ENSMUSG00000030064	Frmd4b	3.175	2.561e-37	UP	-0.982211	1	-	0.0356765	1	-	-0.470118	0.015533	-	-0.407693	1	-	0.350205	0.12114	-	0.580786	0.0112553	-	-2.74731	1.20002e-20	DN	-0.582647	0.00514103	-	-0.757981	0.0385069	-	-1.5915	1.5215e-08	-	0.377814	0.679264	-	-0.428652	1	-	0.33084	1	-	-0.80763	0.854136	-	-2.46196	1	-
ENSMUSG00000005973	Rcn1	3.14976	4.01028e-38	UP	0.639	1	-	-1.00577	0.573438	-	-1.69346	2.19898e-21	-	-2.24774	0.129925	-	-2.90563	7.08805e-29	DN	-4.32499	2.16406e-33	DN	1.78484	1.21579e-23	-	-0.218662	0.370208	-	0.102789	0.873123	-	-0.906664	0.00101193	-	0.184618	0.944326	-	0.888355	1	-	-0.00279192	1	-	0.390002	0.795334	-	-1.27181	1	-
ENSMUSG00000001270	Ckb	3.13976	9.26835e-36	UP	1.23519	0.90157	-	-1.08057	0.542489	-	-3.85105	1.35535e-68	DN	-1.73452	0.272383	-	-3.36548	1.57827e-32	DN	-4.04595	2.54393e-28	DN	2.03092	7.3219e-30	UP	-3.05588	2.45754e-40	DN	2.50494	9.90577e-35	UP	-2.29201	3.14878e-15	DN	-2.12509	0.0161948	-	-0.227739	1	-	1.1755	0.347407	-	-1.3115	0.42595	-	-2.17895	1	-
ENSMUSG00000035268	Pkig	3.13136	2.31802e-37	UP	0.990733	1	-	-1.04972	0.533948	-	-0.783909	6.04215e-06	-	-1.19813	0.466169	-	-0.719451	0.00224188	-	-1.24293	6.80516e-06	-	0.209094	0.484114	-	-0.794717	5.00391e-05	-	0.803487	0.00160594	-	-0.045883	1	-	-1.7065	0.0516127	-	-0.635609	1	-	-0.222686	1	-	0.103854	1	-	-0.497633	1	-
ENSMUSG00000049422	Chchd10	3.12703	3.37103e-38	UP	1.0294	1	-	-0.847574	0.690881	-	-0.932556	3.87196e-08	-	-1.52989	0.305397	-	-1.2702	1.29437e-08	-	-3.21938	1.22494e-24	DN	0.253284	0.355886	-	-2.07751	2.61509e-25	DN	0.976024	6.90278e-05	-	1.09609	5.16053e-08	-	-2.26124	0.00516446	DN	-0.237069	1	-	-0.920299	1	-	1.27681	0.0237654	-	-0.311239	1	-
ENSMUSG00000091586	Cyp4f17	3.12329	3.20242e-32	UP	-0.652824	1	-	1.48382	0.0200408	-	-0.9461	2.26337e-06	-	-1.77834	0.305787	-	-1.04845	8.04852e-05	-	-2.6367	5.15727e-13	DN	0.10215	0.829388	-	-0.45134	0.0599499	-	-0.238793	0.765835	-	-0.530427	0.165615	-	1.52998	0.0021797	-	0.597999	1	-	1.28008	0.346886	-	0.690401	0.507788	-	-1.26804	1	-
ENSMUSG00000038816	Ctnnal1	3.10397	1.29828e-33	UP	0.351259	1	-	0.366346	0.798168	-	-0.788652	3.82039e-05	-	-1.85525	0.259305	-	-1.18363	2.98645e-06	-	-2.98462	8.15718e-17	DN	-1.75163	9.03577e-10	-	0.628547	0.000627662	-	0.390055	0.244658	-	-0.101137	1	-	-0.658021	0.740341	-	0.230537	1	-	0.737887	0.796671	-	0.661855	0.508159	-	-0.803777	1	-
ENSMUSG00000024302	Dtna	3.08739	3.77243e-31	UP	-0.868921	1	-	0.973903	0.212978	-	-3.2545	3.67658e-43	DN	-2.49251	0.155014	-	-3.96594	4.58965e-30	DN	-4.16978	5.2307e-22	DN	-1.93309	1.62142e-10	-	-2.51739	1.25889e-24	DN	3.30596	2.13884e-63	UP	0.238652	0.600792	-	-1.31335	0.23797	-	-0.702367	1	-	3.25838	8.94404e-07	UP	0.0997602	1	-	-1.56495	1	-
ENSMUSG00000062202	Btbd9	3.07514	2.32508e-33	UP	-0.350575	1	-	1.05661	0.137048	-	-0.872783	3.89929e-06	-	-0.530171	1	-	-0.600596	0.0198557	-	-0.665613	0.0257783	-	-0.408185	0.200341	-	-0.837127	6.78999e-05	-	0.33565	0.332827	-	0.087171	0.965434	-	0.349245	0.748263	-	-0.651054	1	-	1.22083	0.357122	-	0.803776	0.345055	-	-0.835247	1	-
ENSMUSG00000036438	Calm2	3.04156	1.94832e-36	UP	0.742438	1	-	-0.792265	0.734125	-	-0.425226	0.0184243	-	-1.58411	0.276929	-	-0.888743	5.05603e-05	-	-2.58655	1.13324e-19	DN	-0.430814	0.103681	-	-0.128462	0.667773	-	0.780352	0.00218208	-	-0.1693	0.80067	-	-1.21873	0.184279	-	-0.373489	1	-	-0.45315	1	-	0.45467	0.812197	-	-0.449386	1	-
ENSMUSG00000066720	Cldn9	3.03112	3.8948e-34	UP	-0.00642817	1	-	-0.688879	0.858304	-	-3.46932	3.08781e-64	DN	-2.68258	0.0632986	-	-3.79132	1.331e-40	DN	-3.83964	9.37308e-29	DN	-4.28224	1.19536e-40	DN	-3.62674	1.43254e-54	DN	3.94108	1.44057e-113	UP	0.0370236	1	-	-2.42056	0.00376121	DN	0.365535	1	-	2.40677	0.00144342	UP	0.246518	0.992283	-	-1.62905	1	-
ENSMUSG00000038473	Nos1ap	3.02128	3.89152e-31	UP	-0.452964	1	-	1.19656	0.0738072	-	-0.616588	0.00169535	-	0.425626	0.737108	-	0.0587185	0.95705	-	-0.782396	0.00903547	-	-2.66192	1.16735e-17	DN	-1.78543	5.9615e-16	-	0.850311	0.00169903	-	-0.228779	0.738432	-	0.0862273	1	-	-0.978591	1	-	1.925	0.0435954	-	0.504508	0.710869	-	-1.84085	1	-
ENSMUSG00000069171	Nr2f1	3.01296	2.2418e-33	UP	-0.701304	1	-	-1.23546	0.411706	-	-3.86209	1.61137e-73	DN	-2.51394	0.0846728	-	-4.11411	1.83098e-44	DN	-4.35072	4.94637e-33	DN	0.235629	0.413033	-	-3.89717	2.03048e-59	DN	3.90808	1.93558e-110	UP	-1.49413	3.45407e-08	-	-3.4182	5.75838e-05	DN	-1.2651	1	-	2.23399	0.00507602	UP	-1.14428	0.525963	-	-1.58633	1	-
ENSMUSG00000026675	Hsd17b7	3.00865	2.5146e-32	UP	-0.390373	1	-	-1.31124	0.361769	-	0.457355	0.00826094	-	-2.542	0.0841181	-	-0.677393	0.00474667	-	-2.58982	1.19658e-16	DN	-1.29784	4.89434e-07	-	0.656679	0.000176301	-	-2.02043	5.07075e-09	DN	-1.66581	1.30317e-09	-	0.300498	0.775123	-	-0.997298	1	-	-2.02938	0.867205	-	-1.78343	0.153249	-	-0.706921	1	-
ENSMUSG00000026915	Strbp	2.99696	2.14266e-33	UP	0.048586	1	-	0.540362	0.548901	-	-0.545577	0.00224481	-	-1.92883	0.201676	-	-1.10764	1.90859e-06	-	-2.34121	6.71692e-15	DN	-2.16637	5.32722e-16	DN	-0.17393	0.518101	-	1.227	1.91878e-07	-	-0.263608	0.612043	-	-0.0278652	1	-	-1.09664	1	-	1.83992	0.0412518	-	0.639951	0.468169	-	-1.418	1	-
ENSMUSG00000056091	St3gal5	2.99199	5.81383e-32	UP	-0.281694	1	-	0.263339	0.890726	-	-3.92798	7.01883e-68	DN	-2.53243	0.100578	-	-3.62749	1.26389e-34	DN	-4.20979	2.10207e-28	DN	-0.875592	0.00102891	-	-3.77343	1.31268e-51	DN	3.0938	1.33598e-59	UP	-1.59649	1.40888e-08	-	-3.09889	0.000463856	DN	0.731486	1	-	2.09666	0.0141011	-	3.97015	2.0079e-34	UP	-0.397544	1	-
ENSMUSG00000041362	Shtn1	2.97713	7.64419e-32	UP	0.286381	1	-	0.40059	0.72481	-	0.0192636	1	-	-1.63218	0.292825	-	-0.871048	0.000249394	-	-2.58888	2.74493e-16	DN	-4.38066	4.88201e-38	DN	0.133226	0.63698	-	0.418566	0.172897	-	-0.155833	0.900941	-	-0.206886	1	-	-0.152025	1	-	0.773776	0.687769	-	0.203706	1	-	-0.500504	1	-
ENSMUSG00000021379	Id4	2.94361	4.05488e-32	UP	0.166821	1	-	0.242319	0.891385	-	-1.22663	7.04612e-13	-	-1.57644	0.295413	-	-2.23706	6.82577e-20	DN	-3.40682	1.66672e-25	DN	-1.79875	2.90413e-12	-	-0.449299	0.0256965	-	1.22664	1.69055e-07	-	1.58562	2.65738e-17	-	-0.646789	0.702488	-	-0.373902	1	-	0.356274	1	-	0.0924977	1	-	0.501814	1	-
ENSMUSG00000026879	Gsn	2.93168	1.87555e-32	UP	0.126857	1	-	-1.31238	0.335348	-	-0.238201	0.258421	-	-1.86629	0.202912	-	-0.0183209	1	-	-1.22222	2.83728e-06	-	0.25584	0.344608	-	-0.883272	2.36065e-06	-	0.761515	0.00330454	-	-1.57008	7.63952e-10	-	-1.12867	0.245467	-	0.146216	1	-	1.07698	0.378734	-	-3.04013	0.00231103	DN	-0.873234	1	-
ENSMUSG00000024454	Hdac3	2.92868	1.29914e-31	UP	0.597467	1	-	-0.111998	1	-	-0.843466	8.86122e-07	-	-1.58774	0.292825	-	-0.733387	0.0017652	-	-1.92681	2.69632e-11	-	-0.91427	0.000336845	-	-0.565184	0.00378675	-	1.59329	5.85317e-13	-	-0.0792602	1	-	-0.829754	0.496203	-	0.16168	1	-	0.930748	0.525717	-	0.702698	0.390408	-	-1.28775	1	-
ENSMUSG00000072235	Tuba1a	2.91614	5.06255e-32	UP	0.934196	1	-	-1.05588	0.516123	-	-0.775591	5.08274e-06	-	-1.52391	0.303628	-	-2.20253	2.61661e-20	DN	-3.04999	2.70536e-23	DN	1.07197	2.26202e-08	-	0.00156175	1	-	0.687039	0.00989488	-	-0.781463	0.00341799	-	-1.01884	0.317933	-	-0.300917	1	-	-0.265312	1	-	0.0868338	1	-	-0.0375986	1	-
ENSMUSG00000074637	Sox2	2.89579	8.5182e-30	UP	-0.329903	1	-	-0.87045	0.684033	-	0.141454	0.572146	-	-1.50743	0.32698	-	-0.188086	0.613603	-	-1.36724	1.03518e-06	-	-3.90855	3.00175e-35	DN	0.660262	0.00013555	-	-0.551841	0.152964	-	-0.776487	0.00693242	-	-0.766198	0.566765	-	-1.45887	1	-	-1.20876	1	-	-3.52369	0.00110334	DN	-0.542202	1	-
ENSMUSG00000031441	Atp11a	2.8898	1.80127e-29	UP	-0.30707	1	-	1.28535	0.0365331	-	-0.825826	5.46618e-06	-	-1.58876	0.308556	-	-0.848204	0.000421993	-	-2.56391	1.18079e-15	DN	-0.691991	0.010648	-	-1.01368	4.65479e-07	-	0.810676	0.00188541	-	0.630759	0.00862957	-	0.54159	0.439802	-	0.972951	1	-	1.84183	0.0472961	-	0.612564	0.525772	-	-0.538237	1	-
ENSMUSG00000059970	Hspa2	2.88387	7.66701e-30	UP	0.464019	1	-	-0.593361	0.944508	-	-0.847783	9.96433e-07	-	-1.33334	0.399853	-	-1.61991	1.15236e-11	-	-4.1144	1.58395e-30	DN	-1.73789	2.80848e-11	-	-0.558524	0.00470415	-	2.58963	2.11692e-39	UP	-0.411216	0.269381	-	-1.32152	0.159898	-	-0.45417	1	-	0.714041	0.725601	-	0.0802508	1	-	-0.994987	1	-
ENSMUSG00000038871	Bpgm	2.85938	3.62201e-28	UP	0.633494	1	-	-0.79569	0.779402	-	-1.02568	2.94225e-08	-	-1.52413	0.344745	-	-1.75158	6.27625e-12	-	-3.58829	3.93549e-22	DN	1.161	5.48743e-09	-	-1.12754	4.45118e-08	-	1.76188	3.10878e-15	-	-0.385917	0.344177	-	-1.71649	0.0682535	-	-1.24078	1	-	0.0558744	1	-	-0.260052	1	-	-1.10236	1	-
ENSMUSG00000018395	Kif3a	2.85393	2.07534e-28	UP	0.0324112	1	-	-0.13775	1	-	-0.187209	0.427587	-	-1.61845	0.293241	-	-0.664683	0.00592612	-	-1.9501	5.98199e-11	-	0.122194	0.727423	-	-0.391002	0.074735	-	0.0792778	0.940114	-	-0.0484582	1	-	-0.503824	0.892155	-	-1.18571	1	-	-0.153302	1	-	0.0701686	1	-	-1.63258	1	-
ENSMUSG00000001175	Calm1	2.85124	9.96334e-31	UP	0.566698	1	-	-1.44963	0.244197	-	0.0716716	0.82901	-	-1.65346	0.256601	-	0.0535679	0.987283	-	-1.15086	7.92847e-06	-	-0.545885	0.0304418	-	-0.130081	0.665788	-	-0.65805	0.0455025	-	-0.545338	0.059656	-	-1.60625	0.0562756	-	-0.855064	1	-	-1.42378	1	-	-0.856762	0.761292	-	-0.798761	1	-
ENSMUSG00000017491	Rarb	2.83507	6.65926e-28	UP	0.21182	1	-	0.251313	0.918322	-	-0.972295	1.1535e-07	-	-0.73412	0.871715	-	-0.481133	0.064308	-	-0.401376	0.207954	-	0.76118	0.00034879	-	-2.10283	4.32246e-22	DN	0.581305	0.0430869	-	0.339265	0.294035	-	-1.12388	0.291954	-	-0.737074	1	-	0.701146	0.793507	-	-0.0308356	1	-	-1.18437	1	-
ENSMUSG00000045257	Morn2	2.82968	6.08505e-28	UP	0.919696	1	-	-0.684	0.863567	-	-0.344456	0.098327	-	-1.35869	0.406222	-	-0.365184	0.186429	-	-1.49002	3.98738e-07	-	-0.812232	0.00253172	-	-0.812493	6.91598e-05	-	1.1189	5.04613e-06	-	0.250543	0.509938	-	-1.6605	0.0760856	-	-0.138815	1	-	-1.34123	1	-	0.28589	0.984514	-	-1.1723	1	-
ENSMUSG00000032403	2300009A05Rik	2.81673	3.40273e-27	UP	0.721045	1	-	-0.396121	1	-	-0.369212	0.068132	-	-0.811549	0.801178	-	-0.0827539	0.983098	-	-1.80772	1.15785e-09	-	-0.150312	0.787108	-	-0.829332	3.84781e-05	-	0.3947	0.209371	-	0.252827	0.494534	-	-1.00779	0.357665	-	-0.369924	1	-	-0.551524	1	-	0.205698	1	-	-0.969794	1	-
ENSMUSG00000003452	Bicd1	2.79508	1.4885e-24	UP	-0.157763	1	-	1.70581	0.00326123	-	-2.59592	1.10832e-32	DN	-1.93867	0.254819	-	-3.74511	4.91929e-29	DN	-4.20279	1.21972e-22	DN	-2.12557	2.5771e-12	DN	-1.84617	5.77738e-16	-	2.46291	1.28833e-30	UP	0.651459	0.0115842	-	-0.48874	0.943999	-	-0.412737	1	-	2.98005	2.0599e-05	UP	2.75464	5.67092e-11	UP	-0.597206	1	-
ENSMUSG00000024109	Nrxn1	2.73978	5.08841e-19	UP	-1.24445	1	-	-0.36357	1	-	-1.47243	1.5906e-10	-	-2.50296	0.21704	-	-3.66525	1.95814e-20	DN	-5.18393	7.42431e-19	DN	-2.48054	2.37545e-11	DN	-0.638199	0.0137047	-	3.01287	2.23035e-40	UP	-1.70924	2.51882e-06	-	-0.311485	1	-	-0.126619	1	-	4.30071	1.56301e-13	UP	-3.14061	0.0481902	-	0.426461	1	-
ENSMUSG00000015149	Sirt2	2.7039	6.19085e-26	UP	0.678258	1	-	-0.434725	1	-	-1.13457	2.50399e-11	-	-1.68835	0.260202	-	-1.05438	4.39814e-06	-	-1.65494	3.50467e-09	-	-0.396601	0.179477	-	-1.44253	1.35813e-13	-	2.5805	4.07727e-40	UP	-0.551947	0.078094	-	-1.90072	0.0241211	-	-0.700654	1	-	1.69097	0.0735923	-	0.0613435	1	-	-0.410481	1	-
ENSMUSG00000033088	Triobp	2.70345	3.99144e-25	UP	0.407956	1	-	-0.333609	1	-	-0.762044	2.0185e-05	-	-1.63039	0.288535	-	-1.04668	8.30937e-06	-	-1.6661	6.62505e-09	-	0.392772	0.097913	-	-0.605455	0.00278842	-	1.1687	8.07765e-07	-	0.0546794	1	-	-1.44505	0.119037	-	0.023416	1	-	0.434405	1	-	0.476306	0.689707	-	-1.34317	1	-
ENSMUSG00000037960	Card19	2.70153	1.13906e-25	UP	0.879617	1	-	-0.749167	0.78694	-	-0.154054	0.543421	-	-1.65924	0.268762	-	-0.0202279	1	-	-1.51712	4.97275e-08	-	-0.158236	0.698325	-	-1.17999	1.06183e-09	-	0.314016	0.329895	-	0.402671	0.163232	-	-1.98349	0.0176923	-	-0.658906	1	-	-0.489757	1	-	0.187506	1	-	-0.0228869	1	-
ENSMUSG00000020462	Cfap36	2.69844	6.6406e-25	UP	0.550354	1	-	-0.65701	0.891809	-	-0.898304	7.20657e-07	-	-2.22215	0.153728	-	-1.66888	1.4115e-11	-	-3.49367	5.39374e-23	DN	0.839635	4.98301e-05	-	-0.22227	0.407438	-	0.612344	0.0291523	-	0.483602	0.0688772	-	-0.940583	0.421878	-	0.0469609	1	-	-0.684604	1	-	0.560775	0.603056	-	-0.194832	1	-
ENSMUSG00000026888	Grb14	2.69271	8.36131e-24	UP	0.239444	1	-	-0.309342	1	-	-2.8197	1.92587e-40	DN	-3.51425	0.0247052	-	-3.83776	3.33293e-33	DN	-4.28331	8.18753e-26	DN	0.634771	0.00464136	-	-2.19204	1.27254e-22	DN	3.3273	2.88226e-69	UP	-0.684126	0.0318112	-	-2.49209	0.00696054	DN	-1.1379	1	-	2.48821	0.00129198	UP	-1.03347	0.648565	-	-0.41413	1	-
ENSMUSG00000022257	Laptm4b	2.68685	2.90329e-25	UP	-0.700387	1	-	-0.22505	1	-	-0.545824	0.00335413	-	-1.0472	0.574147	-	-0.259263	0.400401	-	-1.02494	0.000229902	-	0.245257	0.365212	-	-0.980204	7.54524e-07	-	0.161309	0.715676	-	0.408338	0.148088	-	0.133529	1	-	0.4501	1	-	0.109427	1	-	0.193295	1	-	-1.00016	1	-
ENSMUSG00000057230	Aak1	2.68136	7.73755e-24	UP	-1.13768	1	-	0.920697	0.214062	-	-0.717878	0.000136108	-	-1.09804	0.566065	-	-0.917949	0.000194531	-	-2.12843	1.88914e-11	DN	0.692171	0.00157804	-	-0.681958	0.00114504	-	0.339825	0.316572	-	0.0654423	1	-	0.467366	0.56579	-	-0.120021	1	-	0.764973	0.742212	-	0.307847	0.956035	-	-1.98398	1	-
ENSMUSG00000036309	Skp1a	2.66501	9.11484e-26	UP	0.405591	1	-	-1.53562	0.207617	-	-0.997492	2.44289e-09	-	-1.1709	0.464147	-	-0.802114	0.000267691	-	-0.997589	9.98224e-05	-	-1.43576	2.31922e-09	-	-1.08111	5.35099e-09	-	2.58404	1.63802e-41	UP	-0.293894	0.464222	-	-2.29693	0.00344278	DN	-1.03019	1	-	0.088048	1	-	0.249029	1	-	-1.51116	1	-
ENSMUSG00000021290	Atp5mpl	2.63916	3.6809e-25	UP	1.13088	1	-	-1.08273	0.487982	-	-0.102405	0.741195	-	-0.973356	0.606493	-	-0.394476	0.0992835	-	-1.64852	5.42442e-10	-	-0.272184	0.365888	-	-0.0755216	0.872791	-	-0.0349831	1	-	-0.0293152	1	-	-1.63672	0.0512364	-	-0.223363	1	-	-1.26853	1	-	-0.512123	1	-	-0.55878	1	-
ENSMUSG00000028328	Tmod1	2.63584	1.43124e-23	UP	-0.492702	1	-	-0.317541	1	-	-3.83159	8.31648e-71	DN	-2.23434	0.142047	-	-3.20929	9.41958e-32	DN	-3.66129	3.04694e-26	DN	-3.15035	1.06014e-26	DN	-3.86379	3.83288e-57	DN	4.5075	3.22132e-158	UP	-2.34293	2.47989e-16	DN	-2.57767	0.00234432	DN	-1.44591	1	-	3.37469	1.44268e-08	UP	-0.113917	1	-	-1.30738	1	-
ENSMUSG00000090086	AI480526	2.58598	1.95245e-18	UP	-1.10252	1	-	2.14506	8.06467e-05	UP	-1.55178	7.39097e-13	-	0.895032	0.36589	-	-1.31403	3.69618e-06	-	-0.684466	0.0412898	-	-1.22451	7.6347e-05	-	-1.48898	6.08975e-10	-	1.42754	3.88414e-08	-	0.130603	0.893858	-	0.286853	0.894982	-	-0.934674	1	-	3.09981	1.63919e-05	UP	1.27157	0.0735393	-	0.790605	1	-
ENSMUSG00000037664	Cdkn1c	2.5763	3.5682e-20	UP	1.07317	1	-	-0.994408	0.642475	-	-1.47768	4.46491e-15	-	0.295298	0.872699	-	-1.4945	2.71713e-09	-	-0.607065	0.0448196	-	1.52068	6.11314e-15	-	-1.83461	1.22649e-17	-	1.71779	1.27219e-13	-	-0.653419	0.0443982	-	-3.02969	0.000874342	DN	-1.67436	1	-	0.271793	1	-	-2.22435	0.0754191	-	0.466159	1	-
ENSMUSG00000025932	Eya1	2.54668	7.67897e-19	UP	-0.360875	1	-	0.814339	0.351861	-	-2.3378	1.58287e-26	DN	-2.47451	0.161809	-	-2.50009	8.22169e-17	DN	-3.00519	4.81825e-15	DN	-1.64267	4.4614e-08	-	-2.13751	8.11123e-19	DN	3.44917	6.04737e-68	UP	-0.62871	0.077723	-	-0.297371	1	-	-1.42235	1	-	3.94098	4.02923e-12	UP	-1.38397	0.443258	-	0.30263	1	-
ENSMUSG00000002625	Akap8l	2.54308	1.41744e-21	UP	-0.749105	1	-	1.21497	0.0542502	-	-1.00432	2.38392e-08	-	-0.974475	0.642915	-	-0.707286	0.00347042	-	-1.94073	9.70131e-11	-	0.413179	0.0827882	-	-1.0503	1.54864e-07	-	0.941196	0.000180472	-	-0.0102301	1	-	-0.00654262	1	-	-1.15121	1	-	1.61236	0.110423	-	1.6415	0.0015647	-	-1.01284	1	-
ENSMUSG00000028080	Lrba	2.53915	5.38551e-21	UP	-0.66757	1	-	0.582425	0.537926	-	-0.181602	0.488796	-	-0.448444	1	-	-0.26377	0.404317	-	-1.70837	1.31166e-08	-	-1.10004	3.80598e-05	-	-0.658828	0.00153994	-	0.680507	0.0136634	-	0.377927	0.21211	-	-0.229579	1	-	0.254528	1	-	1.07616	0.449877	-	0.262643	1	-	0.127971	1	-
ENSMUSG00000040407	Akap9	2.53797	2.20593e-22	UP	-0.655015	1	-	0.505718	0.573511	-	-0.224678	0.294936	-	-1.67152	0.257123	-	-0.372714	0.12823	-	-2.31161	1.82176e-15	DN	-0.75793	0.00196535	-	-0.210573	0.385425	-	0.335498	0.318142	-	0.168002	0.754552	-	0.493889	0.465517	-	-0.0488059	1	-	0.839074	0.586402	-	0.312643	0.888145	-	-0.948092	1	-
ENSMUSG00000029053	Prkcz	2.52312	7.54818e-21	UP	0.480491	1	-	0.395402	0.744963	-	-0.0365155	1	-	-0.900337	0.707343	-	-0.238742	0.471194	-	-1.70706	1.18795e-08	-	-2.64338	5.3322e-19	DN	-0.517973	0.0152934	-	0.856423	0.00100746	-	0.356286	0.257885	-	-0.276828	1	-	-0.966018	1	-	0.691103	0.803984	-	0.308682	0.9384	-	0.173249	1	-
ENSMUSG00000030035	Wbp1	2.49281	7.37719e-21	UP	0.321293	1	-	-0.528766	1	-	-0.165241	0.49861	-	-1.60634	0.28377	-	-0.198774	0.568242	-	-1.85993	7.82899e-11	-	-0.421109	0.145809	-	-0.402357	0.0502536	-	0.677111	0.00988192	-	0.202838	0.61416	-	-1.20585	0.209241	-	-0.984823	1	-	-0.113246	1	-	0.0550529	1	-	-1.7215	1	-
ENSMUSG00000025078	Nhlrc2	2.46868	3.53998e-20	UP	-0.952272	1	-	0.574542	0.533819	-	-0.316132	0.132005	-	-0.678458	0.927311	-	-0.214697	0.535596	-	-0.489727	0.0997117	-	-0.526047	0.0632879	-	-0.425228	0.050022	-	-0.0455977	1	-	-0.139399	0.945434	-	-0.173449	1	-	-0.714728	1	-	0.499336	0.963439	-	1.62861	0.0017108	-	-2.38491	1	-
ENSMUSG00000101609	Kcnq1ot1	2.46814	4.4603e-20	UP	-1.10872	1	-	2.25128	1.05879e-06	UP	-2.12966	7.10156e-31	DN	-3.23906	0.0174993	-	-3.07582	3.80891e-31	DN	-4.70562	4.62964e-37	DN	0.784288	0.000161393	-	-0.218195	0.375102	-	0.709338	0.0087989	-	0.282166	0.432595	-	1.10182	0.0329125	-	-1.78976	1	-	2.76463	5.32194e-05	UP	1.07001	0.0936027	-	-2.97335	1	-
ENSMUSG00000018796	Acsl1	2.45849	2.26975e-19	UP	-0.728474	1	-	0.281733	0.876453	-	-0.336189	0.113188	-	-1.17779	0.500984	-	0.823047	2.68982e-05	-	-0.338115	0.320792	-	-1.47974	4.96011e-08	-	-1.40027	1.63612e-11	-	0.556708	0.057914	-	-0.186264	0.829566	-	0.076231	1	-	-0.878837	1	-	0.823814	0.687789	-	0.00546088	1	-	-2.06324	1	-
ENSMUSG00000049086	Bmyc	2.44357	1.31679e-19	UP	0.972625	1	-	-0.27087	1	-	-0.638097	0.000530269	-	-1.98259	0.202524	-	-1.93814	9.8492e-15	-	-4.04779	2.29969e-27	DN	0.389273	0.107338	-	-0.251738	0.320492	-	1.19828	4.89024e-07	-	0.528498	0.0375755	-	-1.13596	0.270006	-	0.112712	1	-	-0.402937	1	-	0.661855	0.462555	-	-1.55909	1	-
ENSMUSG00000070858	Gm1673	2.44092	1.1521e-18	UP	0.890357	1	-	-0.967352	0.640544	-	-1.36221	2.99743e-13	-	-1.36888	0.410518	-	-3.65086	8.33621e-33	DN	-3.41742	2.88327e-21	DN	1.28946	4.93342e-11	-	0.405448	0.037708	-	1.23836	3.44077e-07	-	-0.638025	0.0476352	-	-0.402388	1	-	-0.134436	1	-	-0.237226	1	-	-0.787912	0.878859	-	0.852462	1	-
ENSMUSG00000036528	Ppfibp2	2.44071	3.87488e-19	UP	-0.878068	1	-	-0.261436	1	-	-0.393983	0.0512829	-	-0.318759	1	-	1.45567	5.8876e-16	-	-0.185851	0.712145	-	-0.98029	0.000236834	-	-2.57015	5.05303e-30	DN	-0.284158	0.622192	-	-0.879941	0.00257408	-	-1.52502	0.107458	-	-1.86481	1	-	-0.0154301	1	-	1.78637	0.00039317	-	-0.725542	1	-
ENSMUSG00000021643	Serf1	2.43419	1.18765e-19	UP	0.969944	1	-	-0.749594	0.786847	-	0.134057	0.589099	-	-1.25702	0.427912	-	-0.506329	0.0312125	-	-2.39606	8.6036e-16	DN	-0.0350638	1	-	0.120838	0.669986	-	-0.228291	0.738408	-	-0.295154	0.477415	-	-1.20503	0.210177	-	-0.683332	1	-	-1.26198	1	-	-0.579003	1	-	-0.092342	1	-
ENSMUSG00000074024	4632427E13Rik	2.42454	1.82682e-19	UP	-1.6419	1	-	1.87741	0.000194236	-	-1.29298	2.46698e-13	-	-0.00294342	1	-	-1.18573	3.93898e-07	-	-0.995202	0.000292387	-	-0.0381437	1	-	-0.742526	0.000170539	-	0.998773	5.14673e-05	-	-0.0499727	1	-	0.916332	0.097577	-	-1.3461	1	-	2.09788	0.0110041	-	1.66193	0.000996487	-	-3.20821	1	-
ENSMUSG00000031626	Sorbs2	2.42422	3.36402e-19	UP	-1.02757	1	-	1.21726	0.0482802	-	-0.541271	0.00260875	-	-2.13931	0.156567	-	-1.22616	1.74e-07	-	-2.94266	3.30527e-20	DN	-2.05097	1.49103e-14	DN	-1.04339	1.05843e-07	-	1.78292	2.20235e-16	-	0.488209	0.065553	-	0.436181	0.560259	-	-0.988059	1	-	2.60691	0.000251915	UP	1.01156	0.126703	-	-0.434429	1	-
ENSMUSG00000060261	Gtf2i	2.40242	5.2306e-19	UP	-0.0887539	1	-	0.267931	0.870662	-	-0.941693	3.84838e-08	-	-1.87527	0.210028	-	-1.96076	6.75811e-16	-	-3.65443	1.0006e-26	DN	0.28743	0.280228	-	-0.289213	0.193351	-	1.45353	1.36737e-10	-	0.503122	0.052498	-	-0.556637	0.810687	-	-0.189134	1	-	1.19384	0.314212	-	1.00725	0.123554	-	-0.414585	1	-
ENSMUSG00000027999	Pla2g12a	2.39713	1.58272e-18	UP	0.584179	1	-	-0.725988	0.830642	-	-0.89448	8.6768e-07	-	-1.25866	0.445544	-	-2.204	2.00736e-17	DN	-3.88038	2.71885e-25	DN	0.360951	0.146797	-	-0.565279	0.00685766	-	1.77185	7.48453e-16	-	0.630873	0.00879347	-	-0.56518	0.818837	-	0.436345	1	-	-0.331617	1	-	0.164614	1	-	-0.335254	1	-
ENSMUSG00000029657	Hsph1	2.39671	9.51652e-19	UP	0.267011	1	-	-0.212133	1	-	-0.413258	0.0353932	-	-1.20095	0.475413	-	-1.43978	2.60219e-09	-	-1.09807	9.66516e-05	-	0.0792999	0.865823	-	0.506081	0.00623469	-	-0.0431199	1	-	-0.0277008	1	-	-0.390533	1	-	-1.0541	1	-	-0.419026	1	-	-0.0480752	1	-	-1.50108	1	-
ENSMUSG00000073633	Fbxo36	2.38331	2.67222e-18	UP	0.0507659	1	-	-1.14034	0.492818	-	0.133861	0.614317	-	-1.55375	0.319254	-	0.593458	0.0036019	-	-0.446541	0.143903	-	-1.3032	8.36141e-07	-	-0.63778	0.00199081	-	-0.0177573	1	-	-0.110452	1	-	-1.00235	0.367512	-	-1.43093	1	-	-1.00097	1	-	-1.53084	0.276072	-	-0.70707	1	-
ENSMUSG00000026239	Pde6d	2.38095	2.7113e-18	UP	0.575741	1	-	-0.86535	0.690056	-	-0.308139	0.148945	-	-1.35784	0.395172	-	-0.428465	0.102867	-	-2.08285	1.17896e-11	DN	0.404715	0.0928851	-	-0.400941	0.0695974	-	0.95529	0.000144815	-	-0.250862	0.656338	-	-1.42621	0.135149	-	-0.639109	1	-	-0.475231	1	-	0.235812	1	-	-1.30904	1	-
ENSMUSG00000022332	Khdrbs3	2.38011	1.26347e-14	UP	0.329797	1	-	0.202051	1	-	-3.14789	2.07806e-35	DN	-1.20321	0.599545	-	-3.4842	2.0571e-22	DN	-4.03709	3.68851e-18	DN	1.29463	3.58154e-09	-	-2.53027	1.87421e-21	DN	0.362019	0.353559	-	0.415027	0.230691	-	-1.76967	0.118022	-	0.655845	1	-	-0.376237	1	-	4.6715	2.34969e-47	UP	1.30788	1	-
ENSMUSG00000054814	Usp46	2.36341	2.35103e-18	UP	0.198211	1	-	-0.279144	1	-	0.0289943	1	-	-1.85043	0.219054	-	-0.230038	0.482221	-	-2.03239	1.06144e-11	DN	-0.0934508	0.952478	-	-0.0847566	0.878019	-	-0.716758	0.047746	-	0.227569	0.564348	-	-0.259616	1	-	-0.799477	1	-	-0.182797	1	-	-0.281198	1	-	-1.66194	1	-
ENSMUSG00000023169	Slc38a1	2.34002	1.03906e-16	UP	-0.613924	1	-	0.989049	0.17322	-	-1.63176	3.65177e-17	-	-3.24115	0.045318	-	-3.11782	2.78086e-25	DN	-4.91992	1.45816e-27	DN	-0.544205	0.0652524	-	-0.519803	0.018362	-	1.66592	3.49809e-13	-	1.17709	2.22251e-08	-	0.715703	0.27829	-	0.307872	1	-	2.37156	0.00324647	UP	1.44945	0.0117657	-	0.596936	1	-
ENSMUSG00000026585	Kifap3	2.30778	3.21148e-17	UP	0.175591	1	-	-0.447796	1	-	-0.334694	0.0935576	-	-2.73783	0.0638358	-	-1.05579	8.09156e-06	-	-3.51214	6.69978e-24	DN	0.760005	0.000264231	-	0.0127037	1	-	0.378603	0.228234	-	-0.0466713	1	-	-0.249274	1	-	-0.499278	1	-	-0.148301	1	-	0.19898	1	-	-1.09896	1	-
ENSMUSG00000042599	Kdm7a	2.28254	1.02351e-16	UP	-0.502948	1	-	0.30508	0.838286	-	-0.190155	0.418721	-	-0.874186	0.724161	-	0.130361	0.677073	-	-0.638293	0.0249019	-	0.0640313	0.909485	-	-0.68854	0.000641137	-	0.204722	0.604014	-	-0.414243	0.273346	-	-0.164844	1	-	-0.584491	1	-	1.0086	0.476974	-	-0.212189	1	-	0.384553	1	-
ENSMUSG00000000093	Tbx2	2.2762	9.48246e-16	UP	0.453974	1	-	0.3477	0.810663	-	-1.98865	2.10612e-24	-	-1.03839	0.615754	-	-1.73255	1.20479e-11	-	-2.46672	5.08054e-14	DN	0.0610774	0.933504	-	-1.61893	2.42237e-14	-	2.97232	5.77856e-53	UP	-0.477242	0.193308	-	-1.33979	0.185517	-	-0.142453	1	-	2.97228	1.06229e-05	UP	0.475715	0.72635	-	-1.17594	1	-
ENSMUSG00000022972	Cfap298	2.26566	2.73181e-16	UP	0.381217	1	-	-0.85017	0.710508	-	-0.0291066	1	-	-1.79743	0.247062	-	-0.477527	0.061836	-	-2.02749	1.98873e-11	DN	-1.12868	1.59442e-05	-	0.237348	0.296806	-	0.680318	0.0122431	-	0.167643	0.740124	-	-1.43652	0.128021	-	-0.349921	1	-	-0.308148	1	-	0.130081	1	-	-1.5351	1	-
ENSMUSG00000031347	Cetn2	2.25755	2.03057e-16	UP	0.470704	1	-	-1.04348	0.531479	-	-0.00301204	1	-	-1.0088	0.586531	-	0.00191639	1	-	-0.674705	0.0138675	-	-0.573964	0.0312007	-	-0.197209	0.432131	-	0.289382	0.37893	-	-0.171224	0.847069	-	-1.59647	0.0667602	-	-0.426382	1	-	-1.19483	1	-	-0.171376	1	-	-0.803628	1	-
ENSMUSG00000037971	1110032A03Rik	2.25392	2.36706e-16	UP	0.319636	1	-	-0.717969	0.822436	-	-0.403553	0.039689	-	-0.0296855	1	-	0.392261	0.0698311	-	0.875114	4.40165e-05	-	-0.567268	0.0393304	-	-1.49088	1.46823e-13	-	0.369509	0.246414	-	-0.298391	0.524513	-	-1.84488	0.0364715	-	-2.13212	1	-	-0.157782	1	-	0.0664446	1	-	-0.992853	1	-
ENSMUSG00000028484	Psip1	2.25388	2.15951e-16	UP	0.62855	1	-	-0.189035	1	-	-0.900106	3.81873e-07	-	-1.30342	0.411983	-	-1.41024	2.715e-09	-	-1.88105	1.20893e-10	-	0.465566	0.041102	-	0.200792	0.389509	-	0.979916	6.63626e-05	-	0.0120733	1	-	-0.527352	0.856928	-	-0.441559	1	-	0.117241	1	-	0.840419	0.259395	-	0.318514	1	-
ENSMUSG00000021552	Gkap1	2.25167	1.04364e-15	UP	0.710023	1	-	-0.153263	1	-	-0.552849	0.0036701	-	-1.39062	0.390899	-	-1.55479	3.14674e-10	-	-3.19049	2.6786e-20	DN	0.188988	0.525054	-	-0.222123	0.410855	-	1.20255	6.10427e-07	-	0.231408	0.564936	-	-0.724057	0.634826	-	-0.43427	1	-	0.416055	1	-	1.54226	0.00419664	-	-0.144319	1	-
ENSMUSG00000022451	Twf1	2.25039	1.36245e-16	UP	0.299545	1	-	-1.0752	0.496641	-	-0.295799	0.134356	-	-1.71985	0.239419	-	-0.457741	0.0516467	-	-1.08236	5.1681e-05	-	-0.625279	0.012475	-	-0.207574	0.395862	-	1.35579	2.33883e-09	-	-0.135382	0.900001	-	-0.954867	0.366827	-	-0.73073	1	-	0.380058	1	-	-0.449628	1	-	-0.794463	1	-
ENSMUSG00000030688	Stard10	2.24564	9.41773e-17	UP	0.267796	1	-	-1.23578	0.377023	-	-0.186069	0.413099	-	1.02521	0.195813	-	0.252119	0.296137	-	1.23418	7.38085e-10	-	-1.91246	3.16477e-14	-	-0.88218	2.04925e-06	-	-0.395916	0.295154	-	-0.44768	0.156811	-	-1.50179	0.0814685	-	-1.37564	1	-	-1.63404	1	-	-0.226975	1	-	-0.651799	1	-
ENSMUSG00000064302	Clasp1	2.24451	1.10566e-15	UP	-0.612148	1	-	0.829002	0.271649	-	-0.492029	0.0110222	-	-0.562424	1	-	-0.504447	0.0487944	-	-0.663855	0.0220581	-	-0.0517193	1	-	-0.31527	0.185349	-	0.482798	0.108561	-	-0.188955	0.821503	-	0.637334	0.338723	-	-1.08575	1	-	1.09938	0.424449	-	-0.00872805	1	-	-0.684208	1	-
ENSMUSG00000049659	Aftph	2.23806	3.22079e-16	UP	-0.665504	1	-	-0.0168604	1	-	-0.0376628	1	-	-1.1253	0.512986	-	0.229032	0.352782	-	-0.637678	0.0233477	-	-1.23852	1.42095e-06	-	-0.353194	0.112724	-	0.161484	0.715676	-	-0.0174876	1	-	-0.189042	1	-	-1.88667	1	-	0.29968	1	-	0.249022	1	-	-2.74822	1	-
ENSMUSG00000083282	Ctsf	2.21878	4.12291e-15	UP	-0.236724	1	-	0.455917	0.674824	-	-2.02537	9.52412e-26	DN	-1.83183	0.246266	-	-2.83645	2.96766e-24	DN	-3.60726	8.66795e-23	DN	1.6205	3.2603e-18	-	-1.36672	3.48522e-11	-	1.49603	8.98508e-11	-	0.361554	0.244518	-	0.216225	0.92113	-	1.50107	1	-	2.35532	0.00287768	UP	0.795549	0.332572	-	-1.22817	1	-
ENSMUSG00000026575	Nme7	2.21595	2.20103e-14	UP	0.266501	1	-	1.35371	0.0314924	-	-0.614944	0.00154652	-	-1.41595	0.404666	-	-0.444229	0.105129	-	-1.32293	9.76622e-06	-	-1.27694	3.45663e-06	-	-0.78498	0.000203086	-	0.388337	0.244064	-	0.320004	0.345441	-	1.73117	0.00011638	-	1.23767	1	-	2.29733	0.00568199	UP	-0.279185	1	-	0.431364	1	-
ENSMUSG00000091337	Eid1	2.20698	9.34111e-16	UP	0.599329	1	-	-0.778972	0.755429	-	-0.632555	0.00026268	-	-1.42872	0.339434	-	-1.0851	1.81247e-06	-	-2.73491	1.8021e-19	DN	1.06503	3.3399e-08	-	-0.442701	0.0270075	-	1.24251	8.61962e-08	-	-0.0940545	1	-	-1.91457	0.0208433	-	-0.01549	1	-	-1.13025	1	-	-0.00335488	1	-	-0.463829	1	-
ENSMUSG00000037966	Ninj1	2.20523	2.63493e-15	UP	0.628133	1	-	-0.64296	0.892754	-	-0.872687	4.21596e-07	-	-2.38445	0.104861	-	-1.90255	3.88565e-15	-	-3.54706	1.04791e-25	DN	0.892221	1.04407e-05	-	-0.305819	0.165064	-	1.38672	1.65417e-09	-	0.407816	0.159653	-	-1.03301	0.324291	-	0.194125	1	-	-0.14927	1	-	0.395572	0.795602	-	-0.386005	1	-
ENSMUSG00000027848	Olfml3	2.20177	4.64462e-14	UP	-0.413607	1	-	-1.45537	0.338278	-	-4.27992	6.23572e-69	DN	-2.36288	0.151506	-	-3.70283	9.23823e-33	DN	-5.30756	3.34815e-32	DN	4.82037	2.50117e-206	UP	-4.57229	1.70098e-58	DN	-2.62799	1.20523e-11	DN	-3.1034	2.99759e-21	DN	-2.70628	0.00349788	DN	1.07674	1	-	-2.02065	0.95472	-	-4.41738	0.000442738	DN	-0.850308	1	-
ENSMUSG00000019039	Dalrd3	2.19313	3.51543e-15	UP	0.0473771	1	-	0.940848	0.177833	-	-0.368325	0.0566468	-	-0.274912	1	-	-0.196411	0.591071	-	-1.00941	0.000313041	-	-0.617946	0.0236404	-	-0.387218	0.0789626	-	0.446401	0.140073	-	0.0912816	0.950612	-	0.22522	0.900706	-	-0.209898	1	-	1.40054	0.203471	-	0.258897	0.989031	-	-0.657904	1	-
ENSMUSG00000030850	Ate1	2.17576	7.78303e-15	UP	0.0626687	1	-	0.966651	0.161335	-	-0.379356	0.0575969	-	-0.790049	0.807644	-	-0.0154511	1	-	-1.02834	0.000248573	-	-0.183909	0.676877	-	-0.611979	0.00280273	-	0.278644	0.424903	-	-0.0941011	1	-	0.517091	0.47204	-	-2.19742	1	-	1.24842	0.301386	-	0.743491	0.366256	-	-0.642821	1	-
ENSMUSG00000025757	Hspa4l	2.16797	1.20939e-14	UP	-0.175116	1	-	0.484966	0.610442	-	-0.322223	0.103112	-	-1.6219	0.282025	-	-1.38323	3.50119e-09	-	-3.05923	2.23131e-21	DN	-1.68564	7.29558e-11	-	1.03892	9.87746e-11	-	-1.15128	0.000552357	-	0.601178	0.013647	-	0.277901	0.800536	-	-0.42991	1	-	-0.72304	1	-	0.967503	0.152079	-	-0.87759	1	-
ENSMUSG00000025245	Lztfl1	2.1514	1.00292e-14	UP	-0.535937	1	-	0.437912	0.67798	-	-0.5137	0.0058946	-	-1.28041	0.423243	-	-0.280073	0.339527	-	-0.778622	0.00514442	-	0.175068	0.557208	-	-0.378621	0.08449	-	0.762489	0.00334139	-	-0.365652	0.357458	-	0.227557	0.895167	-	-1.49615	1	-	1.35913	0.219252	-	0.186434	1	-	-0.679099	1	-
ENSMUSG00000015165	Hnrnpl	2.13894	9.24973e-15	UP	0.0466094	1	-	0.519501	0.559427	-	-0.430146	0.0179792	-	-0.520734	1	-	-0.295	0.25637	-	-0.372506	0.219127	-	-0.537859	0.0348067	-	-0.181234	0.480408	-	0.848516	0.000767673	-	-0.504892	0.0941936	-	0.104685	1	-	-1.12482	1	-	1.26524	0.256402	-	0.235003	1	-	-0.373006	1	-
ENSMUSG00000040785	Ttc3	2.12785	1.28366e-14	UP	-0.331716	1	-	0.468283	0.615343	-	-0.558413	0.00137187	-	-2.05031	0.156238	-	-1.03605	2.63735e-06	-	-2.50894	1.70315e-17	DN	0.427276	0.0655844	-	-0.296303	0.171332	-	0.733179	0.00502028	-	0.585977	0.0140483	-	-0.0307181	1	-	-0.0997495	1	-	0.769974	0.651433	-	0.546583	0.570987	-	-1.04134	1	-
ENSMUSG00000030701	Plekhb1	2.1253	4.67574e-14	UP	0.465472	1	-	-0.223741	1	-	-3.39721	1.54646e-61	DN	-1.72482	0.25735	-	-3.57892	3.35576e-37	DN	-3.94777	3.71583e-29	DN	-3.11688	8.91493e-27	DN	-3.02486	5.18108e-42	DN	3.90183	2.69902e-111	UP	0.0459598	1	-	-2.56367	0.0021797	DN	0.221056	1	-	2.22208	0.00535032	UP	2.81154	3.0881e-13	UP	-1.02196	1	-
ENSMUSG00000052727	Map1b	2.11583	1.19704e-13	UP	-0.529248	1	-	-0.476797	1	-	-3.72867	3.99735e-72	DN	-2.53344	0.0828194	-	-3.46481	5.90859e-37	DN	-4.40968	5.98871e-35	DN	-0.509845	0.056224	-	-2.46416	1.50544e-31	DN	4.17199	3.964e-129	UP	-0.673488	0.0184511	-	-1.98883	0.0204747	-	-0.636162	1	-	2.91558	1.12035e-05	UP	-0.140206	1	-	-0.983981	1	-
ENSMUSG00000021728	Emb	2.1152	6.95471e-14	UP	-0.210492	1	-	0.559344	0.535786	-	-0.496014	0.00903579	-	-2.67098	0.0734055	-	-1.6203	2.74131e-11	-	-3.84344	1.95785e-26	DN	-0.272734	0.436826	-	-0.799055	6.58342e-05	-	-2.39742	2.59712e-11	DN	1.87392	4.9862e-24	-	0.858553	0.136359	-	0.291961	1	-	-1.91277	0.941379	-	2.15758	1.44088e-06	UP	-1.15782	1	-
ENSMUSG00000033161	Atp1a1	2.11182	1.76964e-14	UP	-0.341617	1	-	0.705606	0.347125	-	-0.909173	5.96194e-08	-	-2.52448	0.0648255	-	-1.62077	4.93919e-13	-	-3.95875	8.56555e-34	DN	-1.20053	5.19066e-07	-	-0.477311	0.0145942	-	1.48733	1.46042e-11	-	1.10167	2.88249e-08	-	0.968206	0.084807	-	1.71802	1	-	2.15655	0.00591543	UP	0.605397	0.485078	-	-0.413219	1	-
ENSMUSG00000031781	Ciapin1	2.11102	1.09516e-13	UP	0.377384	1	-	-0.131449	1	-	0.0934661	0.7759	-	-0.549081	1	-	-0.122032	0.853486	-	-1.55166	9.47319e-08	-	-0.427764	0.155643	-	0.393667	0.0440717	-	-0.496813	0.227967	-	-0.491161	0.15854	-	-0.601373	0.776156	-	-1.09191	1	-	-0.799242	1	-	-0.537179	1	-	-0.215995	1	-
ENSMUSG00000029433	Diablo	2.10782	6.41607e-14	UP	-0.26461	1	-	-0.0990743	1	-	-0.0998695	0.768811	-	-1.47514	0.338286	-	-0.611743	0.0120408	-	-2.16447	1.11343e-12	DN	-0.175415	0.700562	-	0.107086	0.71183	-	0.433933	0.154186	-	0.0651483	1	-	0.0412135	1	-	-0.881701	1	-	-0.395161	1	-	0.526428	0.639185	-	-0.228483	1	-
ENSMUSG00000025791	Pgm1	2.10737	7.9657e-14	UP	0.669097	1	-	-0.302833	1	-	-0.232953	0.294151	-	-1.73584	0.263506	-	-0.706515	0.00333743	-	-2.48377	2.43295e-15	DN	0.346176	0.163562	-	-0.442422	0.0387259	-	0.42052	0.170857	-	0.73711	0.00115643	-	-0.796127	0.543463	-	0.267108	1	-	-0.458983	1	-	-0.378493	1	-	-0.0992455	1	-
ENSMUSG00000026576	Atp1b1	2.10407	1.80907e-14	UP	-0.961263	1	-	-0.424337	1	-	0.0645643	0.859403	-	-0.897759	0.673344	-	0.319155	0.152529	-	-0.314479	0.278744	-	-3.75281	3.11025e-40	DN	-1.39523	7.10981e-14	-	0.708082	0.00660021	-	0.768287	0.000377041	-	-0.10766	1	-	0.0246767	1	-	0.394641	0.991295	-	-0.576287	1	-	-1.27602	1	-
ENSMUSG00000069601	Ank3	2.10111	8.38742e-14	UP	-0.401118	1	-	1.17167	0.0633439	-	-1.03445	5.82608e-09	-	-2.51443	0.0910726	-	-2.19549	3.02435e-18	DN	-4.456	1.04232e-31	DN	0.0295644	1	-	0.206528	0.371352	-	1.1009	4.77164e-06	-	0.571227	0.0193899	-	0.609473	0.34914	-	-0.0447333	1	-	1.85558	0.0412518	-	0.799053	0.306699	-	-0.58621	1	-
ENSMUSG00000022048	Dpysl2	2.09355	3.50292e-13	UP	0.366038	1	-	-1.23776	0.435502	-	-2.36103	1.74691e-32	DN	-2.14594	0.174087	-	-3.19625	3.66064e-28	DN	-3.88399	1.42726e-24	DN	1.02815	3.66986e-07	-	-1.20394	4.41606e-09	-	3.16887	3.45652e-61	UP	-0.755483	0.0128914	-	-1.59142	0.0957913	-	-0.771944	1	-	1.32957	0.264034	-	0.369845	0.863358	-	-1.21921	1	-
ENSMUSG00000022358	Fbxo32	2.09166	8.54871e-14	UP	-0.468981	1	-	-0.475151	1	-	-1.33901	4.23854e-15	-	0.856812	0.292761	-	-0.386019	0.115267	-	2.02607	4.32434e-27	UP	-1.42918	1.26385e-08	-	-1.27726	1.40557e-11	-	1.11803	2.7484e-06	-	-1.03693	0.000108314	-	-0.897236	0.427035	-	-1.24533	1	-	1.519	0.131585	-	-0.562255	1	-	-0.93688	1	-
ENSMUSG00000036430	Tbcc	2.08847	1.46421e-13	UP	0.577848	1	-	-0.26717	1	-	-0.15174	0.565818	-	-0.582838	1	-	0.0784245	0.869075	-	-0.274187	0.444804	-	-0.489583	0.0875142	-	-0.17667	0.545093	-	-0.0565942	1	-	-0.0620761	1	-	-1.306	0.173493	-	-0.662588	1	-	-0.468895	1	-	-0.0523628	1	-	0.306472	1	-
ENSMUSG00000015749	Anp32e	2.08312	1.61807e-13	UP	0.440517	1	-	-0.865957	0.69113	-	-0.374569	0.0539253	-	-1.83465	0.22539	-	-1.28087	6.66999e-08	-	-3.54039	1.32076e-24	DN	-0.290025	0.38811	-	0.771454	5.56755e-06	-	0.849116	0.000873367	-	-0.116565	0.991045	-	-0.9537	0.392924	-	0.203437	1	-	-0.267028	1	-	0.370914	0.835546	-	-1.32415	1	-
ENSMUSG00000047844	Bex4	2.07865	1.68273e-12	UP	0.738525	1	-	-0.336035	1	-	-2.8312	4.38332e-39	DN	-1.07727	0.581991	-	-3.2403	2.85751e-26	DN	-4.76317	9.17455e-27	DN	-2.29621	1.67296e-14	DN	-2.57997	1.40341e-27	DN	2.6647	4.70851e-39	UP	1.80089	1.22861e-20	-	-2.11596	0.0254646	-	0.294145	1	-	0.0023111	1	-	3.09372	5.85508e-16	UP	-0.154826	1	-
ENSMUSG00000024276	Zfp397	2.06544	1.02972e-12	UP	-0.575028	1	-	1.09031	0.108129	-	-0.323972	0.132174	-	-1.86792	0.242782	-	-0.927936	0.000155824	-	-3.06927	1.70481e-18	DN	0.0307671	1	-	0.169347	0.49654	-	0.364457	0.272582	-	0.101197	0.932026	-	0.547739	0.457673	-	-1.61143	1	-	0.738023	0.750367	-	0.576234	0.604023	-	-0.0566919	1	-
ENSMUSG00000019302	Atp6v0a1	2.06349	2.70406e-13	UP	-0.932593	1	-	0.0101689	1	-	0.309586	0.101047	-	-0.774692	0.810448	-	0.925066	1.10254e-06	-	0.0442938	1	-	-0.89058	0.000627786	-	-1.01376	3.08261e-07	-	-1.42519	2.63683e-05	-	-1.37692	5.25938e-07	-	0.81829	0.160415	-	0.0434588	1	-	-0.888792	1	-	-1.38021	0.351531	-	-1.62817	1	-
ENSMUSG00000021190	Lgmn	2.04285	2.99456e-13	UP	-0.431125	1	-	-0.51168	1	-	-0.427667	0.0187957	-	-0.656867	0.927357	-	-0.0890105	0.902476	-	0.288389	0.264943	-	-0.297454	0.314409	-	-1.23231	4.62138e-11	-	0.57808	0.0391035	-	0.436085	0.1087	-	0.0527642	1	-	0.299828	1	-	0.698299	0.725583	-	-0.494742	1	-	-1.2089	1	-
ENSMUSG00000042050	Wdr60	2.02357	8.04117e-12	UP	-0.0070447	1	-	0.635324	0.481931	-	-0.435491	0.0327867	-	-1.01643	0.630763	-	-0.649902	0.0107382	-	-1.38661	3.50865e-06	-	0.0199775	1	-	-0.0634438	0.976314	-	0.315072	0.375948	-	0.0767304	0.983529	-	0.526974	0.47838	-	-0.586274	1	-	1.54568	0.155036	-	0.600573	0.565178	-	0.775831	1	-
ENSMUSG00000020483	Dynll2	2.00862	1.21152e-12	UP	0.565608	1	-	-0.536072	0.995776	-	-0.0809414	0.822002	-	-0.970289	0.615968	-	-0.880399	7.41968e-05	-	-1.9965	2.05137e-12	-	-0.177	0.637013	-	0.354353	0.0626441	-	0.72364	0.00609488	-	-0.212249	0.692185	-	-1.07864	0.27829	-	-0.601898	1	-	-0.574539	1	-	0.128561	1	-	0.140806	1	-
ENSMUSG00000026600	Soat1	2.00623	3.0545e-12	UP	-1.00751	1	-	-0.0580352	1	-	-1.69932	4.00756e-20	-	-2.58592	0.0851317	-	-1.41257	5.27468e-09	-	-1.32885	3.32727e-06	-	1.42408	5.75446e-14	-	-0.807397	6.04985e-05	-	1.63938	1.78388e-13	-	-0.334897	0.445717	-	0.279661	0.819963	-	0.793891	1	-	2.17757	0.00812659	UP	-0.10305	1	-	-1.53258	1	-
ENSMUSG00000038119	Cdon	-2.00179	0.000484716	DN	-0.0976541	1	-	2.35815	1.53011e-06	UP	-3.0744	1.62914e-42	DN	-1.47914	0.400609	-	-3.41893	1.88728e-27	DN	-4.34156	1.10185e-24	DN	-0.205974	0.659176	-	-2.79701	5.86129e-30	DN	0.597593	0.049257	-	1.47325	1.66245e-12	-	-0.729714	0.695522	-	1.13299	1	-	1.52149	0.188505	-	5.22886	6.89599e-76	UP	-0.472167	1	-
ENSMUSG00000030122	Ptms	-2.00676	2.76019e-05	DN	0.333957	1	-	-0.496667	1	-	-0.0406134	0.998218	-	-0.930665	0.636577	-	-0.149808	0.676373	-	-1.14401	8.5032e-06	-	0.407615	0.0796927	-	0.163015	0.495721	-	0.82444	0.00102063	-	0.0446874	1	-	-1.06593	0.275135	-	-0.442961	1	-	0.268824	1	-	0.756771	0.308401	-	-0.823462	1	-
ENSMUSG00000045394	Epcam	-2.01542	8.40723e-06	DN	-0.525962	1	-	-0.0626751	1	-	0.219241	0.266727	-	-1.47141	0.234725	-	0.217671	0.386187	-	-0.566342	0.029032	-	-4.18117	4.16622e-49	DN	0.224229	0.292577	-	0.564634	0.0415451	-	0.131441	0.84832	-	1.81782	8.34715e-06	-	1.19753	1	-	0.968784	0.633743	-	-0.070283	1	-	-1.62946	1	-
ENSMUSG00000028063	Lmna	-2.01988	2.83551e-05	DN	0.138249	1	-	-0.089152	1	-	0.0861047	0.784312	-	-1.3373	0.37101	-	-0.233174	0.411315	-	-1.75189	1.75925e-10	-	0.709531	0.000566989	-	0.709041	1.71884e-05	-	-0.28837	0.513958	-	-0.362976	0.304168	-	-0.348024	1	-	-0.198349	1	-	-0.133354	1	-	-0.275645	1	-	-0.160482	1	-
ENSMUSG00000039782	Cpeb2	-2.03043	0.000226769	DN	-0.407563	1	-	0.679657	0.435502	-	-0.713309	0.000193795	-	2.61503	1.36138e-08	UP	0.431938	0.0549197	-	2.48513	6.99864e-39	UP	-1.23538	7.10417e-06	-	-1.64258	2.42237e-14	-	-0.980788	0.00772237	-	-1.05436	0.000366066	-	-0.604444	0.801999	-	-1.73948	1	-	-0.263443	1	-	-0.243479	1	-	-0.184774	1	-
ENSMUSG00000063856	Gpx1	-2.03093	1.99629e-05	DN	0.138737	1	-	-1.15223	0.42747	-	0.802785	6.25194e-08	-	-1.42843	0.327786	-	0.488999	0.0150682	-	-1.73381	7.07673e-11	-	-0.339685	0.221492	-	0.217105	0.312387	-	-1.10036	0.00034325	-	0.0682773	1	-	-1.65238	0.0454933	-	-0.738775	1	-	-1.33314	1	-	-0.786154	0.824613	-	-0.565915	1	-
ENSMUSG00000042712	Tceal9	-2.03761	2.02367e-05	DN	0.364383	1	-	-0.628536	0.891385	-	0.376413	0.0272042	-	-1.57	0.280273	-	-1.26454	8.75968e-09	-	-3.41259	2.0455e-28	DN	-0.335956	0.229754	-	0.676868	4.09362e-05	-	-0.067714	1	-	1.07317	6.75309e-08	-	-0.874063	0.427249	-	-0.266588	1	-	-0.952381	1	-	-0.0205012	1	-	-0.177137	1	-
ENSMUSG00000034168	Irf2bpl	-2.03844	3.71259e-05	DN	-0.573774	1	-	-0.330172	1	-	0.205667	0.322772	-	-1.3966	0.353091	-	-0.245524	0.385003	-	-2.89214	8.6527e-21	DN	-0.278009	0.365888	-	-0.101301	0.789384	-	1.2576	6.66067e-08	-	0.334776	0.294696	-	-1.03257	0.310136	-	-0.635619	1	-	-0.00315573	1	-	2.06849	3.08502e-06	UP	-1.42425	1	-
ENSMUSG00000023067	Cdkn1a	-2.046	1.82159e-05	DN	-0.753788	1	-	-1.25811	0.356975	-	0.953937	5.61639e-11	-	-1.39554	0.343623	-	0.566664	0.0038978	-	-1.2428	1.52259e-06	-	0.577144	0.0068669	-	-0.143703	0.609992	-	-2.2903	6.6693e-13	DN	-0.594424	0.0346938	-	-1.171	0.208893	-	-1.8436	1	-	-2.73807	0.503724	-	-3.05789	0.00172117	DN	-2.29004	1	-
ENSMUSG00000034926	Dhcr24	-2.05928	6.00434e-05	DN	-0.1428	1	-	0.117793	1	-	0.845773	5.41642e-08	-	-2.09896	0.164661	-	-0.0358801	1	-	-2.14727	8.4121e-13	DN	-1.0322	6.31193e-05	-	0.74936	1.21262e-05	-	-1.55952	3.97543e-06	-	-0.975629	0.000454219	-	1.80273	1.55763e-05	-	1.28225	1	-	-0.390742	1	-	-2.29528	0.0412641	-	0.0213228	1	-
ENSMUSG00000034708	Grn	-2.06242	2.25436e-05	DN	-1.00996	1	-	-0.288033	1	-	0.214962	0.288082	-	-0.608407	0.980384	-	0.570963	0.00395543	-	0.13867	0.70257	-	0.343493	0.166086	-	-0.621638	0.00108993	-	-0.513871	0.173302	-	-0.166573	0.812204	-	0.955088	0.0693709	-	0.883712	1	-	-0.188099	1	-	-0.556506	1	-	-0.870934	1	-
ENSMUSG00000038295	Atg9b	-2.06928	6.4143e-05	DN	-0.429807	1	-	1.37438	0.020737	-	-0.0668449	0.889742	-	2.25094	4.19473e-06	UP	0.415234	0.0584752	-	1.33157	9.64555e-11	-	-3.78065	1.98952e-33	DN	0.162147	0.527626	-	-3.22313	2.36693e-17	DN	-2.3271	5.35045e-16	DN	2.02646	4.07707e-07	UP	-0.454353	1	-	-2.1656	0.839949	-	-2.29573	0.0452466	-	0.591621	1	-
ENSMUSG00000035799	Twist1	-2.06948	0.000383531	DN	-0.415445	1	-	-2.69245	0.0432536	-	-3.98942	4.68862e-54	DN	-3.33426	0.0547315	-	-4.11215	6.53608e-31	DN	-3.89286	1.47994e-20	DN	6.37386	2.11296e-299	UP	-4.54141	2.94058e-48	DN	-2.0338	2.12259e-07	DN	-3.27123	1.37088e-19	DN	-2.89865	0.00379357	DN	-0.957918	1	-	-0.987934	1	-	-3.97138	0.0030036	DN	-1.40499	1	-
ENSMUSG00000000278	Scpep1	-2.07095	5.79135e-05	DN	-0.628677	1	-	-0.527406	1	-	-0.515311	0.00574585	-	-1.31234	0.406897	-	-0.494127	0.0478612	-	-0.794639	0.00419146	-	2.50205	1.53453e-48	UP	-0.643858	0.00135674	-	-0.566125	0.140073	-	-0.746263	0.0104405	-	-0.431518	0.976941	-	0.153199	1	-	-0.353368	1	-	-0.284166	1	-	-1.12619	1	-
ENSMUSG00000020585	Laptm4a	-2.08988	1.06074e-05	DN	-0.828268	1	-	-0.60618	0.912227	-	0.314176	0.0749553	-	-1.81298	0.203287	-	0.222345	0.369969	-	-0.508872	0.0513976	-	0.481706	0.0290411	-	-0.0832229	0.837065	-	-0.588793	0.0775662	-	-0.0696649	1	-	0.9047	0.112969	-	0.619707	1	-	-0.53591	1	-	-0.554393	1	-	-1.59629	1	-
ENSMUSG00000023905	Tnfrsf12a	-2.09533	1.15798e-05	DN	-0.14442	1	-	-0.486284	1	-	0.749859	5.71796e-07	-	-1.51821	0.296247	-	-0.438605	0.05993	-	-2.85467	3.91413e-22	DN	-1.13234	1.87459e-06	-	1.14675	7.17243e-14	-	-1.00851	0.00111274	-	-0.318169	0.396364	-	0.70228	0.282013	-	0.110196	1	-	-0.754118	1	-	-1.83393	0.0993399	-	-0.404411	1	-
ENSMUSG00000045763	Basp1	-2.09675	1.54497e-05	DN	-0.00850789	1	-	-0.945902	0.604153	-	0.63477	4.56689e-05	-	-1.08295	0.525946	-	0.423008	0.044455	-	-1.50666	1.35603e-08	-	0.375107	0.119991	-	-0.630654	0.00092765	-	-1.80077	2.39901e-08	-	0.943026	5.33426e-06	-	-0.827199	0.480347	-	-0.487993	1	-	-2.06847	0.828545	-	-3.22568	0.00117138	DN	-1.01365	1	-
ENSMUSG00000034573	Ptpn13	-2.09734	2.63934e-05	DN	-0.641677	1	-	0.69615	0.367885	-	0.739971	1.74839e-06	-	-0.276481	1	-	0.624013	0.00169598	-	-1.02987	0.000142872	-	-2.20519	7.12933e-17	DN	0.701873	3.21731e-05	-	-1.29362	8.1423e-05	-	-1.36678	2.64431e-07	-	0.973556	0.0673744	-	-0.804754	1	-	-0.428659	1	-	-2.03165	0.0718031	-	-1.16947	1	-
ENSMUSG00000038235	F11r	-2.12884	9.7655e-06	DN	-1.17065	1	-	-0.641138	0.874933	-	0.552439	0.000463996	-	-0.22636	1	-	0.72047	0.000135741	-	0.48872	0.0318253	-	-1.80482	3.82717e-13	-	0.0513678	0.938582	-	-1.176	0.000221802	-	-0.520958	0.0769782	-	0.796362	0.148628	-	-0.0530757	1	-	-0.825009	1	-	-0.917847	0.68716	-	-2.63984	1	-
ENSMUSG00000024909	Efemp2	-2.13426	4.41198e-05	DN	0.0657556	1	-	0.192874	0.969634	-	-1.26731	1.95562e-12	-	-2.03742	0.187712	-	-1.78091	5.01059e-13	-	-3.83275	2.48224e-26	DN	2.94018	7.93053e-71	UP	-1.13426	1.35213e-08	-	0.488384	0.0975448	-	0.304193	0.352695	-	-0.407539	1	-	1.00083	1	-	0.525038	0.935817	-	-1.52705	0.272021	-	-1.18904	1	-
ENSMUSG00000060591	Ifitm2	-2.13458	8.24413e-06	DN	0.217321	1	-	-0.436688	1	-	-0.46476	0.00862198	-	-1.60399	0.268393	-	-1.3926	2.65731e-10	-	-3.66482	1.30458e-31	DN	1.85557	3.42402e-27	-	0.369268	0.0454948	-	-1.04002	0.000750741	-	0.514924	0.0372006	-	0.0236526	1	-	0.58134	1	-	-1.09862	1	-	0.36635	0.940499	-	-0.491684	1	-
ENSMUSG00000032348	Gsta4	-2.13905	9.5064e-06	DN	-0.229728	1	-	-1.38097	0.285495	-	1.22244	9.07346e-18	-	-1.95386	0.174751	-	0.855825	3.66774e-06	-	-1.16177	7.40845e-06	-	-2.61806	4.30592e-24	DN	0.349203	0.064804	-	-1.37373	9.09228e-06	-	-1.02794	5.93875e-05	-	-1.13237	0.236022	-	-0.677673	1	-	-1.51116	1	-	-2.34017	0.0237048	-	-0.743697	1	-
ENSMUSG00000056737	Capg	-2.14279	6.9069e-06	DN	-0.404893	1	-	-1.309	0.319108	-	0.661802	1.35563e-05	-	-0.41197	1	-	1.2058	3.52377e-12	-	0.825155	8.00376e-05	-	-2.27221	9.02877e-20	DN	-0.255511	0.250749	-	-1.26349	3.50652e-05	-	-1.19867	1.66643e-06	-	-1.50771	0.0741333	-	-1.09923	1	-	-1.85163	0.92239	-	-1.24925	0.389979	-	-0.919449	1	-
ENSMUSG00000031591	Asah1	-2.14581	8.80471e-06	DN	-0.5152	1	-	0.152032	0.996754	-	0.385842	0.0233314	-	-1.91122	0.183529	-	0.17908	0.516862	-	-1.71151	3.42504e-10	-	0.12008	0.754481	-	-0.114932	0.727184	-	-0.983902	0.00156968	-	0.518111	0.0368059	-	1.34476	0.0047558	-	1.15557	1	-	-0.48256	1	-	-0.088076	1	-	-0.95659	1	-
ENSMUSG00000036492	Rnf39	-2.15334	0.000411364	DN	-1.19889	1	-	-0.411953	1	-	-1.69234	5.93357e-16	-	3.81597	1.41798e-23	UP	-0.277247	0.441413	-	3.72095	3.01784e-92	UP	-3.77086	6.64378e-24	DN	-3.41928	2.23125e-35	DN	-2.67228	3.75062e-10	DN	-3.12773	5.11904e-18	DN	-2.3399	0.0253765	-	-1.27599	1	-	-0.429176	1	-	-0.272656	1	-	0.864937	1	-
ENSMUSG00000039450	Dcxr	-2.1552	1.23694e-05	DN	-0.175612	1	-	-0.667843	0.860125	-	0.176248	0.418115	-	-0.337192	1	-	0.905164	1.07493e-06	-	0.238354	0.391517	-	0.346534	0.165944	-	-0.552845	0.00453234	-	-1.04831	0.00138931	-	-0.00215355	1	-	-1.39378	0.120406	-	-0.272266	1	-	-1.3847	1	-	-1.36533	0.333235	-	-0.344337	1	-
ENSMUSG00000026147	Col9a1	-2.15802	0.00260539	DN	-0.343976	1	-	-0.471721	1	-	-4.57028	8.39527e-43	DN	-3.08915	0.163312	-	-3.45632	1.82984e-18	DN	-4.44452	2.39456e-16	DN	-2.00984	3.04672e-08	DN	-5.15683	7.05963e-37	DN	5.32256	1.59667e-145	UP	-3.21853	1.20332e-13	DN	-3.65561	0.00581536	DN	1.75768	1	-	4.43077	4.82559e-14	UP	1.56321	0.0258877	-	0.426461	1	-
ENSMUSG00000024048	Myl12a	-2.15957	5.71169e-06	DN	0.352747	1	-	-1.41315	0.255386	-	0.736587	8.47672e-07	-	-0.959377	0.608887	-	0.282486	0.217654	-	-0.473743	0.0726077	-	-0.567558	0.0223138	-	0.365137	0.0473846	-	-0.960041	0.00187167	-	-0.227585	0.631101	-	-1.40003	0.104794	-	-0.92809	1	-	-1.70196	1	-	-0.841667	0.766133	-	-1.11726	1	-
ENSMUSG00000025351	Cd63	-2.16466	6.35774e-06	DN	-0.122471	1	-	0.15883	1	-	-0.491316	0.00512668	-	-2.18673	0.115908	-	-1.43899	7.29276e-11	-	-3.47729	2.29359e-29	DN	1.56877	8.41971e-19	-	0.0394519	0.988647	-	0.19397	0.656039	-	0.418461	0.124355	-	1.51702	0.000664509	-	1.62265	1	-	0.234374	1	-	0.34053	0.979041	-	-1.25401	1	-
ENSMUSG00000005125	Ndrg1	-2.16536	1.35777e-05	DN	-0.149572	1	-	-0.857733	0.687006	-	-0.306053	0.123801	-	1.50854	0.0249719	-	0.317237	0.167478	-	2.12701	6.40007e-30	UP	-1.32394	1.27344e-07	-	-0.940056	6.99344e-07	-	-1.04493	0.00160542	-	0.161402	0.776413	-	-1.12002	0.259542	-	-1.03373	1	-	-1.88112	0.950632	-	-1.39116	0.326737	-	-1.18513	1	-
ENSMUSG00000021591	Glrx	-2.17249	0.000110437	DN	-0.589684	1	-	-1.36273	0.407207	-	-0.592389	0.00252828	-	1.34056	0.100671	-	-0.199653	0.623698	-	2.91798	7.05255e-53	UP	-0.160206	0.7908	-	-1.43741	2.20081e-11	-	-1.32535	0.000300159	-	-0.833804	0.00774778	-	-2.22172	0.0197101	-	-1.66276	1	-	-2.2089	0.919015	-	-2.4097	0.0585715	-	0.155342	1	-
ENSMUSG00000031451	Gas6	-2.1798	2.28088e-05	DN	0.20557	1	-	0.782898	0.299467	-	-2.15457	5.8593e-31	DN	-2.19399	0.149737	-	-3.44696	1.53646e-35	DN	-4.74126	4.35287e-36	DN	2.83615	1.09373e-65	UP	-1.24067	3.57487e-10	-	-1.5488	4.32802e-06	-	1.68937	5.13886e-19	-	-0.0755077	1	-	1.40411	1	-	-1.55776	1	-	0.238902	1	-	-0.828744	1	-
ENSMUSG00000002059	Rab34	-2.18356	2.7163e-05	DN	0.0161261	1	-	0.0793254	1	-	-1.11807	3.51974e-10	-	-1.87423	0.218613	-	-2.00198	9.04266e-16	DN	-3.36352	6.12653e-23	DN	2.30817	2.00611e-40	UP	-0.204626	0.452332	-	0.497562	0.0883304	-	0.583435	0.0163695	-	-1.11021	0.283189	-	-0.790744	1	-	0.408093	1	-	0.795948	0.309604	-	-0.500504	1	-
ENSMUSG00000027940	Tpm3	-2.18419	5.51688e-06	DN	0.00594237	1	-	-0.514097	1	-	0.513282	0.00129934	-	-1.31223	0.376894	-	0.659912	0.000550024	-	-0.64745	0.0118981	-	-0.279569	0.349078	-	0.27826	0.161952	-	-0.65918	0.0444152	-	-0.595097	0.0340201	-	-0.453277	0.933321	-	-0.435399	1	-	-0.434224	1	-	-0.965991	0.640992	-	-1.36067	1	-
ENSMUSG00000058587	Tmod3	-2.19234	6.65146e-06	DN	-0.723781	1	-	-0.589331	0.932606	-	0.643797	3.3376e-05	-	-1.15024	0.47322	-	0.625905	0.00132422	-	-0.227523	0.494881	-	-1.09335	7.94979e-06	-	0.551442	0.00138858	-	-1.16294	0.000286587	-	-0.839597	0.0013876	-	-0.221802	1	-	-1.3411	1	-	-1.09529	1	-	-1.32332	0.345055	-	-1.12858	1	-
ENSMUSG00000028465	Tln1	-2.19656	8.20051e-06	DN	0.21505	1	-	-0.099956	1	-	0.111492	0.673597	-	-1.19644	0.453169	-	-0.236009	0.408364	-	-1.90424	1.20943e-11	-	0.804329	7.36511e-05	-	0.381918	0.0409843	-	-0.430964	0.290654	-	0.0859271	0.978226	-	0.30601	0.746913	-	0.160372	1	-	-0.597757	1	-	-0.0615523	1	-	0.104474	1	-
ENSMUSG00000060572	Mfap2	-2.20628	0.00014241	DN	-0.316363	1	-	-1.18761	0.517461	-	-3.83715	1.00873e-55	DN	-2.68253	0.115172	-	-4.96935	1.33602e-39	DN	-5.36351	4.63255e-29	DN	6.44178	9.33515045e-315	-	-5.04309	1.3769e-57	DN	-2.1932	1.83291e-08	DN	-4.34928	1.46109e-28	DN	-3.249	0.00102779	DN	1.41745	1	-	-1.14517	1	-	-4.54367	0.0007725	DN	-0.976597	1	-
ENSMUSG00000048277	Syngr2	-2.21743	7.90318e-06	DN	-0.379639	1	-	-0.232838	1	-	0.583026	0.000260306	-	-1.75469	0.228942	-	0.174072	0.54677	-	-1.35174	6.45239e-07	-	-1.1741	2.24824e-06	-	0.582667	0.000753159	-	-0.904774	0.00661617	-	0.0441442	1	-	1.03432	0.0444849	-	0.683321	1	-	-0.981806	1	-	-0.177363	1	-	-1.18304	1	-
ENSMUSG00000038393	Txnip	-2.21761	5.49542e-06	DN	-1.39958	1	-	-1.08808	0.492887	-	-0.778522	4.64163e-06	-	1.09768	0.197566	-	0.979482	7.13483e-08	-	2.51485	1.97285e-45	UP	-1.46434	1.59053e-09	-	-2.61113	3.19946e-38	DN	0.30156	0.386301	-	-1.20111	2.41859e-06	-	-2.11816	0.00844084	DN	-2.24573	1	-	-0.266401	1	-	1.13272	0.0824715	-	-1.75885	1	-
ENSMUSG00000039208	Metrnl	-2.22365	1.13732e-05	DN	-1.31782	1	-	-1.67503	0.167877	-	-0.088535	0.815166	-	-0.490528	1	-	1.38364	5.2094e-15	-	1.71953	2.18914e-18	-	-0.612989	0.0205247	-	-1.45761	1.04796e-13	-	-0.621226	0.0898998	-	-1.12239	2.91631e-05	-	-0.692374	0.636605	-	-0.528254	1	-	-0.780741	1	-	-1.62996	0.198366	-	-2.19872	1	-
ENSMUSG00000026628	Atf3	-2.22867	5.89897e-06	DN	-1.42837	1	-	0.248637	0.873361	-	-0.341586	0.0746333	-	-2.27194	0.111594	-	-0.226148	0.437441	-	-1.46601	3.64033e-08	-	-1.83373	1.57932e-13	-	-0.464165	0.0197084	-	1.30426	1.37355e-08	-	1.37068	9.29088e-13	-	-0.304608	1	-	-1.55945	1	-	0.517686	0.88119	-	2.47721	2.148e-09	UP	-1.10659	1	-
ENSMUSG00000007039	Ddah2	-2.22873	7.16899e-06	DN	-0.00684585	1	-	-0.643046	0.885126	-	0.406634	0.0177005	-	-1.46004	0.328114	-	-0.456472	0.05424	-	-4.05307	1.56211e-32	DN	0.183874	0.557018	-	-0.197946	0.428128	-	1.21166	2.30852e-07	-	0.516697	0.042032	-	-0.97404	0.353074	-	-0.133398	1	-	-0.0711479	1	-	0.391628	0.78312	-	-0.628875	1	-
ENSMUSG00000037242	Clic4	-2.23007	9.24459e-06	DN	-0.421741	1	-	-0.248735	1	-	0.27475	0.153606	-	-0.679572	0.917732	-	-0.264967	0.340474	-	0.140531	0.70814	-	-0.100408	0.883575	-	0.858442	1.98596e-07	-	-1.84842	2.78876e-08	-	-0.696301	0.0163599	-	0.694108	0.249261	-	-0.386359	1	-	-1.14478	1	-	-0.745522	0.892552	-	-1.24939	1	-
ENSMUSG00000022602	Arc	-2.23365	4.41444e-05	DN	-0.746982	1	-	0.860884	0.255303	-	-0.829719	9.01342e-06	-	0.669476	0.457258	-	0.376217	0.0990806	-	0.845767	0.000159148	-	-1.52126	2.42239e-08	-	-1.50029	8.39907e-13	-	2.05915	6.01223e-21	UP	-0.0104952	1	-	-1.48003	0.135026	-	-1.09657	1	-	1.10199	0.415986	-	1.52824	0.00586624	-	-0.443262	1	-
ENSMUSG00000021458	Aopep	-2.23589	4.51599e-06	DN	-0.55314	1	-	0.96134	0.141997	-	0.611104	8.9226e-05	-	-0.762022	0.813208	-	0.538505	0.00697493	-	-1.46233	5.92998e-08	-	-1.48918	7.24938e-10	-	0.491828	0.00510032	-	-1.15727	0.000318391	-	-0.430205	0.182972	-	1.09612	0.0390296	-	-0.926314	1	-	-0.240862	1	-	-0.534047	1	-	-0.635982	1	-
ENSMUSG00000029108	Pcdh7	-2.23624	1.07711e-05	DN	-0.935449	1	-	0.802768	0.270341	-	-0.298937	0.140024	-	-2.20982	0.137186	-	-0.775299	0.000910034	-	-2.05617	1.90783e-12	DN	1.24211	9.24472e-11	-	0.856696	2.30843e-07	-	-3.53886	1.44415e-20	DN	-0.155878	0.892896	-	1.83535	7.57787e-06	-	0.217309	1	-	-3.09148	0.424278	-	-1.67407	0.184667	-	0.0808263	1	-
ENSMUSG00000037815	Ctnna1	-2.24116	3.10588e-06	DN	-0.245684	1	-	-0.223625	1	-	0.468136	0.00387625	-	-0.680586	0.888907	-	0.466875	0.0214514	-	9.2836e-05	1	-	-1.38053	7.09593e-09	-	0.265061	0.187561	-	-0.497006	0.156453	-	-0.0907474	1	-	-0.10765	1	-	-0.521788	1	-	-0.905399	1	-	-0.0927536	1	-	-1.63265	1	-
ENSMUSG00000097124	A530020G20Rik	-2.24171	0.00161761	DN	-0.638571	1	-	2.67853	3.00996e-07	UP	-4.3815	3.07949e-41	DN	-1.18828	0.67742	-	-4.11316	1.00313e-21	DN	-3.6753	6.39409e-14	DN	-2.66016	6.8294e-12	DN	-2.89092	2.64013e-21	DN	3.76528	3.87751e-67	UP	-0.377865	0.525041	-	-1.38955	0.30292	-	-0.0395391	1	-	4.1351	1.74253e-11	UP	3.5108	3.49829e-17	UP	0.513465	1	-
ENSMUSG00000026796	Fam129b	-2.25882	5.45067e-06	DN	-0.42078	1	-	-0.301562	1	-	0.0908851	0.768811	-	0.988649	0.216903	-	1.06915	3.20494e-09	-	1.79332	8.3836e-21	-	-1.39317	2.31346e-08	-	-0.831053	1.03129e-05	-	-1.47663	5.4184e-06	-	-1.50241	1.11201e-08	-	-0.645773	0.696136	-	-0.320244	1	-	-1.259	1	-	-1.00357	0.624257	-	-1.09022	1	-
ENSMUSG00000109901	Chmp1b	-2.26022	7.14263e-06	DN	-0.790341	1	-	-1.15549	0.447783	-	0.411806	0.0173103	-	-0.0607661	1	-	1.36088	1.16213e-14	-	1.15618	2.43126e-08	-	-1.36711	5.41604e-08	-	-0.584964	0.00279969	-	-1.86791	1.91222e-08	-	-1.15587	1.39906e-05	-	-1.13263	0.24762	-	-1.18558	1	-	-1.35372	1	-	-1.54363	0.232504	-	-0.921579	1	-
ENSMUSG00000026417	Pigr	-2.26219	0.00275784	DN	-2.29227	1	-	2.19363	0.00080863	UP	-1.95571	7.45285e-15	-	-0.730174	1	-	0.37221	0.220177	-	0.753109	0.0101981	-	-3.04808	1.83528e-14	DN	-4.57935	8.55827e-40	DN	-0.0720044	1	-	2.70644	9.57097e-32	UP	-2.62608	0.057718	-	-0.269901	1	-	-0.424739	1	-	1.50179	0.0494	-	-0.717813	1	-
ENSMUSG00000049382	Krt8	-2.26537	2.71263e-06	DN	0.174716	1	-	-0.355149	1	-	0.748189	6.67004e-07	-	-1.61025	0.268736	-	-0.0874219	0.906166	-	-2.99147	2.46185e-24	DN	-3.70586	1.13517e-39	DN	-0.136577	0.640475	-	1.03647	1.34805e-05	-	0.664646	0.00333113	-	-0.486747	0.758202	-	-0.202835	1	-	0.610269	0.788749	-	1.12299	0.0830924	-	-0.810551	1	-
ENSMUSG00000021876	Rnase4	-2.26567	3.29309e-05	DN	0.0970786	1	-	-0.541558	1	-	-1.55648	1.00308e-16	-	-2.18148	0.170601	-	-2.31605	2.66784e-18	DN	-3.55617	1.60165e-22	DN	3.33503	7.76692e-90	UP	-0.37922	0.0984804	-	-1.86204	2.03346e-07	-	0.161515	0.763061	-	-0.5494	0.852297	-	0.583298	1	-	-0.837221	1	-	-0.565911	1	-	0.216181	1	-
ENSMUSG00000018932	Map2k3	-2.26607	6.99961e-06	DN	-0.935873	1	-	-0.578775	0.95984	-	-0.336832	0.0840397	-	1.62767	0.00972431	-	0.0901386	0.861407	-	2.45934	1.26592e-41	UP	-1.06289	2.42986e-05	-	-0.401749	0.0518614	-	-1.76852	9.51626e-08	-	-1.04584	0.000102581	-	-1.0609	0.301	-	-1.21854	1	-	-1.47178	1	-	-1.74858	0.148711	-	-2.30302	1	-
ENSMUSG00000027397	Slc20a1	-2.267	1.36198e-05	DN	-0.723311	1	-	0.197588	0.955837	-	0.790406	5.70328e-07	-	0.28214	0.882471	-	-0.0114014	1	-	-1.36717	1.30885e-06	-	0.236898	0.378817	-	0.633892	0.000341942	-	-2.96798	1.42976e-15	DN	-2.20702	7.69185e-15	DN	1.43722	0.00197748	-	-0.206425	1	-	-1.62635	1	-	-2.55157	0.022085	-	-1.15728	1	-
ENSMUSG00000014077	Chp1	-2.26943	4.4649e-06	DN	-0.947452	1	-	-1.64251	0.169692	-	0.0356075	0.998099	-	0.838682	0.299344	-	1.2246	4.24066e-12	-	2.17153	7.64545e-32	UP	-1.42691	9.32542e-09	-	-1.57609	1.51342e-16	-	-1.20032	0.000208815	-	-1.57121	1.99267e-09	-	-1.97231	0.0158638	-	-2.28445	1	-	-2.9944	0.425077	-	-1.22816	0.423785	-	-1.56043	1	-
ENSMUSG00000030800	Prss8	-2.27813	8.21561e-06	DN	-1.45565	1	-	-1.1603	0.465494	-	-1.48662	1.72862e-17	-	2.13629	2.0828e-05	UP	0.116466	0.76362	-	3.63852	5.09219e-106	UP	-3.75294	2.56795e-35	DN	-3.01151	9.71182e-43	DN	-0.195615	0.832503	-	-1.25762	3.21271e-06	-	-1.39902	0.132218	-	-1.55397	1	-	-0.411334	1	-	-0.5649	1	-	-1.67853	1	-
ENSMUSG00000029781	Fkbp9	-2.287	1.02317e-05	DN	-0.0647241	1	-	0.308081	0.831051	-	-1.47254	1.79616e-16	-	-2.83821	0.048717	-	-2.64977	2.34148e-24	DN	-4.30891	3.40483e-31	DN	1.72379	1.69214e-21	-	-0.246709	0.299886	-	2.10593	8.37912e-24	UP	-0.136743	0.948309	-	0.69599	0.261334	-	1.39992	1	-	1.66131	0.0887021	-	0.783511	0.315201	-	-0.702899	1	-
ENSMUSG00000037705	Tecta	-2.28767	0.000296306	DN	-1.00907	1	-	-1.13682	0.605928	-	-3.8752	7.83221e-48	DN	-2.63198	0.16247	-	-3.22571	8.05331e-22	DN	-4.0452	1.66153e-19	DN	-2.8941	1.79599e-16	DN	-4.01218	2.30307e-39	DN	5.54609	1.61542e-189	UP	-4.44193	2.12659e-24	DN	-2.71167	0.0128483	-	2.19218	1	-	4.46448	1.9829e-16	UP	-0.997962	0.796803	-	0.88363	1	-
ENSMUSG00000044641	Pard6b	-2.28997	9.07854e-06	DN	-1.10314	1	-	-1.10976	0.492818	-	-0.127341	0.650094	-	0.988075	0.224777	-	0.610849	0.00265819	-	2.80253	1.99398e-55	UP	-4.04611	1.03601e-36	DN	-1.35371	7.56125e-12	-	-1.53883	4.48195e-06	-	-1.12917	3.38533e-05	-	-1.19808	0.226379	-	-1.48223	1	-	-1.31982	1	-	-1.21773	0.461178	-	-0.828803	1	-
ENSMUSG00000023043	Krt18	-2.29613	1.93305e-06	DN	0.206205	1	-	-0.112763	1	-	0.088369	0.76986	-	-1.17706	0.457071	-	-0.244689	0.373501	-	-1.64538	5.30599e-10	-	-3.43704	8.02684e-37	DN	-0.60741	0.00129882	-	1.3937	3.70883e-10	-	1.28423	1.89732e-11	-	-0.885288	0.317778	-	-0.295452	1	-	0.674797	0.953548	-	2.08466	3.05687e-06	UP	-0.543855	1	-
ENSMUSG00000034459	Ifit1	-2.3036	1.1254e-05	DN	-2.11342	1	-	-1.9731	0.110817	-	-0.526976	0.00526135	-	-1.2287	0.485332	-	1.57081	2.28006e-18	-	2.73851	1.03204e-49	UP	-2.96994	7.63577e-25	DN	-3.51587	1.00099e-51	DN	-2.10122	1.8068e-09	DN	-0.351672	0.373346	-	-2.16531	0.013071	-	-1.95415	1	-	-2.36419	0.793507	-	-3.55804	0.00113578	DN	-2.19404	1	-
ENSMUSG00000025283	Sat1	-2.30369	1.74682e-06	DN	-0.435116	1	-	0.0885426	1	-	0.254965	0.175904	-	0.262344	1	-	0.809283	1.17601e-05	-	1.13625	1.66357e-08	-	-0.788223	0.00104237	-	-0.882608	1.71277e-06	-	-0.922172	0.00305523	-	-0.0579279	1	-	-0.814384	0.48592	-	-1.80213	1	-	-0.524489	1	-	-0.423676	1	-	-1.11569	1	-
ENSMUSG00000009097	Tbx1	-2.30405	1.73557e-05	DN	-0.210571	1	-	1.65342	0.00241488	-	-0.108065	0.740865	-	-1.01196	0.612295	-	-0.299097	0.311706	-	-1.61726	3.62769e-08	-	-1.37035	2.227e-07	-	-0.172922	0.570268	-	-1.83769	1.61554e-07	-	1.80931	9.97742e-22	-	-0.146064	1	-	-0.365261	1	-	-2.13555	0.838157	-	2.13349	2.71564e-06	UP	-0.22755	1	-
ENSMUSG00000033006	Sox10	-2.31575	0.000113909	DN	-0.128053	1	-	0.913868	0.256723	-	-4.0544	2.40581e-54	DN	-1.65663	0.343687	-	-3.86902	7.43109e-29	DN	-3.56743	1.27285e-18	DN	-3.06192	3.60572e-19	DN	-3.98914	2.1016e-42	DN	4.47612	3.8208e-129	UP	-0.987217	0.00183562	-	-2.9627	0.0035719	DN	0.396464	1	-	2.92802	4.81848e-05	UP	3.82136	1.33325e-27	UP	0.117397	1	-
ENSMUSG00000021242	Npc2	-2.32055	1.46522e-06	DN	-0.0163497	1	-	-0.554578	0.96649	-	-0.26761	0.179149	-	-1.35852	0.356083	-	-0.466167	0.0430988	-	-1.2967	5.12398e-07	-	1.22772	2.89553e-11	-	-0.372894	0.0651566	-	0.668727	0.01126	-	0.511844	0.0385302	-	0.172421	1	-	0.703733	1	-	0.447721	0.942676	-	-0.27369	1	-	-0.82322	1	-
ENSMUSG00000022472	Desi1	-2.32292	2.90979e-06	DN	-0.708769	1	-	-1.58957	0.19208	-	-0.147175	0.567678	-	0.524606	0.557468	-	1.15294	1.06751e-10	-	2.58538	5.87623e-48	UP	-1.79057	1.5468e-12	-	-1.68264	2.00283e-18	-	-2.45989	3.87959e-13	DN	-1.54619	3.76365e-09	-	-1.49589	0.0882013	-	-1.40796	1	-	-2.53325	0.602346	-	-1.60137	0.199188	-	-3.27002	1	-
ENSMUSG00000073418	C4b	-2.32499	0.00144842	DN	-0.190477	1	-	1.30291	0.111138	-	-4.44593	6.23246e-43	DN	-1.81851	0.423461	-	-3.77776	1.60925e-20	DN	-5.50243	1.90714e-19	DN	1.19258	1.57043e-06	-	-4.69376	1.44947e-35	DN	3.62623	3.4762e-57	UP	-1.58003	2.90461e-05	-	-2.64899	0.0414215	-	2.80204	1	-	3.85642	1.87014e-08	UP	2.93372	1.77849e-09	UP	0.108208	1	-
ENSMUSG00000021665	Hexb	-2.33405	3.25731e-06	DN	-1.01209	1	-	-0.668837	0.853738	-	-0.212399	0.337163	-	-0.343143	1	-	0.738496	0.000121242	-	1.74977	1.45449e-19	-	-0.210769	0.582871	-	-1.2335	1.25682e-10	-	-0.935889	0.00490718	-	-0.111184	0.961817	-	0.0866465	1	-	-0.116936	1	-	-0.543022	1	-	-0.82259	0.795334	-	-2.03981	1	-
ENSMUSG00000001089	Luzp1	-2.33463	2.93787e-06	DN	-0.425751	1	-	0.21186	0.933443	-	0.405207	0.0183952	-	-0.77342	0.805082	-	-0.152912	0.675988	-	-1.09168	4.79303e-05	-	-0.0128038	1	-	0.883402	5.23002e-08	-	-1.35159	3.11719e-05	-	-0.420735	0.205952	-	0.458585	0.517613	-	-0.700928	1	-	-0.765424	1	-	-1.28588	0.384767	-	-1.63393	1	-
ENSMUSG00000027966	Col11a1	-2.34459	6.11673e-05	DN	-0.293627	1	-	-0.0781629	1	-	-4.15458	2.42308e-60	DN	-2.25455	0.191374	-	-4.90476	7.1572e-39	DN	-4.40306	1.29677e-24	DN	2.61662	2.84724e-48	UP	-3.5842	1.09069e-40	DN	3.17414	1.69254e-56	UP	-1.74819	1.19228e-08	-	-0.767839	0.635671	-	2.09381	1	-	3.30731	3.71843e-07	UP	-0.824303	0.887634	-	-0.326809	1	-
ENSMUSG00000033684	Qsox1	-2.34818	1.83574e-06	DN	-0.97643	1	-	0.0898449	1	-	0.771877	3.35705e-07	-	-0.463487	1	-	0.89418	1.22657e-06	-	0.0752384	0.930961	-	-1.23893	2.68439e-07	-	-0.46925	0.0174082	-	-2.48827	1.24712e-13	DN	-0.300984	0.450221	-	1.29813	0.00809751	-	0.572577	1	-	-1.71672	1	-	-2.14755	0.0445166	-	-1.5107	1	-
ENSMUSG00000032440	Tgfbr2	-2.35863	2.39657e-06	DN	-0.656862	1	-	-0.121101	1	-	0.539296	0.000879713	-	-1.27734	0.40814	-	0.0756279	0.908252	-	-1.20284	8.17953e-06	-	-0.077753	0.953898	-	0.389993	0.0375189	-	-2.36996	2.67714e-12	DN	0.341693	0.279507	-	0.935855	0.0806886	-	-0.250147	1	-	-2.0772	0.820554	-	-1.59327	0.203407	-	0.187383	1	-
ENSMUSG00000031799	Tpm4	-2.3613	1.13511e-06	DN	0.357648	1	-	-0.240847	1	-	0.390723	0.0209555	-	-1.5865	0.273093	-	-0.522814	0.0216207	-	-2.01886	3.66877e-13	DN	0.192791	0.513828	-	0.931916	3.48365e-09	-	-0.689044	0.0343531	-	-0.158169	0.833019	-	-0.391123	1	-	-0.532381	1	-	-0.29754	1	-	-0.414119	1	-	-0.375373	1	-
ENSMUSG00000022565	Plec	-2.36946	1.41692e-06	DN	-0.654208	1	-	0.394963	0.693752	-	0.448952	0.00671982	-	-1.38485	0.353091	-	-0.447435	0.057096	-	-2.24321	4.15681e-15	DN	-0.188888	0.59933	-	1.04202	2.95399e-11	-	-1.73725	6.87366e-08	-	-0.506151	0.0925551	-	1.60606	0.000255962	-	0.585474	1	-	-1.07809	1	-	-1.40347	0.299226	-	0.41373	1	-
ENSMUSG00000027087	Itgav	-2.3696	2.62134e-06	DN	-0.946634	1	-	0.564746	0.513016	-	0.135677	0.583283	-	-0.53972	1	-	0.270378	0.261459	-	0.0931058	0.869891	-	0.146237	0.676036	-	0.0332642	1	-	-0.868647	0.0100212	-	-0.477709	0.151815	-	1.56498	0.000305295	-	0.967693	1	-	-0.355321	1	-	-1.28628	0.386797	-	-0.22123	1	-
ENSMUSG00000063765	Chadl	-2.37746	0.000135688	DN	-0.401118	1	-	-0.924851	0.72095	-	-3.09593	1.20362e-37	DN	-2.02754	0.263307	-	-3.65454	1.22165e-25	DN	-4.51514	8.25142e-22	DN	-2.28612	1.73633e-12	DN	-2.35876	5.25484e-21	DN	5.13536	6.59504e-168	UP	-1.99679	1.50278e-09	-	-2.22997	0.0357881	-	1.79816	1	-	4.09771	4.30543e-13	UP	0.263499	1	-	1.00118	1	-
ENSMUSG00000020857	Nme2	-2.37784	7.82917e-07	DN	0.650217	1	-	-0.969564	0.572166	-	-0.0147979	1	-	-1.38565	0.34423	-	-1.70229	2.44607e-14	-	-3.25045	8.94645e-28	DN	1.1883	1.43601e-10	-	0.94114	1.89077e-09	-	0.236733	0.533501	-	-0.222346	0.648274	-	-1.29598	0.143654	-	-0.133285	1	-	-1.02583	1	-	-0.962677	0.644153	-	-0.299974	1	-
ENSMUSG00000015647	Lama5	-2.38001	3.729e-06	DN	-0.128884	1	-	1.90418	0.000138516	-	0.489139	0.00329698	-	0.740288	0.372913	-	0.193147	0.487098	-	-0.96619	0.000427563	-	-2.38424	1.82306e-18	DN	-0.218236	0.372178	-	-0.273514	0.628476	-	0.141528	0.834691	-	1.5574	0.000428286	-	0.979106	1	-	0.700872	0.740429	-	-0.0574836	1	-	0.993815	1	-
ENSMUSG00000043091	Tuba1c	-2.3972	1.70682e-06	DN	-0.183178	1	-	-0.724152	0.807249	-	0.351761	0.0472201	-	-0.902956	0.676827	-	0.13185	0.69771	-	-0.251784	0.433793	-	-0.992593	6.78175e-05	-	0.524603	0.00289335	-	0.204038	0.643574	-	-0.356921	0.320303	-	-0.973032	0.354715	-	-0.660705	1	-	-0.315286	1	-	0.983427	0.130701	-	-0.982484	1	-
ENSMUSG00000018293	Pfn1	-2.39833	5.83024e-07	DN	-0.126654	1	-	-1.50137	0.213044	-	0.819818	2.57562e-08	-	-1.47923	0.305426	-	0.0617953	0.953771	-	-1.36051	1.37585e-07	-	-0.488407	0.0550255	-	0.790315	7.923e-07	-	-1.23416	5.12039e-05	-	-0.331359	0.357701	-	-1.56274	0.0604598	-	-1.0429	1	-	-1.88313	0.90609	-	-1.59026	0.183093	-	-1.05766	1	-
ENSMUSG00000018474	Chd3	-2.40011	1.96399e-06	DN	-0.112115	1	-	0.752053	0.315215	-	0.213017	0.299439	-	-0.241851	1	-	0.123541	0.730132	-	-1.34137	9.03423e-07	-	0.34359	0.17216	-	-0.282627	0.204208	-	-0.299332	0.555684	-	0.502548	0.0508076	-	0.427861	0.561766	-	-0.643749	1	-	0.17034	1	-	0.548378	0.577652	-	-0.753896	1	-
ENSMUSG00000050520	Cldn8	-2.40056	9.91143e-05	DN	-0.415658	1	-	0.973868	0.215087	-	-2.52569	1.21263e-29	DN	-1.98734	0.26952	-	-3.57763	2.90759e-26	DN	-4.51572	5.08052e-23	DN	-3.1937	7.65259e-20	DN	-2.60166	7.0617e-25	DN	1.5931	1.56076e-10	-	1.30324	4.24859e-09	-	-1.32439	0.260183	-	0.389004	1	-	1.0567	0.528123	-	5.63752	7.46626e-91	UP	0.355431	1	-
ENSMUSG00000029163	Emilin1	-2.41859	0.000143399	DN	-0.513516	1	-	-0.203297	1	-	-3.87087	7.29613e-48	DN	-1.87519	0.3107	-	-4.07139	4.72219e-28	DN	-3.4623	9.2121e-17	DN	6.17459	2.42449e-258	UP	-4.16	8.59659e-41	DN	-3.59479	1.56849e-13	DN	-3.42512	8.39681e-19	DN	-2.63501	0.013829	-	1.59501	1	-	-0.530934	1	-	-4.93162	0.00149011	DN	-1.36454	1	-
ENSMUSG00000026701	Prdx6	-2.42079	6.00631e-07	DN	-0.216578	1	-	-0.923736	0.613339	-	1.0714	8.20378e-14	-	-2.18608	0.116083	-	0.896645	8.68286e-07	-	-2.65576	1.69273e-20	DN	-0.785197	0.00112845	-	-0.0424721	1	-	-1.52021	7.92278e-07	-	-0.174457	0.783277	-	-1.07906	0.266219	-	-0.822852	1	-	-1.45005	1	-	-0.591786	1	-	-0.958838	1	-
ENSMUSG00000004044	Cavin1	-2.42326	1.31101e-06	DN	0.341227	1	-	-0.688172	0.842685	-	0.96606	7.68715e-11	-	-2.04396	0.161687	-	0.0490648	1	-	-3.15928	8.11637e-24	DN	-0.0719353	0.973199	-	0.767351	3.62745e-06	-	-1.82682	2.52827e-08	-	-0.794442	0.00419397	-	-0.516818	0.860392	-	0.114089	1	-	-1.02263	1	-	-3.09794	0.00230597	DN	-1.36918	1	-
ENSMUSG00000038612	Mcl1	-2.43227	5.32927e-07	DN	-1.04046	1	-	-0.380462	1	-	0.229367	0.239013	-	-0.0103847	1	-	0.605426	0.00176189	-	1.17309	4.80169e-09	-	-0.567135	0.0229979	-	-0.242682	0.286916	-	-0.626391	0.0580323	-	-0.763798	0.00377486	-	-0.455763	0.930759	-	-1.70397	1	-	-0.6519	1	-	-0.652434	0.97469	-	-0.993862	1	-
ENSMUSG00000038508	Gdf15	-2.43811	3.49838e-05	DN	0.393981	1	-	1.87031	0.000943601	-	-1.14196	7.24644e-09	-	-1.19072	0.590105	-	-2.21397	1.72223e-15	DN	-2.18495	5.02516e-11	DN	0.28536	0.319221	-	-1.90538	5.39245e-17	-	-0.8668	0.0298556	-	3.12326	3.75421e-66	UP	-0.203689	1	-	1.29064	1	-	0.291955	1	-	-0.386873	1	-	-2.00568	1	-
ENSMUSG00000005054	Cstb	-2.44389	4.06039e-07	DN	-0.0755498	1	-	-1.48744	0.215918	-	0.705648	2.80236e-06	-	-0.208247	1	-	0.739261	7.42645e-05	-	0.360267	0.132601	-	-1.07082	6.03502e-06	-	0.119961	0.660934	-	-1.74777	1.45076e-08	-	-0.499292	0.0924	-	-1.7673	0.028954	-	-0.831278	1	-	-1.77118	0.972808	-	-2.00304	0.0594661	-	-0.684518	1	-
ENSMUSG00000027208	Fgf7	-2.44721	6.21931e-05	DN	-1.26228	1	-	-1.12529	0.58639	-	-4.40536	6.77536e-60	DN	-2.39755	0.175584	-	-5.91057	3.94021e-41	DN	-5.30148	1.21686e-26	DN	6.88044	0	UP	-4.37487	3.87433e-47	DN	-4.92791	7.00382e-20	DN	-3.28595	1.37088e-19	DN	-2.44775	0.0163427	-	-0.507766	1	-	-2.27794	0.887091	-	-4.25919	0.00216684	DN	-0.106593	1	-
ENSMUSG00000038387	Rras	-2.45665	7.15715e-07	DN	-0.000287607	1	-	-1.29044	0.338185	-	0.643473	3.67711e-05	-	-1.37249	0.356083	-	0.106315	0.794431	-	-0.4365	0.110511	-	-0.0709296	0.974781	-	0.220502	0.313553	-	-0.854381	0.0100448	-	0.122416	0.88396	-	-1.1355	0.231888	-	-1.14675	1	-	-1.72565	0.99328	-	-1.11392	0.511777	-	-0.796742	1	-
ENSMUSG00000004864	Mapk13	-2.4574	1.20015e-06	DN	-0.280976	1	-	-0.297516	1	-	0.259834	0.178583	-	0.935792	0.248414	-	0.5408	0.00769949	-	0.878518	3.83565e-05	-	-2.74005	1.37964e-23	DN	-0.163762	0.548204	-	-0.0457667	1	-	-0.0344655	1	-	-0.421564	0.995787	-	-0.545154	1	-	-0.3422	1	-	-0.50688	1	-	-0.761196	1	-
ENSMUSG00000021477	Ctsl	-2.45784	1.06063e-07	DN	-0.716738	1	-	-0.498601	0.875967	-	0.390389	0.0203844	-	-1.2173	0.329759	-	0.22363	0.367408	-	-0.370194	0.181474	-	0.211866	0.45386	-	0.18686	0.407652	-	-1.46723	1.65371e-06	-	-0.422967	0.187526	-	1.54829	0.000428286	-	0.750507	1	-	-0.724788	1	-	-1.69868	0.073284	-	-1.40243	1	-
ENSMUSG00000000275	Trim25	-2.45971	1.3063e-06	DN	-1.16575	1	-	-0.315468	1	-	-0.362396	0.0587351	-	1.61758	0.0109594	-	1.10236	1.29614e-09	-	2.73254	1.02623e-53	UP	-2.3636	8.52319e-19	DN	-1.88633	3.7884e-21	-	-2.39851	2.53291e-12	DN	-1.78973	2.7277e-11	-	-1.09919	0.279334	-	-2.39877	1	-	-2.10778	0.834516	-	-1.59138	0.217141	-	-1.25951	1	-
ENSMUSG00000051375	Pcdh1	-2.4654	9.91922e-07	DN	-1.14532	1	-	-0.253571	1	-	0.530746	0.00105542	-	0.0163643	1	-	1.09381	1.27512e-09	-	1.24749	7.73485e-10	-	-3.78779	6.06329e-37	DN	-0.427345	0.0342694	-	-1.9367	4.6027e-09	-	-1.57569	2.22293e-09	-	1.22933	0.010438	-	-0.0483582	1	-	-1.03301	1	-	-2.05983	0.0613162	-	-1.49728	1	-
ENSMUSG00000030413	Pglyrp1	-2.46635	4.09735e-06	DN	-0.856505	1	-	-1.5245	0.284615	-	-0.321375	0.126816	-	1.03791	0.213192	-	1.21966	9.69438e-11	-	2.39631	1.39802e-35	UP	-4.45206	1.03935e-42	DN	-1.87238	1.35762e-19	-	-3.92025	5.97974e-23	DN	0.174439	0.763334	-	-1.08211	0.337852	-	-1.62282	1	-	-2.10998	0.952796	-	-3.11083	0.00527658	DN	-1.16211	1	-
ENSMUSG00000016256	Ctsz	-2.46996	8.80411e-07	DN	0.0507064	1	-	0.0126504	1	-	-0.663606	0.000121368	-	-1.45522	0.330899	-	-1.20984	1.07379e-07	-	-2.67696	6.30376e-19	DN	1.65329	2.11198e-20	-	-0.711144	0.000177415	-	0.791341	0.00217593	-	0.996857	1.26109e-06	-	0.446689	0.530837	-	0.856666	1	-	0.907188	0.528671	-	0.107648	1	-	-0.59507	1	-
ENSMUSG00000024014	Pim1	-2.48056	9.9131e-07	DN	-1.56894	1	-	-0.382221	1	-	-0.386418	0.0403543	-	1.55577	0.0174993	-	0.79325	3.16429e-05	-	2.69864	1.99302e-52	UP	-1.39302	2.97866e-08	-	-1.61386	6.07533e-17	-	-2.08291	5.06545e-10	DN	-1.46071	3.48482e-08	-	-1.11624	0.260561	-	-1.95209	1	-	-1.66069	1	-	-0.517943	1	-	-0.964931	1	-
ENSMUSG00000028967	Errfi1	-2.49161	5.32927e-07	DN	-1.02945	1	-	1.00405	0.119638	-	-0.270523	0.180271	-	0.616317	0.462822	-	0.550819	0.00573943	-	1.31539	4.4076e-11	-	-0.77827	0.00140941	-	-1.5466	3.26553e-16	-	-0.25753	0.587778	-	0.429891	0.115675	-	-0.654133	0.681811	-	-1.49121	1	-	1.02358	0.421964	-	1.50947	0.00534418	-	-1.06871	1	-
ENSMUSG00000024030	Abcg1	-2.50157	2.89169e-06	DN	-1.61204	1	-	-1.48475	0.271952	-	-1.27365	1.50954e-12	-	1.85224	0.00114577	-	0.702368	0.000451274	-	3.62034	8.23441e-102	UP	-2.28662	1.79728e-16	DN	-3.30599	5.21161e-45	DN	-2.68763	2.76892e-13	DN	-1.56906	1.45797e-08	-	-0.833513	0.507894	-	-1.16486	1	-	-2.19694	0.795607	-	-1.48724	0.297806	-	-1.24901	1	-
ENSMUSG00000090877	Hspa1b	-2.50732	2.41554e-06	DN	0.431098	1	-	0.0258959	1	-	0.536829	0.00159204	-	0.540783	0.559598	-	0.854267	1.33389e-05	-	-1.00517	0.000368163	-	-1.27948	1.00291e-06	-	-0.0839457	0.857958	-	-1.00282	0.00405627	-	0.107755	0.942939	-	-0.712527	0.659295	-	-1.14919	1	-	-1.03223	1	-	0.867	0.244706	-	-0.23257	1	-
ENSMUSG00000025498	Irf7	-2.51349	8.97522e-07	DN	-0.919629	1	-	-0.961326	0.6019	-	-0.296081	0.142437	-	0.697248	0.403474	-	1.30077	2.44407e-13	-	2.34646	4.12171e-37	UP	-2.16699	2.1509e-16	DN	-2.27401	1.9032e-28	DN	-2.7161	1.10361e-14	DN	-0.047075	1	-	-1.55319	0.079425	-	-1.24065	1	-	-1.32774	1	-	-1.97278	0.0840528	-	-1.80299	1	-
ENSMUSG00000003545	Fosb	-2.51806	4.10805e-07	DN	-1.90129	1	-	1.57876	0.00451366	-	-1.55433	1.00018e-19	-	-2.10644	0.145421	-	-1.10781	5.86167e-07	-	-1.71937	1.83402e-10	-	1.06942	2.57572e-08	-	-1.44357	2.31093e-14	-	2.2223	2.73717e-28	UP	0.281021	0.419147	-	0.448194	0.622784	-	-2.35013	1	-	2.51236	0.000763263	UP	2.24576	2.537e-07	UP	-1.82781	1	-
ENSMUSG00000018821	Avpi1	-2.51851	3.66372e-07	DN	-0.40756	1	-	-1.04121	0.517461	-	0.874621	3.89576e-09	-	-0.94467	0.630229	-	1.03002	1.09507e-08	-	-0.572933	0.0291455	-	-1.13483	2.31849e-06	-	0.246768	0.238159	-	-2.38069	8.08166e-13	DN	-0.753662	0.00493588	-	-1.24436	0.173242	-	-0.93691	1	-	-2.35281	0.679625	-	-2.02047	0.0625313	-	-0.457375	1	-
ENSMUSG00000019929	Dcn	-2.52065	7.38695e-07	DN	-0.472689	1	-	0.264674	0.857117	-	-2.79458	3.67293e-50	DN	-3.15221	0.0181417	-	-3.69295	2.68599e-42	DN	-5.11037	2.80283e-45	DN	2.89052	3.31306e-70	UP	-2.78777	1.85663e-40	DN	0.781745	0.00309686	-	1.78617	5.13007e-22	-	-1.36008	0.145859	-	1.3803	1	-	0.932468	0.506709	-	-1.58173	0.233055	-	-1.94103	1	-
ENSMUSG00000023034	Nr4a1	-2.53739	1.21516e-06	DN	-1.33452	1	-	1.02916	0.122432	-	-2.09181	1.00194e-29	DN	-2.42237	0.102109	-	-2.55429	1.60815e-23	DN	-3.89899	3.89071e-29	DN	0.702837	0.000999325	-	-1.45893	2.11337e-13	-	2.609	8.17856e-40	UP	0.592754	0.0161249	-	-0.477692	0.933321	-	-1.80365	1	-	2.2847	0.00368227	UP	3.46703	2.9081e-23	UP	-1.34288	1	-
ENSMUSG00000025510	Cd151	-2.53744	3.59282e-07	DN	-0.421068	1	-	-0.501923	1	-	0.560231	0.000427122	-	-1.20803	0.439672	-	0.330036	0.141072	-	-1.04078	8.78758e-05	-	-1.05189	1.877e-05	-	0.258861	0.209512	-	-0.357727	0.419788	-	0.145456	0.817664	-	0.985279	0.057718	-	0.147825	1	-	-0.244356	1	-	-0.643582	0.98983	-	-1.03839	1	-
ENSMUSG00000066705	Fxyd6	-2.54173	1.39544e-05	DN	0.314236	1	-	-0.276744	1	-	-3.70701	4.42194e-55	DN	-2.16065	0.203884	-	-3.68964	1.13431e-30	DN	-4.49243	4.73926e-26	DN	0.555527	0.0200937	-	-3.81179	3.12787e-45	DN	4.23022	2.36189e-119	UP	-1.1022	0.00026461	-	-2.72712	0.00437686	DN	0.457543	1	-	1.52429	0.179433	-	3.20751	8.30412e-17	UP	-1.10828	1	-
ENSMUSG00000030095	Tmem43	-2.54851	1.11192e-06	DN	-0.60969	1	-	0.103065	1	-	0.618054	0.000131206	-	-1.41423	0.357159	-	0.118722	0.760269	-	-1.44399	2.58026e-07	-	-0.171953	0.709811	-	0.490236	0.00732587	-	-1.50205	6.85116e-06	-	-0.370705	0.342213	-	1.44598	0.00151705	-	0.796211	1	-	-1.03529	1	-	-2.15454	0.0553983	-	-0.529642	1	-
ENSMUSG00000001156	Mxd1	-2.55167	3.67766e-07	DN	-1.55914	1	-	-1.22387	0.399777	-	-0.272721	0.181253	-	0.526911	0.550766	-	1.7316	6.64766e-25	-	2.67868	5.25532e-52	UP	-3.83707	2.32337e-39	DN	-2.16297	9.00024e-28	DN	-3.40333	3.18607e-21	DN	-3.61365	3.24232e-34	DN	-1.4	0.11937	-	-2.81619	1	-	-2.55199	0.615445	-	-3.17806	0.00165342	DN	-2.81474	1	-
ENSMUSG00000016918	Sulf1	-2.56837	1.63276e-05	DN	-0.547241	1	-	1.3824	0.0304819	-	-2.33064	1.78028e-28	DN	-1.64458	0.330432	-	-3.50846	1.10053e-27	DN	-3.82027	3.24478e-21	DN	1.13404	5.36276e-08	-	-0.611945	0.00581886	-	2.50647	3.34223e-32	UP	0.550483	0.0434849	-	1.17212	0.0349921	-	1.91004	1	-	3.20412	1.21552e-06	UP	-0.464743	1	-	-0.133957	1	-
ENSMUSG00000022965	Ifngr2	-2.57253	2.08166e-07	DN	-0.788724	1	-	-1.10025	0.470376	-	0.117252	0.643104	-	-0.689544	0.884044	-	1.15787	5.63849e-11	-	1.33324	2.01205e-11	-	-0.124288	0.803908	-	-0.872708	2.83587e-06	-	-1.93444	2.32004e-09	-	-0.623705	0.0257098	-	-0.634247	0.697985	-	-1.25202	1	-	-2.22263	0.731271	-	-2.20039	0.036372	-	-1.31534	1	-
ENSMUSG00000001247	Lsr	-2.5755	2.79508e-07	DN	-0.646874	1	-	-0.860614	0.668647	-	0.70104	5.27012e-06	-	-1.54859	0.292825	-	0.529444	0.00877104	-	-0.853452	0.0013352	-	-3.84555	1.00213e-38	DN	0.426902	0.0192386	-	0.0974584	0.93636	-	-0.26518	0.546368	-	0.677238	0.255944	-	-0.335371	1	-	-0.182848	1	-	-0.488012	1	-	-1.52057	1	-
ENSMUSG00000027788	Otol1	-2.57783	1.50688e-06	DN	-0.835564	1	-	-2.09093	0.0889132	-	-4.41636	1.7908e-86	DN	-2.74653	0.0689499	-	-3.7022	8.64605e-39	DN	-3.92709	3.32015e-29	DN	-4.07342	4.90087e-38	DN	-4.87032	1.79467e-78	DN	5.93691	7.36197e-289	UP	-3.56202	6.4962e-30	DN	-3.24872	0.000171704	DN	2.0728	1	-	4.22007	7.48497e-16	UP	-4.25941	0.000134592	DN	-1.10765	1	-
ENSMUSG00000003534	Ddr1	-2.5782	4.05592e-07	DN	-0.710498	1	-	0.214492	0.933104	-	0.567268	0.00040086	-	-0.82486	0.75176	-	0.432432	0.0414228	-	-0.290271	0.38794	-	-1.69498	2.40474e-11	-	0.212364	0.339071	-	-0.751939	0.0293544	-	-0.309799	0.477692	-	1.45197	0.00114439	-	0.421144	1	-	0.03743	1	-	-0.257111	1	-	-0.143743	1	-
ENSMUSG00000030793	Pycard	-2.57843	4.92554e-07	DN	-0.015811	1	-	-0.385973	1	-	0.773949	5.33689e-07	-	-1.04784	0.563873	-	-0.204143	0.512641	-	-1.08308	6.65896e-05	-	-2.20001	8.31129e-17	DN	1.04431	6.96263e-11	-	-1.55764	2.20436e-06	-	0.0035801	1	-	-0.79147	0.531613	-	-0.0271908	1	-	-0.0789174	1	-	-0.926078	0.704676	-	0.326155	1	-
ENSMUSG00000056973	Ces1d	-2.57945	4.60724e-06	DN	-0.771134	1	-	0.286051	0.873361	-	-1.79878	7.45349e-21	-	-2.17219	0.179698	-	-2.10881	1.02024e-15	DN	-3.7007	2.27281e-23	DN	-4.27867	8.50616e-34	DN	-3.23314	3.05971e-40	DN	3.07072	5.99839e-56	UP	2.18535	1.29255e-32	UP	-0.648436	0.741662	-	1.40275	1	-	3.38591	3.56426e-08	UP	1.23342	0.0487221	-	-2.46822	1	-
ENSMUSG00000056313	Tcim	-2.58094	6.44446e-07	DN	-0.294053	1	-	0.600862	0.474616	-	-0.694559	7.32229e-05	-	-1.73516	0.252844	-	-1.68155	1.46161e-12	-	-3.64439	2.26803e-27	DN	0.108584	0.810005	-	0.242788	0.263061	-	1.90486	4.97906e-19	-	0.84998	9.8078e-05	-	0.293815	0.775123	-	-0.524541	1	-	1.46303	0.158246	-	0.603845	0.510488	-	-0.457124	1	-
ENSMUSG00000045817	Zfp36l2	-2.59052	4.26513e-07	DN	-0.20824	1	-	0.245373	0.887094	-	-1.37114	1.44897e-15	-	0.513048	0.575652	-	-1.45652	3.57691e-10	-	0.81518	0.000161501	-	0.208339	0.480542	-	-0.372235	0.0747965	-	1.50162	2.20579e-11	-	0.730084	0.0012186	-	-0.375728	1	-	-0.658321	1	-	1.11402	0.363006	-	1.51423	0.00365114	-	-0.236256	1	-
ENSMUSG00000013076	Amotl1	-2.59785	3.27989e-07	DN	-0.690977	1	-	0.540977	0.536201	-	0.319634	0.079097	-	-2.4275	0.0846728	-	-0.728395	0.00158816	-	-2.58186	8.09576e-18	DN	-0.126472	0.802067	-	0.91241	1.68961e-08	-	-0.142086	0.953869	-	0.102418	0.947377	-	0.737762	0.207733	-	-0.265814	1	-	0.15146	1	-	-0.30103	1	-	-0.602612	1	-
ENSMUSG00000023913	Pla2g7	-2.59881	5.78537e-07	DN	-0.21659	1	-	0.922958	0.180842	-	-3.41207	8.22923e-64	DN	-2.86572	0.041679	-	-3.96343	8.07332e-44	DN	-3.91926	3.87205e-30	DN	-0.470967	0.0804073	-	-1.89202	8.75184e-21	-	3.45988	2.98403e-81	UP	1.32977	1.36914e-11	-	-0.251822	1	-	2.02321	1	-	3.35677	1.66286e-08	UP	1.28608	0.0258877	-	-0.882493	1	-
ENSMUSG00000022037	Clu	-2.60078	3.9003e-08	DN	-0.321637	1	-	0.151898	1	-	0.249243	0.195179	-	-2.59722	0.0570076	-	-0.626772	0.0054637	-	-2.8186	5.7588e-22	DN	-1.90171	1.71057e-14	-	-0.0576033	0.949865	-	1.51906	5.54716e-12	-	0.838601	8.49722e-05	-	1.12803	0.0311342	-	1.59859	1	-	1.33807	0.302311	-	-0.631001	0.837173	-	-1.21435	1	-
ENSMUSG00000006390	Elovl1	-2.60606	3.55347e-07	DN	-0.909714	1	-	-0.336846	1	-	0.283071	0.133513	-	-1.90436	0.196212	-	-0.0403422	1	-	-1.34199	8.75254e-07	-	-0.256421	0.456553	-	0.372299	0.0498727	-	0.754225	0.00424174	-	-0.483206	0.143466	-	1.18028	0.0157042	-	0.868013	1	-	0.874617	0.565016	-	-0.568383	1	-	-0.937672	1	-
ENSMUSG00000031838	Ifi30	-2.6105	6.52187e-07	DN	-0.453909	1	-	0.321221	0.80796	-	-0.0909014	0.805793	-	-1.47333	0.33667	-	-1.01122	1.39342e-05	-	-3.0008	9.86535e-21	DN	0.505448	0.0276636	-	0.481135	0.00832493	-	0.43448	0.14658	-	0.243757	0.500347	-	1.6569	0.00011638	-	1.41313	1	-	0.758615	0.687666	-	0.186667	1	-	-0.404401	1	-
ENSMUSG00000027070	Lrp2	-2.6123	7.12102e-05	DN	0.267529	1	-	3.11532	2.9362e-12	UP	-3.73885	3.427e-45	DN	-1.95256	0.30563	-	-3.70894	4.35738e-25	DN	-3.62814	2.97061e-17	DN	-2.89478	3.51527e-16	DN	-4.23796	7.4213e-41	DN	-0.380902	0.518342	-	1.94382	3.6127e-20	-	-0.985337	0.514783	-	2.34554	1	-	1.62079	0.186553	-	5.45484	8.59673e-76	UP	1.88632	1	-
ENSMUSG00000031722	Hp	-2.6195	0.00625053	DN	-1.24414	1	-	-1.07621	1	-	-2.46894	9.17569e-16	DN	-3.06571	0.368265	-	-2.56339	9.43067e-10	DN	-5.74668	2.66506e-18	DN	3.52233	2.55641e-44	UP	-4.22027	6.04872e-27	DN	-4.95724	3.39457e-12	DN	1.94464	7.55423e-11	-	-1.50838	0.577875	-	1.88084	1	-	-3.30807	1	-	-1.96213	0.728365	-	-1.13672	1	-
ENSMUSG00000029135	Fosl2	-2.6204	4.24657e-07	DN	-0.524751	1	-	0.301701	0.823106	-	-0.378685	0.045646	-	1.91514	0.000384308	-	0.35265	0.115984	-	2.38434	7.49284e-39	UP	-0.991113	9.16678e-05	-	-0.978519	2.49555e-07	-	-2.29094	2.43183e-11	DN	-0.834616	0.00286997	-	-0.222804	1	-	-1.66638	1	-	-1.28132	1	-	-0.651794	1	-	-1.37568	1	-
ENSMUSG00000005087	Cd44	-2.63169	4.4971e-07	DN	-0.367702	1	-	0.0820796	1	-	0.0264936	1	-	-2.0878	0.16347	-	-1.44696	7.71981e-10	-	-4.3075	1.56208e-33	DN	0.274787	0.318057	-	1.63045	1.57051e-26	-	-3.05142	5.3867e-17	DN	-1.80911	3.06263e-11	-	2.60707	1.8774e-13	UP	1.38153	1	-	-1.54399	1	-	-3.21584	0.0022919	DN	-1.0908	1	-
ENSMUSG00000021215	Net1	-2.63781	3.30016e-07	DN	-0.731985	1	-	-0.0296209	1	-	0.0264596	1	-	-0.191182	1	-	0.781288	4.5644e-05	-	1.1645	1.74944e-08	-	-1.30735	2.04739e-07	-	-0.230791	0.336789	-	-0.510816	0.186878	-	-0.315098	0.467829	-	-0.375628	1	-	-1.20469	1	-	0.118292	1	-	0.0683407	1	-	-1.94115	1	-
ENSMUSG00000038375	Trp53inp2	-2.63808	3.17725e-07	DN	-1.51001	1	-	-1.26059	0.385293	-	-0.702962	5.77657e-05	-	0.738648	0.369929	-	1.22684	7.93107e-12	-	3.04528	2.12085e-69	UP	-2.24085	3.21485e-17	DN	-2.54827	6.68031e-34	DN	-1.23908	0.000175062	-	-2.02621	1.04299e-13	DN	-1.66216	0.057718	-	-1.84897	1	-	-0.807099	1	-	-2.00951	0.07919	-	-2.0323	1	-
ENSMUSG00000049313	Sorl1	-2.64129	1.16275e-06	DN	-1.0613	1	-	0.840555	0.255636	-	0.14107	0.580478	-	-1.04781	0.578806	-	0.484309	0.0205341	-	-0.85313	0.0023797	-	-3.04123	3.3253e-24	DN	-1.2608	3.44785e-10	-	1.49757	4.13388e-11	-	0.468724	0.0788223	-	0.827977	0.156031	-	1.08997	1	-	2.08373	0.0137318	-	1.41856	0.0105771	-	0.222844	1	-
ENSMUSG00000051159	Cited1	-2.64551	3.16835e-05	DN	1.18541	1	-	0.555359	0.619299	-	-2.71378	3.34647e-32	DN	-0.443228	1	-	-2.6125	1.652e-17	DN	-3.49017	1.07775e-17	DN	-2.06909	6.19529e-11	DN	-4.12281	9.69026e-43	DN	1.88958	5.74741e-15	-	2.97833	2.38944e-57	UP	-2.07206	0.0531637	-	0.628609	1	-	0.535062	0.984838	-	3.29475	2.19788e-16	UP	-0.696621	1	-
ENSMUSG00000018102	Hist1h2bc	-2.64654	1.13187e-07	DN	-0.559085	1	-	-1.74514	0.138124	-	0.088311	0.775529	-	0.732841	0.432976	-	1.12904	2.48625e-10	-	2.06133	1.97923e-28	UP	-0.828461	0.000679891	-	-1.22655	6.62396e-11	-	-2.4979	8.79849e-14	DN	-1.38875	5.20183e-08	-	-1.8471	0.0253291	-	-1.06879	1	-	-2.37874	0.697498	-	-2.55939	0.0125351	-	-0.967026	1	-
ENSMUSG00000039286	Fndc3b	-2.64687	4.0248e-07	DN	-0.360356	1	-	0.501917	0.589485	-	-0.204154	0.371532	-	-0.868057	0.719418	-	-0.41423	0.105129	-	-1.06407	9.87404e-05	-	1.36515	3.70904e-13	-	-0.150011	0.602226	-	-0.256289	0.665824	-	0.352634	0.264829	-	0.25087	0.847259	-	0.00617686	1	-	0.134326	1	-	-0.360578	1	-	0.384805	1	-
ENSMUSG00000030862	Cpxm2	-2.65086	1.19445e-06	DN	-0.597316	1	-	-0.955855	0.648913	-	-3.91823	3.19895e-70	DN	-2.28151	0.149737	-	-3.62079	8.9698e-36	DN	-3.58645	1.17192e-24	DN	-2.69904	1.07336e-20	DN	-3.96421	7.13835e-57	DN	5.51569	3.92587e-247	UP	-1.8907	2.99297e-11	-	-2.7889	0.00140798	DN	1.98077	1	-	4.12356	3.26034e-15	UP	-1.45494	0.337236	-	-0.546543	1	-
ENSMUSG00000031328	Flna	-2.65585	1.6719e-07	DN	0.0190344	1	-	0.717006	0.341436	-	0.164955	0.458329	-	-1.39188	0.357333	-	-1.52563	3.74114e-11	-	-4.1577	3.62147e-34	DN	0.432102	0.0644625	-	1.09112	3.91211e-12	-	-0.651222	0.0682529	-	-0.192389	0.748474	-	1.37497	0.00270089	-	0.882039	1	-	0.1808	1	-	-0.418906	1	-	0.516965	1	-
ENSMUSG00000019889	Ptprk	-2.66238	6.25357e-07	DN	-0.989017	1	-	1.78929	0.000515375	-	-0.295475	0.145758	-	0.170328	1	-	-0.0622316	1	-	-0.162551	0.779159	-	-0.308708	0.347106	-	-0.408219	0.058394	-	-0.0936261	1	-	0.850367	0.000103016	-	1.37884	0.00333208	-	0.418349	1	-	0.768278	0.697716	-	0.265721	0.980292	-	-0.320747	1	-
ENSMUSG00000017754	Pltp	-2.6658	5.82325e-06	DN	-0.00806532	1	-	-0.106251	1	-	-1.8629	8.29364e-21	-	-1.96836	0.238696	-	-3.90626	5.46757e-33	DN	-4.76522	9.72719e-28	DN	3.43921	9.29841e-92	UP	0.0738018	0.85181	-	-1.59011	1.66692e-05	-	-0.765645	0.0167321	-	0.93621	0.12124	-	1.96574	1	-	-0.152565	1	-	-3.72394	0.00300834	DN	-1.15769	1	-
ENSMUSG00000017723	Wfdc2	-2.67617	1.19541e-08	DN	-0.409869	1	-	-0.629983	0.740293	-	0.667268	1.21132e-05	-	-1.19063	0.343342	-	0.137438	0.660353	-	-1.39302	8.64827e-08	-	-4.28184	1.30818e-50	DN	-0.179743	0.478785	-	0.520179	0.0672765	-	1.03279	2.48094e-07	-	0.509426	0.519804	-	0.532582	1	-	0.423674	1	-	-2.68193	0.00650035	DN	-0.905117	1	-
ENSMUSG00000032369	Plscr1	-2.67679	1.83266e-07	DN	-0.309058	1	-	-0.140547	1	-	0.202701	0.336033	-	-1.27179	0.416993	-	0.167294	0.57612	-	-0.982777	0.000265666	-	-0.959263	0.000131192	-	-0.278684	0.215626	-	-1.20494	0.000230796	-	1.60685	1.066e-17	-	-0.715985	0.609439	-	-0.233214	1	-	-1.11291	1	-	0.924868	0.173083	-	-1.26652	1	-
ENSMUSG00000005148	Klf5	-2.67865	7.42471e-08	DN	-1.02103	1	-	-0.514188	1	-	0.570021	0.000300554	-	-0.365862	1	-	1.079	1.43647e-09	-	0.925206	9.16305e-06	-	-2.68801	3.3977e-24	DN	-0.341333	0.101327	-	-2.00624	6.33145e-10	DN	-0.254074	0.574253	-	-0.385456	1	-	-1.9283	1	-	-1.91745	0.898315	-	-1.24573	0.402528	-	-1.29185	1	-
ENSMUSG00000026970	Rbms1	-2.68618	6.41835e-08	DN	-1.20479	1	-	0.270216	0.84699	-	0.36474	0.0343851	-	-0.841923	0.719418	-	0.218564	0.389482	-	0.068761	0.955671	-	0.116323	0.769199	-	0.260735	0.201539	-	-1.83777	1.05424e-08	-	-0.046203	1	-	0.237645	0.847251	-	-1.0682	1	-	-1.22422	1	-	-2.04202	0.0564715	-	-1.25201	1	-
ENSMUSG00000036885	Arhgef26	-2.69484	1.7116e-05	DN	-0.525247	1	-	2.42509	1.00383e-06	UP	-1.34538	3.28403e-11	-	-1.33995	0.479348	-	-1.35693	5.468e-07	-	-2.64537	3.6188e-13	DN	-3.18661	5.23685e-20	DN	-2.44213	5.1368e-23	DN	1.20885	4.48034e-06	-	2.50284	4.30434e-40	UP	-0.572091	0.893444	-	0.396024	1	-	1.83238	0.0843476	-	3.2142	6.14739e-16	UP	-0.638733	1	-
ENSMUSG00000060802	B2m	-2.69743	4.58361e-08	DN	0.0952982	1	-	-0.319103	1	-	-0.0708221	0.860454	-	-0.308475	1	-	0.16876	0.551199	-	0.0648767	0.966492	-	0.703825	0.000593799	-	-0.314722	0.136668	-	-0.847038	0.00718903	-	0.440036	0.0980882	-	0.241115	0.95552	-	0.629202	1	-	-0.645972	1	-	-0.663902	0.967988	-	-0.891473	1	-
ENSMUSG00000020422	Tns3	-2.70438	5.46415e-07	DN	-0.506539	1	-	0.858875	0.233913	-	-0.945332	1.29022e-07	-	-2.15504	0.161687	-	-2.13098	2.56455e-17	DN	-3.578	6.97151e-25	DN	0.734805	0.000603205	-	-0.826855	3.4673e-05	-	0.835299	0.00119056	-	1.49365	1.72208e-14	-	-0.639388	0.72912	-	0.150692	1	-	1.1681	0.347814	-	3.40097	3.31949e-22	UP	-0.45012	1	-
ENSMUSG00000063632	Sox11	-2.7172	9.10042e-08	DN	-1.29868	1	-	-0.842898	0.690881	-	0.746127	1.2038e-06	-	-2.13249	0.141788	-	-0.0275517	1	-	-2.40923	2.23318e-16	DN	-0.886413	0.000395101	-	0.695032	3.53299e-05	-	1.10341	4.16387e-06	-	-2.08406	8.48817e-15	DN	0.203225	0.910747	-	-0.943233	1	-	0.872732	0.552081	-	-1.55846	0.217498	-	-1.67995	1	-
ENSMUSG00000069662	Marcks	-2.71724	5.94631e-08	DN	-0.338689	1	-	-1.04723	0.515603	-	-0.00864972	1	-	-1.59724	0.273093	-	-1.04021	2.55529e-06	-	-3.01922	4.02214e-23	DN	1.64392	2.51359e-20	-	0.382767	0.0395303	-	-0.869076	0.00864876	-	0.454546	0.0870742	-	-0.47321	0.911754	-	-0.933484	1	-	-1.28623	1	-	-2.4334	0.0184765	-	-1.53265	1	-
ENSMUSG00000003051	Elf3	-2.71778	4.71102e-08	DN	-1.22026	1	-	-1.14526	0.444908	-	0.0207877	1	-	0.85931	0.331706	-	1.41246	1.69919e-16	-	2.40116	5.67967e-41	UP	-4.18575	4.01189e-46	DN	-2.16806	1.49259e-28	DN	-2.14116	5.41989e-11	DN	-1.11894	1.0908e-05	-	-1.66969	0.0464483	-	-2.01567	1	-	-1.85383	0.945581	-	-1.64802	0.171796	-	-2.09936	1	-
ENSMUSG00000031490	Eif4ebp1	-2.71913	5.46745e-08	DN	0.387324	1	-	-0.975857	0.576284	-	0.541827	0.000687955	-	0.333537	0.790031	-	0.0470424	1	-	0.146144	0.672117	-	0.297835	0.24374	-	0.388052	0.0356708	-	-2.42155	3.56725e-13	DN	-0.71071	0.00879003	-	-1.01958	0.312236	-	-0.674365	1	-	-1.77368	0.979823	-	-2.09966	0.0500506	-	-0.472167	1	-
ENSMUSG00000025473	Adam8	-2.7274	2.62957e-07	DN	-0.891362	1	-	0.357275	0.759947	-	1.22165	1.80363e-16	-	-1.03189	0.592025	-	0.459111	0.0335929	-	-1.91996	4.48259e-11	-	-3.57216	3.33869e-32	DN	0.49367	0.00730047	-	-3.27272	2.79575e-18	DN	-1.30784	1.40874e-06	-	1.97336	8.35463e-07	-	0.38392	1	-	-2.69652	0.585168	-	-2.56631	0.0191956	-	-0.202923	1	-
ENSMUSG00000020846	Rflnb	-2.73587	2.05131e-07	DN	0.0678664	1	-	-0.384164	1	-	-1.42761	3.80975e-16	-	-2.34844	0.114587	-	-2.73971	2.48986e-26	DN	-4.04506	4.44378e-31	DN	-1.07023	2.97563e-05	-	0.147476	0.578615	-	3.27355	1.76349e-69	UP	0.16778	0.766552	-	-0.788767	0.554016	-	-0.482327	1	-	1.99451	0.0205519	-	1.61089	0.00181204	-	-1.23824	1	-
ENSMUSG00000046718	Bst2	-2.73609	5.27094e-08	DN	0.0745066	1	-	-0.141964	1	-	-0.265959	0.192305	-	-1.31085	0.393068	-	0.0612972	0.961343	-	-0.881721	0.000659068	-	0.913313	3.92804e-06	-	-1.4028	1.18731e-13	-	0.17678	0.711188	-	1.39022	3.24609e-13	-	-0.380227	1	-	1.13364	1	-	0.121393	1	-	-0.768497	0.866027	-	-1.25537	1	-
ENSMUSG00000053931	Cnn3	-2.74729	3.34872e-08	DN	0.0509604	1	-	-0.534408	0.991456	-	0.358646	0.0380543	-	-2.22979	0.110277	-	-0.628647	0.00493792	-	-3.13355	8.27137e-25	DN	-0.577865	0.0209617	-	0.860434	7.42646e-08	-	0.824917	0.00105409	-	-0.0755499	1	-	-0.590291	0.752511	-	-0.34347	1	-	-0.0867984	1	-	0.70487	0.363969	-	-0.636825	1	-
ENSMUSG00000073411	H2-D1	-2.76583	2.13051e-08	DN	-0.896413	1	-	-0.196185	1	-	0.0482681	0.932776	-	-0.220838	1	-	1.08025	1.05502e-09	-	1.23885	5.04409e-10	-	-1.40848	3.9596e-09	-	-1.08539	4.13089e-09	-	-0.973216	0.00171476	-	0.159958	0.767747	-	0.638618	0.349357	-	0.432159	1	-	-0.631452	1	-	-1.3976	0.296334	-	-1.2229	1	-
ENSMUSG00000001700	Gramd3	-2.76607	2.71907e-07	DN	-1.2308	1	-	-0.950474	0.620086	-	-0.381606	0.0495934	-	-0.0855904	1	-	1.19403	7.50417e-11	-	2.38431	3.17281e-37	UP	-1.90043	9.27003e-13	-	-1.62096	9.16973e-16	-	-1.84015	7.24704e-08	-	-0.228847	0.708285	-	-1.5442	0.0901714	-	-1.10191	1	-	-1.5481	1	-	-0.935386	0.71193	-	-1.37885	1	-
ENSMUSG00000024190	Dusp1	-2.7683	2.85503e-08	DN	-1.57951	1	-	-0.539791	0.993559	-	0.21314	0.29092	-	0.715233	0.448397	-	0.754196	6.30045e-05	-	1.71789	2.70666e-19	-	-0.586172	0.0195636	-	-1.26106	1.464e-11	-	-0.900887	0.0042942	-	-0.565526	0.0497159	-	-0.903201	0.409622	-	-1.90308	1	-	-1.30286	1	-	-0.982071	0.639185	-	-1.63305	1	-
ENSMUSG00000044786	Zfp36	-2.76863	2.88141e-08	DN	-1.14891	1	-	0.0591301	1	-	-0.982777	4.21263e-09	-	0.738136	0.357159	-	0.364859	0.0911015	-	1.237	6.21039e-10	-	0.619075	0.00335299	-	-2.18746	3.48622e-29	DN	1.24339	5.6218e-08	-	-0.0813586	1	-	-1.2674	0.160415	-	-1.31612	1	-	0.767518	0.646779	-	1.25682	0.0372965	-	-1.928	1	-
ENSMUSG00000027111	Itga6	-2.76916	6.34526e-08	DN	-0.683101	1	-	0.472776	0.613039	-	0.410052	0.0168578	-	-2.38416	0.0924449	-	-0.799654	0.000369117	-	-3.11371	2.40292e-23	DN	-3.2151	4.29167e-30	DN	1.53566	3.00904e-24	-	-1.71572	1.53114e-07	-	-0.330258	0.383277	-	2.21058	5.84658e-09	UP	0.612445	1	-	-1.2187	1	-	-0.842664	0.785409	-	-0.490151	1	-
ENSMUSG00000039457	Ppl	-2.77766	6.72082e-08	DN	-1.27195	1	-	-0.644483	0.884638	-	0.410822	0.0167049	-	0.528493	0.55663	-	1.25792	1.21972e-12	-	1.486	7.14205e-14	-	-4.03846	4.58831e-40	DN	-0.77588	4.4407e-05	-	-1.4766	5.63495e-06	-	-0.979227	0.000262737	-	-0.38572	1	-	-0.954229	1	-	-1.37224	1	-	-0.525919	1	-	-1.3188	1	-
ENSMUSG00000070047	Fat1	-2.78821	5.5898e-08	DN	-0.71944	1	-	0.831662	0.234323	-	0.0873489	0.783924	-	-1.60932	0.277416	-	-0.495021	0.0341701	-	-2.41265	2.69238e-16	DN	0.372446	0.12688	-	0.540571	0.0019655	-	-0.596804	0.102796	-	0.106508	0.932636	-	1.75313	2.07535e-05	-	1.32381	1	-	0.0109911	1	-	-0.085902	1	-	0.648571	1	-
ENSMUSG00000020644	Id2	-2.78826	7.02598e-08	DN	-0.953771	1	-	-0.649784	0.888329	-	0.185701	0.395904	-	-0.308898	1	-	0.794035	3.2555e-05	-	0.641439	0.00423214	-	-0.987687	8.82249e-05	-	-1.3328	3.09562e-12	-	1.35594	4.02177e-09	-	-0.748244	0.00642137	-	-1.64697	0.0585758	-	-0.93896	1	-	0.0352487	1	-	1.26147	0.0275987	-	-0.938337	1	-
ENSMUSG00000003032	Klf4	-2.79068	3.08126e-08	DN	-1.28676	1	-	0.289317	0.827878	-	-0.067393	0.877739	-	-1.03422	0.559619	-	0.563224	0.00458841	-	-0.555258	0.0351781	-	0.413676	0.0777289	-	-0.398471	0.0491055	-	0.788089	0.00213136	-	-0.209832	0.697623	-	-0.119395	1	-	-1.20918	1	-	0.266408	1	-	0.445278	0.697508	-	-1.6071	1	-
ENSMUSG00000025481	Urah	-2.79114	3.9567e-08	DN	0.0570771	1	-	-1.10525	0.475157	-	0.966902	5.69563e-11	-	-0.805527	0.769417	-	0.79061	2.84092e-05	-	-0.758539	0.0047082	-	-4.26256	1.89642e-44	DN	0.616612	0.000294018	-	-3.08164	2.2099e-18	DN	-0.463578	0.142934	-	-1.05981	0.288957	-	-0.592723	1	-	-2.49274	0.62096	-	-0.605718	1	-	-0.238842	1	-
ENSMUSG00000022443	Myh9	-2.79974	2.14617e-08	DN	-0.0815526	1	-	-0.392135	1	-	0.519602	0.00120121	-	-1.18164	0.456488	-	-0.672727	0.0025787	-	-2.18418	1.16175e-14	DN	0.10417	0.81256	-	1.01688	8.90802e-11	-	-1.35441	2.10206e-05	-	-0.266692	0.536649	-	0.731791	0.25621	-	-0.00715282	1	-	-1.15773	1	-	-0.815001	0.800632	-	-0.59151	1	-
ENSMUSG00000032359	Ctsh	-2.80295	2.66738e-08	DN	-0.54423	1	-	0.128164	1	-	-0.0319862	1	-	-0.803229	0.76859	-	0.133264	0.684566	-	0.569461	0.0109836	-	-2.008	2.5833e-15	DN	-0.308183	0.1507	-	-1.37005	1.85957e-05	-	1.26762	5.90675e-11	-	1.24411	0.0126211	-	0.88581	1	-	-0.677655	1	-	0.250499	0.970459	-	-2.0074	1	-
ENSMUSG00000029149	Krtcap3	-2.80872	6.12184e-08	DN	-0.384128	1	-	0.556507	0.517461	-	0.458015	0.00622357	-	-0.428654	1	-	0.428138	0.0442809	-	-0.369168	0.228914	-	-4.18423	4.72488e-41	DN	0.356776	0.0625978	-	-0.792415	0.0208354	-	0.190462	0.695238	-	1.37603	0.00273703	-	0.378772	1	-	-0.0527278	1	-	-0.620367	1	-	-1.11082	1	-
ENSMUSG00000037820	Tgm2	-2.81037	8.08044e-08	DN	-0.101214	1	-	-0.195858	1	-	0.558857	0.000602958	-	-1.85706	0.210841	-	0.10536	0.807918	-	-2.85871	5.09628e-20	DN	-0.230732	0.488896	-	-0.0537922	0.9705	-	-0.440822	0.287855	-	0.916075	1.84042e-05	-	-0.130829	1	-	-0.89934	1	-	-0.791336	1	-	0.18909	1	-	-0.208106	1	-
ENSMUSG00000025278	Flnb	-2.81894	4.011e-08	DN	-0.267466	1	-	0.452689	0.630911	-	0.704461	5.39588e-06	-	-1.22865	0.439754	-	-0.144232	0.709166	-	-2.90841	2.73451e-21	DN	-0.735179	0.00301908	-	1.00351	3.0674e-10	-	-1.79064	4.60398e-08	-	-1.14881	1.37849e-05	-	1.74566	4.56294e-05	-	0.457119	1	-	-0.624903	1	-	-1.0672	0.568317	-	-0.383467	1	-
ENSMUSG00000001794	Capns1	-2.82139	9.91256e-09	DN	-0.00800213	1	-	-0.813956	0.702205	-	0.529682	0.000776129	-	-0.852122	0.706537	-	0.787123	2.01824e-05	-	0.0602044	0.983329	-	-0.802632	0.000781316	-	-0.252479	0.257662	-	-0.208377	0.702991	-	-0.316714	0.396238	-	-0.619806	0.575826	-	-0.608218	1	-	-0.779773	1	-	0.0508455	1	-	-1.65863	1	-
ENSMUSG00000029552	Tes	-2.82596	7.93607e-08	DN	-0.0654876	1	-	0.364705	0.7468	-	0.352314	0.0497251	-	-1.50606	0.317194	-	-0.552659	0.0217078	-	-2.86121	6.85557e-20	DN	-0.263904	0.44286	-	0.611781	0.000418785	-	0.0291143	1	-	0.161101	0.740598	-	0.0112137	1	-	-1.17088	1	-	0.696011	0.74177	-	1.73256	0.000388004	-	-1.76983	1	-
ENSMUSG00000038400	Pmepa1	-2.82763	1.40091e-08	DN	-0.530649	1	-	-0.772438	0.749965	-	0.267599	0.152124	-	-1.51348	0.299784	-	-0.0611819	1	-	-1.24736	1.49842e-06	-	1.06237	2.44094e-08	-	0.522717	0.00251713	-	-2.34331	9.61232e-13	DN	-0.303789	0.437338	-	0.0842566	1	-	-0.277169	1	-	-2.01096	0.848659	-	-1.03566	0.580576	-	-1.18877	1	-
ENSMUSG00000033386	Frrs1	-2.82934	5.00854e-08	DN	-0.993549	1	-	0.547042	0.532141	-	0.245959	0.211706	-	-1.15689	0.478218	-	-0.678577	0.00348119	-	-1.47336	8.34125e-08	-	-0.930055	0.00020635	-	1.08893	5.97307e-12	-	-1.57754	1.38106e-06	-	0.254059	0.503716	-	1.77103	1.54293e-05	-	0.447774	1	-	-0.936963	1	-	-0.706045	0.920786	-	-0.819487	1	-
ENSMUSG00000017466	Timp2	-2.83659	8.87628e-09	DN	-0.288223	1	-	-1.05183	0.501704	-	0.36331	0.0333596	-	-0.777214	0.788166	-	0.55587	0.0045436	-	0.617877	0.00456176	-	0.135778	0.695474	-	-0.360993	0.0755128	-	-0.520929	0.130636	-	-0.887974	0.000533259	-	0.664504	0.317933	-	0.195921	1	-	-0.711201	1	-	-1.99187	0.0618805	-	-1.38999	1	-
ENSMUSG00000018604	Tbx3	-2.84486	2.47234e-05	DN	-0.233969	1	-	1.65291	0.00861725	-	-2.78295	5.40074e-31	DN	-0.892719	0.822342	-	-3.17152	1.10548e-20	DN	-3.18321	8.75802e-15	DN	0.412701	0.142376	-	-2.25257	1.0879e-18	DN	-0.463815	0.368982	-	1.74963	1.59398e-16	-	-1.70191	0.128272	-	-0.224562	1	-	-0.0824213	1	-	5.21181	1.90241e-68	UP	-0.0870108	1	-
ENSMUSG00000026051	Ecrg4	-2.8449	1.91503e-07	DN	-0.400507	1	-	-1.66676	0.225189	-	-4.01991	2.1692e-79	DN	-2.24621	0.161687	-	-3.85496	1.97735e-41	DN	-3.34974	9.07635e-24	DN	-3.91582	1.12711e-36	DN	-4.18504	8.92432e-68	DN	6.09679	1.6878e-297	UP	-3.68937	9.53785e-32	DN	-3.27061	0.000164939	DN	2.01438	1	-	3.62296	1.97975e-09	UP	-3.39419	0.0022465	DN	-0.635351	1	-
ENSMUSG00000025511	Tspan4	-2.85268	4.90175e-07	DN	-0.483947	1	-	0.318857	0.835152	-	-1.90858	1.12893e-23	-	-2.1098	0.177371	-	-3.32561	6.90707e-30	DN	-3.84774	1.43749e-24	DN	3.20207	6.48428e-84	UP	-1.12452	2.93353e-08	-	-0.458087	0.282483	-	0.802935	0.000343962	-	-0.692494	0.657376	-	0.853917	1	-	-0.649662	1	-	1.25372	0.0391786	-	-0.597807	1	-
ENSMUSG00000024197	Plin3	-2.86652	3.03648e-08	DN	-0.466799	1	-	-0.463092	1	-	0.34264	0.054767	-	-1.37461	0.359929	-	0.377685	0.0840259	-	-0.7911	0.00327487	-	-0.210196	0.541857	-	-0.172811	0.5177	-	0.345568	0.265865	-	0.277615	0.437585	-	-0.933016	0.384021	-	-0.9553	1	-	-0.721449	1	-	1.00323	0.118103	-	-0.553827	1	-
ENSMUSG00000031827	Cotl1	-2.86939	3.68219e-08	DN	0.566494	1	-	-0.581903	0.956529	-	0.478305	0.00421212	-	-1.05849	0.554387	-	-0.310496	0.237497	-	-2.7127	6.31664e-19	DN	-2.0232	7.97508e-15	DN	1.8702	2.04114e-36	-	-1.60031	1.12019e-06	-	-1.4846	2.22212e-08	-	0.0301136	1	-	-0.224734	1	-	-1.25682	1	-	-1.94255	0.0911792	-	0.176195	1	-
ENSMUSG00000007872	Id3	-2.87055	6.35848e-08	DN	-0.493138	1	-	0.143624	1	-	-1.62659	3.94807e-20	-	-2.00533	0.189562	-	-2.74577	1.66532e-26	DN	-3.96795	1.40172e-30	DN	2.62334	4.81272e-55	UP	-1.29775	2.296e-11	-	1.26184	1.16471e-07	-	0.126138	0.88396	-	-1.99338	0.0203063	-	-1.1123	1	-	-0.177479	1	-	2.74102	9.83292e-12	UP	-0.899915	1	-
ENSMUSG00000040447	Spns2	-2.87499	2.37007e-08	DN	-1.74514	1	-	-1.11236	0.478269	-	-0.223446	0.303131	-	1.39039	0.0514896	-	1.48078	8.72115e-18	-	2.80189	7.51967e-58	UP	-3.83399	1.99908e-38	DN	-2.84804	2.45937e-41	DN	-3.26623	1.10789e-19	DN	-2.57224	2.0519e-20	DN	-1.31719	0.149046	-	-1.61422	1	-	-3.06167	0.417777	-	-2.06089	0.0625313	-	-1.47561	1	-
ENSMUSG00000041607	Mbp	-2.88079	5.90174e-08	DN	-1.1325	1	-	-0.131486	1	-	0.134123	0.592912	-	0.808302	0.325682	-	0.679531	0.000560446	-	1.74554	4.10899e-19	-	-3.69589	9.42979e-34	DN	-1.06378	4.10778e-08	-	-0.761056	0.0293489	-	0.348824	0.27286	-	-0.956285	0.380015	-	-2.02831	1	-	-0.793614	1	-	-0.497028	1	-	-0.889041	1	-
ENSMUSG00000067818	Myl9	-2.88306	9.56561e-07	DN	0.844533	1	-	-0.838972	0.77611	-	-2.54031	1.48318e-34	DN	-1.87114	0.26528	-	-4.1555	8.0544e-37	DN	-4.24592	3.67692e-26	DN	2.73021	4.21046e-54	UP	-1.25021	3.77822e-09	-	2.87285	1.12293e-44	UP	-2.47775	1.93814e-15	DN	-1.66306	0.0955857	-	-1.26435	1	-	0.43542	1	-	-1.61641	0.283192	-	-0.447341	1	-
ENSMUSG00000021701	Plk2	-2.88473	4.09314e-08	DN	-0.305742	1	-	0.911219	0.183946	-	-0.0494158	0.963323	-	0.753231	0.35973	-	-0.382385	0.12494	-	-0.222945	0.583029	-	0.462532	0.0470242	-	0.359978	0.0621553	-	-1.04798	0.00172024	-	0.129748	0.870293	-	0.0859936	1	-	-0.316932	1	-	-0.516432	1	-	0.573312	0.547025	-	-0.612651	1	-
ENSMUSG00000027333	Smox	-2.89487	3.76575e-08	DN	-0.808003	1	-	-0.575318	0.964692	-	0.151149	0.525654	-	0.870926	0.288535	-	0.699432	0.000356102	-	1.9491	2.73528e-24	-	-2.09174	1.94473e-15	DN	-0.302137	0.172983	-	-2.15984	2.04284e-10	DN	-0.892252	0.00121322	-	-1.00737	0.338321	-	-1.48934	1	-	-2.81119	0.513618	-	-2.32932	0.0326696	-	-0.809892	1	-
ENSMUSG00000032479	Map4	-2.89712	1.65584e-08	DN	-0.326341	1	-	0.123948	1	-	0.215193	0.289656	-	0.455586	0.633495	-	0.649567	0.000843998	-	1.36382	7.90964e-12	-	-0.778433	0.00146665	-	-0.144514	0.613904	-	-1.42592	9.90416e-06	-	-1.46179	2.19545e-08	-	0.338286	0.695062	-	-0.643094	1	-	-0.591388	1	-	-1.61714	0.189125	-	-2.20644	1	-
ENSMUSG00000045672	Col27a1	-2.9027	1.21321e-05	DN	-1.03583	1	-	1.35036	0.0522195	-	-3.7653	8.23014e-47	DN	-2.39492	0.2032	-	-3.34712	5.23225e-23	DN	-3.65423	8.02908e-18	DN	-0.213429	0.67594	-	-3.24809	1.99129e-31	DN	4.22299	1.09388e-110	UP	-2.38117	5.78056e-12	DN	-1.53972	0.182549	-	-0.282267	1	-	5.07728	3.75378e-26	UP	1.2237	0.0847682	-	-1.46757	1	-
ENSMUSG00000039114	Nrn1	-2.91455	1.19256e-05	DN	-0.129213	1	-	-1.63757	0.340647	-	-2.74704	1.26355e-31	DN	-2.54461	0.183783	-	-3.59913	4.0554e-25	DN	-3.80458	1.09193e-18	DN	5.79644	3.88005e-232	UP	-3.09621	1.10059e-29	DN	-2.78176	4.01257e-10	DN	-3.48535	1.82872e-19	DN	-1.99142	0.0707806	-	-0.168264	1	-	-0.784119	1	-	-5.18401	0.00100507	DN	-1.61693	1	-
ENSMUSG00000026421	Csrp1	-2.91616	2.41932e-08	DN	0.236766	1	-	0.154165	1	-	-0.0684229	0.876801	-	-0.983336	0.612502	-	-0.279486	0.300046	-	-0.498787	0.0811253	-	0.190067	0.538667	-	0.0297816	1	-	0.48785	0.103793	-	0.0994872	0.955631	-	-0.876163	0.447509	-	-0.56474	1	-	-0.0285759	1	-	2.16657	6.94923e-07	UP	0.0211226	1	-
ENSMUSG00000079484	Phyhd1	-2.91834	3.01342e-07	DN	0.418187	1	-	0.565225	0.544817	-	-0.618918	0.00101364	-	-1.67095	0.292769	-	-1.35668	3.25895e-08	-	-3.55063	8.66272e-23	DN	0.496311	0.0323384	-	-0.447734	0.0410177	-	2.28064	1.76117e-27	UP	0.335666	0.298114	-	-0.665191	0.705936	-	0.627044	1	-	2.15538	0.0104638	-	1.30429	0.028058	-	-0.408424	1	-
ENSMUSG00000034382	AI661453	-2.93138	3.20316e-08	DN	-1.49333	1	-	-0.825709	0.717523	-	-0.0308727	1	-	1.59595	0.0132651	-	1.26348	1.47585e-12	-	2.59596	3.41412e-47	UP	-4.11061	2.9658e-39	DN	-2.13185	2.15435e-25	DN	-2.41625	3.0807e-12	DN	-1.98365	3.76212e-13	-	-0.995368	0.348805	-	-1.5691	1	-	-1.86332	0.947114	-	-1.84024	0.123421	-	-2.0157	1	-
ENSMUSG00000021749	Oit1	-2.94152	2.12081e-08	DN	-1.27764	1	-	-0.722258	0.812638	-	0.7374	2.17644e-06	-	-0.820052	0.764193	-	1.88679	2.34408e-29	-	0.623803	0.00584691	-	-4.69766	1.32382e-46	DN	-0.983457	2.5388e-07	-	-3.90996	5.92082e-24	DN	-1.19711	6.5898e-06	-	0.340716	0.699499	-	-1.52445	1	-	-2.17761	0.78122	-	-3.3666	0.00115773	DN	-1.12271	1	-
ENSMUSG00000096956	Snhg18	-2.94224	3.99502e-08	DN	0.537563	1	-	-0.925531	0.638971	-	-1.40256	2.24961e-15	-	-1.44974	0.34423	-	-2.08886	1.86715e-17	DN	-2.80381	4.31713e-19	DN	2.90064	2.95191e-70	UP	-1.04495	8.74218e-08	-	0.579803	0.0361472	-	0.416023	0.152541	-	-2.29995	0.00599578	DN	-0.0454094	1	-	-0.692979	1	-	0.824978	0.269446	-	-1.84812	1	-
ENSMUSG00000009487	Otog	-2.9459	7.76128e-05	DN	-0.660872	1	-	-0.564075	1	-	-3.42608	2.84413e-34	DN	-1.96262	0.33877	-	-3.31164	1.46646e-18	DN	-3.96231	9.86893e-16	DN	-2.74514	6.83185e-13	DN	-4.24809	9.63944e-34	DN	5.18738	1.00449e-142	UP	-3.22424	1.91436e-14	DN	-2.04151	0.102195	-	1.68426	1	-	4.9788	6.30568e-22	UP	-2.75318	0.0987692	-	0.227863	1	-
ENSMUSG00000035498	Cdcp1	-2.94949	3.55826e-08	DN	-1.01116	1	-	0.995196	0.137102	-	0.349287	0.0523574	-	-0.858804	0.723023	-	0.5758	0.0044927	-	-0.349685	0.270674	-	-3.81385	5.38045e-35	DN	0.542362	0.0022124	-	-1.39217	2.61849e-05	-	-0.459909	0.181563	-	2.03547	1.6296e-07	UP	-0.124942	1	-	0.356728	1	-	-1.24066	0.433913	-	-0.42857	1	-
ENSMUSG00000032068	Plet1	-2.95191	8.35799e-09	DN	-1.96798	1	-	-1.38388	0.300685	-	-0.281251	0.165103	-	0.277795	0.860932	-	1.34719	1.41851e-14	-	2.79752	1.60487e-57	UP	-4.48768	3.68358e-49	DN	-1.74383	2.10752e-19	-	-2.71414	2.24639e-15	DN	-2.29078	7.77036e-18	DN	-0.00313686	1	-	-1.07681	1	-	-2.08502	0.848138	-	-3.38898	0.0007725	DN	-2.38656	1	-
ENSMUSG00000030536	Iqgap1	-2.95402	4.73895e-09	DN	-0.812678	1	-	0.382257	0.708211	-	0.193451	0.351414	-	-1.17328	0.45853	-	0.194855	0.461266	-	-0.728521	0.00454395	-	0.198544	0.496968	-	0.182899	0.423819	-	-0.189278	0.759516	-	-0.110335	0.961817	-	0.685202	0.241907	-	-0.203544	1	-	0.204947	1	-	0.160583	1	-	-0.896854	1	-
ENSMUSG00000008540	Mgst1	-2.96107	1.2788e-08	DN	0.262369	1	-	1.62133	0.0022532	-	-2.78912	2.57304e-49	DN	-1.61012	0.28377	-	-3.37625	3.35576e-37	DN	-4.16355	4.08752e-34	DN	0.368824	0.132964	-	-2.93866	5.68424e-43	DN	1.22584	1.61366e-07	-	2.5657	2.74037e-52	UP	-0.854483	0.469622	-	1.51774	1	-	0.884419	0.544169	-	3.44971	1.1492e-23	UP	-0.150301	1	-
ENSMUSG00000021795	Sftpd	-2.97149	6.31911e-07	DN	-0.474018	1	-	1.12498	0.110316	-	-0.926558	1.45267e-06	-	-2.2704	0.191374	-	-2.2624	1.47461e-16	DN	-4.36425	6.67497e-28	DN	-3.70067	1.90756e-28	DN	-2.58738	2.87011e-28	DN	0.2121	0.609783	-	3.86981	1.72542e-111	UP	-1.05381	0.407419	-	1.65856	1	-	0.856916	0.63481	-	0.305105	0.926399	-	-0.535457	1	-
ENSMUSG00000086554	9530034E10Rik	-2.97931	1.88174e-07	DN	-1.70071	1	-	-1.62588	0.225262	-	-0.340918	0.105818	-	-0.158924	1	-	1.96019	2.03198e-28	-	2.6906	1.36841e-45	UP	-2.73498	3.51573e-20	DN	-3.12516	1.46787e-39	DN	-3.71582	6.2845e-19	DN	-3.87135	2.19692e-29	DN	-2.03409	0.0251216	-	-2.68314	1	-	-1.39079	1	-	-3.52473	0.00225739	DN	-1.54387	1	-
ENSMUSG00000032135	Mcam	-2.98137	6.88746e-07	DN	-0.596058	1	-	0.98424	0.181429	-	-0.612734	0.00176168	-	-1.73398	0.293571	-	-3.77848	5.52565e-32	DN	-4.90216	2.34042e-28	DN	-1.83253	1.52547e-10	-	1.87679	5.26717e-32	-	-1.59237	1.35058e-05	-	0.526709	0.0525621	-	2.85883	4.01344e-16	UP	2.01481	1	-	-1.19975	1	-	-1.50399	0.340433	-	-0.44567	1	-
ENSMUSG00000047407	Tgif1	-2.98213	1.14718e-08	DN	-0.639033	1	-	0.118638	1	-	0.727163	2.59945e-06	-	-1.30289	0.399443	-	-0.00337775	1	-	-3.24125	2.59034e-24	DN	-1.54486	8.26853e-10	-	0.546236	0.00185636	-	-0.876695	0.00908114	-	0.777602	0.000445076	-	0.0459752	1	-	-1.39286	1	-	-0.836926	1	-	-0.345885	1	-	-0.83907	1	-
ENSMUSG00000024379	Tslp	-2.98228	0.000129242	DN	0.679912	1	-	-0.442871	1	-	-0.170232	0.668123	-	-1.80921	0.53487	-	-3.07171	3.93126e-17	DN	-3.68932	1.56494e-15	DN	-3.78776	1.42902e-19	DN	2.66771	2.36312e-41	UP	-3.80853	1.92487e-12	DN	-1.46136	0.000208276	-	2.37556	1.11704e-05	UP	-0.361675	1	-	-2.13197	1	-	-3.5277	0.0640764	-	-0.73901	1	-
ENSMUSG00000027800	Tm4sf1	-2.98586	6.86496e-09	DN	-0.28513	1	-	-0.402845	1	-	-0.265369	0.196775	-	-2.532	0.0689499	-	-1.86545	6.67471e-16	-	-4.01569	1.6466e-33	DN	1.55325	1.03117e-17	-	0.193584	0.399963	-	1.31073	1.24277e-08	-	-0.590501	0.0410839	-	1.07153	0.0493557	-	0.947997	1	-	1.2985	0.233236	-	-1.8441	0.112275	-	-0.908837	1	-
ENSMUSG00000050335	Lgals3	-2.99025	2.48715e-09	DN	-0.346751	1	-	-1.58454	0.184305	-	0.35308	0.0418519	-	1.25799	0.114541	-	1.0546	3.37535e-09	-	1.89976	3.61424e-24	-	-2.28054	1.38521e-19	DN	-0.986345	1.01533e-07	-	-3.88517	4.98908e-27	DN	-0.800175	0.00236652	-	-1.81633	0.0258196	-	-1.26036	1	-	-2.32564	0.703042	-	-3.5229	0.000301079	DN	-1.05776	1	-
ENSMUSG00000039899	Fgl2	-2.99366	4.17165e-05	DN	-0.50533	1	-	-2.8459	0.0880942	-	-6.04951	5.13859e-63	DN	-4.07315	0.0636499	-	-4.77205	3.65407e-29	DN	-5.75289	3.39702e-23	DN	7.02682	5.3942e-269	UP	-4.23895	2.71589e-37	DN	-5.05676	1.35365e-16	DN	-2.67902	3.20374e-12	DN	-4.63961	0.000488403	DN	0.7682	1	-	-2.14331	1	-	-4.12462	0.0119353	-	0.0280379	1	-
ENSMUSG00000068566	Myadm	-2.99399	7.67715e-09	DN	-1.28516	1	-	-0.485594	1	-	0.496964	0.00247884	-	-1.27767	0.406897	-	0.474526	0.022218	-	-0.41064	0.162997	-	0.207471	0.480179	-	0.243544	0.252756	-	-1.0304	0.00161874	-	-1.01578	0.000128782	-	0.925468	0.0836778	-	-0.109709	1	-	-0.45601	1	-	-1.32913	0.349903	-	-0.847612	1	-
ENSMUSG00000028173	Wls	-3.01422	2.71449e-09	DN	-0.354717	1	-	0.717467	0.331626	-	-0.104288	0.732496	-	-1.93146	0.178284	-	-0.848492	0.000111827	-	-2.79912	4.371e-21	DN	0.0585537	0.960437	-	0.532874	0.00197666	-	0.0933507	0.942357	-	0.65714	0.00387921	-	1.77351	1.99135e-05	-	0.987096	1	-	0.831899	0.580412	-	-0.197079	1	-	-0.927302	1	-
ENSMUSG00000001435	Col18a1	-3.01451	1.51083e-08	DN	-0.0551111	1	-	0.459654	0.630911	-	-0.765382	1.08577e-05	-	-2.27142	0.125238	-	-2.95479	9.26881e-30	DN	-4.36527	2.37917e-34	DN	0.865924	2.14756e-05	-	1.214	1.21247e-14	-	0.420364	0.185241	-	-0.71739	0.0135947	-	2.49027	4.4519e-12	UP	2.21599	1	-	1.24889	0.277029	-	-2.63567	0.0137637	-	0.394273	1	-
ENSMUSG00000033730	Egr3	-3.01651	4.37919e-06	DN	-1.44705	1	-	1.33537	0.0484731	-	-2.87133	6.82891e-35	DN	-2.94244	0.104904	-	-3.4088	2.13825e-24	DN	-4.29741	1.82436e-21	DN	1.40226	1.84604e-11	-	-1.08889	1.48679e-06	-	2.13954	1.48589e-20	UP	0.0562527	1	-	-1.10502	0.381604	-	-0.98181	1	-	2.88472	0.000112391	UP	3.88826	5.502e-28	UP	-1.42886	1	-
ENSMUSG00000029070	Mxra8	-3.01705	3.34459e-07	DN	-0.940421	1	-	0.682377	0.433611	-	-3.40852	2.80177e-52	DN	-1.76967	0.273534	-	-3.63448	1.06282e-31	DN	-4.35712	1.27376e-26	DN	4.015	5.54905e-134	UP	-3.05154	2.94625e-36	DN	-2.18621	4.901e-09	DN	1.18138	1.9835e-08	-	-0.342345	1	-	1.22661	1	-	-1.33514	1	-	-3.14672	0.00839529	DN	-1.16623	1	-
ENSMUSG00000089661	Mia	-3.02408	8.72529e-09	DN	-0.413754	1	-	-1.16056	0.336354	-	-3.94405	4.83761e-83	DN	-1.76386	0.178284	-	-3.36916	6.42177e-38	DN	-3.38442	6.24059e-27	DN	-3.80351	2.8088e-39	DN	-3.98628	4.12628e-68	DN	5.86257	5.63387e-294	UP	-3.38228	3.28474e-31	DN	-2.80323	0.000601772	DN	1.57636	1	-	3.40303	1.91555e-08	UP	0.764329	0.41777	-	-0.272062	1	-
ENSMUSG00000007041	Clic1	-3.02773	1.17667e-09	DN	-0.192234	1	-	-0.680128	0.836879	-	0.744461	6.24417e-07	-	-1.78428	0.210028	-	0.731399	9.03622e-05	-	-0.876225	0.000548052	-	-0.751453	0.00176817	-	0.208608	0.336416	-	-1.54068	4.77375e-07	-	-0.331639	0.35789	-	0.542876	0.469934	-	0.109633	1	-	-1.13541	1	-	-1.60953	0.1756	-	-1.03857	1	-
ENSMUSG00000028195	Ccn1	-3.02787	3.1467e-09	DN	-0.747268	1	-	0.676707	0.46783	-	-0.343296	0.0715419	-	-1.66388	0.262772	-	-2.03165	1.87972e-18	DN	-2.5493	3.64894e-18	DN	0.727039	0.00042565	-	-0.0528919	0.970413	-	1.1187	2.30916e-06	-	0.644391	0.00542649	-	0.521961	0.512786	-	0.554818	1	-	1.40841	0.172936	-	2.16471	1.10891e-06	UP	-1.58421	1	-
ENSMUSG00000000983	Wfdc18	-3.03095	1.01604e-07	DN	1.19166	1	-	1.0257	0.200472	-	-0.875247	3.40595e-06	-	-1.16716	0.585328	-	-1.65277	4.39994e-11	-	-3.1744	1.08067e-21	DN	-3.26196	1.38289e-27	DN	-1.49213	1.13613e-12	-	0.0770833	1	-	3.34605	1.39703e-82	UP	-0.254764	1	-	1.24806	1	-	-0.226582	1	-	0.748487	0.488566	-	0.162906	1	-
ENSMUSG00000039865	Slc44a3	-3.03456	4.36965e-07	DN	-0.424953	1	-	0.486921	0.647604	-	-0.735809	0.00011313	-	-1.78717	0.272543	-	-1.88621	7.82767e-13	-	-4.35216	1.8087e-25	DN	-3.41188	1.68565e-24	DN	-1.54296	6.31821e-13	-	3.23976	1.50247e-63	UP	0.759329	0.00128703	-	0.0877954	1	-	1.59522	1	-	2.95927	1.37725e-05	UP	2.12946	5.49471e-06	UP	-0.861543	1	-
ENSMUSG00000002980	Bcam	-3.03599	7.75786e-09	DN	-0.324992	1	-	0.574597	0.497174	-	-0.247688	0.238792	-	-2.26422	0.116083	-	-0.939543	4.03186e-05	-	-2.71554	4.70798e-19	DN	-2.45771	4.50879e-20	DN	0.426219	0.0203036	-	1.63468	8.26832e-14	-	0.843655	9.13248e-05	-	1.22795	0.0109706	-	1.6226	1	-	1.6663	0.0791476	-	0.228622	1	-	-1.33718	1	-
ENSMUSG00000000594	Gm2a	-3.04125	1.29851e-08	DN	-0.220745	1	-	-0.625689	0.911291	-	-1.03844	1.29652e-09	-	0.0743531	1	-	-0.589327	0.0136802	-	0.538258	0.0194911	-	-0.701675	0.00696261	-	-1.76626	8.46633e-19	-	2.89246	1.5001e-52	UP	-0.229705	0.696409	-	-0.890338	0.436163	-	0.411891	1	-	2.15885	0.00711392	UP	1.21281	0.0383664	-	-0.645651	1	-
ENSMUSG00000079523	Tmsb10	-3.04128	1.22689e-09	DN	0.943038	1	-	-0.590565	0.934135	-	0.119271	0.628157	-	-1.08721	0.514635	-	-1.52844	5.46642e-12	-	-3.23752	1.27109e-26	DN	1.14281	1.00164e-09	-	0.765503	2.1875e-06	-	-1.12966	0.000235565	-	0.483913	0.0557843	-	-1.04731	0.287598	-	0.20817	1	-	-1.0487	1	-	-1.3749	0.308401	-	-0.204696	1	-
ENSMUSG00000030218	Mgp	-3.04325	4.37321e-08	DN	0.37601	1	-	0.0865381	1	-	-3.80566	1.58157e-72	DN	-1.97282	0.22443	-	-4.22642	2.07976e-46	DN	-3.76303	1.27781e-27	DN	3.93911	7.47218e-131	UP	-3.60145	6.05026e-54	DN	1.48616	6.15815e-10	-	-0.632997	0.0419353	-	-3.01789	0.000556844	DN	1.46038	1	-	1.2792	0.412114	-	-1.08059	0.657555	-	-0.552643	1	-
ENSMUSG00000042644	Itpr3	-3.05178	5.58912e-08	DN	-0.154277	1	-	0.609791	0.490908	-	0.748967	2.70543e-06	-	-0.473492	1	-	0.401071	0.0648798	-	-1.2898	5.68593e-06	-	-2.14866	6.46976e-15	DN	0.643389	0.000277884	-	-2.62987	9.02392e-13	DN	-0.767674	0.00923375	-	1.94307	1.90844e-06	-	0.868761	1	-	-2.33893	0.746393	-	-2.61729	0.0199343	-	0.418191	1	-
ENSMUSG00000019936	Epyc	-3.05359	4.51826e-07	DN	-1.02471	1	-	-1.42836	0.424396	-	-4.91648	4.02296e-84	DN	-3.12009	0.0688235	-	-2.64925	1.23235e-20	DN	-3.70922	3.311e-23	DN	-2.18675	2.62561e-13	DN	-3.96984	1.17692e-51	DN	5.61225	3.40206e-217	UP	-1.38845	5.72633e-06	-	-3.87126	8.58907e-05	DN	0.660723	1	-	3.62716	2.02347e-08	UP	0.0306218	1	-	-1.24997	1	-
ENSMUSG00000022025	Cnmd	-3.06085	6.22324e-07	DN	-0.286118	1	-	0.613458	0.517461	-	-3.75914	3.28461e-57	DN	-3.0012	0.0815411	-	-4.09759	1.38648e-35	DN	-4.55356	1.18788e-27	DN	-3.36315	4.74777e-24	DN	-3.3488	2.84299e-39	DN	4.56496	1.3244e-134	UP	0.589	0.0306272	-	-0.688753	0.764442	-	1.44757	1	-	3.14666	6.97183e-06	UP	1.98176	0.000145886	-	-1.36195	1	-
ENSMUSG00000021585	Cast	-3.0692	1.13134e-09	DN	-0.495059	1	-	-0.531788	0.993841	-	0.6561	1.83465e-05	-	-1.33142	0.368599	-	0.791769	2.01824e-05	-	0.100429	0.842304	-	-1.098	3.94087e-06	-	0.490578	0.00491153	-	-2.71121	5.47023e-16	DN	-1.03238	4.72335e-05	-	0.108848	1	-	-0.954805	1	-	-2.122	0.782711	-	-2.22163	0.0318014	-	-1.37633	1	-
ENSMUSG00000022952	Runx1	-3.06957	2.77519e-09	DN	-1.1889	1	-	0.89608	0.182777	-	0.119471	0.634354	-	0.294679	0.842925	-	0.336635	0.130527	-	0.244516	0.368774	-	-0.0926267	0.901879	-	0.130015	0.628348	-	-1.43715	7.69961e-06	-	-0.0513677	1	-	0.743686	0.194756	-	-1.3677	1	-	-0.477918	1	-	-0.878476	0.739608	-	-1.22921	1	-
ENSMUSG00000033213	AA467197	-3.07186	3.27469e-07	DN	-1.63505	1	-	-2.62371	0.0438673	-	-1.48197	3.14376e-14	-	1.15884	0.181437	-	0.517561	0.0250759	-	4.01725	1.91009e-112	UP	-1.6557	6.65272e-09	-	-3.18886	4.21175e-38	DN	-4.83457	5.63528e-24	DN	-1.84568	1.04057e-09	-	-1.87943	0.0603341	-	-3.15399	1	-	-2.86347	0.696726	-	-3.58045	0.00375375	DN	-3.01495	1	-
ENSMUSG00000022587	Ly6e	-3.08001	1.07759e-10	DN	-0.261145	1	-	-0.1946	1	-	0.297226	0.0955755	-	-0.485409	0.942846	-	0.667356	0.000408842	-	0.455306	0.0453015	-	-2.78513	2.52923e-27	DN	-0.223734	0.334185	-	-0.124158	0.928324	-	0.317313	0.31235	-	0.450138	0.606754	-	0.421918	1	-	0.199593	1	-	-0.347486	1	-	-1.33261	1	-
ENSMUSG00000041827	Oasl1	-3.08083	2.76307e-08	DN	-1.27611	1	-	-1.80014	0.148932	-	-0.040621	1	-	-0.397277	1	-	1.97942	1.32467e-30	-	2.20251	5.02443e-30	UP	-3.50624	2.79375e-30	DN	-2.19552	3.59392e-25	DN	-4.05301	5.91694e-23	DN	-1.73183	4.81205e-10	-	-1.34928	0.161088	-	-1.6543	1	-	-2.68638	0.610445	-	-3.4293	0.00185281	DN	-2.3233	1	-
ENSMUSG00000040717	Il17rd	-3.09247	2.08547e-06	DN	-0.4121	1	-	0.95306	0.234729	-	-1.89805	1.37214e-19	-	-1.14101	0.586328	-	-2.00353	1.66634e-12	DN	-1.55639	1.56573e-06	-	-0.0345637	1	-	-1.76161	3.24117e-14	-	3.28294	2.84287e-60	UP	0.45893	0.133823	-	0.483136	0.577981	-	1.86191	1	-	3.5646	8.44641e-09	UP	-0.0232646	1	-	-1.33453	1	-
ENSMUSG00000106874	Gm20186	-3.09408	2.48486e-09	DN	-1.84997	1	-	0.463144	0.618575	-	0.829948	4.26357e-08	-	-2.93721	0.0263253	-	0.0646475	0.951027	-	-2.81546	1.29369e-20	DN	-2.50841	3.06056e-21	DN	0.441291	0.0156456	-	-2.7597	1.12587e-15	DN	1.13944	1.36852e-08	-	0.574444	0.365827	-	-1.88443	1	-	-2.33101	0.713311	-	-1.14372	0.500085	-	-1.28607	1	-
ENSMUSG00000071637	Cebpd	-3.10721	5.55865e-09	DN	0.107606	1	-	0.342726	0.769306	-	-3.0198	2.5521e-54	DN	-1.1644	0.496221	-	-3.4382	3.38045e-37	DN	-3.49096	1.70302e-26	DN	2.17496	2.03669e-36	UP	-2.71754	2.71589e-37	DN	1.51089	2.36962e-11	-	1.39462	7.77085e-13	-	-2.1621	0.00990549	DN	-0.298859	1	-	-0.0438634	1	-	3.1248	2.71582e-17	UP	0.437516	1	-
ENSMUSG00000090394	4930523C07Rik	-3.10807	9.87601e-09	DN	-0.971677	1	-	0.497674	0.600411	-	0.273269	0.159145	-	-0.577892	1	-	0.643489	0.00129427	-	0.403137	0.084535	-	-1.79375	5.51927e-12	-	-0.0664584	0.919701	-	-0.198491	0.819718	-	-0.302769	0.499214	-	-0.210906	1	-	-1.44278	1	-	-0.147019	1	-	1.67927	0.000776146	-	-3.3048	1	-
ENSMUSG00000021509	Slc25a48	-3.11918	2.97468e-08	DN	-1.69559	1	-	-1.16766	0.456164	-	0.122293	0.651487	-	0.343736	0.815475	-	1.08717	7.87095e-09	-	2.50381	6.36765e-41	UP	-4.42071	9.29074e-38	DN	-1.12771	1.40066e-08	-	-3.72458	5.49631e-20	DN	-1.74419	3.67916e-10	-	-0.0476134	1	-	-0.424142	1	-	-4.78084	0.132444	-	-2.71415	0.0145895	-	-0.608596	1	-
ENSMUSG00000020044	Timp3	-3.13211	7.58249e-09	DN	-0.950996	1	-	1.074	0.10077	-	-2.12333	4.20668e-31	DN	-2.86787	0.0467111	-	-3.5006	3.24053e-37	DN	-4.60592	8.85486e-37	DN	2.51069	6.61258e-49	UP	-1.22665	3.46932e-10	-	-1.73487	3.05223e-07	-	1.62224	3.14585e-17	-	-0.685062	0.687007	-	0.410014	1	-	-0.560435	1	-	2.86723	4.225e-13	UP	-1.10429	1	-
ENSMUSG00000041120	Nbl1	-3.13478	4.00245e-09	DN	-0.503538	1	-	-1.31181	0.3407	-	0.117747	0.652104	-	-1.61705	0.277416	-	0.87412	3.47312e-06	-	-0.900823	0.000851311	-	1.37246	2.04537e-13	-	-0.964906	3.84759e-07	-	-0.514521	0.180191	-	-0.245115	0.645528	-	-0.703689	0.622232	-	-0.712158	1	-	-1.37155	1	-	-1.00974	0.620489	-	-1.34015	1	-
ENSMUSG00000026249	Serpine2	-3.15043	2.46616e-09	DN	-0.213821	1	-	0.0172244	1	-	-1.23416	7.02899e-13	-	-2.49928	0.0802916	-	-2.92314	3.36921e-30	DN	-3.80242	2.50678e-30	DN	2.98264	1.29701e-76	UP	0.419326	0.024092	-	-2.79559	1.37303e-15	DN	-1.12717	1.49879e-05	-	1.03959	0.0455755	-	1.11652	1	-	-1.58046	1	-	0.760541	0.323278	-	-1.6592	1	-
ENSMUSG00000030717	Nupr1	-3.15051	1.21562e-09	DN	-0.423147	1	-	-1.04998	0.398102	-	0.123471	0.624288	-	1.02089	0.242611	-	1.08133	2.7038e-09	-	2.15007	1.31525e-30	UP	-1.35234	3.57319e-08	-	-1.91968	1.42714e-22	-	-2.5937	6.76652e-15	DN	-0.672946	0.016575	-	-1.45666	0.064399	-	-1.42439	1	-	-2.62959	0.610445	-	-1.02633	0.451022	-	-0.93861	1	-
ENSMUSG00000018217	Pmp22	-3.15074	1.09876e-07	DN	-0.447795	1	-	-0.470083	1	-	-0.929129	6.51728e-07	-	-2.00326	0.215844	-	-1.18611	1.74341e-06	-	-4.2418	1.78412e-26	DN	3.18611	2.55383e-78	UP	-1.01755	9.20229e-07	-	-2.46073	8.69559e-11	DN	0.311757	0.357098	-	0.313787	0.775995	-	0.889886	1	-	-1.00803	1	-	-1.86134	0.159883	-	-0.714117	1	-
ENSMUSG00000056220	Pla2g4a	-3.15255	1.64694e-08	DN	0.0483134	1	-	-0.577361	0.966055	-	0.0220828	1	-	-2.68508	0.0689499	-	-0.786521	0.000963818	-	-3.03111	2.80271e-20	DN	2.01969	2.32179e-29	UP	0.692353	7.78201e-05	-	-2.74336	7.29779e-14	DN	-1.30665	1.93926e-06	-	0.278583	0.808129	-	-0.657357	1	-	-1.56368	1	-	-3.73817	0.0007504	DN	-0.65698	1	-
ENSMUSG00000056888	Glipr1	-3.15278	1.22e-07	DN	-0.113783	1	-	-1.10407	0.537926	-	-0.388655	0.0622468	-	-1.71195	0.292825	-	-1.74933	9.68934e-12	-	-3.38655	1.26783e-20	DN	3.09564	1.25614e-71	UP	0.212175	0.36247	-	-5.02252	6.42555e-24	DN	-2.94863	6.51007e-20	DN	0.354049	0.723053	-	1.0587	1	-	-2.05013	0.912768	-	-3.44585	0.00370406	DN	-1.20189	1	-
ENSMUSG00000015090	Ptgds	-3.15417	0.000299569	DN	0.468747	1	-	0.36833	0.792173	-	-3.55156	1.02824e-31	DN	-2.10012	0.527818	-	-4.57918	7.41113e-25	DN	-4.33878	2.67395e-16	DN	-3.21143	1.90514e-13	DN	-4.11771	5.71669e-31	DN	2.91721	1.20154e-24	UP	0.808584	0.024019	-	-2.22427	0.192403	-	0.792879	1	-	2.02723	0.13503	-	5.16326	5.09163e-38	UP	-1.07392	1	-
ENSMUSG00000056708	Ier5	-3.15836	1.67323e-09	DN	-0.7166	1	-	-0.277058	1	-	-0.271891	0.183202	-	1.92905	0.000504104	-	0.502926	0.0142884	-	2.05002	9.77877e-28	UP	-0.243054	0.452009	-	-1.15961	8.21456e-10	-	-1.18806	0.00027687	-	-0.713352	0.00949132	-	-1.55291	0.0761644	-	-2.45503	1	-	-1.0364	1	-	-1.07541	0.566011	-	-0.774867	1	-
ENSMUSG00000049775	Tmsb4x	-3.1594	4.488e-11	DN	0.146636	1	-	-1.14338	0.302833	-	0.375566	0.0260668	-	-1.19444	0.336487	-	0.450601	0.0264101	-	-0.607422	0.0178026	-	-0.577764	0.0193339	-	0.157492	0.512119	-	-0.329488	0.412279	-	0.566516	0.0163208	-	-1.80807	0.0120022	-	-0.579373	1	-	-1.47042	0.764817	-	-0.96068	0.477096	-	-0.491639	1	-
ENSMUSG00000055044	Pdlim1	-3.16028	1.0132e-09	DN	-0.108559	1	-	-0.946863	0.600617	-	0.98979	1.60953e-11	-	-1.37102	0.357663	-	0.690111	0.000338233	-	-1.38344	2.79078e-07	-	-2.77788	4.54345e-25	DN	1.07352	7.86802e-12	-	-2.36872	1.2088e-12	DN	-1.92506	2.86274e-13	-	-0.487288	0.897868	-	-0.910779	1	-	-1.8465	0.940671	-	-3.24222	0.00117503	DN	-0.823241	1	-
ENSMUSG00000028464	Tpm2	-3.16089	5.12233e-10	DN	0.60391	1	-	-0.426186	1	-	0.51433	0.00131362	-	-1.11764	0.495403	-	-0.0172702	1	-	-1.77622	3.47813e-11	-	0.0381321	1	-	1.18782	8.83731e-15	-	-2.72548	5.18426e-16	DN	-1.12388	8.89526e-06	-	-0.152385	1	-	-0.20291	1	-	-1.53631	1	-	-2.88009	0.0034764	DN	0.0314115	1	-
ENSMUSG00000021390	Ogn	-3.18304	1.35742e-07	DN	-0.285566	1	-	0.886786	0.247085	-	-3.71076	1.77847e-58	DN	-2.52242	0.137046	-	-5.03229	3.13991e-45	DN	-4.3072	5.22282e-27	DN	3.35818	3.81299e-85	UP	-4.15302	2.49938e-53	DN	-2.4121	3.52957e-10	DN	1.94916	7.10971e-23	-	-1.07797	0.369906	-	1.60972	1	-	-1.40107	1	-	1.30409	0.037771	-	-0.816758	1	-
ENSMUSG00000035547	Capn5	-3.1838	2.45232e-09	DN	-1.02312	1	-	-0.276447	1	-	0.257425	0.18531	-	0.923533	0.256979	-	1.46137	3.68067e-17	-	2.15932	5.7713e-31	UP	-3.26692	5.28762e-30	DN	-2.12531	1.08672e-25	DN	-2.41793	1.75855e-12	DN	-1.6854	2.70295e-10	-	-0.746371	0.579303	-	-1.53094	1	-	-2.02183	0.859209	-	-2.16684	0.0493543	-	-0.391676	1	-
ENSMUSG00000029761	Cald1	-3.18801	3.30565e-10	DN	0.32727	1	-	-0.0380477	1	-	-0.00501709	1	-	-1.75999	0.218613	-	-1.0801	8.30802e-07	-	-3.00124	1.13604e-23	DN	1.34699	1.58725e-13	-	0.790256	9.99222e-07	-	-2.38045	1.17032e-13	DN	0.304242	0.346854	-	0.274201	0.903473	-	-0.376779	1	-	-1.75385	0.989916	-	-2.15979	0.0395243	-	-0.674395	1	-
ENSMUSG00000031673	Cdh11	-3.19005	3.42055e-08	DN	-0.761935	1	-	-0.809566	0.776583	-	-3.88994	6.20564e-67	DN	-3.20885	0.0335178	-	-4.72797	3.32099e-46	DN	-4.34949	1.6141e-29	DN	6.06075	0	UP	-4.16841	6.70814e-58	DN	-1.55791	9.60784e-06	-	-3.44747	3.53354e-26	DN	-3.18923	0.000385783	DN	0.549607	1	-	-0.0515976	1	-	-1.14853	0.569856	-	-0.0156246	1	-
ENSMUSG00000079017	Ifi27l2a	-3.19688	3.86538e-09	DN	0.335318	1	-	-0.282666	1	-	-0.876167	6.51007e-07	-	-0.25827	1	-	-0.0729885	0.975478	-	-0.268854	0.411551	-	-0.901172	0.000354496	-	-2.23874	5.97731e-27	DN	2.07757	1.50592e-22	UP	1.36992	5.24154e-12	-	-2.31521	0.00622791	DN	-0.111848	1	-	0.266588	1	-	1.99582	3.91513e-05	-	0.44122	1	-
ENSMUSG00000023232	Serinc2	-3.20179	4.16887e-10	DN	-0.753581	1	-	-0.593641	0.928578	-	0.69097	5.91689e-06	-	-0.857167	0.704772	-	1.00189	2.53235e-08	-	0.438198	0.0594597	-	-2.76907	1.80117e-25	DN	-0.00659678	1	-	-2.2337	8.71558e-12	DN	-0.581095	0.0409857	-	0.937354	0.100309	-	-0.0587467	1	-	-1.67707	1	-	-2.32103	0.0242664	-	-1.05996	1	-
ENSMUSG00000037405	Icam1	-3.21693	2.24102e-08	DN	-0.667838	1	-	0.815267	0.280543	-	-1.09518	1.7704e-09	-	-2.38591	0.127912	-	-3.07095	3.79122e-28	DN	-4.11207	7.53072e-28	DN	2.32461	1.06628e-39	UP	0.18081	0.475437	-	-1.62871	2.94139e-06	-	0.95474	1.49592e-05	-	0.956971	0.0909321	-	0.841619	1	-	-0.48725	1	-	-0.662248	1	-	-1.78064	1	-
ENSMUSG00000074141	Il4i1	-3.22103	4.08383e-07	DN	-2.69304	1	-	-2.21507	0.139875	-	-0.0372323	1	-	0.559997	0.579465	-	1.96897	2.33297e-24	-	2.58355	5.78853e-35	UP	-4.23666	1.07097e-31	DN	-4.62533	3.07951e-58	DN	-4.21367	6.48068e-20	DN	-5.10863	4.58631e-37	DN	-0.305642	1	-	-1.9939	1	-	-3.44127	0.654438	-	-5.42221	0.000108035	DN	-1.26993	1	-
ENSMUSG00000025809	Itgb1	-3.22481	2.15676e-10	DN	-0.461079	1	-	-0.348389	1	-	0.341827	0.0500531	-	-2.20382	0.114487	-	-0.203169	0.497944	-	-1.84191	7.77041e-12	-	-0.0506782	1	-	0.8903	2.06519e-08	-	-1.76092	1.4537e-08	-	-0.691479	0.0105465	-	2.16105	8.47128e-09	UP	1.41883	1	-	-1.08735	1	-	-1.70271	0.144855	-	-1.51084	1	-
ENSMUSG00000022548	Apod	-3.22516	8.48194e-06	DN	-0.633508	1	-	0.410658	0.737591	-	-4.42481	4.95569e-58	DN	-2.27194	0.320976	-	-3.9413	6.48146e-28	DN	-3.36614	8.23389e-16	DN	6.25355	6.48759e-240	UP	-4.95746	1.47768e-53	DN	-4.22007	1.48324e-16	DN	-3.40233	3.05318e-18	DN	-3.40458	0.00516971	DN	1.64938	1	-	-2.17302	1	-	-3.47552	0.0372973	-	-1.32469	1	-
ENSMUSG00000025650	Col7a1	-3.23555	5.05157e-08	DN	0.0802565	1	-	1.50657	0.0107892	-	-0.663619	0.000497018	-	-1.1171	0.567046	-	-1.43974	9.20429e-09	-	-2.30887	6.05448e-13	DN	0.165918	0.607102	-	1.78203	8.9386e-30	-	-2.81914	3.9827e-13	DN	-2.15105	5.42209e-13	DN	2.84943	4.01344e-16	UP	1.30536	1	-	-2.73537	0.644508	-	-4.54644	0.000248993	DN	0.0215538	1	-
ENSMUSG00000022371	Col14a1	-3.24346	2.39353e-06	DN	-0.959626	1	-	-0.343403	1	-	-4.22379	1.4258e-54	DN	-2.77585	0.156567	-	-4.34274	3.02767e-31	DN	-5.67965	3.7444e-27	DN	5.63093	6.36271e-217	UP	-4.02238	4.47406e-41	DN	-4.0802	5.4637e-16	DN	-1.37906	3.44744e-05	-	-3.56513	0.00147903	DN	2.20074	1	-	-4.24155	0.436947	-	1.02013	0.210709	-	-0.068896	1	-
ENSMUSG00000027134	Lpcat4	-3.24456	3.53891e-09	DN	-1.96596	1	-	-1.13319	0.482519	-	-0.45665	0.0146483	-	1.0566	0.195813	-	1.2419	7.42998e-12	-	2.88584	2.05648e-59	UP	-2.66668	1.36334e-21	DN	-1.72696	9.9978e-18	-	-3.48702	6.65605e-20	DN	-1.97486	8.7791e-13	-	-0.69955	0.649267	-	-1.49909	1	-	-2.37901	0.716531	-	-3.0081	0.00488669	DN	-1.94573	1	-
ENSMUSG00000019539	Rcn3	-3.24671	1.57784e-08	DN	-0.332732	1	-	-1.03131	0.587301	-	-4.31767	3.16698e-77	DN	-2.7791	0.0688235	-	-3.86564	5.25301e-38	DN	-4.17562	7.14056e-29	DN	5.2602	9.5116e-260	UP	-4.11318	3.23793e-58	DN	0.218323	0.568942	-	-2.99739	3.43681e-22	DN	-2.90391	0.00096809	DN	1.82335	1	-	0.919957	0.560565	-	-1.38478	0.378353	-	-1.07301	1	-
ENSMUSG00000026327	Serpinb11	-3.25551	7.76329e-09	DN	-2.59538	0.578514	-	-1.49623	0.264145	-	-0.610126	0.00085557	-	0.0233194	1	-	1.77439	2.53571e-24	-	2.82224	1.73969e-54	UP	-4.67588	1.77236e-41	DN	-3.84219	2.85444e-55	DN	-4.75297	1.018e-26	DN	-0.892311	0.00172201	-	-0.31047	1	-	-2.15961	1	-	-3.60696	0.307653	-	-5.00268	2.6023e-05	DN	-3.02102	1	-
ENSMUSG00000030790	Adm	-3.26531	1.05995e-08	DN	-0.374763	1	-	0.0791837	1	-	-0.566164	0.00248604	-	-0.544904	1	-	-1.51664	6.14015e-10	-	-2.47205	4.52645e-15	DN	2.33219	1.11178e-39	UP	-0.639429	0.00168635	-	-2.04472	8.14339e-09	DN	1.17921	2.08256e-08	-	-0.211654	1	-	0.0845143	1	-	-0.443294	1	-	-2.12019	0.081507	-	-0.779405	1	-
ENSMUSG00000097296	Gm26532	-3.2716	3.69443e-09	DN	-1.73567	1	-	1.65214	0.00225874	-	-0.213972	0.348874	-	-1.43669	0.361639	-	-0.429596	0.0827688	-	-1.18229	2.36236e-05	-	0.485632	0.0382392	-	-0.356895	0.0993705	-	1.03476	3.5124e-05	-	-0.12434	0.942587	-	1.39256	0.00320918	-	-1.49956	1	-	2.40704	0.0016588	UP	0.702858	0.401037	-	-1.361	1	-
ENSMUSG00000030551	Nr2f2	-3.27808	2.18874e-10	DN	-1.08812	1	-	-0.103563	1	-	0.867986	4.66726e-09	-	-1.42137	0.334747	-	0.739613	9.04887e-05	-	-0.731587	0.00452189	-	-0.437915	0.0982455	-	0.319078	0.0987704	-	-2.28576	3.71903e-12	DN	-1.05728	3.36304e-05	-	0.262574	0.805022	-	-1.21024	1	-	-1.93936	0.88044	-	-2.61241	0.00946944	DN	-1.27841	1	-
ENSMUSG00000027570	Col9a3	-3.28294	2.34412e-06	DN	-0.330324	1	-	1.2363	0.0846987	-	-3.18383	1.00035e-37	DN	-1.44804	0.429892	-	-2.75653	6.34731e-18	DN	-3.83781	3.13948e-18	DN	-2.20091	1.5232e-11	DN	-3.18806	4.4789e-30	DN	4.19383	2.75069e-104	UP	-0.591278	0.123814	-	-1.48059	0.192389	-	1.46221	1	-	4.02642	2.34456e-12	UP	3.00195	6.28262e-13	UP	0.477524	1	-
ENSMUSG00000031586	Rbpms	-3.28497	1.47622e-09	DN	-0.267281	1	-	1.34015	0.0221609	-	-0.453109	0.0141655	-	-1.77353	0.241129	-	-0.762287	0.000807729	-	-2.95036	7.27355e-21	DN	0.169997	0.606338	-	-0.972565	3.46898e-07	-	1.42542	4.61928e-10	-	0.666844	0.00447885	-	-0.54075	0.845907	-	-0.833976	1	-	1.74998	0.0614723	-	3.2166	7.27989e-19	UP	-0.432575	1	-
ENSMUSG00000033192	Lpcat2	-3.28902	1.74998e-08	DN	-0.586928	1	-	-0.172502	1	-	-0.326546	0.12077	-	-1.55418	0.322114	-	-1.0731	8.61902e-06	-	-2.12858	5.25863e-12	DN	-2.72256	2.55272e-20	DN	0.496651	0.00763194	-	2.37168	2.30103e-30	UP	-0.349209	0.411624	-	1.39826	0.00345538	-	0.954084	1	-	2.5136	0.000768312	UP	-0.231886	1	-	-1.43729	1	-
ENSMUSG00000046841	Ckap4	-3.31065	2.06334e-10	DN	-1.34312	1	-	-1.31014	0.326476	-	-0.366987	0.0492983	-	0.252994	0.898521	-	0.42205	0.044455	-	1.61233	7.58524e-17	-	0.622937	0.0032894	-	-0.399251	0.0480528	-	-0.937447	0.00415532	-	-1.07503	2.51083e-05	-	0.0801889	1	-	0.134722	1	-	-1.43715	1	-	-2.03313	0.0598797	-	-2.07575	1	-
ENSMUSG00000006519	Cyba	-3.31333	2.02223e-10	DN	-0.264215	1	-	0.0097396	1	-	0.0353486	0.997084	-	-2.13488	0.137046	-	-0.202379	0.505943	-	-2.24025	4.74542e-15	DN	0.97004	6.51469e-07	-	-1.26056	1.70914e-11	-	-0.644694	0.0530992	-	1.6103	2.55628e-18	-	0.248679	0.830705	-	1.11666	1	-	-0.688398	1	-	-0.245138	1	-	-1.28037	1	-
ENSMUSG00000040525	Cblc	-3.31354	8.74491e-10	DN	-0.793729	1	-	-0.702333	0.827776	-	0.284299	0.132042	-	0.996121	0.216073	-	1.2799	4.7368e-13	-	2.04659	1.91696e-27	UP	-3.92231	8.90341e-38	DN	-1.46067	5.93689e-14	-	-2.08431	5.31926e-10	DN	-1.03641	0.000110759	-	-1.50476	0.0892714	-	-0.972836	1	-	-1.81198	0.965607	-	-2.16083	0.0484174	-	-0.0562541	1	-
ENSMUSG00000036402	Gng12	-3.31566	1.01282e-09	DN	0.246935	1	-	-0.311719	1	-	-0.286189	0.159841	-	-1.59428	0.285978	-	-1.12361	9.67526e-07	-	-2.68782	1.66768e-18	DN	1.70557	2.6708e-21	-	0.0992106	0.766342	-	-0.271725	0.621718	-	0.701668	0.00231013	-	-1.05556	0.296306	-	-0.123848	1	-	-1.09437	1	-	-0.0469243	1	-	-1.92638	1	-
ENSMUSG00000026335	Pam	-3.31711	1.06048e-09	DN	-0.52412	1	-	-0.236255	1	-	-0.0319092	1	-	-1.23871	0.433836	-	0.286438	0.232225	-	-0.115831	0.927325	-	1.43013	1.45257e-14	-	-0.814582	2.04714e-05	-	-1.49935	5.10055e-06	-	0.208777	0.639422	-	0.380925	0.640184	-	0.562844	1	-	-1.09581	1	-	-1.3168	0.371077	-	-1.19053	1	-
ENSMUSG00000057530	Ece1	-3.31772	1.18233e-09	DN	-0.760794	1	-	0.0810255	1	-	0.307996	0.0959246	-	-0.945209	0.643749	-	0.209129	0.436049	-	0.235445	0.360437	-	-0.745033	0.00378793	-	0.447932	0.0145555	-	-1.92843	8.60729e-09	-	-0.724312	0.0115089	-	2.04425	1.18721e-07	UP	1.36023	1	-	-1.12582	1	-	-2.02524	0.0731798	-	-0.831671	1	-
ENSMUSG00000004665	Cnn2	-3.31913	3.84322e-10	DN	0.295579	1	-	-0.41115	1	-	0.192368	0.365914	-	-1.08109	0.530497	-	-0.359067	0.149816	-	-1.44522	1.1511e-07	-	0.94813	1.55467e-06	-	0.492164	0.00564607	-	-0.297246	0.557446	-	-0.270213	0.534963	-	-0.774091	0.53797	-	-0.199359	1	-	-0.130595	1	-	-0.518809	1	-	-0.424796	1	-
ENSMUSG00000039831	Arhgap29	-3.3211	1.21562e-09	DN	-0.780366	1	-	-0.52907	1	-	0.493924	0.00312581	-	0.0547144	1	-	1.10565	1.44187e-09	-	1.20342	6.09358e-09	-	-1.37339	5.82827e-08	-	-0.342672	0.111176	-	-1.59925	1.38106e-06	-	-1.66288	6.05019e-10	-	-0.279497	1	-	-1.48515	1	-	-1.22565	1	-	-1.86896	0.113464	-	-0.515964	1	-
ENSMUSG00000027797	Dclk1	-3.32654	5.51186e-09	DN	-0.760774	1	-	1.33389	0.0288361	-	-3.91019	1.01631e-70	DN	-2.71834	0.0723021	-	-3.70654	3.35576e-37	DN	-4.35644	3.11978e-31	DN	0.0860372	0.844437	-	-3.77304	4.874e-54	DN	3.69939	1.97861e-92	UP	-0.471423	0.191781	-	-2.59481	0.00285536	DN	-0.70527	1	-	2.78922	6.37559e-05	UP	3.97473	3.94223e-34	UP	0.211253	1	-
ENSMUSG00000039607	Rbms3	-3.33909	3.12086e-09	DN	-0.510569	1	-	0.967786	0.154327	-	-1.14305	1.16788e-10	-	-2.85269	0.0484914	-	-2.45176	1.0947e-21	DN	-4.6467	1.35397e-33	DN	1.05384	1.20255e-07	-	-0.414613	0.0537657	-	1.06363	1.1145e-05	-	1.62516	1.49762e-17	-	-0.412994	1	-	-0.717803	1	-	0.802482	0.654136	-	2.29568	1.01007e-07	UP	-0.71737	1	-
ENSMUSG00000029622	Arpc1b	-3.33969	5.68097e-11	DN	0.0911581	1	-	-0.763494	0.753761	-	0.444641	0.00656806	-	-1.74548	0.218628	-	0.0739445	0.90387	-	-1.66109	3.26993e-10	-	0.4119	0.0742639	-	0.190169	0.396817	-	0.00810792	1	-	0.120908	0.883153	-	-1.0385	0.288957	-	-0.572939	1	-	-0.900529	1	-	-0.428337	1	-	-0.86067	1	-
ENSMUSG00000038781	Stap2	-3.34945	1.47404e-09	DN	-0.753314	1	-	0.222854	0.926525	-	0.00273213	1	-	0.939697	0.253705	-	1.23608	5.36548e-12	-	1.46803	2.59772e-13	-	-3.15064	2.28955e-27	DN	-1.09636	1.74308e-08	-	-0.658908	0.0690361	-	-0.192727	0.792577	-	-0.462114	0.940971	-	-2.37364	1	-	-0.113536	1	-	-0.276724	1	-	-1.23438	1	-
ENSMUSG00000026586	Prrx1	-3.35199	2.66738e-08	DN	-0.81291	1	-	-0.723054	0.838548	-	-1.59975	3.05069e-17	-	-3.22268	0.0366913	-	-1.95012	5.50239e-14	-	-3.15399	2.89194e-19	DN	4.42948	1.87658e-167	UP	-1.48186	1.6324e-12	-	-1.16512	0.00105389	-	-2.67019	1.066e-17	DN	-1.07638	0.337852	-	-1.10974	1	-	-0.55314	1	-	-4.27526	0.000485189	DN	-0.708185	1	-
ENSMUSG00000042734	Ttc9	-3.36645	2.88965e-10	DN	-1.06501	1	-	-1.32399	0.322847	-	0.536362	0.000933478	-	-0.441838	1	-	1.25363	1.35671e-12	-	1.40967	1.69097e-12	-	-3.79345	1.95772e-37	DN	-0.223647	0.349983	-	-2.69292	6.14308e-15	DN	-1.29985	6.9029e-07	-	-1.01982	0.314417	-	-1.16075	1	-	-1.70669	1	-	-3.10241	0.00221151	DN	-0.92921	1	-
ENSMUSG00000064325	Hhip	-3.37934	8.68794e-06	DN	-0.700678	1	-	-0.89941	0.884775	-	-3.88888	1.24829e-42	DN	-3.13432	0.152601	-	-5.61525	5.54664e-33	DN	-5.22914	8.37252e-22	DN	6.93204	1.77447e-262	UP	-4.48061	3.07148e-39	DN	-5.1192	9.60927e-17	DN	-4.17239	1.34248e-20	DN	-3.70078	0.00336765	DN	0.414914	1	-	-3.79184	0.657497	-	-3.60142	0.0292538	-	-0.619897	1	-
ENSMUSG00000026365	Cfh	-3.38143	1.30583e-07	DN	-0.959626	1	-	-0.0992003	1	-	-4.09625	5.44944e-61	DN	-2.72059	0.126999	-	-4.51952	1.06493e-37	DN	-4.63381	8.5546e-27	DN	6.34696	1.91641e-303	UP	-4.74552	1.32164e-56	DN	-3.76052	6.9441e-17	DN	-2.56073	5.22752e-15	DN	-3.43937	0.000662526	DN	1.66527	1	-	-1.89185	1	-	-3.77363	0.00373428	DN	-0.944154	1	-
ENSMUSG00000047281	Sfn	-3.38249	4.15448e-11	DN	0.0185122	1	-	-0.774912	0.749504	-	0.719117	2.02966e-06	-	-1.58487	0.275206	-	-0.444463	0.0571418	-	-3.52855	6.88714e-30	DN	-3.88168	1.93029e-42	DN	2.0256	2.1655e-45	UP	-2.85681	2.53842e-17	DN	-1.30279	2.3296e-07	-	-0.422159	0.846757	-	-0.684914	1	-	-1.72693	1	-	-2.86746	0.0035025	DN	-0.48874	1	-
ENSMUSG00000024164	C3	-3.38345	1.51178e-09	DN	-0.263982	1	-	2.22212	6.12979e-06	UP	-2.90952	9.59817e-49	DN	-1.80863	0.256601	-	-3.7	4.07506e-39	DN	-4.05969	9.06338e-31	DN	1.58156	5.454e-17	-	-2.76755	2.26415e-36	DN	0.659604	0.0210939	-	2.41234	1.16451e-41	UP	-0.0397438	1	-	3.07635	0.591411	-	1.78373	0.0621449	-	1.27893	0.0318913	-	0.065518	1	-
ENSMUSG00000041423	Paqr6	-3.39394	3.01155e-07	DN	0.225524	1	-	-0.282053	1	-	-3.91287	6.20425e-53	DN	-2.36962	0.168057	-	-3.91328	1.62992e-29	DN	-3.9304	1.05832e-20	DN	-1.66238	1.70208e-08	-	-3.60532	1.68472e-38	DN	4.71729	1.16583e-148	UP	-1.25936	4.30829e-05	-	-2.5197	0.0111854	-	0.423108	1	-	2.7992	0.000151546	UP	3.46287	5.84662e-21	UP	-1.44232	1	-
ENSMUSG00000039405	Prss23	-3.40281	5.43649e-10	DN	-0.668657	1	-	-1.22544	0.407783	-	-0.143061	0.592912	-	-1.41534	0.356545	-	-0.621334	0.00898557	-	-0.145626	0.839934	-	0.675134	0.001757	-	0.650141	0.000174794	-	0.486894	0.112144	-	-0.674726	0.0216357	-	0.861459	0.12359	-	0.0339398	1	-	-0.72599	1	-	-2.12172	0.0583422	-	-0.880532	1	-
ENSMUSG00000040249	Lrp1	-3.41179	4.1205e-10	DN	-0.57023	1	-	0.482073	0.606919	-	-1.0776	4.35091e-10	-	-2.25985	0.128095	-	-1.44488	6.90685e-10	-	-3.51028	1.52528e-26	DN	3.58145	1.88579e-116	UP	-1.21376	2.47408e-10	-	-1.46271	1.01885e-05	-	-1.17284	1.33142e-05	-	0.598214	0.349357	-	1.7749	1	-	-0.143137	1	-	-2.15554	0.0553767	-	-0.506295	1	-
ENSMUSG00000028755	Cda	-3.41826	1.75475e-10	DN	-0.206155	1	-	-0.911083	0.629244	-	0.363403	0.038434	-	-0.072401	1	-	0.474768	0.021996	-	0.521854	0.0229481	-	-0.846507	0.000729776	-	-0.499393	0.0113425	-	0.152423	0.787462	-	0.372459	0.211525	-	-1.61645	0.0592546	-	-0.796841	1	-	-0.726746	1	-	-0.571398	1	-	-1.05132	1	-
ENSMUSG00000045545	Krt14	-3.42284	3.94892e-11	DN	0.452377	1	-	-0.609415	0.770716	-	-0.0278262	1	-	-1.284	0.405204	-	-1.91898	6.16887e-17	-	-3.18028	3.20654e-26	DN	-3.94921	6.52158e-43	DN	2.85267	2.93491e-93	UP	-3.39321	5.52e-22	DN	-1.86718	4.10625e-13	-	0.958434	0.0913315	-	-0.100845	1	-	-1.72701	1	-	-3.18733	0.00125949	DN	-0.290991	1	-
ENSMUSG00000030157	Clec2d	-3.42375	2.04845e-10	DN	-1.68658	1	-	-0.0151654	1	-	-0.378256	0.0451174	-	1.37455	0.0582834	-	1.15138	1.42452e-10	-	2.56305	1.68361e-46	UP	-1.89379	1.74955e-13	-	-2.28265	4.60795e-29	DN	-2.58142	6.89194e-14	DN	-1.0589	7.60283e-05	-	-0.0826743	1	-	-1.15331	1	-	-2.1854	0.790562	-	-0.287362	1	-	-1.52979	1	-
ENSMUSG00000001507	Itga3	-3.42439	2.70489e-10	DN	-0.210415	1	-	0.7889	0.277514	-	0.29117	0.121143	-	-1.5564	0.30156	-	-0.876648	9.75939e-05	-	-2.45736	1.77159e-16	DN	-3.08403	7.79256e-28	DN	1.25205	9.32911e-16	-	-1.51327	4.00237e-06	-	0.192254	0.690582	-	2.39517	5.70995e-11	UP	1.73598	1	-	-0.557598	1	-	-1.63	0.196813	-	-0.00297275	1	-
ENSMUSG00000032496	Ltf	-3.42584	3.4527e-10	DN	-2.24064	1	-	-1.36752	0.349582	-	-1.13941	1.04304e-10	-	1.09719	0.213041	-	1.23721	1.46588e-11	-	3.48106	4.03566e-92	UP	-4.43548	6.07409e-46	DN	-4.24444	4.55953e-71	DN	-4.06766	6.31246e-26	DN	-1.03315	0.00013154	-	-1.20818	0.233516	-	-1.70594	1	-	-3.94517	0.264133	-	-2.90971	0.0066754	DN	-1.47413	1	-
[truncated: 289 more rows]
[truncated: 3 more columns]

## Sheet: Supple #8
Supplemental Table 8. Primers for qRT-PCR
Oligomer	Accession Number	Forward Sequence	Location	Amplicon Length
[truncated: 14 more rows]

## Sheet: Supple #9
	Table 9. MIQE checklist for authors, reviewers, and editors.
[truncated: 95 more rows]

[truncated: 1 more sheets: Supple #10]
